# Supplementary material
Source: publisher figshare collection journal article supplement (https://springernature.figshare.com/ndownloader/files/17773208)
Supplement: Supplementary file 1 [file 17773208]

track name=SE visibility=2
1	hq_isoforms.fasta.no5merge.collapsed.gff	exon	1318570	1318670	.	-	.	gene_id "SE:1:1318670-1320829:1320886-1321018:-"; transcript_id "SE:1:1318670-1320829:1320886-1321018:-:alternative2";
1	hq_isoforms.fasta.no5merge.collapsed.gff	exon	1321018	1321118	.	-	.	gene_id "SE:1:1318670-1320829:1320886-1321018:-"; transcript_id "SE:1:1318670-1320829:1320886-1321018:-:alternative2";
1	hq_isoforms.fasta.no5merge.collapsed.gff	exon	1318570	1318670	.	-	.	gene_id "SE:1:1318670-1320829:1320886-1321018:-"; transcript_id "SE:1:1318670-1320829:1320886-1321018:-:alternative1";
1	hq_isoforms.fasta.no5merge.collapsed.gff	exon	1320829	1320886	.	-	.	gene_id "SE:1:1318670-1320829:1320886-1321018:-"; transcript_id "SE:1:1318670-1320829:1320886-1321018:-:alternative1";
1	hq_isoforms.fasta.no5merge.collapsed.gff	exon	1321018	1321118	.	-	.	gene_id "SE:1:1318670-1320829:1320886-1321018:-"; transcript_id "SE:1:1318670-1320829:1320886-1321018:-:alternative1";
1	hq_isoforms.fasta.no5merge.collapsed.gff	exon	2739793	2739893	.	-	.	gene_id "SE:1:2739893-2745411:2745499-2746877:-"; transcript_id "SE:1:2739893-2745411:2745499-2746877:-:alternative2";
1	hq_isoforms.fasta.no5merge.collapsed.gff	exon	2746877	2746977	.	-	.	gene_id "SE:1:2739893-2745411:2745499-2746877:-"; transcript_id "SE:1:2739893-2745411:2745499-2746877:-:alternative2";
1	hq_isoforms.fasta.no5merge.collapsed.gff	exon	2739793	2739893	.	-	.	gene_id "SE:1:2739893-2745411:2745499-2746877:-"; transcript_id "SE:1:2739893-2745411:2745499-2746877:-:alternative1";
1	hq_isoforms.fasta.no5merge.collapsed.gff	exon	2745411	2745499	.	-	.	gene_id "SE:1:2739893-2745411:2745499-2746877:-"; transcript_id "SE:1:2739893-2745411:2745499-2746877:-:alternative1";
1	hq_isoforms.fasta.no5merge.collapsed.gff	exon	2746877	2746977	.	-	.	gene_id "SE:1:2739893-2745411:2745499-2746877:-"; transcript_id "SE:1:2739893-2745411:2745499-2746877:-:alternative1";
1	hq_isoforms.fasta.no5merge.collapsed.gff	exon	5741514	5741614	.	-	.	gene_id "SE:1:5741614-5742582:5742742-5747485:-"; transcript_id "SE:1:5741614-5742582:5742742-5747485:-:alternative2";
1	hq_isoforms.fasta.no5merge.collapsed.gff	exon	5747485	5747585	.	-	.	gene_id "SE:1:5741614-5742582:5742742-5747485:-"; transcript_id "SE:1:5741614-5742582:5742742-5747485:-:alternative2";
1	hq_isoforms.fasta.no5merge.collapsed.gff	exon	5741514	5741614	.	-	.	gene_id "SE:1:5741614-5742582:5742742-5747485:-"; transcript_id "SE:1:5741614-5742582:5742742-5747485:-:alternative1";
1	hq_isoforms.fasta.no5merge.collapsed.gff	exon	5742582	5742742	.	-	.	gene_id "SE:1:5741614-5742582:5742742-5747485:-"; transcript_id "SE:1:5741614-5742582:5742742-5747485:-:alternative1";
1	hq_isoforms.fasta.no5merge.collapsed.gff	exon	5747485	5747585	.	-	.	gene_id "SE:1:5741614-5742582:5742742-5747485:-"; transcript_id "SE:1:5741614-5742582:5742742-5747485:-:alternative1";
1	hq_isoforms.fasta.no5merge.collapsed.gff	exon	5504489	5504589	.	-	.	gene_id "SE:1:5504589-5506748:5506847-5506940:-"; transcript_id "SE:1:5504589-5506748:5506847-5506940:-:alternative2";
1	hq_isoforms.fasta.no5merge.collapsed.gff	exon	5506940	5507040	.	-	.	gene_id "SE:1:5504589-5506748:5506847-5506940:-"; transcript_id "SE:1:5504589-5506748:5506847-5506940:-:alternative2";
1	hq_isoforms.fasta.no5merge.collapsed.gff	exon	5504489	5504589	.	-	.	gene_id "SE:1:5504589-5506748:5506847-5506940:-"; transcript_id "SE:1:5504589-5506748:5506847-5506940:-:alternative1";
1	hq_isoforms.fasta.no5merge.collapsed.gff	exon	5506748	5506847	.	-	.	gene_id "SE:1:5504589-5506748:5506847-5506940:-"; transcript_id "SE:1:5504589-5506748:5506847-5506940:-:alternative1";
1	hq_isoforms.fasta.no5merge.collapsed.gff	exon	5506940	5507040	.	-	.	gene_id "SE:1:5504589-5506748:5506847-5506940:-"; transcript_id "SE:1:5504589-5506748:5506847-5506940:-:alternative1";
1	hq_isoforms.fasta.no5merge.collapsed.gff	exon	5646112	5646212	.	-	.	gene_id "SE:1:5646212-5648688:5648756-5650136:-"; transcript_id "SE:1:5646212-5648688:5648756-5650136:-:alternative2";
1	hq_isoforms.fasta.no5merge.collapsed.gff	exon	5650136	5650236	.	-	.	gene_id "SE:1:5646212-5648688:5648756-5650136:-"; transcript_id "SE:1:5646212-5648688:5648756-5650136:-:alternative2";
1	hq_isoforms.fasta.no5merge.collapsed.gff	exon	5646112	5646212	.	-	.	gene_id "SE:1:5646212-5648688:5648756-5650136:-"; transcript_id "SE:1:5646212-5648688:5648756-5650136:-:alternative1";
1	hq_isoforms.fasta.no5merge.collapsed.gff	exon	5648688	5648756	.	-	.	gene_id "SE:1:5646212-5648688:5648756-5650136:-"; transcript_id "SE:1:5646212-5648688:5648756-5650136:-:alternative1";
1	hq_isoforms.fasta.no5merge.collapsed.gff	exon	5650136	5650236	.	-	.	gene_id "SE:1:5646212-5648688:5648756-5650136:-"; transcript_id "SE:1:5646212-5648688:5648756-5650136:-:alternative1";
1	hq_isoforms.fasta.no5merge.collapsed.gff	exon	5648656	5648756	.	-	.	gene_id "SE:1:5648756-5648840:5649159-5650136:-"; transcript_id "SE:1:5648756-5648840:5649159-5650136:-:alternative2";
1	hq_isoforms.fasta.no5merge.collapsed.gff	exon	5650136	5650236	.	-	.	gene_id "SE:1:5648756-5648840:5649159-5650136:-"; transcript_id "SE:1:5648756-5648840:5649159-5650136:-:alternative2";
1	hq_isoforms.fasta.no5merge.collapsed.gff	exon	5648656	5648756	.	-	.	gene_id "SE:1:5648756-5648840:5649159-5650136:-"; transcript_id "SE:1:5648756-5648840:5649159-5650136:-:alternative1";
1	hq_isoforms.fasta.no5merge.collapsed.gff	exon	5648840	5649159	.	-	.	gene_id "SE:1:5648756-5648840:5649159-5650136:-"; transcript_id "SE:1:5648756-5648840:5649159-5650136:-:alternative1";
1	hq_isoforms.fasta.no5merge.collapsed.gff	exon	5650136	5650236	.	-	.	gene_id "SE:1:5648756-5648840:5649159-5650136:-"; transcript_id "SE:1:5648756-5648840:5649159-5650136:-:alternative1";
1	hq_isoforms.fasta.no5merge.collapsed.gff	exon	5657170	5657270	.	-	.	gene_id "SE:1:5657270-5658424:5658611-5659443:-"; transcript_id "SE:1:5657270-5658424:5658611-5659443:-:alternative2";
1	hq_isoforms.fasta.no5merge.collapsed.gff	exon	5659443	5659543	.	-	.	gene_id "SE:1:5657270-5658424:5658611-5659443:-"; transcript_id "SE:1:5657270-5658424:5658611-5659443:-:alternative2";
1	hq_isoforms.fasta.no5merge.collapsed.gff	exon	5657170	5657270	.	-	.	gene_id "SE:1:5657270-5658424:5658611-5659443:-"; transcript_id "SE:1:5657270-5658424:5658611-5659443:-:alternative1";
1	hq_isoforms.fasta.no5merge.collapsed.gff	exon	5658424	5658611	.	-	.	gene_id "SE:1:5657270-5658424:5658611-5659443:-"; transcript_id "SE:1:5657270-5658424:5658611-5659443:-:alternative1";
1	hq_isoforms.fasta.no5merge.collapsed.gff	exon	5659443	5659543	.	-	.	gene_id "SE:1:5657270-5658424:5658611-5659443:-"; transcript_id "SE:1:5657270-5658424:5658611-5659443:-:alternative1";
1	hq_isoforms.fasta.no5merge.collapsed.gff	exon	5734785	5734885	.	-	.	gene_id "SE:1:5734885-5737409:5737471-5739419:-"; transcript_id "SE:1:5734885-5737409:5737471-5739419:-:alternative2";
1	hq_isoforms.fasta.no5merge.collapsed.gff	exon	5739419	5739519	.	-	.	gene_id "SE:1:5734885-5737409:5737471-5739419:-"; transcript_id "SE:1:5734885-5737409:5737471-5739419:-:alternative2";
1	hq_isoforms.fasta.no5merge.collapsed.gff	exon	5734785	5734885	.	-	.	gene_id "SE:1:5734885-5737409:5737471-5739419:-"; transcript_id "SE:1:5734885-5737409:5737471-5739419:-:alternative1";
1	hq_isoforms.fasta.no5merge.collapsed.gff	exon	5737409	5737471	.	-	.	gene_id "SE:1:5734885-5737409:5737471-5739419:-"; transcript_id "SE:1:5734885-5737409:5737471-5739419:-:alternative1";
1	hq_isoforms.fasta.no5merge.collapsed.gff	exon	5739419	5739519	.	-	.	gene_id "SE:1:5734885-5737409:5737471-5739419:-"; transcript_id "SE:1:5734885-5737409:5737471-5739419:-:alternative1";
1	hq_isoforms.fasta.no5merge.collapsed.gff	exon	6279096	6279196	.	-	.	gene_id "SE:1:6279196-6285090:6285149-6286984:-"; transcript_id "SE:1:6279196-6285090:6285149-6286984:-:alternative2";
1	hq_isoforms.fasta.no5merge.collapsed.gff	exon	6286984	6287084	.	-	.	gene_id "SE:1:6279196-6285090:6285149-6286984:-"; transcript_id "SE:1:6279196-6285090:6285149-6286984:-:alternative2";
1	hq_isoforms.fasta.no5merge.collapsed.gff	exon	6279096	6279196	.	-	.	gene_id "SE:1:6279196-6285090:6285149-6286984:-"; transcript_id "SE:1:6279196-6285090:6285149-6286984:-:alternative1";
1	hq_isoforms.fasta.no5merge.collapsed.gff	exon	6285090	6285149	.	-	.	gene_id "SE:1:6279196-6285090:6285149-6286984:-"; transcript_id "SE:1:6279196-6285090:6285149-6286984:-:alternative1";
1	hq_isoforms.fasta.no5merge.collapsed.gff	exon	6286984	6287084	.	-	.	gene_id "SE:1:6279196-6285090:6285149-6286984:-"; transcript_id "SE:1:6279196-6285090:6285149-6286984:-:alternative1";
1	hq_isoforms.fasta.no5merge.collapsed.gff	exon	6919812	6919912	.	-	.	gene_id "SE:1:6919912-6920047:6920187-6920357:-"; transcript_id "SE:1:6919912-6920047:6920187-6920357:-:alternative2";
1	hq_isoforms.fasta.no5merge.collapsed.gff	exon	6920357	6920457	.	-	.	gene_id "SE:1:6919912-6920047:6920187-6920357:-"; transcript_id "SE:1:6919912-6920047:6920187-6920357:-:alternative2";
1	hq_isoforms.fasta.no5merge.collapsed.gff	exon	6919812	6919912	.	-	.	gene_id "SE:1:6919912-6920047:6920187-6920357:-"; transcript_id "SE:1:6919912-6920047:6920187-6920357:-:alternative1";
1	hq_isoforms.fasta.no5merge.collapsed.gff	exon	6920047	6920187	.	-	.	gene_id "SE:1:6919912-6920047:6920187-6920357:-"; transcript_id "SE:1:6919912-6920047:6920187-6920357:-:alternative1";
1	hq_isoforms.fasta.no5merge.collapsed.gff	exon	6920357	6920457	.	-	.	gene_id "SE:1:6919912-6920047:6920187-6920357:-"; transcript_id "SE:1:6919912-6920047:6920187-6920357:-:alternative1";
1	hq_isoforms.fasta.no5merge.collapsed.gff	exon	6964386	6964486	.	-	.	gene_id "SE:1:6964486-6965916:6965989-6966168:-"; transcript_id "SE:1:6964486-6965916:6965989-6966168:-:alternative2";
1	hq_isoforms.fasta.no5merge.collapsed.gff	exon	6966168	6966268	.	-	.	gene_id "SE:1:6964486-6965916:6965989-6966168:-"; transcript_id "SE:1:6964486-6965916:6965989-6966168:-:alternative2";
1	hq_isoforms.fasta.no5merge.collapsed.gff	exon	6964386	6964486	.	-	.	gene_id "SE:1:6964486-6965916:6965989-6966168:-"; transcript_id "SE:1:6964486-6965916:6965989-6966168:-:alternative1";
1	hq_isoforms.fasta.no5merge.collapsed.gff	exon	6965916	6965989	.	-	.	gene_id "SE:1:6964486-6965916:6965989-6966168:-"; transcript_id "SE:1:6964486-6965916:6965989-6966168:-:alternative1";
1	hq_isoforms.fasta.no5merge.collapsed.gff	exon	6966168	6966268	.	-	.	gene_id "SE:1:6964486-6965916:6965989-6966168:-"; transcript_id "SE:1:6964486-6965916:6965989-6966168:-:alternative1";
1	hq_isoforms.fasta.no5merge.collapsed.gff	exon	7165884	7165984	.	-	.	gene_id "SE:1:7165984-7221855:7221910-7226702:-"; transcript_id "SE:1:7165984-7221855:7221910-7226702:-:alternative2";
1	hq_isoforms.fasta.no5merge.collapsed.gff	exon	7226702	7226802	.	-	.	gene_id "SE:1:7165984-7221855:7221910-7226702:-"; transcript_id "SE:1:7165984-7221855:7221910-7226702:-:alternative2";
1	hq_isoforms.fasta.no5merge.collapsed.gff	exon	7165884	7165984	.	-	.	gene_id "SE:1:7165984-7221855:7221910-7226702:-"; transcript_id "SE:1:7165984-7221855:7221910-7226702:-:alternative1";
1	hq_isoforms.fasta.no5merge.collapsed.gff	exon	7221855	7221910	.	-	.	gene_id "SE:1:7165984-7221855:7221910-7226702:-"; transcript_id "SE:1:7165984-7221855:7221910-7226702:-:alternative1";
1	hq_isoforms.fasta.no5merge.collapsed.gff	exon	7226702	7226802	.	-	.	gene_id "SE:1:7165984-7221855:7221910-7226702:-"; transcript_id "SE:1:7165984-7221855:7221910-7226702:-:alternative1";
1	hq_isoforms.fasta.no5merge.collapsed.gff	exon	10514007	10514107	.	-	.	gene_id "SE:1:10514107-10514562:10514653-10514796:-"; transcript_id "SE:1:10514107-10514562:10514653-10514796:-:alternative2";
1	hq_isoforms.fasta.no5merge.collapsed.gff	exon	10514796	10514896	.	-	.	gene_id "SE:1:10514107-10514562:10514653-10514796:-"; transcript_id "SE:1:10514107-10514562:10514653-10514796:-:alternative2";
1	hq_isoforms.fasta.no5merge.collapsed.gff	exon	10514007	10514107	.	-	.	gene_id "SE:1:10514107-10514562:10514653-10514796:-"; transcript_id "SE:1:10514107-10514562:10514653-10514796:-:alternative1";
1	hq_isoforms.fasta.no5merge.collapsed.gff	exon	10514562	10514653	.	-	.	gene_id "SE:1:10514107-10514562:10514653-10514796:-"; transcript_id "SE:1:10514107-10514562:10514653-10514796:-:alternative1";
1	hq_isoforms.fasta.no5merge.collapsed.gff	exon	10514796	10514896	.	-	.	gene_id "SE:1:10514107-10514562:10514653-10514796:-"; transcript_id "SE:1:10514107-10514562:10514653-10514796:-:alternative1";
1	hq_isoforms.fasta.no5merge.collapsed.gff	exon	10514875	10514975	.	-	.	gene_id "SE:1:10514975-10517136:10517280-10519500:-"; transcript_id "SE:1:10514975-10517136:10517280-10519500:-:alternative2";
1	hq_isoforms.fasta.no5merge.collapsed.gff	exon	10519500	10519600	.	-	.	gene_id "SE:1:10514975-10517136:10517280-10519500:-"; transcript_id "SE:1:10514975-10517136:10517280-10519500:-:alternative2";
1	hq_isoforms.fasta.no5merge.collapsed.gff	exon	10514875	10514975	.	-	.	gene_id "SE:1:10514975-10517136:10517280-10519500:-"; transcript_id "SE:1:10514975-10517136:10517280-10519500:-:alternative1";
1	hq_isoforms.fasta.no5merge.collapsed.gff	exon	10517136	10517280	.	-	.	gene_id "SE:1:10514975-10517136:10517280-10519500:-"; transcript_id "SE:1:10514975-10517136:10517280-10519500:-:alternative1";
1	hq_isoforms.fasta.no5merge.collapsed.gff	exon	10519500	10519600	.	-	.	gene_id "SE:1:10514975-10517136:10517280-10519500:-"; transcript_id "SE:1:10514975-10517136:10517280-10519500:-:alternative1";
1	hq_isoforms.fasta.no5merge.collapsed.gff	exon	10511986	10512086	.	-	.	gene_id "SE:1:10512086-10514061:10514107-10514796:-"; transcript_id "SE:1:10512086-10514061:10514107-10514796:-:alternative2";
1	hq_isoforms.fasta.no5merge.collapsed.gff	exon	10514796	10514896	.	-	.	gene_id "SE:1:10512086-10514061:10514107-10514796:-"; transcript_id "SE:1:10512086-10514061:10514107-10514796:-:alternative2";
1	hq_isoforms.fasta.no5merge.collapsed.gff	exon	10511986	10512086	.	-	.	gene_id "SE:1:10512086-10514061:10514107-10514796:-"; transcript_id "SE:1:10512086-10514061:10514107-10514796:-:alternative1";
1	hq_isoforms.fasta.no5merge.collapsed.gff	exon	10514061	10514107	.	-	.	gene_id "SE:1:10512086-10514061:10514107-10514796:-"; transcript_id "SE:1:10512086-10514061:10514107-10514796:-:alternative1";
1	hq_isoforms.fasta.no5merge.collapsed.gff	exon	10514796	10514896	.	-	.	gene_id "SE:1:10512086-10514061:10514107-10514796:-"; transcript_id "SE:1:10512086-10514061:10514107-10514796:-:alternative1";
1	hq_isoforms.fasta.no5merge.collapsed.gff	exon	10514875	10514975	.	-	.	gene_id "SE:1:10514975-10517137:10517280-10519500:-"; transcript_id "SE:1:10514975-10517137:10517280-10519500:-:alternative2";
1	hq_isoforms.fasta.no5merge.collapsed.gff	exon	10519500	10519600	.	-	.	gene_id "SE:1:10514975-10517137:10517280-10519500:-"; transcript_id "SE:1:10514975-10517137:10517280-10519500:-:alternative2";
1	hq_isoforms.fasta.no5merge.collapsed.gff	exon	10514875	10514975	.	-	.	gene_id "SE:1:10514975-10517137:10517280-10519500:-"; transcript_id "SE:1:10514975-10517137:10517280-10519500:-:alternative1";
1	hq_isoforms.fasta.no5merge.collapsed.gff	exon	10517137	10517280	.	-	.	gene_id "SE:1:10514975-10517137:10517280-10519500:-"; transcript_id "SE:1:10514975-10517137:10517280-10519500:-:alternative1";
1	hq_isoforms.fasta.no5merge.collapsed.gff	exon	10519500	10519600	.	-	.	gene_id "SE:1:10514975-10517137:10517280-10519500:-"; transcript_id "SE:1:10514975-10517137:10517280-10519500:-:alternative1";
1	hq_isoforms.fasta.no5merge.collapsed.gff	exon	10514875	10514975	.	-	.	gene_id "SE:1:10514975-10519500:10519660-10528084:-"; transcript_id "SE:1:10514975-10519500:10519660-10528084:-:alternative2";
1	hq_isoforms.fasta.no5merge.collapsed.gff	exon	10528084	10528184	.	-	.	gene_id "SE:1:10514975-10519500:10519660-10528084:-"; transcript_id "SE:1:10514975-10519500:10519660-10528084:-:alternative2";
1	hq_isoforms.fasta.no5merge.collapsed.gff	exon	10514875	10514975	.	-	.	gene_id "SE:1:10514975-10519500:10519660-10528084:-"; transcript_id "SE:1:10514975-10519500:10519660-10528084:-:alternative1";
1	hq_isoforms.fasta.no5merge.collapsed.gff	exon	10519500	10519660	.	-	.	gene_id "SE:1:10514975-10519500:10519660-10528084:-"; transcript_id "SE:1:10514975-10519500:10519660-10528084:-:alternative1";
1	hq_isoforms.fasta.no5merge.collapsed.gff	exon	10528084	10528184	.	-	.	gene_id "SE:1:10514975-10519500:10519660-10528084:-"; transcript_id "SE:1:10514975-10519500:10519660-10528084:-:alternative1";
1	hq_isoforms.fasta.no5merge.collapsed.gff	exon	10514875	10514975	.	-	.	gene_id "SE:1:10514975-10519501:10519660-10528084:-"; transcript_id "SE:1:10514975-10519501:10519660-10528084:-:alternative2";
1	hq_isoforms.fasta.no5merge.collapsed.gff	exon	10528084	10528184	.	-	.	gene_id "SE:1:10514975-10519501:10519660-10528084:-"; transcript_id "SE:1:10514975-10519501:10519660-10528084:-:alternative2";
1	hq_isoforms.fasta.no5merge.collapsed.gff	exon	10514875	10514975	.	-	.	gene_id "SE:1:10514975-10519501:10519660-10528084:-"; transcript_id "SE:1:10514975-10519501:10519660-10528084:-:alternative1";
1	hq_isoforms.fasta.no5merge.collapsed.gff	exon	10519501	10519660	.	-	.	gene_id "SE:1:10514975-10519501:10519660-10528084:-"; transcript_id "SE:1:10514975-10519501:10519660-10528084:-:alternative1";
1	hq_isoforms.fasta.no5merge.collapsed.gff	exon	10528084	10528184	.	-	.	gene_id "SE:1:10514975-10519501:10519660-10528084:-"; transcript_id "SE:1:10514975-10519501:10519660-10528084:-:alternative1";
1	hq_isoforms.fasta.no5merge.collapsed.gff	exon	10514875	10514975	.	-	.	gene_id "SE:1:10514975-10517136:10519660-10528084:-"; transcript_id "SE:1:10514975-10517136:10519660-10528084:-:alternative2";
1	hq_isoforms.fasta.no5merge.collapsed.gff	exon	10528084	10528184	.	-	.	gene_id "SE:1:10514975-10517136:10519660-10528084:-"; transcript_id "SE:1:10514975-10517136:10519660-10528084:-:alternative2";
1	hq_isoforms.fasta.no5merge.collapsed.gff	exon	10514875	10514975	.	-	.	gene_id "SE:1:10514975-10517136:10519660-10528084:-"; transcript_id "SE:1:10514975-10517136:10519660-10528084:-:alternative1";
1	hq_isoforms.fasta.no5merge.collapsed.gff	exon	10517136	10519660	.	-	.	gene_id "SE:1:10514975-10517136:10519660-10528084:-"; transcript_id "SE:1:10514975-10517136:10519660-10528084:-:alternative1";
1	hq_isoforms.fasta.no5merge.collapsed.gff	exon	10528084	10528184	.	-	.	gene_id "SE:1:10514975-10517136:10519660-10528084:-"; transcript_id "SE:1:10514975-10517136:10519660-10528084:-:alternative1";
1	hq_isoforms.fasta.no5merge.collapsed.gff	exon	10514875	10514975	.	-	.	gene_id "SE:1:10514975-10517132:10517280-10519500:-"; transcript_id "SE:1:10514975-10517132:10517280-10519500:-:alternative2";
1	hq_isoforms.fasta.no5merge.collapsed.gff	exon	10519500	10519600	.	-	.	gene_id "SE:1:10514975-10517132:10517280-10519500:-"; transcript_id "SE:1:10514975-10517132:10517280-10519500:-:alternative2";
1	hq_isoforms.fasta.no5merge.collapsed.gff	exon	10514875	10514975	.	-	.	gene_id "SE:1:10514975-10517132:10517280-10519500:-"; transcript_id "SE:1:10514975-10517132:10517280-10519500:-:alternative1";
1	hq_isoforms.fasta.no5merge.collapsed.gff	exon	10517132	10517280	.	-	.	gene_id "SE:1:10514975-10517132:10517280-10519500:-"; transcript_id "SE:1:10514975-10517132:10517280-10519500:-:alternative1";
1	hq_isoforms.fasta.no5merge.collapsed.gff	exon	10519500	10519600	.	-	.	gene_id "SE:1:10514975-10517132:10517280-10519500:-"; transcript_id "SE:1:10514975-10517132:10517280-10519500:-:alternative1";
1	hq_isoforms.fasta.no5merge.collapsed.gff	exon	10701200	10701300	.	-	.	gene_id "SE:1:10701300-10701401:10701615-10702526:-"; transcript_id "SE:1:10701300-10701401:10701615-10702526:-:alternative2";
1	hq_isoforms.fasta.no5merge.collapsed.gff	exon	10702526	10702626	.	-	.	gene_id "SE:1:10701300-10701401:10701615-10702526:-"; transcript_id "SE:1:10701300-10701401:10701615-10702526:-:alternative2";
1	hq_isoforms.fasta.no5merge.collapsed.gff	exon	10701200	10701300	.	-	.	gene_id "SE:1:10701300-10701401:10701615-10702526:-"; transcript_id "SE:1:10701300-10701401:10701615-10702526:-:alternative1";
1	hq_isoforms.fasta.no5merge.collapsed.gff	exon	10701401	10701615	.	-	.	gene_id "SE:1:10701300-10701401:10701615-10702526:-"; transcript_id "SE:1:10701300-10701401:10701615-10702526:-:alternative1";
1	hq_isoforms.fasta.no5merge.collapsed.gff	exon	10702526	10702626	.	-	.	gene_id "SE:1:10701300-10701401:10701615-10702526:-"; transcript_id "SE:1:10701300-10701401:10701615-10702526:-:alternative1";
1	hq_isoforms.fasta.no5merge.collapsed.gff	exon	10714414	10714514	.	-	.	gene_id "SE:1:10714514-10733896:10733985-10734956:-"; transcript_id "SE:1:10714514-10733896:10733985-10734956:-:alternative2";
1	hq_isoforms.fasta.no5merge.collapsed.gff	exon	10734956	10735056	.	-	.	gene_id "SE:1:10714514-10733896:10733985-10734956:-"; transcript_id "SE:1:10714514-10733896:10733985-10734956:-:alternative2";
1	hq_isoforms.fasta.no5merge.collapsed.gff	exon	10714414	10714514	.	-	.	gene_id "SE:1:10714514-10733896:10733985-10734956:-"; transcript_id "SE:1:10714514-10733896:10733985-10734956:-:alternative1";
1	hq_isoforms.fasta.no5merge.collapsed.gff	exon	10733896	10733985	.	-	.	gene_id "SE:1:10714514-10733896:10733985-10734956:-"; transcript_id "SE:1:10714514-10733896:10733985-10734956:-:alternative1";
1	hq_isoforms.fasta.no5merge.collapsed.gff	exon	10734956	10735056	.	-	.	gene_id "SE:1:10714514-10733896:10733985-10734956:-"; transcript_id "SE:1:10714514-10733896:10733985-10734956:-:alternative1";
1	hq_isoforms.fasta.no5merge.collapsed.gff	exon	11838741	11838841	.	-	.	gene_id "SE:1:11838841-11843275:11843439-11844082:-"; transcript_id "SE:1:11838841-11843275:11843439-11844082:-:alternative2";
1	hq_isoforms.fasta.no5merge.collapsed.gff	exon	11844082	11844182	.	-	.	gene_id "SE:1:11838841-11843275:11843439-11844082:-"; transcript_id "SE:1:11838841-11843275:11843439-11844082:-:alternative2";
1	hq_isoforms.fasta.no5merge.collapsed.gff	exon	11838741	11838841	.	-	.	gene_id "SE:1:11838841-11843275:11843439-11844082:-"; transcript_id "SE:1:11838841-11843275:11843439-11844082:-:alternative1";
1	hq_isoforms.fasta.no5merge.collapsed.gff	exon	11843275	11843439	.	-	.	gene_id "SE:1:11838841-11843275:11843439-11844082:-"; transcript_id "SE:1:11838841-11843275:11843439-11844082:-:alternative1";
1	hq_isoforms.fasta.no5merge.collapsed.gff	exon	11844082	11844182	.	-	.	gene_id "SE:1:11838841-11843275:11843439-11844082:-"; transcript_id "SE:1:11838841-11843275:11843439-11844082:-:alternative1";
1	hq_isoforms.fasta.no5merge.collapsed.gff	exon	11853999	11854099	.	-	.	gene_id "SE:1:11854099-11868555:11868631-11880255:-"; transcript_id "SE:1:11854099-11868555:11868631-11880255:-:alternative2";
1	hq_isoforms.fasta.no5merge.collapsed.gff	exon	11880255	11880355	.	-	.	gene_id "SE:1:11854099-11868555:11868631-11880255:-"; transcript_id "SE:1:11854099-11868555:11868631-11880255:-:alternative2";
1	hq_isoforms.fasta.no5merge.collapsed.gff	exon	11853999	11854099	.	-	.	gene_id "SE:1:11854099-11868555:11868631-11880255:-"; transcript_id "SE:1:11854099-11868555:11868631-11880255:-:alternative1";
1	hq_isoforms.fasta.no5merge.collapsed.gff	exon	11868555	11868631	.	-	.	gene_id "SE:1:11854099-11868555:11868631-11880255:-"; transcript_id "SE:1:11854099-11868555:11868631-11880255:-:alternative1";
1	hq_isoforms.fasta.no5merge.collapsed.gff	exon	11880255	11880355	.	-	.	gene_id "SE:1:11854099-11868555:11868631-11880255:-"; transcript_id "SE:1:11854099-11868555:11868631-11880255:-:alternative1";
1	hq_isoforms.fasta.no5merge.collapsed.gff	exon	11980129	11980229	.	-	.	gene_id "SE:1:11980229-11989229:11989327-11989433:-"; transcript_id "SE:1:11980229-11989229:11989327-11989433:-:alternative2";
1	hq_isoforms.fasta.no5merge.collapsed.gff	exon	11989433	11989533	.	-	.	gene_id "SE:1:11980229-11989229:11989327-11989433:-"; transcript_id "SE:1:11980229-11989229:11989327-11989433:-:alternative2";
1	hq_isoforms.fasta.no5merge.collapsed.gff	exon	11980129	11980229	.	-	.	gene_id "SE:1:11980229-11989229:11989327-11989433:-"; transcript_id "SE:1:11980229-11989229:11989327-11989433:-:alternative1";
1	hq_isoforms.fasta.no5merge.collapsed.gff	exon	11989229	11989327	.	-	.	gene_id "SE:1:11980229-11989229:11989327-11989433:-"; transcript_id "SE:1:11980229-11989229:11989327-11989433:-:alternative1";
1	hq_isoforms.fasta.no5merge.collapsed.gff	exon	11989433	11989533	.	-	.	gene_id "SE:1:11980229-11989229:11989327-11989433:-"; transcript_id "SE:1:11980229-11989229:11989327-11989433:-:alternative1";
1	hq_isoforms.fasta.no5merge.collapsed.gff	exon	12105846	12105946	.	-	.	gene_id "SE:1:12105946-12106843:12106934-12107784:-"; transcript_id "SE:1:12105946-12106843:12106934-12107784:-:alternative2";
1	hq_isoforms.fasta.no5merge.collapsed.gff	exon	12107784	12107884	.	-	.	gene_id "SE:1:12105946-12106843:12106934-12107784:-"; transcript_id "SE:1:12105946-12106843:12106934-12107784:-:alternative2";
1	hq_isoforms.fasta.no5merge.collapsed.gff	exon	12105846	12105946	.	-	.	gene_id "SE:1:12105946-12106843:12106934-12107784:-"; transcript_id "SE:1:12105946-12106843:12106934-12107784:-:alternative1";
1	hq_isoforms.fasta.no5merge.collapsed.gff	exon	12106843	12106934	.	-	.	gene_id "SE:1:12105946-12106843:12106934-12107784:-"; transcript_id "SE:1:12105946-12106843:12106934-12107784:-:alternative1";
1	hq_isoforms.fasta.no5merge.collapsed.gff	exon	12107784	12107884	.	-	.	gene_id "SE:1:12105946-12106843:12106934-12107784:-"; transcript_id "SE:1:12105946-12106843:12106934-12107784:-:alternative1";
1	hq_isoforms.fasta.no5merge.collapsed.gff	exon	12437034	12437134	.	-	.	gene_id "SE:1:12437134-12443372:12443482-12449209:-"; transcript_id "SE:1:12437134-12443372:12443482-12449209:-:alternative2";
1	hq_isoforms.fasta.no5merge.collapsed.gff	exon	12449209	12449309	.	-	.	gene_id "SE:1:12437134-12443372:12443482-12449209:-"; transcript_id "SE:1:12437134-12443372:12443482-12449209:-:alternative2";
1	hq_isoforms.fasta.no5merge.collapsed.gff	exon	12437034	12437134	.	-	.	gene_id "SE:1:12437134-12443372:12443482-12449209:-"; transcript_id "SE:1:12437134-12443372:12443482-12449209:-:alternative1";
1	hq_isoforms.fasta.no5merge.collapsed.gff	exon	12443372	12443482	.	-	.	gene_id "SE:1:12437134-12443372:12443482-12449209:-"; transcript_id "SE:1:12437134-12443372:12443482-12449209:-:alternative1";
1	hq_isoforms.fasta.no5merge.collapsed.gff	exon	12449209	12449309	.	-	.	gene_id "SE:1:12437134-12443372:12443482-12449209:-"; transcript_id "SE:1:12437134-12443372:12443482-12449209:-:alternative1";
1	hq_isoforms.fasta.no5merge.collapsed.gff	exon	12456657	12456757	.	-	.	gene_id "SE:1:12456757-12461416:12461421-12466361:-"; transcript_id "SE:1:12456757-12461416:12461421-12466361:-:alternative2";
1	hq_isoforms.fasta.no5merge.collapsed.gff	exon	12466361	12466461	.	-	.	gene_id "SE:1:12456757-12461416:12461421-12466361:-"; transcript_id "SE:1:12456757-12461416:12461421-12466361:-:alternative2";
1	hq_isoforms.fasta.no5merge.collapsed.gff	exon	12456657	12456757	.	-	.	gene_id "SE:1:12456757-12461416:12461421-12466361:-"; transcript_id "SE:1:12456757-12461416:12461421-12466361:-:alternative1";
1	hq_isoforms.fasta.no5merge.collapsed.gff	exon	12461416	12461421	.	-	.	gene_id "SE:1:12456757-12461416:12461421-12466361:-"; transcript_id "SE:1:12456757-12461416:12461421-12466361:-:alternative1";
1	hq_isoforms.fasta.no5merge.collapsed.gff	exon	12466361	12466461	.	-	.	gene_id "SE:1:12456757-12461416:12461421-12466361:-"; transcript_id "SE:1:12456757-12461416:12461421-12466361:-:alternative1";
1	hq_isoforms.fasta.no5merge.collapsed.gff	exon	12456657	12456757	.	-	.	gene_id "SE:1:12456757-12461416:12461551-12466361:-"; transcript_id "SE:1:12456757-12461416:12461551-12466361:-:alternative2";
1	hq_isoforms.fasta.no5merge.collapsed.gff	exon	12466361	12466461	.	-	.	gene_id "SE:1:12456757-12461416:12461551-12466361:-"; transcript_id "SE:1:12456757-12461416:12461551-12466361:-:alternative2";
1	hq_isoforms.fasta.no5merge.collapsed.gff	exon	12456657	12456757	.	-	.	gene_id "SE:1:12456757-12461416:12461551-12466361:-"; transcript_id "SE:1:12456757-12461416:12461551-12466361:-:alternative1";
1	hq_isoforms.fasta.no5merge.collapsed.gff	exon	12461416	12461551	.	-	.	gene_id "SE:1:12456757-12461416:12461551-12466361:-"; transcript_id "SE:1:12456757-12461416:12461551-12466361:-:alternative1";
1	hq_isoforms.fasta.no5merge.collapsed.gff	exon	12466361	12466461	.	-	.	gene_id "SE:1:12456757-12461416:12461551-12466361:-"; transcript_id "SE:1:12456757-12461416:12461551-12466361:-:alternative1";
1	hq_isoforms.fasta.no5merge.collapsed.gff	exon	12837430	12837530	.	-	.	gene_id "SE:1:12837530-12839046:12839172-12839353:-"; transcript_id "SE:1:12837530-12839046:12839172-12839353:-:alternative2";
1	hq_isoforms.fasta.no5merge.collapsed.gff	exon	12839353	12839453	.	-	.	gene_id "SE:1:12837530-12839046:12839172-12839353:-"; transcript_id "SE:1:12837530-12839046:12839172-12839353:-:alternative2";
1	hq_isoforms.fasta.no5merge.collapsed.gff	exon	12837430	12837530	.	-	.	gene_id "SE:1:12837530-12839046:12839172-12839353:-"; transcript_id "SE:1:12837530-12839046:12839172-12839353:-:alternative1";
1	hq_isoforms.fasta.no5merge.collapsed.gff	exon	12839046	12839172	.	-	.	gene_id "SE:1:12837530-12839046:12839172-12839353:-"; transcript_id "SE:1:12837530-12839046:12839172-12839353:-:alternative1";
1	hq_isoforms.fasta.no5merge.collapsed.gff	exon	12839353	12839453	.	-	.	gene_id "SE:1:12837530-12839046:12839172-12839353:-"; transcript_id "SE:1:12837530-12839046:12839172-12839353:-:alternative1";
1	hq_isoforms.fasta.no5merge.collapsed.gff	exon	12831116	12831216	.	-	.	gene_id "SE:1:12831216-12833016:12833188-12835877:-"; transcript_id "SE:1:12831216-12833016:12833188-12835877:-:alternative2";
1	hq_isoforms.fasta.no5merge.collapsed.gff	exon	12835877	12835977	.	-	.	gene_id "SE:1:12831216-12833016:12833188-12835877:-"; transcript_id "SE:1:12831216-12833016:12833188-12835877:-:alternative2";
1	hq_isoforms.fasta.no5merge.collapsed.gff	exon	12831116	12831216	.	-	.	gene_id "SE:1:12831216-12833016:12833188-12835877:-"; transcript_id "SE:1:12831216-12833016:12833188-12835877:-:alternative1";
1	hq_isoforms.fasta.no5merge.collapsed.gff	exon	12833016	12833188	.	-	.	gene_id "SE:1:12831216-12833016:12833188-12835877:-"; transcript_id "SE:1:12831216-12833016:12833188-12835877:-:alternative1";
1	hq_isoforms.fasta.no5merge.collapsed.gff	exon	12835877	12835977	.	-	.	gene_id "SE:1:12831216-12833016:12833188-12835877:-"; transcript_id "SE:1:12831216-12833016:12833188-12835877:-:alternative1";
1	hq_isoforms.fasta.no5merge.collapsed.gff	exon	13268851	13268951	.	-	.	gene_id "SE:1:13268951-13272691:13272783-13273498:-"; transcript_id "SE:1:13268951-13272691:13272783-13273498:-:alternative2";
1	hq_isoforms.fasta.no5merge.collapsed.gff	exon	13273498	13273598	.	-	.	gene_id "SE:1:13268951-13272691:13272783-13273498:-"; transcript_id "SE:1:13268951-13272691:13272783-13273498:-:alternative2";
1	hq_isoforms.fasta.no5merge.collapsed.gff	exon	13268851	13268951	.	-	.	gene_id "SE:1:13268951-13272691:13272783-13273498:-"; transcript_id "SE:1:13268951-13272691:13272783-13273498:-:alternative1";
1	hq_isoforms.fasta.no5merge.collapsed.gff	exon	13272691	13272783	.	-	.	gene_id "SE:1:13268951-13272691:13272783-13273498:-"; transcript_id "SE:1:13268951-13272691:13272783-13273498:-:alternative1";
1	hq_isoforms.fasta.no5merge.collapsed.gff	exon	13273498	13273598	.	-	.	gene_id "SE:1:13268951-13272691:13272783-13273498:-"; transcript_id "SE:1:13268951-13272691:13272783-13273498:-:alternative1";
1	hq_isoforms.fasta.no5merge.collapsed.gff	exon	13268851	13268951	.	-	.	gene_id "SE:1:13268951-13272164:13272256-13273498:-"; transcript_id "SE:1:13268951-13272164:13272256-13273498:-:alternative2";
1	hq_isoforms.fasta.no5merge.collapsed.gff	exon	13273498	13273598	.	-	.	gene_id "SE:1:13268951-13272164:13272256-13273498:-"; transcript_id "SE:1:13268951-13272164:13272256-13273498:-:alternative2";
1	hq_isoforms.fasta.no5merge.collapsed.gff	exon	13268851	13268951	.	-	.	gene_id "SE:1:13268951-13272164:13272256-13273498:-"; transcript_id "SE:1:13268951-13272164:13272256-13273498:-:alternative1";
1	hq_isoforms.fasta.no5merge.collapsed.gff	exon	13272164	13272256	.	-	.	gene_id "SE:1:13268951-13272164:13272256-13273498:-"; transcript_id "SE:1:13268951-13272164:13272256-13273498:-:alternative1";
1	hq_isoforms.fasta.no5merge.collapsed.gff	exon	13273498	13273598	.	-	.	gene_id "SE:1:13268951-13272164:13272256-13273498:-"; transcript_id "SE:1:13268951-13272164:13272256-13273498:-:alternative1";
1	hq_isoforms.fasta.no5merge.collapsed.gff	exon	13483610	13483710	.	-	.	gene_id "SE:1:13483710-13486940:13487061-13488253:-"; transcript_id "SE:1:13483710-13486940:13487061-13488253:-:alternative2";
1	hq_isoforms.fasta.no5merge.collapsed.gff	exon	13488253	13488353	.	-	.	gene_id "SE:1:13483710-13486940:13487061-13488253:-"; transcript_id "SE:1:13483710-13486940:13487061-13488253:-:alternative2";
1	hq_isoforms.fasta.no5merge.collapsed.gff	exon	13483610	13483710	.	-	.	gene_id "SE:1:13483710-13486940:13487061-13488253:-"; transcript_id "SE:1:13483710-13486940:13487061-13488253:-:alternative1";
1	hq_isoforms.fasta.no5merge.collapsed.gff	exon	13486940	13487061	.	-	.	gene_id "SE:1:13483710-13486940:13487061-13488253:-"; transcript_id "SE:1:13483710-13486940:13487061-13488253:-:alternative1";
1	hq_isoforms.fasta.no5merge.collapsed.gff	exon	13488253	13488353	.	-	.	gene_id "SE:1:13483710-13486940:13487061-13488253:-"; transcript_id "SE:1:13483710-13486940:13487061-13488253:-:alternative1";
1	hq_isoforms.fasta.no5merge.collapsed.gff	exon	13497000	13497100	.	-	.	gene_id "SE:1:13497100-13502249:13502382-13505162:-"; transcript_id "SE:1:13497100-13502249:13502382-13505162:-:alternative2";
1	hq_isoforms.fasta.no5merge.collapsed.gff	exon	13505162	13505262	.	-	.	gene_id "SE:1:13497100-13502249:13502382-13505162:-"; transcript_id "SE:1:13497100-13502249:13502382-13505162:-:alternative2";
1	hq_isoforms.fasta.no5merge.collapsed.gff	exon	13497000	13497100	.	-	.	gene_id "SE:1:13497100-13502249:13502382-13505162:-"; transcript_id "SE:1:13497100-13502249:13502382-13505162:-:alternative1";
1	hq_isoforms.fasta.no5merge.collapsed.gff	exon	13502249	13502382	.	-	.	gene_id "SE:1:13497100-13502249:13502382-13505162:-"; transcript_id "SE:1:13497100-13502249:13502382-13505162:-:alternative1";
1	hq_isoforms.fasta.no5merge.collapsed.gff	exon	13505162	13505262	.	-	.	gene_id "SE:1:13497100-13502249:13502382-13505162:-"; transcript_id "SE:1:13497100-13502249:13502382-13505162:-:alternative1";
1	hq_isoforms.fasta.no5merge.collapsed.gff	exon	13505284	13505384	.	-	.	gene_id "SE:1:13505384-13510984:13511073-13511413:-"; transcript_id "SE:1:13505384-13510984:13511073-13511413:-:alternative2";
1	hq_isoforms.fasta.no5merge.collapsed.gff	exon	13511413	13511513	.	-	.	gene_id "SE:1:13505384-13510984:13511073-13511413:-"; transcript_id "SE:1:13505384-13510984:13511073-13511413:-:alternative2";
1	hq_isoforms.fasta.no5merge.collapsed.gff	exon	13505284	13505384	.	-	.	gene_id "SE:1:13505384-13510984:13511073-13511413:-"; transcript_id "SE:1:13505384-13510984:13511073-13511413:-:alternative1";
1	hq_isoforms.fasta.no5merge.collapsed.gff	exon	13510984	13511073	.	-	.	gene_id "SE:1:13505384-13510984:13511073-13511413:-"; transcript_id "SE:1:13505384-13510984:13511073-13511413:-:alternative1";
1	hq_isoforms.fasta.no5merge.collapsed.gff	exon	13511413	13511513	.	-	.	gene_id "SE:1:13505384-13510984:13511073-13511413:-"; transcript_id "SE:1:13505384-13510984:13511073-13511413:-:alternative1";
1	hq_isoforms.fasta.no5merge.collapsed.gff	exon	13716978	13717078	.	-	.	gene_id "SE:1:13717078-13718729:13719045-13727231:-"; transcript_id "SE:1:13717078-13718729:13719045-13727231:-:alternative2";
1	hq_isoforms.fasta.no5merge.collapsed.gff	exon	13727231	13727331	.	-	.	gene_id "SE:1:13717078-13718729:13719045-13727231:-"; transcript_id "SE:1:13717078-13718729:13719045-13727231:-:alternative2";
1	hq_isoforms.fasta.no5merge.collapsed.gff	exon	13716978	13717078	.	-	.	gene_id "SE:1:13717078-13718729:13719045-13727231:-"; transcript_id "SE:1:13717078-13718729:13719045-13727231:-:alternative1";
1	hq_isoforms.fasta.no5merge.collapsed.gff	exon	13718729	13719045	.	-	.	gene_id "SE:1:13717078-13718729:13719045-13727231:-"; transcript_id "SE:1:13717078-13718729:13719045-13727231:-:alternative1";
1	hq_isoforms.fasta.no5merge.collapsed.gff	exon	13727231	13727331	.	-	.	gene_id "SE:1:13717078-13718729:13719045-13727231:-"; transcript_id "SE:1:13717078-13718729:13719045-13727231:-:alternative1";
1	hq_isoforms.fasta.no5merge.collapsed.gff	exon	13702089	13702189	.	-	.	gene_id "SE:1:13702189-13704968:13704985-13707849:-"; transcript_id "SE:1:13702189-13704968:13704985-13707849:-:alternative2";
1	hq_isoforms.fasta.no5merge.collapsed.gff	exon	13707849	13707949	.	-	.	gene_id "SE:1:13702189-13704968:13704985-13707849:-"; transcript_id "SE:1:13702189-13704968:13704985-13707849:-:alternative2";
1	hq_isoforms.fasta.no5merge.collapsed.gff	exon	13702089	13702189	.	-	.	gene_id "SE:1:13702189-13704968:13704985-13707849:-"; transcript_id "SE:1:13702189-13704968:13704985-13707849:-:alternative1";
1	hq_isoforms.fasta.no5merge.collapsed.gff	exon	13704968	13704985	.	-	.	gene_id "SE:1:13702189-13704968:13704985-13707849:-"; transcript_id "SE:1:13702189-13704968:13704985-13707849:-:alternative1";
1	hq_isoforms.fasta.no5merge.collapsed.gff	exon	13707849	13707949	.	-	.	gene_id "SE:1:13702189-13704968:13704985-13707849:-"; transcript_id "SE:1:13702189-13704968:13704985-13707849:-:alternative1";
1	hq_isoforms.fasta.no5merge.collapsed.gff	exon	13942007	13942107	.	-	.	gene_id "SE:1:13942107-13959012:13959062-13969975:-"; transcript_id "SE:1:13942107-13959012:13959062-13969975:-:alternative2";
1	hq_isoforms.fasta.no5merge.collapsed.gff	exon	13969975	13970075	.	-	.	gene_id "SE:1:13942107-13959012:13959062-13969975:-"; transcript_id "SE:1:13942107-13959012:13959062-13969975:-:alternative2";
1	hq_isoforms.fasta.no5merge.collapsed.gff	exon	13942007	13942107	.	-	.	gene_id "SE:1:13942107-13959012:13959062-13969975:-"; transcript_id "SE:1:13942107-13959012:13959062-13969975:-:alternative1";
1	hq_isoforms.fasta.no5merge.collapsed.gff	exon	13959012	13959062	.	-	.	gene_id "SE:1:13942107-13959012:13959062-13969975:-"; transcript_id "SE:1:13942107-13959012:13959062-13969975:-:alternative1";
1	hq_isoforms.fasta.no5merge.collapsed.gff	exon	13969975	13970075	.	-	.	gene_id "SE:1:13942107-13959012:13959062-13969975:-"; transcript_id "SE:1:13942107-13959012:13959062-13969975:-:alternative1";
1	hq_isoforms.fasta.no5merge.collapsed.gff	exon	15748776	15748876	.	-	.	gene_id "SE:1:15748876-15749735:15749996-15753478:-"; transcript_id "SE:1:15748876-15749735:15749996-15753478:-:alternative2";
1	hq_isoforms.fasta.no5merge.collapsed.gff	exon	15753478	15753578	.	-	.	gene_id "SE:1:15748876-15749735:15749996-15753478:-"; transcript_id "SE:1:15748876-15749735:15749996-15753478:-:alternative2";
1	hq_isoforms.fasta.no5merge.collapsed.gff	exon	15748776	15748876	.	-	.	gene_id "SE:1:15748876-15749735:15749996-15753478:-"; transcript_id "SE:1:15748876-15749735:15749996-15753478:-:alternative1";
1	hq_isoforms.fasta.no5merge.collapsed.gff	exon	15749735	15749996	.	-	.	gene_id "SE:1:15748876-15749735:15749996-15753478:-"; transcript_id "SE:1:15748876-15749735:15749996-15753478:-:alternative1";
1	hq_isoforms.fasta.no5merge.collapsed.gff	exon	15753478	15753578	.	-	.	gene_id "SE:1:15748876-15749735:15749996-15753478:-"; transcript_id "SE:1:15748876-15749735:15749996-15753478:-:alternative1";
1	hq_isoforms.fasta.no5merge.collapsed.gff	exon	15748776	15748876	.	-	.	gene_id "SE:1:15748876-15749458:15749565-15753478:-"; transcript_id "SE:1:15748876-15749458:15749565-15753478:-:alternative2";
1	hq_isoforms.fasta.no5merge.collapsed.gff	exon	15753478	15753578	.	-	.	gene_id "SE:1:15748876-15749458:15749565-15753478:-"; transcript_id "SE:1:15748876-15749458:15749565-15753478:-:alternative2";
1	hq_isoforms.fasta.no5merge.collapsed.gff	exon	15748776	15748876	.	-	.	gene_id "SE:1:15748876-15749458:15749565-15753478:-"; transcript_id "SE:1:15748876-15749458:15749565-15753478:-:alternative1";
1	hq_isoforms.fasta.no5merge.collapsed.gff	exon	15749458	15749565	.	-	.	gene_id "SE:1:15748876-15749458:15749565-15753478:-"; transcript_id "SE:1:15748876-15749458:15749565-15753478:-:alternative1";
1	hq_isoforms.fasta.no5merge.collapsed.gff	exon	15753478	15753578	.	-	.	gene_id "SE:1:15748876-15749458:15749565-15753478:-"; transcript_id "SE:1:15748876-15749458:15749565-15753478:-:alternative1";
1	hq_isoforms.fasta.no5merge.collapsed.gff	exon	18686493	18686593	.	-	.	gene_id "SE:1:18686593-18702516:18703004-18706129:-"; transcript_id "SE:1:18686593-18702516:18703004-18706129:-:alternative2";
1	hq_isoforms.fasta.no5merge.collapsed.gff	exon	18706129	18706229	.	-	.	gene_id "SE:1:18686593-18702516:18703004-18706129:-"; transcript_id "SE:1:18686593-18702516:18703004-18706129:-:alternative2";
1	hq_isoforms.fasta.no5merge.collapsed.gff	exon	18686493	18686593	.	-	.	gene_id "SE:1:18686593-18702516:18703004-18706129:-"; transcript_id "SE:1:18686593-18702516:18703004-18706129:-:alternative1";
1	hq_isoforms.fasta.no5merge.collapsed.gff	exon	18702516	18703004	.	-	.	gene_id "SE:1:18686593-18702516:18703004-18706129:-"; transcript_id "SE:1:18686593-18702516:18703004-18706129:-:alternative1";
1	hq_isoforms.fasta.no5merge.collapsed.gff	exon	18706129	18706229	.	-	.	gene_id "SE:1:18686593-18702516:18703004-18706129:-"; transcript_id "SE:1:18686593-18702516:18703004-18706129:-:alternative1";
1	hq_isoforms.fasta.no5merge.collapsed.gff	exon	18686493	18686593	.	-	.	gene_id "SE:1:18686593-18691057:18691318-18702516:-"; transcript_id "SE:1:18686593-18691057:18691318-18702516:-:alternative2";
1	hq_isoforms.fasta.no5merge.collapsed.gff	exon	18702516	18702616	.	-	.	gene_id "SE:1:18686593-18691057:18691318-18702516:-"; transcript_id "SE:1:18686593-18691057:18691318-18702516:-:alternative2";
1	hq_isoforms.fasta.no5merge.collapsed.gff	exon	18686493	18686593	.	-	.	gene_id "SE:1:18686593-18691057:18691318-18702516:-"; transcript_id "SE:1:18686593-18691057:18691318-18702516:-:alternative1";
1	hq_isoforms.fasta.no5merge.collapsed.gff	exon	18691057	18691318	.	-	.	gene_id "SE:1:18686593-18691057:18691318-18702516:-"; transcript_id "SE:1:18686593-18691057:18691318-18702516:-:alternative1";
1	hq_isoforms.fasta.no5merge.collapsed.gff	exon	18702516	18702616	.	-	.	gene_id "SE:1:18686593-18691057:18691318-18702516:-"; transcript_id "SE:1:18686593-18691057:18691318-18702516:-:alternative1";
1	hq_isoforms.fasta.no5merge.collapsed.gff	exon	20414231	20414331	.	-	.	gene_id "SE:1:20414331-20414533:20414903-20415519:-"; transcript_id "SE:1:20414331-20414533:20414903-20415519:-:alternative2";
1	hq_isoforms.fasta.no5merge.collapsed.gff	exon	20415519	20415619	.	-	.	gene_id "SE:1:20414331-20414533:20414903-20415519:-"; transcript_id "SE:1:20414331-20414533:20414903-20415519:-:alternative2";
1	hq_isoforms.fasta.no5merge.collapsed.gff	exon	20414231	20414331	.	-	.	gene_id "SE:1:20414331-20414533:20414903-20415519:-"; transcript_id "SE:1:20414331-20414533:20414903-20415519:-:alternative1";
1	hq_isoforms.fasta.no5merge.collapsed.gff	exon	20414533	20414903	.	-	.	gene_id "SE:1:20414331-20414533:20414903-20415519:-"; transcript_id "SE:1:20414331-20414533:20414903-20415519:-:alternative1";
1	hq_isoforms.fasta.no5merge.collapsed.gff	exon	20415519	20415619	.	-	.	gene_id "SE:1:20414331-20414533:20414903-20415519:-"; transcript_id "SE:1:20414331-20414533:20414903-20415519:-:alternative1";
1	hq_isoforms.fasta.no5merge.collapsed.gff	exon	20754118	20754218	.	-	.	gene_id "SE:1:20754218-20824539:20824638-20834557:-"; transcript_id "SE:1:20754218-20824539:20824638-20834557:-:alternative2";
1	hq_isoforms.fasta.no5merge.collapsed.gff	exon	20834557	20834657	.	-	.	gene_id "SE:1:20754218-20824539:20824638-20834557:-"; transcript_id "SE:1:20754218-20824539:20824638-20834557:-:alternative2";
1	hq_isoforms.fasta.no5merge.collapsed.gff	exon	20754118	20754218	.	-	.	gene_id "SE:1:20754218-20824539:20824638-20834557:-"; transcript_id "SE:1:20754218-20824539:20824638-20834557:-:alternative1";
1	hq_isoforms.fasta.no5merge.collapsed.gff	exon	20824539	20824638	.	-	.	gene_id "SE:1:20754218-20824539:20824638-20834557:-"; transcript_id "SE:1:20754218-20824539:20824638-20834557:-:alternative1";
1	hq_isoforms.fasta.no5merge.collapsed.gff	exon	20834557	20834657	.	-	.	gene_id "SE:1:20754218-20824539:20824638-20834557:-"; transcript_id "SE:1:20754218-20824539:20824638-20834557:-:alternative1";
1	hq_isoforms.fasta.no5merge.collapsed.gff	exon	20754118	20754218	.	-	.	gene_id "SE:1:20754218-20824539:20824641-20834557:-"; transcript_id "SE:1:20754218-20824539:20824641-20834557:-:alternative2";
1	hq_isoforms.fasta.no5merge.collapsed.gff	exon	20834557	20834657	.	-	.	gene_id "SE:1:20754218-20824539:20824641-20834557:-"; transcript_id "SE:1:20754218-20824539:20824641-20834557:-:alternative2";
1	hq_isoforms.fasta.no5merge.collapsed.gff	exon	20754118	20754218	.	-	.	gene_id "SE:1:20754218-20824539:20824641-20834557:-"; transcript_id "SE:1:20754218-20824539:20824641-20834557:-:alternative1";
1	hq_isoforms.fasta.no5merge.collapsed.gff	exon	20824539	20824641	.	-	.	gene_id "SE:1:20754218-20824539:20824641-20834557:-"; transcript_id "SE:1:20754218-20824539:20824641-20834557:-:alternative1";
1	hq_isoforms.fasta.no5merge.collapsed.gff	exon	20834557	20834657	.	-	.	gene_id "SE:1:20754218-20824539:20824641-20834557:-"; transcript_id "SE:1:20754218-20824539:20824641-20834557:-:alternative1";
1	hq_isoforms.fasta.no5merge.collapsed.gff	exon	23217136	23217236	.	-	.	gene_id "SE:1:23217236-23218766:23218849-23219584:-"; transcript_id "SE:1:23217236-23218766:23218849-23219584:-:alternative2";
1	hq_isoforms.fasta.no5merge.collapsed.gff	exon	23219584	23219684	.	-	.	gene_id "SE:1:23217236-23218766:23218849-23219584:-"; transcript_id "SE:1:23217236-23218766:23218849-23219584:-:alternative2";
1	hq_isoforms.fasta.no5merge.collapsed.gff	exon	23217136	23217236	.	-	.	gene_id "SE:1:23217236-23218766:23218849-23219584:-"; transcript_id "SE:1:23217236-23218766:23218849-23219584:-:alternative1";
1	hq_isoforms.fasta.no5merge.collapsed.gff	exon	23218766	23218849	.	-	.	gene_id "SE:1:23217236-23218766:23218849-23219584:-"; transcript_id "SE:1:23217236-23218766:23218849-23219584:-:alternative1";
1	hq_isoforms.fasta.no5merge.collapsed.gff	exon	23219584	23219684	.	-	.	gene_id "SE:1:23217236-23218766:23218849-23219584:-"; transcript_id "SE:1:23217236-23218766:23218849-23219584:-:alternative1";
1	hq_isoforms.fasta.no5merge.collapsed.gff	exon	23225210	23225310	.	-	.	gene_id "SE:1:23225310-23225474:23225494-23227881:-"; transcript_id "SE:1:23225310-23225474:23225494-23227881:-:alternative2";
1	hq_isoforms.fasta.no5merge.collapsed.gff	exon	23227881	23227981	.	-	.	gene_id "SE:1:23225310-23225474:23225494-23227881:-"; transcript_id "SE:1:23225310-23225474:23225494-23227881:-:alternative2";
1	hq_isoforms.fasta.no5merge.collapsed.gff	exon	23225210	23225310	.	-	.	gene_id "SE:1:23225310-23225474:23225494-23227881:-"; transcript_id "SE:1:23225310-23225474:23225494-23227881:-:alternative1";
1	hq_isoforms.fasta.no5merge.collapsed.gff	exon	23225474	23225494	.	-	.	gene_id "SE:1:23225310-23225474:23225494-23227881:-"; transcript_id "SE:1:23225310-23225474:23225494-23227881:-:alternative1";
1	hq_isoforms.fasta.no5merge.collapsed.gff	exon	23227881	23227981	.	-	.	gene_id "SE:1:23225310-23225474:23225494-23227881:-"; transcript_id "SE:1:23225310-23225474:23225494-23227881:-:alternative1";
1	hq_isoforms.fasta.no5merge.collapsed.gff	exon	23698547	23698647	.	-	.	gene_id "SE:1:23698647-23702967:23703136-23704441:-"; transcript_id "SE:1:23698647-23702967:23703136-23704441:-:alternative2";
1	hq_isoforms.fasta.no5merge.collapsed.gff	exon	23704441	23704541	.	-	.	gene_id "SE:1:23698647-23702967:23703136-23704441:-"; transcript_id "SE:1:23698647-23702967:23703136-23704441:-:alternative2";
1	hq_isoforms.fasta.no5merge.collapsed.gff	exon	23698547	23698647	.	-	.	gene_id "SE:1:23698647-23702967:23703136-23704441:-"; transcript_id "SE:1:23698647-23702967:23703136-23704441:-:alternative1";
1	hq_isoforms.fasta.no5merge.collapsed.gff	exon	23702967	23703136	.	-	.	gene_id "SE:1:23698647-23702967:23703136-23704441:-"; transcript_id "SE:1:23698647-23702967:23703136-23704441:-:alternative1";
1	hq_isoforms.fasta.no5merge.collapsed.gff	exon	23704441	23704541	.	-	.	gene_id "SE:1:23698647-23702967:23703136-23704441:-"; transcript_id "SE:1:23698647-23702967:23703136-23704441:-:alternative1";
1	hq_isoforms.fasta.no5merge.collapsed.gff	exon	23760731	23760831	.	-	.	gene_id "SE:1:23760831-23760932:23761319-23771099:-"; transcript_id "SE:1:23760831-23760932:23761319-23771099:-:alternative2";
1	hq_isoforms.fasta.no5merge.collapsed.gff	exon	23771099	23771199	.	-	.	gene_id "SE:1:23760831-23760932:23761319-23771099:-"; transcript_id "SE:1:23760831-23760932:23761319-23771099:-:alternative2";
1	hq_isoforms.fasta.no5merge.collapsed.gff	exon	23760731	23760831	.	-	.	gene_id "SE:1:23760831-23760932:23761319-23771099:-"; transcript_id "SE:1:23760831-23760932:23761319-23771099:-:alternative1";
1	hq_isoforms.fasta.no5merge.collapsed.gff	exon	23760932	23761319	.	-	.	gene_id "SE:1:23760831-23760932:23761319-23771099:-"; transcript_id "SE:1:23760831-23760932:23761319-23771099:-:alternative1";
1	hq_isoforms.fasta.no5merge.collapsed.gff	exon	23771099	23771199	.	-	.	gene_id "SE:1:23760831-23760932:23761319-23771099:-"; transcript_id "SE:1:23760831-23760932:23761319-23771099:-:alternative1";
1	hq_isoforms.fasta.no5merge.collapsed.gff	exon	23696256	23696356	.	-	.	gene_id "SE:1:23696356-23698198:23698242-23698580:-"; transcript_id "SE:1:23696356-23698198:23698242-23698580:-:alternative2";
1	hq_isoforms.fasta.no5merge.collapsed.gff	exon	23698580	23698680	.	-	.	gene_id "SE:1:23696356-23698198:23698242-23698580:-"; transcript_id "SE:1:23696356-23698198:23698242-23698580:-:alternative2";
1	hq_isoforms.fasta.no5merge.collapsed.gff	exon	23696256	23696356	.	-	.	gene_id "SE:1:23696356-23698198:23698242-23698580:-"; transcript_id "SE:1:23696356-23698198:23698242-23698580:-:alternative1";
1	hq_isoforms.fasta.no5merge.collapsed.gff	exon	23698198	23698242	.	-	.	gene_id "SE:1:23696356-23698198:23698242-23698580:-"; transcript_id "SE:1:23696356-23698198:23698242-23698580:-:alternative1";
1	hq_isoforms.fasta.no5merge.collapsed.gff	exon	23698580	23698680	.	-	.	gene_id "SE:1:23696356-23698198:23698242-23698580:-"; transcript_id "SE:1:23696356-23698198:23698242-23698580:-:alternative1";
1	hq_isoforms.fasta.no5merge.collapsed.gff	exon	23635315	23635415	.	-	.	gene_id "SE:1:23635415-23635677:23635897-23643660:-"; transcript_id "SE:1:23635415-23635677:23635897-23643660:-:alternative2";
1	hq_isoforms.fasta.no5merge.collapsed.gff	exon	23643660	23643760	.	-	.	gene_id "SE:1:23635415-23635677:23635897-23643660:-"; transcript_id "SE:1:23635415-23635677:23635897-23643660:-:alternative2";
1	hq_isoforms.fasta.no5merge.collapsed.gff	exon	23635315	23635415	.	-	.	gene_id "SE:1:23635415-23635677:23635897-23643660:-"; transcript_id "SE:1:23635415-23635677:23635897-23643660:-:alternative1";
1	hq_isoforms.fasta.no5merge.collapsed.gff	exon	23635677	23635897	.	-	.	gene_id "SE:1:23635415-23635677:23635897-23643660:-"; transcript_id "SE:1:23635415-23635677:23635897-23643660:-:alternative1";
1	hq_isoforms.fasta.no5merge.collapsed.gff	exon	23643660	23643760	.	-	.	gene_id "SE:1:23635415-23635677:23635897-23643660:-"; transcript_id "SE:1:23635415-23635677:23635897-23643660:-:alternative1";
1	hq_isoforms.fasta.no5merge.collapsed.gff	exon	23635797	23635897	.	-	.	gene_id "SE:1:23635897-23643660:23643788-23644205:-"; transcript_id "SE:1:23635897-23643660:23643788-23644205:-:alternative2";
1	hq_isoforms.fasta.no5merge.collapsed.gff	exon	23644205	23644305	.	-	.	gene_id "SE:1:23635897-23643660:23643788-23644205:-"; transcript_id "SE:1:23635897-23643660:23643788-23644205:-:alternative2";
1	hq_isoforms.fasta.no5merge.collapsed.gff	exon	23635797	23635897	.	-	.	gene_id "SE:1:23635897-23643660:23643788-23644205:-"; transcript_id "SE:1:23635897-23643660:23643788-23644205:-:alternative1";
1	hq_isoforms.fasta.no5merge.collapsed.gff	exon	23643660	23643788	.	-	.	gene_id "SE:1:23635897-23643660:23643788-23644205:-"; transcript_id "SE:1:23635897-23643660:23643788-23644205:-:alternative1";
1	hq_isoforms.fasta.no5merge.collapsed.gff	exon	23644205	23644305	.	-	.	gene_id "SE:1:23635897-23643660:23643788-23644205:-"; transcript_id "SE:1:23635897-23643660:23643788-23644205:-:alternative1";
1	hq_isoforms.fasta.no5merge.collapsed.gff	exon	23700886	23700986	.	-	.	gene_id "SE:1:23700986-23701404:23701505-23702967:-"; transcript_id "SE:1:23700986-23701404:23701505-23702967:-:alternative2";
1	hq_isoforms.fasta.no5merge.collapsed.gff	exon	23702967	23703067	.	-	.	gene_id "SE:1:23700986-23701404:23701505-23702967:-"; transcript_id "SE:1:23700986-23701404:23701505-23702967:-:alternative2";
1	hq_isoforms.fasta.no5merge.collapsed.gff	exon	23700886	23700986	.	-	.	gene_id "SE:1:23700986-23701404:23701505-23702967:-"; transcript_id "SE:1:23700986-23701404:23701505-23702967:-:alternative1";
1	hq_isoforms.fasta.no5merge.collapsed.gff	exon	23701404	23701505	.	-	.	gene_id "SE:1:23700986-23701404:23701505-23702967:-"; transcript_id "SE:1:23700986-23701404:23701505-23702967:-:alternative1";
1	hq_isoforms.fasta.no5merge.collapsed.gff	exon	23702967	23703067	.	-	.	gene_id "SE:1:23700986-23701404:23701505-23702967:-"; transcript_id "SE:1:23700986-23701404:23701505-23702967:-:alternative1";
1	hq_isoforms.fasta.no5merge.collapsed.gff	exon	23698547	23698647	.	-	.	gene_id "SE:1:23698647-23700927:23700986-23702967:-"; transcript_id "SE:1:23698647-23700927:23700986-23702967:-:alternative2";
1	hq_isoforms.fasta.no5merge.collapsed.gff	exon	23702967	23703067	.	-	.	gene_id "SE:1:23698647-23700927:23700986-23702967:-"; transcript_id "SE:1:23698647-23700927:23700986-23702967:-:alternative2";
1	hq_isoforms.fasta.no5merge.collapsed.gff	exon	23698547	23698647	.	-	.	gene_id "SE:1:23698647-23700927:23700986-23702967:-"; transcript_id "SE:1:23698647-23700927:23700986-23702967:-:alternative1";
1	hq_isoforms.fasta.no5merge.collapsed.gff	exon	23700927	23700986	.	-	.	gene_id "SE:1:23698647-23700927:23700986-23702967:-"; transcript_id "SE:1:23698647-23700927:23700986-23702967:-:alternative1";
1	hq_isoforms.fasta.no5merge.collapsed.gff	exon	23702967	23703067	.	-	.	gene_id "SE:1:23698647-23700927:23700986-23702967:-"; transcript_id "SE:1:23698647-23700927:23700986-23702967:-:alternative1";
1	hq_isoforms.fasta.no5merge.collapsed.gff	exon	23737576	23737676	.	-	.	gene_id "SE:1:23737676-23757780:23758038-23760645:-"; transcript_id "SE:1:23737676-23757780:23758038-23760645:-:alternative2";
1	hq_isoforms.fasta.no5merge.collapsed.gff	exon	23760645	23760745	.	-	.	gene_id "SE:1:23737676-23757780:23758038-23760645:-"; transcript_id "SE:1:23737676-23757780:23758038-23760645:-:alternative2";
1	hq_isoforms.fasta.no5merge.collapsed.gff	exon	23737576	23737676	.	-	.	gene_id "SE:1:23737676-23757780:23758038-23760645:-"; transcript_id "SE:1:23737676-23757780:23758038-23760645:-:alternative1";
1	hq_isoforms.fasta.no5merge.collapsed.gff	exon	23757780	23758038	.	-	.	gene_id "SE:1:23737676-23757780:23758038-23760645:-"; transcript_id "SE:1:23737676-23757780:23758038-23760645:-:alternative1";
1	hq_isoforms.fasta.no5merge.collapsed.gff	exon	23760645	23760745	.	-	.	gene_id "SE:1:23737676-23757780:23758038-23760645:-"; transcript_id "SE:1:23737676-23757780:23758038-23760645:-:alternative1";
1	hq_isoforms.fasta.no5merge.collapsed.gff	exon	23698547	23698647	.	-	.	gene_id "SE:1:23698647-23700927:23703136-23704441:-"; transcript_id "SE:1:23698647-23700927:23703136-23704441:-:alternative2";
1	hq_isoforms.fasta.no5merge.collapsed.gff	exon	23704441	23704541	.	-	.	gene_id "SE:1:23698647-23700927:23703136-23704441:-"; transcript_id "SE:1:23698647-23700927:23703136-23704441:-:alternative2";
1	hq_isoforms.fasta.no5merge.collapsed.gff	exon	23698547	23698647	.	-	.	gene_id "SE:1:23698647-23700927:23703136-23704441:-"; transcript_id "SE:1:23698647-23700927:23703136-23704441:-:alternative1";
1	hq_isoforms.fasta.no5merge.collapsed.gff	exon	23700927	23703136	.	-	.	gene_id "SE:1:23698647-23700927:23703136-23704441:-"; transcript_id "SE:1:23698647-23700927:23703136-23704441:-:alternative1";
1	hq_isoforms.fasta.no5merge.collapsed.gff	exon	23704441	23704541	.	-	.	gene_id "SE:1:23698647-23700927:23703136-23704441:-"; transcript_id "SE:1:23698647-23700927:23703136-23704441:-:alternative1";
1	hq_isoforms.fasta.no5merge.collapsed.gff	exon	23793856	23793956	.	-	.	gene_id "SE:1:23793956-23795103:23795293-23795637:-"; transcript_id "SE:1:23793956-23795103:23795293-23795637:-:alternative2";
1	hq_isoforms.fasta.no5merge.collapsed.gff	exon	23795637	23795737	.	-	.	gene_id "SE:1:23793956-23795103:23795293-23795637:-"; transcript_id "SE:1:23793956-23795103:23795293-23795637:-:alternative2";
1	hq_isoforms.fasta.no5merge.collapsed.gff	exon	23793856	23793956	.	-	.	gene_id "SE:1:23793956-23795103:23795293-23795637:-"; transcript_id "SE:1:23793956-23795103:23795293-23795637:-:alternative1";
1	hq_isoforms.fasta.no5merge.collapsed.gff	exon	23795103	23795293	.	-	.	gene_id "SE:1:23793956-23795103:23795293-23795637:-"; transcript_id "SE:1:23793956-23795103:23795293-23795637:-:alternative1";
1	hq_isoforms.fasta.no5merge.collapsed.gff	exon	23795637	23795737	.	-	.	gene_id "SE:1:23793956-23795103:23795293-23795637:-"; transcript_id "SE:1:23793956-23795103:23795293-23795637:-:alternative1";
1	hq_isoforms.fasta.no5merge.collapsed.gff	exon	23802717	23802817	.	-	.	gene_id "SE:1:23802817-23802982:23803204-23806640:-"; transcript_id "SE:1:23802817-23802982:23803204-23806640:-:alternative2";
1	hq_isoforms.fasta.no5merge.collapsed.gff	exon	23806640	23806740	.	-	.	gene_id "SE:1:23802817-23802982:23803204-23806640:-"; transcript_id "SE:1:23802817-23802982:23803204-23806640:-:alternative2";
1	hq_isoforms.fasta.no5merge.collapsed.gff	exon	23802717	23802817	.	-	.	gene_id "SE:1:23802817-23802982:23803204-23806640:-"; transcript_id "SE:1:23802817-23802982:23803204-23806640:-:alternative1";
1	hq_isoforms.fasta.no5merge.collapsed.gff	exon	23802982	23803204	.	-	.	gene_id "SE:1:23802817-23802982:23803204-23806640:-"; transcript_id "SE:1:23802817-23802982:23803204-23806640:-:alternative1";
1	hq_isoforms.fasta.no5merge.collapsed.gff	exon	23806640	23806740	.	-	.	gene_id "SE:1:23802817-23802982:23803204-23806640:-"; transcript_id "SE:1:23802817-23802982:23803204-23806640:-:alternative1";
1	hq_isoforms.fasta.no5merge.collapsed.gff	exon	23793856	23793956	.	-	.	gene_id "SE:1:23793956-23795104:23795293-23795637:-"; transcript_id "SE:1:23793956-23795104:23795293-23795637:-:alternative2";
1	hq_isoforms.fasta.no5merge.collapsed.gff	exon	23795637	23795737	.	-	.	gene_id "SE:1:23793956-23795104:23795293-23795637:-"; transcript_id "SE:1:23793956-23795104:23795293-23795637:-:alternative2";
1	hq_isoforms.fasta.no5merge.collapsed.gff	exon	23793856	23793956	.	-	.	gene_id "SE:1:23793956-23795104:23795293-23795637:-"; transcript_id "SE:1:23793956-23795104:23795293-23795637:-:alternative1";
1	hq_isoforms.fasta.no5merge.collapsed.gff	exon	23795104	23795293	.	-	.	gene_id "SE:1:23793956-23795104:23795293-23795637:-"; transcript_id "SE:1:23793956-23795104:23795293-23795637:-:alternative1";
1	hq_isoforms.fasta.no5merge.collapsed.gff	exon	23795637	23795737	.	-	.	gene_id "SE:1:23793956-23795104:23795293-23795637:-"; transcript_id "SE:1:23793956-23795104:23795293-23795637:-:alternative1";
1	hq_isoforms.fasta.no5merge.collapsed.gff	exon	23802717	23802817	.	-	.	gene_id "SE:1:23802817-23802982:23803088-23806640:-"; transcript_id "SE:1:23802817-23802982:23803088-23806640:-:alternative2";
1	hq_isoforms.fasta.no5merge.collapsed.gff	exon	23806640	23806740	.	-	.	gene_id "SE:1:23802817-23802982:23803088-23806640:-"; transcript_id "SE:1:23802817-23802982:23803088-23806640:-:alternative2";
1	hq_isoforms.fasta.no5merge.collapsed.gff	exon	23802717	23802817	.	-	.	gene_id "SE:1:23802817-23802982:23803088-23806640:-"; transcript_id "SE:1:23802817-23802982:23803088-23806640:-:alternative1";
1	hq_isoforms.fasta.no5merge.collapsed.gff	exon	23802982	23803088	.	-	.	gene_id "SE:1:23802817-23802982:23803088-23806640:-"; transcript_id "SE:1:23802817-23802982:23803088-23806640:-:alternative1";
1	hq_isoforms.fasta.no5merge.collapsed.gff	exon	23806640	23806740	.	-	.	gene_id "SE:1:23802817-23802982:23803088-23806640:-"; transcript_id "SE:1:23802817-23802982:23803088-23806640:-:alternative1";
1	hq_isoforms.fasta.no5merge.collapsed.gff	exon	24895273	24895373	.	-	.	gene_id "SE:1:24895373-24896557:24896633-24896772:-"; transcript_id "SE:1:24895373-24896557:24896633-24896772:-:alternative2";
1	hq_isoforms.fasta.no5merge.collapsed.gff	exon	24896772	24896872	.	-	.	gene_id "SE:1:24895373-24896557:24896633-24896772:-"; transcript_id "SE:1:24895373-24896557:24896633-24896772:-:alternative2";
1	hq_isoforms.fasta.no5merge.collapsed.gff	exon	24895273	24895373	.	-	.	gene_id "SE:1:24895373-24896557:24896633-24896772:-"; transcript_id "SE:1:24895373-24896557:24896633-24896772:-:alternative1";
1	hq_isoforms.fasta.no5merge.collapsed.gff	exon	24896557	24896633	.	-	.	gene_id "SE:1:24895373-24896557:24896633-24896772:-"; transcript_id "SE:1:24895373-24896557:24896633-24896772:-:alternative1";
1	hq_isoforms.fasta.no5merge.collapsed.gff	exon	24896772	24896872	.	-	.	gene_id "SE:1:24895373-24896557:24896633-24896772:-"; transcript_id "SE:1:24895373-24896557:24896633-24896772:-:alternative1";
1	hq_isoforms.fasta.no5merge.collapsed.gff	exon	25454202	25454302	.	-	.	gene_id "SE:1:25454302-25458472:25458631-25466562:-"; transcript_id "SE:1:25454302-25458472:25458631-25466562:-:alternative2";
1	hq_isoforms.fasta.no5merge.collapsed.gff	exon	25466562	25466662	.	-	.	gene_id "SE:1:25454302-25458472:25458631-25466562:-"; transcript_id "SE:1:25454302-25458472:25458631-25466562:-:alternative2";
1	hq_isoforms.fasta.no5merge.collapsed.gff	exon	25454202	25454302	.	-	.	gene_id "SE:1:25454302-25458472:25458631-25466562:-"; transcript_id "SE:1:25454302-25458472:25458631-25466562:-:alternative1";
1	hq_isoforms.fasta.no5merge.collapsed.gff	exon	25458472	25458631	.	-	.	gene_id "SE:1:25454302-25458472:25458631-25466562:-"; transcript_id "SE:1:25454302-25458472:25458631-25466562:-:alternative1";
1	hq_isoforms.fasta.no5merge.collapsed.gff	exon	25466562	25466662	.	-	.	gene_id "SE:1:25454302-25458472:25458631-25466562:-"; transcript_id "SE:1:25454302-25458472:25458631-25466562:-:alternative1";
1	hq_isoforms.fasta.no5merge.collapsed.gff	exon	24913007	24913107	.	-	.	gene_id "SE:1:24913107-24913997:24914694-24916956:-"; transcript_id "SE:1:24913107-24913997:24914694-24916956:-:alternative2";
1	hq_isoforms.fasta.no5merge.collapsed.gff	exon	24916956	24917056	.	-	.	gene_id "SE:1:24913107-24913997:24914694-24916956:-"; transcript_id "SE:1:24913107-24913997:24914694-24916956:-:alternative2";
1	hq_isoforms.fasta.no5merge.collapsed.gff	exon	24913007	24913107	.	-	.	gene_id "SE:1:24913107-24913997:24914694-24916956:-"; transcript_id "SE:1:24913107-24913997:24914694-24916956:-:alternative1";
1	hq_isoforms.fasta.no5merge.collapsed.gff	exon	24913997	24914694	.	-	.	gene_id "SE:1:24913107-24913997:24914694-24916956:-"; transcript_id "SE:1:24913107-24913997:24914694-24916956:-:alternative1";
1	hq_isoforms.fasta.no5merge.collapsed.gff	exon	24916956	24917056	.	-	.	gene_id "SE:1:24913107-24913997:24914694-24916956:-"; transcript_id "SE:1:24913107-24913997:24914694-24916956:-:alternative1";
1	hq_isoforms.fasta.no5merge.collapsed.gff	exon	24913007	24913107	.	-	.	gene_id "SE:1:24913107-24913997:24914914-24916956:-"; transcript_id "SE:1:24913107-24913997:24914914-24916956:-:alternative2";
1	hq_isoforms.fasta.no5merge.collapsed.gff	exon	24916956	24917056	.	-	.	gene_id "SE:1:24913107-24913997:24914914-24916956:-"; transcript_id "SE:1:24913107-24913997:24914914-24916956:-:alternative2";
1	hq_isoforms.fasta.no5merge.collapsed.gff	exon	24913007	24913107	.	-	.	gene_id "SE:1:24913107-24913997:24914914-24916956:-"; transcript_id "SE:1:24913107-24913997:24914914-24916956:-:alternative1";
1	hq_isoforms.fasta.no5merge.collapsed.gff	exon	24913997	24914914	.	-	.	gene_id "SE:1:24913107-24913997:24914914-24916956:-"; transcript_id "SE:1:24913107-24913997:24914914-24916956:-:alternative1";
1	hq_isoforms.fasta.no5merge.collapsed.gff	exon	24916956	24917056	.	-	.	gene_id "SE:1:24913107-24913997:24914914-24916956:-"; transcript_id "SE:1:24913107-24913997:24914914-24916956:-:alternative1";
1	hq_isoforms.fasta.no5merge.collapsed.gff	exon	25257249	25257349	.	-	.	gene_id "SE:1:25257349-25258451:25258601-25264739:-"; transcript_id "SE:1:25257349-25258451:25258601-25264739:-:alternative2";
1	hq_isoforms.fasta.no5merge.collapsed.gff	exon	25264739	25264839	.	-	.	gene_id "SE:1:25257349-25258451:25258601-25264739:-"; transcript_id "SE:1:25257349-25258451:25258601-25264739:-:alternative2";
1	hq_isoforms.fasta.no5merge.collapsed.gff	exon	25257249	25257349	.	-	.	gene_id "SE:1:25257349-25258451:25258601-25264739:-"; transcript_id "SE:1:25257349-25258451:25258601-25264739:-:alternative1";
1	hq_isoforms.fasta.no5merge.collapsed.gff	exon	25258451	25258601	.	-	.	gene_id "SE:1:25257349-25258451:25258601-25264739:-"; transcript_id "SE:1:25257349-25258451:25258601-25264739:-:alternative1";
1	hq_isoforms.fasta.no5merge.collapsed.gff	exon	25264739	25264839	.	-	.	gene_id "SE:1:25257349-25258451:25258601-25264739:-"; transcript_id "SE:1:25257349-25258451:25258601-25264739:-:alternative1";
1	hq_isoforms.fasta.no5merge.collapsed.gff	exon	25410288	25410388	.	-	.	gene_id "SE:1:25410388-25416475:25416625-25426677:-"; transcript_id "SE:1:25410388-25416475:25416625-25426677:-:alternative2";
1	hq_isoforms.fasta.no5merge.collapsed.gff	exon	25426677	25426777	.	-	.	gene_id "SE:1:25410388-25416475:25416625-25426677:-"; transcript_id "SE:1:25410388-25416475:25416625-25426677:-:alternative2";
1	hq_isoforms.fasta.no5merge.collapsed.gff	exon	25410288	25410388	.	-	.	gene_id "SE:1:25410388-25416475:25416625-25426677:-"; transcript_id "SE:1:25410388-25416475:25416625-25426677:-:alternative1";
1	hq_isoforms.fasta.no5merge.collapsed.gff	exon	25416475	25416625	.	-	.	gene_id "SE:1:25410388-25416475:25416625-25426677:-"; transcript_id "SE:1:25410388-25416475:25416625-25426677:-:alternative1";
1	hq_isoforms.fasta.no5merge.collapsed.gff	exon	25426677	25426777	.	-	.	gene_id "SE:1:25410388-25416475:25416625-25426677:-"; transcript_id "SE:1:25410388-25416475:25416625-25426677:-:alternative1";
1	hq_isoforms.fasta.no5merge.collapsed.gff	exon	25426679	25426779	.	-	.	gene_id "SE:1:25426779-25427338:25427474-25428388:-"; transcript_id "SE:1:25426779-25427338:25427474-25428388:-:alternative2";
1	hq_isoforms.fasta.no5merge.collapsed.gff	exon	25428388	25428488	.	-	.	gene_id "SE:1:25426779-25427338:25427474-25428388:-"; transcript_id "SE:1:25426779-25427338:25427474-25428388:-:alternative2";
1	hq_isoforms.fasta.no5merge.collapsed.gff	exon	25426679	25426779	.	-	.	gene_id "SE:1:25426779-25427338:25427474-25428388:-"; transcript_id "SE:1:25426779-25427338:25427474-25428388:-:alternative1";
1	hq_isoforms.fasta.no5merge.collapsed.gff	exon	25427338	25427474	.	-	.	gene_id "SE:1:25426779-25427338:25427474-25428388:-"; transcript_id "SE:1:25426779-25427338:25427474-25428388:-:alternative1";
1	hq_isoforms.fasta.no5merge.collapsed.gff	exon	25428388	25428488	.	-	.	gene_id "SE:1:25426779-25427338:25427474-25428388:-"; transcript_id "SE:1:25426779-25427338:25427474-25428388:-:alternative1";
1	hq_isoforms.fasta.no5merge.collapsed.gff	exon	25772629	25772729	.	-	.	gene_id "SE:1:25772729-25780277:25780464-25780565:-"; transcript_id "SE:1:25772729-25780277:25780464-25780565:-:alternative2";
1	hq_isoforms.fasta.no5merge.collapsed.gff	exon	25780565	25780665	.	-	.	gene_id "SE:1:25772729-25780277:25780464-25780565:-"; transcript_id "SE:1:25772729-25780277:25780464-25780565:-:alternative2";
1	hq_isoforms.fasta.no5merge.collapsed.gff	exon	25772629	25772729	.	-	.	gene_id "SE:1:25772729-25780277:25780464-25780565:-"; transcript_id "SE:1:25772729-25780277:25780464-25780565:-:alternative1";
1	hq_isoforms.fasta.no5merge.collapsed.gff	exon	25780277	25780464	.	-	.	gene_id "SE:1:25772729-25780277:25780464-25780565:-"; transcript_id "SE:1:25772729-25780277:25780464-25780565:-:alternative1";
1	hq_isoforms.fasta.no5merge.collapsed.gff	exon	25780565	25780665	.	-	.	gene_id "SE:1:25772729-25780277:25780464-25780565:-"; transcript_id "SE:1:25772729-25780277:25780464-25780565:-:alternative1";
1	hq_isoforms.fasta.no5merge.collapsed.gff	exon	26674627	26674727	.	-	.	gene_id "SE:1:26674727-26675564:26675633-26676940:-"; transcript_id "SE:1:26674727-26675564:26675633-26676940:-:alternative2";
1	hq_isoforms.fasta.no5merge.collapsed.gff	exon	26676940	26677040	.	-	.	gene_id "SE:1:26674727-26675564:26675633-26676940:-"; transcript_id "SE:1:26674727-26675564:26675633-26676940:-:alternative2";
1	hq_isoforms.fasta.no5merge.collapsed.gff	exon	26674627	26674727	.	-	.	gene_id "SE:1:26674727-26675564:26675633-26676940:-"; transcript_id "SE:1:26674727-26675564:26675633-26676940:-:alternative1";
1	hq_isoforms.fasta.no5merge.collapsed.gff	exon	26675564	26675633	.	-	.	gene_id "SE:1:26674727-26675564:26675633-26676940:-"; transcript_id "SE:1:26674727-26675564:26675633-26676940:-:alternative1";
1	hq_isoforms.fasta.no5merge.collapsed.gff	exon	26676940	26677040	.	-	.	gene_id "SE:1:26674727-26675564:26675633-26676940:-"; transcript_id "SE:1:26674727-26675564:26675633-26676940:-:alternative1";
1	hq_isoforms.fasta.no5merge.collapsed.gff	exon	26698370	26698470	.	-	.	gene_id "SE:1:26698470-26700090:26700303-26706657:-"; transcript_id "SE:1:26698470-26700090:26700303-26706657:-:alternative2";
1	hq_isoforms.fasta.no5merge.collapsed.gff	exon	26706657	26706757	.	-	.	gene_id "SE:1:26698470-26700090:26700303-26706657:-"; transcript_id "SE:1:26698470-26700090:26700303-26706657:-:alternative2";
1	hq_isoforms.fasta.no5merge.collapsed.gff	exon	26698370	26698470	.	-	.	gene_id "SE:1:26698470-26700090:26700303-26706657:-"; transcript_id "SE:1:26698470-26700090:26700303-26706657:-:alternative1";
1	hq_isoforms.fasta.no5merge.collapsed.gff	exon	26700090	26700303	.	-	.	gene_id "SE:1:26698470-26700090:26700303-26706657:-"; transcript_id "SE:1:26698470-26700090:26700303-26706657:-:alternative1";
1	hq_isoforms.fasta.no5merge.collapsed.gff	exon	26706657	26706757	.	-	.	gene_id "SE:1:26698470-26700090:26700303-26706657:-"; transcript_id "SE:1:26698470-26700090:26700303-26706657:-:alternative1";
1	hq_isoforms.fasta.no5merge.collapsed.gff	exon	27697757	27697857	.	-	.	gene_id "SE:1:27697857-27698726:27698845-27699641:-"; transcript_id "SE:1:27697857-27698726:27698845-27699641:-:alternative2";
1	hq_isoforms.fasta.no5merge.collapsed.gff	exon	27699641	27699741	.	-	.	gene_id "SE:1:27697857-27698726:27698845-27699641:-"; transcript_id "SE:1:27697857-27698726:27698845-27699641:-:alternative2";
1	hq_isoforms.fasta.no5merge.collapsed.gff	exon	27697757	27697857	.	-	.	gene_id "SE:1:27697857-27698726:27698845-27699641:-"; transcript_id "SE:1:27697857-27698726:27698845-27699641:-:alternative1";
1	hq_isoforms.fasta.no5merge.collapsed.gff	exon	27698726	27698845	.	-	.	gene_id "SE:1:27697857-27698726:27698845-27699641:-"; transcript_id "SE:1:27697857-27698726:27698845-27699641:-:alternative1";
1	hq_isoforms.fasta.no5merge.collapsed.gff	exon	27699641	27699741	.	-	.	gene_id "SE:1:27697857-27698726:27698845-27699641:-"; transcript_id "SE:1:27697857-27698726:27698845-27699641:-:alternative1";
1	hq_isoforms.fasta.no5merge.collapsed.gff	exon	27702937	27703037	.	-	.	gene_id "SE:1:27703037-27704180:27704346-27705477:-"; transcript_id "SE:1:27703037-27704180:27704346-27705477:-:alternative2";
1	hq_isoforms.fasta.no5merge.collapsed.gff	exon	27705477	27705577	.	-	.	gene_id "SE:1:27703037-27704180:27704346-27705477:-"; transcript_id "SE:1:27703037-27704180:27704346-27705477:-:alternative2";
1	hq_isoforms.fasta.no5merge.collapsed.gff	exon	27702937	27703037	.	-	.	gene_id "SE:1:27703037-27704180:27704346-27705477:-"; transcript_id "SE:1:27703037-27704180:27704346-27705477:-:alternative1";
1	hq_isoforms.fasta.no5merge.collapsed.gff	exon	27704180	27704346	.	-	.	gene_id "SE:1:27703037-27704180:27704346-27705477:-"; transcript_id "SE:1:27703037-27704180:27704346-27705477:-:alternative1";
1	hq_isoforms.fasta.no5merge.collapsed.gff	exon	27705477	27705577	.	-	.	gene_id "SE:1:27703037-27704180:27704346-27705477:-"; transcript_id "SE:1:27703037-27704180:27704346-27705477:-:alternative1";
1	hq_isoforms.fasta.no5merge.collapsed.gff	exon	27797309	27797409	.	-	.	gene_id "SE:1:27797409-27816503:27816613-27818667:-"; transcript_id "SE:1:27797409-27816503:27816613-27818667:-:alternative2";
1	hq_isoforms.fasta.no5merge.collapsed.gff	exon	27818667	27818767	.	-	.	gene_id "SE:1:27797409-27816503:27816613-27818667:-"; transcript_id "SE:1:27797409-27816503:27816613-27818667:-:alternative2";
1	hq_isoforms.fasta.no5merge.collapsed.gff	exon	27797309	27797409	.	-	.	gene_id "SE:1:27797409-27816503:27816613-27818667:-"; transcript_id "SE:1:27797409-27816503:27816613-27818667:-:alternative1";
1	hq_isoforms.fasta.no5merge.collapsed.gff	exon	27816503	27816613	.	-	.	gene_id "SE:1:27797409-27816503:27816613-27818667:-"; transcript_id "SE:1:27797409-27816503:27816613-27818667:-:alternative1";
1	hq_isoforms.fasta.no5merge.collapsed.gff	exon	27818667	27818767	.	-	.	gene_id "SE:1:27797409-27816503:27816613-27818667:-"; transcript_id "SE:1:27797409-27816503:27816613-27818667:-:alternative1";
1	hq_isoforms.fasta.no5merge.collapsed.gff	exon	27767910	27768010	.	-	.	gene_id "SE:1:27768010-27774733:27774865-27778082:-"; transcript_id "SE:1:27768010-27774733:27774865-27778082:-:alternative2";
1	hq_isoforms.fasta.no5merge.collapsed.gff	exon	27778082	27778182	.	-	.	gene_id "SE:1:27768010-27774733:27774865-27778082:-"; transcript_id "SE:1:27768010-27774733:27774865-27778082:-:alternative2";
1	hq_isoforms.fasta.no5merge.collapsed.gff	exon	27767910	27768010	.	-	.	gene_id "SE:1:27768010-27774733:27774865-27778082:-"; transcript_id "SE:1:27768010-27774733:27774865-27778082:-:alternative1";
1	hq_isoforms.fasta.no5merge.collapsed.gff	exon	27774733	27774865	.	-	.	gene_id "SE:1:27768010-27774733:27774865-27778082:-"; transcript_id "SE:1:27768010-27774733:27774865-27778082:-:alternative1";
1	hq_isoforms.fasta.no5merge.collapsed.gff	exon	27778082	27778182	.	-	.	gene_id "SE:1:27768010-27774733:27774865-27778082:-"; transcript_id "SE:1:27768010-27774733:27774865-27778082:-:alternative1";
1	hq_isoforms.fasta.no5merge.collapsed.gff	exon	27797309	27797409	.	-	.	gene_id "SE:1:27797409-27809919:27809953-27818667:-"; transcript_id "SE:1:27797409-27809919:27809953-27818667:-:alternative2";
1	hq_isoforms.fasta.no5merge.collapsed.gff	exon	27818667	27818767	.	-	.	gene_id "SE:1:27797409-27809919:27809953-27818667:-"; transcript_id "SE:1:27797409-27809919:27809953-27818667:-:alternative2";
1	hq_isoforms.fasta.no5merge.collapsed.gff	exon	27797309	27797409	.	-	.	gene_id "SE:1:27797409-27809919:27809953-27818667:-"; transcript_id "SE:1:27797409-27809919:27809953-27818667:-:alternative1";
1	hq_isoforms.fasta.no5merge.collapsed.gff	exon	27809919	27809953	.	-	.	gene_id "SE:1:27797409-27809919:27809953-27818667:-"; transcript_id "SE:1:27797409-27809919:27809953-27818667:-:alternative1";
1	hq_isoforms.fasta.no5merge.collapsed.gff	exon	27818667	27818767	.	-	.	gene_id "SE:1:27797409-27809919:27809953-27818667:-"; transcript_id "SE:1:27797409-27809919:27809953-27818667:-:alternative1";
1	hq_isoforms.fasta.no5merge.collapsed.gff	exon	27779551	27779651	.	-	.	gene_id "SE:1:27779651-27788657:27788759-27792057:-"; transcript_id "SE:1:27779651-27788657:27788759-27792057:-:alternative2";
1	hq_isoforms.fasta.no5merge.collapsed.gff	exon	27792057	27792157	.	-	.	gene_id "SE:1:27779651-27788657:27788759-27792057:-"; transcript_id "SE:1:27779651-27788657:27788759-27792057:-:alternative2";
1	hq_isoforms.fasta.no5merge.collapsed.gff	exon	27779551	27779651	.	-	.	gene_id "SE:1:27779651-27788657:27788759-27792057:-"; transcript_id "SE:1:27779651-27788657:27788759-27792057:-:alternative1";
1	hq_isoforms.fasta.no5merge.collapsed.gff	exon	27788657	27788759	.	-	.	gene_id "SE:1:27779651-27788657:27788759-27792057:-"; transcript_id "SE:1:27779651-27788657:27788759-27792057:-:alternative1";
1	hq_isoforms.fasta.no5merge.collapsed.gff	exon	27792057	27792157	.	-	.	gene_id "SE:1:27779651-27788657:27788759-27792057:-"; transcript_id "SE:1:27779651-27788657:27788759-27792057:-:alternative1";
1	hq_isoforms.fasta.no5merge.collapsed.gff	exon	29511811	29511911	.	-	.	gene_id "SE:1:29511911-29512785:29512814-29514175:-"; transcript_id "SE:1:29511911-29512785:29512814-29514175:-:alternative2";
1	hq_isoforms.fasta.no5merge.collapsed.gff	exon	29514175	29514275	.	-	.	gene_id "SE:1:29511911-29512785:29512814-29514175:-"; transcript_id "SE:1:29511911-29512785:29512814-29514175:-:alternative2";
1	hq_isoforms.fasta.no5merge.collapsed.gff	exon	29511811	29511911	.	-	.	gene_id "SE:1:29511911-29512785:29512814-29514175:-"; transcript_id "SE:1:29511911-29512785:29512814-29514175:-:alternative1";
1	hq_isoforms.fasta.no5merge.collapsed.gff	exon	29512785	29512814	.	-	.	gene_id "SE:1:29511911-29512785:29512814-29514175:-"; transcript_id "SE:1:29511911-29512785:29512814-29514175:-:alternative1";
1	hq_isoforms.fasta.no5merge.collapsed.gff	exon	29514175	29514275	.	-	.	gene_id "SE:1:29511911-29512785:29512814-29514175:-"; transcript_id "SE:1:29511911-29512785:29512814-29514175:-:alternative1";
1	hq_isoforms.fasta.no5merge.collapsed.gff	exon	32387796	32387896	.	-	.	gene_id "SE:1:32387896-32388572:32388767-32389580:-"; transcript_id "SE:1:32387896-32388572:32388767-32389580:-:alternative2";
1	hq_isoforms.fasta.no5merge.collapsed.gff	exon	32389580	32389680	.	-	.	gene_id "SE:1:32387896-32388572:32388767-32389580:-"; transcript_id "SE:1:32387896-32388572:32388767-32389580:-:alternative2";
1	hq_isoforms.fasta.no5merge.collapsed.gff	exon	32387796	32387896	.	-	.	gene_id "SE:1:32387896-32388572:32388767-32389580:-"; transcript_id "SE:1:32387896-32388572:32388767-32389580:-:alternative1";
1	hq_isoforms.fasta.no5merge.collapsed.gff	exon	32388572	32388767	.	-	.	gene_id "SE:1:32387896-32388572:32388767-32389580:-"; transcript_id "SE:1:32387896-32388572:32388767-32389580:-:alternative1";
1	hq_isoforms.fasta.no5merge.collapsed.gff	exon	32389580	32389680	.	-	.	gene_id "SE:1:32387896-32388572:32388767-32389580:-"; transcript_id "SE:1:32387896-32388572:32388767-32389580:-:alternative1";
1	hq_isoforms.fasta.no5merge.collapsed.gff	exon	32400395	32400495	.	-	.	gene_id "SE:1:32400495-32401508:32401666-32403637:-"; transcript_id "SE:1:32400495-32401508:32401666-32403637:-:alternative2";
1	hq_isoforms.fasta.no5merge.collapsed.gff	exon	32403637	32403737	.	-	.	gene_id "SE:1:32400495-32401508:32401666-32403637:-"; transcript_id "SE:1:32400495-32401508:32401666-32403637:-:alternative2";
1	hq_isoforms.fasta.no5merge.collapsed.gff	exon	32400395	32400495	.	-	.	gene_id "SE:1:32400495-32401508:32401666-32403637:-"; transcript_id "SE:1:32400495-32401508:32401666-32403637:-:alternative1";
1	hq_isoforms.fasta.no5merge.collapsed.gff	exon	32401508	32401666	.	-	.	gene_id "SE:1:32400495-32401508:32401666-32403637:-"; transcript_id "SE:1:32400495-32401508:32401666-32403637:-:alternative1";
1	hq_isoforms.fasta.no5merge.collapsed.gff	exon	32403637	32403737	.	-	.	gene_id "SE:1:32400495-32401508:32401666-32403637:-"; transcript_id "SE:1:32400495-32401508:32401666-32403637:-:alternative1";
1	hq_isoforms.fasta.no5merge.collapsed.gff	exon	30853988	30854088	.	-	.	gene_id "SE:1:30854088-30859352:30859514-30873240:-"; transcript_id "SE:1:30854088-30859352:30859514-30873240:-:alternative2";
1	hq_isoforms.fasta.no5merge.collapsed.gff	exon	30873240	30873340	.	-	.	gene_id "SE:1:30854088-30859352:30859514-30873240:-"; transcript_id "SE:1:30854088-30859352:30859514-30873240:-:alternative2";
1	hq_isoforms.fasta.no5merge.collapsed.gff	exon	30853988	30854088	.	-	.	gene_id "SE:1:30854088-30859352:30859514-30873240:-"; transcript_id "SE:1:30854088-30859352:30859514-30873240:-:alternative1";
1	hq_isoforms.fasta.no5merge.collapsed.gff	exon	30859352	30859514	.	-	.	gene_id "SE:1:30854088-30859352:30859514-30873240:-"; transcript_id "SE:1:30854088-30859352:30859514-30873240:-:alternative1";
1	hq_isoforms.fasta.no5merge.collapsed.gff	exon	30873240	30873340	.	-	.	gene_id "SE:1:30854088-30859352:30859514-30873240:-"; transcript_id "SE:1:30854088-30859352:30859514-30873240:-:alternative1";
1	hq_isoforms.fasta.no5merge.collapsed.gff	exon	30966017	30966117	.	-	.	gene_id "SE:1:30966117-30967440:30967618-30970008:-"; transcript_id "SE:1:30966117-30967440:30967618-30970008:-:alternative2";
1	hq_isoforms.fasta.no5merge.collapsed.gff	exon	30970008	30970108	.	-	.	gene_id "SE:1:30966117-30967440:30967618-30970008:-"; transcript_id "SE:1:30966117-30967440:30967618-30970008:-:alternative2";
1	hq_isoforms.fasta.no5merge.collapsed.gff	exon	30966017	30966117	.	-	.	gene_id "SE:1:30966117-30967440:30967618-30970008:-"; transcript_id "SE:1:30966117-30967440:30967618-30970008:-:alternative1";
1	hq_isoforms.fasta.no5merge.collapsed.gff	exon	30967440	30967618	.	-	.	gene_id "SE:1:30966117-30967440:30967618-30970008:-"; transcript_id "SE:1:30966117-30967440:30967618-30970008:-:alternative1";
1	hq_isoforms.fasta.no5merge.collapsed.gff	exon	30970008	30970108	.	-	.	gene_id "SE:1:30966117-30967440:30967618-30970008:-"; transcript_id "SE:1:30966117-30967440:30967618-30970008:-:alternative1";
1	hq_isoforms.fasta.no5merge.collapsed.gff	exon	30967518	30967618	.	-	.	gene_id "SE:1:30967618-30969066:30969156-30970008:-"; transcript_id "SE:1:30967618-30969066:30969156-30970008:-:alternative2";
1	hq_isoforms.fasta.no5merge.collapsed.gff	exon	30970008	30970108	.	-	.	gene_id "SE:1:30967618-30969066:30969156-30970008:-"; transcript_id "SE:1:30967618-30969066:30969156-30970008:-:alternative2";
1	hq_isoforms.fasta.no5merge.collapsed.gff	exon	30967518	30967618	.	-	.	gene_id "SE:1:30967618-30969066:30969156-30970008:-"; transcript_id "SE:1:30967618-30969066:30969156-30970008:-:alternative1";
1	hq_isoforms.fasta.no5merge.collapsed.gff	exon	30969066	30969156	.	-	.	gene_id "SE:1:30967618-30969066:30969156-30970008:-"; transcript_id "SE:1:30967618-30969066:30969156-30970008:-:alternative1";
1	hq_isoforms.fasta.no5merge.collapsed.gff	exon	30970008	30970108	.	-	.	gene_id "SE:1:30967618-30969066:30969156-30970008:-"; transcript_id "SE:1:30967618-30969066:30969156-30970008:-:alternative1";
1	hq_isoforms.fasta.no5merge.collapsed.gff	exon	31899857	31899957	.	-	.	gene_id "SE:1:31899957-31900051:31900124-31902911:-"; transcript_id "SE:1:31899957-31900051:31900124-31902911:-:alternative2";
1	hq_isoforms.fasta.no5merge.collapsed.gff	exon	31902911	31903011	.	-	.	gene_id "SE:1:31899957-31900051:31900124-31902911:-"; transcript_id "SE:1:31899957-31900051:31900124-31902911:-:alternative2";
1	hq_isoforms.fasta.no5merge.collapsed.gff	exon	31899857	31899957	.	-	.	gene_id "SE:1:31899957-31900051:31900124-31902911:-"; transcript_id "SE:1:31899957-31900051:31900124-31902911:-:alternative1";
1	hq_isoforms.fasta.no5merge.collapsed.gff	exon	31900051	31900124	.	-	.	gene_id "SE:1:31899957-31900051:31900124-31902911:-"; transcript_id "SE:1:31899957-31900051:31900124-31902911:-:alternative1";
1	hq_isoforms.fasta.no5merge.collapsed.gff	exon	31902911	31903011	.	-	.	gene_id "SE:1:31899957-31900051:31900124-31902911:-"; transcript_id "SE:1:31899957-31900051:31900124-31902911:-:alternative1";
1	hq_isoforms.fasta.no5merge.collapsed.gff	exon	31900024	31900124	.	-	.	gene_id "SE:1:31900124-31902911:31903026-31903150:-"; transcript_id "SE:1:31900124-31902911:31903026-31903150:-:alternative2";
1	hq_isoforms.fasta.no5merge.collapsed.gff	exon	31903150	31903250	.	-	.	gene_id "SE:1:31900124-31902911:31903026-31903150:-"; transcript_id "SE:1:31900124-31902911:31903026-31903150:-:alternative2";
1	hq_isoforms.fasta.no5merge.collapsed.gff	exon	31900024	31900124	.	-	.	gene_id "SE:1:31900124-31902911:31903026-31903150:-"; transcript_id "SE:1:31900124-31902911:31903026-31903150:-:alternative1";
1	hq_isoforms.fasta.no5merge.collapsed.gff	exon	31902911	31903026	.	-	.	gene_id "SE:1:31900124-31902911:31903026-31903150:-"; transcript_id "SE:1:31900124-31902911:31903026-31903150:-:alternative1";
1	hq_isoforms.fasta.no5merge.collapsed.gff	exon	31903150	31903250	.	-	.	gene_id "SE:1:31900124-31902911:31903026-31903150:-"; transcript_id "SE:1:31900124-31902911:31903026-31903150:-:alternative1";
1	hq_isoforms.fasta.no5merge.collapsed.gff	exon	31896440	31896540	.	-	.	gene_id "SE:1:31896540-31898018:31898076-31899590:-"; transcript_id "SE:1:31896540-31898018:31898076-31899590:-:alternative2";
1	hq_isoforms.fasta.no5merge.collapsed.gff	exon	31899590	31899690	.	-	.	gene_id "SE:1:31896540-31898018:31898076-31899590:-"; transcript_id "SE:1:31896540-31898018:31898076-31899590:-:alternative2";
1	hq_isoforms.fasta.no5merge.collapsed.gff	exon	31896440	31896540	.	-	.	gene_id "SE:1:31896540-31898018:31898076-31899590:-"; transcript_id "SE:1:31896540-31898018:31898076-31899590:-:alternative1";
1	hq_isoforms.fasta.no5merge.collapsed.gff	exon	31898018	31898076	.	-	.	gene_id "SE:1:31896540-31898018:31898076-31899590:-"; transcript_id "SE:1:31896540-31898018:31898076-31899590:-:alternative1";
1	hq_isoforms.fasta.no5merge.collapsed.gff	exon	31899590	31899690	.	-	.	gene_id "SE:1:31896540-31898018:31898076-31899590:-"; transcript_id "SE:1:31896540-31898018:31898076-31899590:-:alternative1";
1	hq_isoforms.fasta.no5merge.collapsed.gff	exon	31896440	31896540	.	-	.	gene_id "SE:1:31896540-31898620:31898713-31899590:-"; transcript_id "SE:1:31896540-31898620:31898713-31899590:-:alternative2";
1	hq_isoforms.fasta.no5merge.collapsed.gff	exon	31899590	31899690	.	-	.	gene_id "SE:1:31896540-31898620:31898713-31899590:-"; transcript_id "SE:1:31896540-31898620:31898713-31899590:-:alternative2";
1	hq_isoforms.fasta.no5merge.collapsed.gff	exon	31896440	31896540	.	-	.	gene_id "SE:1:31896540-31898620:31898713-31899590:-"; transcript_id "SE:1:31896540-31898620:31898713-31899590:-:alternative1";
1	hq_isoforms.fasta.no5merge.collapsed.gff	exon	31898620	31898713	.	-	.	gene_id "SE:1:31896540-31898620:31898713-31899590:-"; transcript_id "SE:1:31896540-31898620:31898713-31899590:-:alternative1";
1	hq_isoforms.fasta.no5merge.collapsed.gff	exon	31899590	31899690	.	-	.	gene_id "SE:1:31896540-31898620:31898713-31899590:-"; transcript_id "SE:1:31896540-31898620:31898713-31899590:-:alternative1";
1	hq_isoforms.fasta.no5merge.collapsed.gff	exon	31896440	31896540	.	-	.	gene_id "SE:1:31896540-31898018:31898129-31898620:-"; transcript_id "SE:1:31896540-31898018:31898129-31898620:-:alternative2";
1	hq_isoforms.fasta.no5merge.collapsed.gff	exon	31898620	31898720	.	-	.	gene_id "SE:1:31896540-31898018:31898129-31898620:-"; transcript_id "SE:1:31896540-31898018:31898129-31898620:-:alternative2";
1	hq_isoforms.fasta.no5merge.collapsed.gff	exon	31896440	31896540	.	-	.	gene_id "SE:1:31896540-31898018:31898129-31898620:-"; transcript_id "SE:1:31896540-31898018:31898129-31898620:-:alternative1";
1	hq_isoforms.fasta.no5merge.collapsed.gff	exon	31898018	31898129	.	-	.	gene_id "SE:1:31896540-31898018:31898129-31898620:-"; transcript_id "SE:1:31896540-31898018:31898129-31898620:-:alternative1";
1	hq_isoforms.fasta.no5merge.collapsed.gff	exon	31898620	31898720	.	-	.	gene_id "SE:1:31896540-31898018:31898129-31898620:-"; transcript_id "SE:1:31896540-31898018:31898129-31898620:-:alternative1";
1	hq_isoforms.fasta.no5merge.collapsed.gff	exon	31898029	31898129	.	-	.	gene_id "SE:1:31898129-31898620:31898713-31899590:-"; transcript_id "SE:1:31898129-31898620:31898713-31899590:-:alternative2";
1	hq_isoforms.fasta.no5merge.collapsed.gff	exon	31899590	31899690	.	-	.	gene_id "SE:1:31898129-31898620:31898713-31899590:-"; transcript_id "SE:1:31898129-31898620:31898713-31899590:-:alternative2";
1	hq_isoforms.fasta.no5merge.collapsed.gff	exon	31898029	31898129	.	-	.	gene_id "SE:1:31898129-31898620:31898713-31899590:-"; transcript_id "SE:1:31898129-31898620:31898713-31899590:-:alternative1";
1	hq_isoforms.fasta.no5merge.collapsed.gff	exon	31898620	31898713	.	-	.	gene_id "SE:1:31898129-31898620:31898713-31899590:-"; transcript_id "SE:1:31898129-31898620:31898713-31899590:-:alternative1";
1	hq_isoforms.fasta.no5merge.collapsed.gff	exon	31899590	31899690	.	-	.	gene_id "SE:1:31898129-31898620:31898713-31899590:-"; transcript_id "SE:1:31898129-31898620:31898713-31899590:-:alternative1";
1	hq_isoforms.fasta.no5merge.collapsed.gff	exon	31896440	31896540	.	-	.	gene_id "SE:1:31896540-31898018:31898076-31898620:-"; transcript_id "SE:1:31896540-31898018:31898076-31898620:-:alternative2";
1	hq_isoforms.fasta.no5merge.collapsed.gff	exon	31898620	31898720	.	-	.	gene_id "SE:1:31896540-31898018:31898076-31898620:-"; transcript_id "SE:1:31896540-31898018:31898076-31898620:-:alternative2";
1	hq_isoforms.fasta.no5merge.collapsed.gff	exon	31896440	31896540	.	-	.	gene_id "SE:1:31896540-31898018:31898076-31898620:-"; transcript_id "SE:1:31896540-31898018:31898076-31898620:-:alternative1";
1	hq_isoforms.fasta.no5merge.collapsed.gff	exon	31898018	31898076	.	-	.	gene_id "SE:1:31896540-31898018:31898076-31898620:-"; transcript_id "SE:1:31896540-31898018:31898076-31898620:-:alternative1";
1	hq_isoforms.fasta.no5merge.collapsed.gff	exon	31898620	31898720	.	-	.	gene_id "SE:1:31896540-31898018:31898076-31898620:-"; transcript_id "SE:1:31896540-31898018:31898076-31898620:-:alternative1";
1	hq_isoforms.fasta.no5merge.collapsed.gff	exon	31899857	31899957	.	-	.	gene_id "SE:1:31899957-31900051:31900083-31902911:-"; transcript_id "SE:1:31899957-31900051:31900083-31902911:-:alternative2";
1	hq_isoforms.fasta.no5merge.collapsed.gff	exon	31902911	31903011	.	-	.	gene_id "SE:1:31899957-31900051:31900083-31902911:-"; transcript_id "SE:1:31899957-31900051:31900083-31902911:-:alternative2";
1	hq_isoforms.fasta.no5merge.collapsed.gff	exon	31899857	31899957	.	-	.	gene_id "SE:1:31899957-31900051:31900083-31902911:-"; transcript_id "SE:1:31899957-31900051:31900083-31902911:-:alternative1";
1	hq_isoforms.fasta.no5merge.collapsed.gff	exon	31900051	31900083	.	-	.	gene_id "SE:1:31899957-31900051:31900083-31902911:-"; transcript_id "SE:1:31899957-31900051:31900083-31902911:-:alternative1";
1	hq_isoforms.fasta.no5merge.collapsed.gff	exon	31902911	31903011	.	-	.	gene_id "SE:1:31899957-31900051:31900083-31902911:-"; transcript_id "SE:1:31899957-31900051:31900083-31902911:-:alternative1";
1	hq_isoforms.fasta.no5merge.collapsed.gff	exon	31897976	31898076	.	-	.	gene_id "SE:1:31898076-31898620:31898713-31899590:-"; transcript_id "SE:1:31898076-31898620:31898713-31899590:-:alternative2";
1	hq_isoforms.fasta.no5merge.collapsed.gff	exon	31899590	31899690	.	-	.	gene_id "SE:1:31898076-31898620:31898713-31899590:-"; transcript_id "SE:1:31898076-31898620:31898713-31899590:-:alternative2";
1	hq_isoforms.fasta.no5merge.collapsed.gff	exon	31897976	31898076	.	-	.	gene_id "SE:1:31898076-31898620:31898713-31899590:-"; transcript_id "SE:1:31898076-31898620:31898713-31899590:-:alternative1";
1	hq_isoforms.fasta.no5merge.collapsed.gff	exon	31898620	31898713	.	-	.	gene_id "SE:1:31898076-31898620:31898713-31899590:-"; transcript_id "SE:1:31898076-31898620:31898713-31899590:-:alternative1";
1	hq_isoforms.fasta.no5merge.collapsed.gff	exon	31899590	31899690	.	-	.	gene_id "SE:1:31898076-31898620:31898713-31899590:-"; transcript_id "SE:1:31898076-31898620:31898713-31899590:-:alternative1";
1	hq_isoforms.fasta.no5merge.collapsed.gff	exon	31896440	31896540	.	-	.	gene_id "SE:1:31896540-31898018:31898129-31899590:-"; transcript_id "SE:1:31896540-31898018:31898129-31899590:-:alternative2";
1	hq_isoforms.fasta.no5merge.collapsed.gff	exon	31899590	31899690	.	-	.	gene_id "SE:1:31896540-31898018:31898129-31899590:-"; transcript_id "SE:1:31896540-31898018:31898129-31899590:-:alternative2";
1	hq_isoforms.fasta.no5merge.collapsed.gff	exon	31896440	31896540	.	-	.	gene_id "SE:1:31896540-31898018:31898129-31899590:-"; transcript_id "SE:1:31896540-31898018:31898129-31899590:-:alternative1";
1	hq_isoforms.fasta.no5merge.collapsed.gff	exon	31898018	31898129	.	-	.	gene_id "SE:1:31896540-31898018:31898129-31899590:-"; transcript_id "SE:1:31896540-31898018:31898129-31899590:-:alternative1";
1	hq_isoforms.fasta.no5merge.collapsed.gff	exon	31899590	31899690	.	-	.	gene_id "SE:1:31896540-31898018:31898129-31899590:-"; transcript_id "SE:1:31896540-31898018:31898129-31899590:-:alternative1";
1	hq_isoforms.fasta.no5merge.collapsed.gff	exon	32401566	32401666	.	-	.	gene_id "SE:1:32401666-32403138:32403239-32403637:-"; transcript_id "SE:1:32401666-32403138:32403239-32403637:-:alternative2";
1	hq_isoforms.fasta.no5merge.collapsed.gff	exon	32403637	32403737	.	-	.	gene_id "SE:1:32401666-32403138:32403239-32403637:-"; transcript_id "SE:1:32401666-32403138:32403239-32403637:-:alternative2";
1	hq_isoforms.fasta.no5merge.collapsed.gff	exon	32401566	32401666	.	-	.	gene_id "SE:1:32401666-32403138:32403239-32403637:-"; transcript_id "SE:1:32401666-32403138:32403239-32403637:-:alternative1";
1	hq_isoforms.fasta.no5merge.collapsed.gff	exon	32403138	32403239	.	-	.	gene_id "SE:1:32401666-32403138:32403239-32403637:-"; transcript_id "SE:1:32401666-32403138:32403239-32403637:-:alternative1";
1	hq_isoforms.fasta.no5merge.collapsed.gff	exon	32403637	32403737	.	-	.	gene_id "SE:1:32401666-32403138:32403239-32403637:-"; transcript_id "SE:1:32401666-32403138:32403239-32403637:-:alternative1";
1	hq_isoforms.fasta.no5merge.collapsed.gff	exon	32395344	32395444	.	-	.	gene_id "SE:1:32395444-32396092:32396186-32396338:-"; transcript_id "SE:1:32395444-32396092:32396186-32396338:-:alternative2";
1	hq_isoforms.fasta.no5merge.collapsed.gff	exon	32396338	32396438	.	-	.	gene_id "SE:1:32395444-32396092:32396186-32396338:-"; transcript_id "SE:1:32395444-32396092:32396186-32396338:-:alternative2";
1	hq_isoforms.fasta.no5merge.collapsed.gff	exon	32395344	32395444	.	-	.	gene_id "SE:1:32395444-32396092:32396186-32396338:-"; transcript_id "SE:1:32395444-32396092:32396186-32396338:-:alternative1";
1	hq_isoforms.fasta.no5merge.collapsed.gff	exon	32396092	32396186	.	-	.	gene_id "SE:1:32395444-32396092:32396186-32396338:-"; transcript_id "SE:1:32395444-32396092:32396186-32396338:-:alternative1";
1	hq_isoforms.fasta.no5merge.collapsed.gff	exon	32396338	32396438	.	-	.	gene_id "SE:1:32395444-32396092:32396186-32396338:-"; transcript_id "SE:1:32395444-32396092:32396186-32396338:-:alternative1";
1	hq_isoforms.fasta.no5merge.collapsed.gff	exon	32700781	32700881	.	-	.	gene_id "SE:1:32700881-32701144:32701296-32703797:-"; transcript_id "SE:1:32700881-32701144:32701296-32703797:-:alternative2";
1	hq_isoforms.fasta.no5merge.collapsed.gff	exon	32703797	32703897	.	-	.	gene_id "SE:1:32700881-32701144:32701296-32703797:-"; transcript_id "SE:1:32700881-32701144:32701296-32703797:-:alternative2";
1	hq_isoforms.fasta.no5merge.collapsed.gff	exon	32700781	32700881	.	-	.	gene_id "SE:1:32700881-32701144:32701296-32703797:-"; transcript_id "SE:1:32700881-32701144:32701296-32703797:-:alternative1";
1	hq_isoforms.fasta.no5merge.collapsed.gff	exon	32701144	32701296	.	-	.	gene_id "SE:1:32700881-32701144:32701296-32703797:-"; transcript_id "SE:1:32700881-32701144:32701296-32703797:-:alternative1";
1	hq_isoforms.fasta.no5merge.collapsed.gff	exon	32703797	32703897	.	-	.	gene_id "SE:1:32700881-32701144:32701296-32703797:-"; transcript_id "SE:1:32700881-32701144:32701296-32703797:-:alternative1";
1	hq_isoforms.fasta.no5merge.collapsed.gff	exon	33828721	33828821	.	-	.	gene_id "SE:1:33828821-33840825:33841065-33854790:-"; transcript_id "SE:1:33828821-33840825:33841065-33854790:-:alternative2";
1	hq_isoforms.fasta.no5merge.collapsed.gff	exon	33854790	33854890	.	-	.	gene_id "SE:1:33828821-33840825:33841065-33854790:-"; transcript_id "SE:1:33828821-33840825:33841065-33854790:-:alternative2";
1	hq_isoforms.fasta.no5merge.collapsed.gff	exon	33828721	33828821	.	-	.	gene_id "SE:1:33828821-33840825:33841065-33854790:-"; transcript_id "SE:1:33828821-33840825:33841065-33854790:-:alternative1";
1	hq_isoforms.fasta.no5merge.collapsed.gff	exon	33840825	33841065	.	-	.	gene_id "SE:1:33828821-33840825:33841065-33854790:-"; transcript_id "SE:1:33828821-33840825:33841065-33854790:-:alternative1";
1	hq_isoforms.fasta.no5merge.collapsed.gff	exon	33854790	33854890	.	-	.	gene_id "SE:1:33828821-33840825:33841065-33854790:-"; transcript_id "SE:1:33828821-33840825:33841065-33854790:-:alternative1";
1	hq_isoforms.fasta.no5merge.collapsed.gff	exon	34832662	34832762	.	-	.	gene_id "SE:1:34832762-34833353:34833532-34833808:-"; transcript_id "SE:1:34832762-34833353:34833532-34833808:-:alternative2";
1	hq_isoforms.fasta.no5merge.collapsed.gff	exon	34833808	34833908	.	-	.	gene_id "SE:1:34832762-34833353:34833532-34833808:-"; transcript_id "SE:1:34832762-34833353:34833532-34833808:-:alternative2";
1	hq_isoforms.fasta.no5merge.collapsed.gff	exon	34832662	34832762	.	-	.	gene_id "SE:1:34832762-34833353:34833532-34833808:-"; transcript_id "SE:1:34832762-34833353:34833532-34833808:-:alternative1";
1	hq_isoforms.fasta.no5merge.collapsed.gff	exon	34833353	34833532	.	-	.	gene_id "SE:1:34832762-34833353:34833532-34833808:-"; transcript_id "SE:1:34832762-34833353:34833532-34833808:-:alternative1";
1	hq_isoforms.fasta.no5merge.collapsed.gff	exon	34833808	34833908	.	-	.	gene_id "SE:1:34832762-34833353:34833532-34833808:-"; transcript_id "SE:1:34832762-34833353:34833532-34833808:-:alternative1";
1	hq_isoforms.fasta.no5merge.collapsed.gff	exon	35115635	35115735	.	-	.	gene_id "SE:1:35115735-35117999:35118094-35118654:-"; transcript_id "SE:1:35115735-35117999:35118094-35118654:-:alternative2";
1	hq_isoforms.fasta.no5merge.collapsed.gff	exon	35118654	35118754	.	-	.	gene_id "SE:1:35115735-35117999:35118094-35118654:-"; transcript_id "SE:1:35115735-35117999:35118094-35118654:-:alternative2";
1	hq_isoforms.fasta.no5merge.collapsed.gff	exon	35115635	35115735	.	-	.	gene_id "SE:1:35115735-35117999:35118094-35118654:-"; transcript_id "SE:1:35115735-35117999:35118094-35118654:-:alternative1";
1	hq_isoforms.fasta.no5merge.collapsed.gff	exon	35117999	35118094	.	-	.	gene_id "SE:1:35115735-35117999:35118094-35118654:-"; transcript_id "SE:1:35115735-35117999:35118094-35118654:-:alternative1";
1	hq_isoforms.fasta.no5merge.collapsed.gff	exon	35118654	35118754	.	-	.	gene_id "SE:1:35115735-35117999:35118094-35118654:-"; transcript_id "SE:1:35115735-35117999:35118094-35118654:-:alternative1";
1	hq_isoforms.fasta.no5merge.collapsed.gff	exon	35703512	35703612	.	-	.	gene_id "SE:1:35703612-35706059:35706103-35706249:-"; transcript_id "SE:1:35703612-35706059:35706103-35706249:-:alternative2";
1	hq_isoforms.fasta.no5merge.collapsed.gff	exon	35706249	35706349	.	-	.	gene_id "SE:1:35703612-35706059:35706103-35706249:-"; transcript_id "SE:1:35703612-35706059:35706103-35706249:-:alternative2";
1	hq_isoforms.fasta.no5merge.collapsed.gff	exon	35703512	35703612	.	-	.	gene_id "SE:1:35703612-35706059:35706103-35706249:-"; transcript_id "SE:1:35703612-35706059:35706103-35706249:-:alternative1";
1	hq_isoforms.fasta.no5merge.collapsed.gff	exon	35706059	35706103	.	-	.	gene_id "SE:1:35703612-35706059:35706103-35706249:-"; transcript_id "SE:1:35703612-35706059:35706103-35706249:-:alternative1";
1	hq_isoforms.fasta.no5merge.collapsed.gff	exon	35706249	35706349	.	-	.	gene_id "SE:1:35703612-35706059:35706103-35706249:-"; transcript_id "SE:1:35703612-35706059:35706103-35706249:-:alternative1";
1	hq_isoforms.fasta.no5merge.collapsed.gff	exon	35696890	35696990	.	-	.	gene_id "SE:1:35696990-35703379:35703612-35706249:-"; transcript_id "SE:1:35696990-35703379:35703612-35706249:-:alternative2";
1	hq_isoforms.fasta.no5merge.collapsed.gff	exon	35706249	35706349	.	-	.	gene_id "SE:1:35696990-35703379:35703612-35706249:-"; transcript_id "SE:1:35696990-35703379:35703612-35706249:-:alternative2";
1	hq_isoforms.fasta.no5merge.collapsed.gff	exon	35696890	35696990	.	-	.	gene_id "SE:1:35696990-35703379:35703612-35706249:-"; transcript_id "SE:1:35696990-35703379:35703612-35706249:-:alternative1";
1	hq_isoforms.fasta.no5merge.collapsed.gff	exon	35703379	35703612	.	-	.	gene_id "SE:1:35696990-35703379:35703612-35706249:-"; transcript_id "SE:1:35696990-35703379:35703612-35706249:-:alternative1";
1	hq_isoforms.fasta.no5merge.collapsed.gff	exon	35706249	35706349	.	-	.	gene_id "SE:1:35696990-35703379:35703612-35706249:-"; transcript_id "SE:1:35696990-35703379:35703612-35706249:-:alternative1";
1	hq_isoforms.fasta.no5merge.collapsed.gff	exon	36413668	36413768	.	-	.	gene_id "SE:1:36413768-36414150:36414188-36418359:-"; transcript_id "SE:1:36413768-36414150:36414188-36418359:-:alternative2";
1	hq_isoforms.fasta.no5merge.collapsed.gff	exon	36418359	36418459	.	-	.	gene_id "SE:1:36413768-36414150:36414188-36418359:-"; transcript_id "SE:1:36413768-36414150:36414188-36418359:-:alternative2";
1	hq_isoforms.fasta.no5merge.collapsed.gff	exon	36413668	36413768	.	-	.	gene_id "SE:1:36413768-36414150:36414188-36418359:-"; transcript_id "SE:1:36413768-36414150:36414188-36418359:-:alternative1";
1	hq_isoforms.fasta.no5merge.collapsed.gff	exon	36414150	36414188	.	-	.	gene_id "SE:1:36413768-36414150:36414188-36418359:-"; transcript_id "SE:1:36413768-36414150:36414188-36418359:-:alternative1";
1	hq_isoforms.fasta.no5merge.collapsed.gff	exon	36418359	36418459	.	-	.	gene_id "SE:1:36413768-36414150:36414188-36418359:-"; transcript_id "SE:1:36413768-36414150:36414188-36418359:-:alternative1";
1	hq_isoforms.fasta.no5merge.collapsed.gff	exon	39380009	39380109	.	-	.	gene_id "SE:1:39380109-39385292:39385328-39389915:-"; transcript_id "SE:1:39380109-39385292:39385328-39389915:-:alternative2";
1	hq_isoforms.fasta.no5merge.collapsed.gff	exon	39389915	39390015	.	-	.	gene_id "SE:1:39380109-39385292:39385328-39389915:-"; transcript_id "SE:1:39380109-39385292:39385328-39389915:-:alternative2";
1	hq_isoforms.fasta.no5merge.collapsed.gff	exon	39380009	39380109	.	-	.	gene_id "SE:1:39380109-39385292:39385328-39389915:-"; transcript_id "SE:1:39380109-39385292:39385328-39389915:-:alternative1";
1	hq_isoforms.fasta.no5merge.collapsed.gff	exon	39385292	39385328	.	-	.	gene_id "SE:1:39380109-39385292:39385328-39389915:-"; transcript_id "SE:1:39380109-39385292:39385328-39389915:-:alternative1";
1	hq_isoforms.fasta.no5merge.collapsed.gff	exon	39389915	39390015	.	-	.	gene_id "SE:1:39380109-39385292:39385328-39389915:-"; transcript_id "SE:1:39380109-39385292:39385328-39389915:-:alternative1";
1	hq_isoforms.fasta.no5merge.collapsed.gff	exon	39380006	39380106	.	-	.	gene_id "SE:1:39380106-39385292:39385328-39389915:-"; transcript_id "SE:1:39380106-39385292:39385328-39389915:-:alternative2";
1	hq_isoforms.fasta.no5merge.collapsed.gff	exon	39389915	39390015	.	-	.	gene_id "SE:1:39380106-39385292:39385328-39389915:-"; transcript_id "SE:1:39380106-39385292:39385328-39389915:-:alternative2";
1	hq_isoforms.fasta.no5merge.collapsed.gff	exon	39380006	39380106	.	-	.	gene_id "SE:1:39380106-39385292:39385328-39389915:-"; transcript_id "SE:1:39380106-39385292:39385328-39389915:-:alternative1";
1	hq_isoforms.fasta.no5merge.collapsed.gff	exon	39385292	39385328	.	-	.	gene_id "SE:1:39380106-39385292:39385328-39389915:-"; transcript_id "SE:1:39380106-39385292:39385328-39389915:-:alternative1";
1	hq_isoforms.fasta.no5merge.collapsed.gff	exon	39389915	39390015	.	-	.	gene_id "SE:1:39380106-39385292:39385328-39389915:-"; transcript_id "SE:1:39380106-39385292:39385328-39389915:-:alternative1";
1	hq_isoforms.fasta.no5merge.collapsed.gff	exon	41139015	41139115	.	-	.	gene_id "SE:1:41139115-41142937:41143113-41143558:-"; transcript_id "SE:1:41139115-41142937:41143113-41143558:-:alternative2";
1	hq_isoforms.fasta.no5merge.collapsed.gff	exon	41143558	41143658	.	-	.	gene_id "SE:1:41139115-41142937:41143113-41143558:-"; transcript_id "SE:1:41139115-41142937:41143113-41143558:-:alternative2";
1	hq_isoforms.fasta.no5merge.collapsed.gff	exon	41139015	41139115	.	-	.	gene_id "SE:1:41139115-41142937:41143113-41143558:-"; transcript_id "SE:1:41139115-41142937:41143113-41143558:-:alternative1";
1	hq_isoforms.fasta.no5merge.collapsed.gff	exon	41142937	41143113	.	-	.	gene_id "SE:1:41139115-41142937:41143113-41143558:-"; transcript_id "SE:1:41139115-41142937:41143113-41143558:-:alternative1";
1	hq_isoforms.fasta.no5merge.collapsed.gff	exon	41143558	41143658	.	-	.	gene_id "SE:1:41139115-41142937:41143113-41143558:-"; transcript_id "SE:1:41139115-41142937:41143113-41143558:-:alternative1";
1	hq_isoforms.fasta.no5merge.collapsed.gff	exon	41120591	41120691	.	-	.	gene_id "SE:1:41120691-41121767:41121797-41125081:-"; transcript_id "SE:1:41120691-41121767:41121797-41125081:-:alternative2";
1	hq_isoforms.fasta.no5merge.collapsed.gff	exon	41125081	41125181	.	-	.	gene_id "SE:1:41120691-41121767:41121797-41125081:-"; transcript_id "SE:1:41120691-41121767:41121797-41125081:-:alternative2";
1	hq_isoforms.fasta.no5merge.collapsed.gff	exon	41120591	41120691	.	-	.	gene_id "SE:1:41120691-41121767:41121797-41125081:-"; transcript_id "SE:1:41120691-41121767:41121797-41125081:-:alternative1";
1	hq_isoforms.fasta.no5merge.collapsed.gff	exon	41121767	41121797	.	-	.	gene_id "SE:1:41120691-41121767:41121797-41125081:-"; transcript_id "SE:1:41120691-41121767:41121797-41125081:-:alternative1";
1	hq_isoforms.fasta.no5merge.collapsed.gff	exon	41125081	41125181	.	-	.	gene_id "SE:1:41120691-41121767:41121797-41125081:-"; transcript_id "SE:1:41120691-41121767:41121797-41125081:-:alternative1";
1	hq_isoforms.fasta.no5merge.collapsed.gff	exon	41143619	41143719	.	-	.	gene_id "SE:1:41143719-41145576:41145698-41149075:-"; transcript_id "SE:1:41143719-41145576:41145698-41149075:-:alternative2";
1	hq_isoforms.fasta.no5merge.collapsed.gff	exon	41149075	41149175	.	-	.	gene_id "SE:1:41143719-41145576:41145698-41149075:-"; transcript_id "SE:1:41143719-41145576:41145698-41149075:-:alternative2";
1	hq_isoforms.fasta.no5merge.collapsed.gff	exon	41143619	41143719	.	-	.	gene_id "SE:1:41143719-41145576:41145698-41149075:-"; transcript_id "SE:1:41143719-41145576:41145698-41149075:-:alternative1";
1	hq_isoforms.fasta.no5merge.collapsed.gff	exon	41145576	41145698	.	-	.	gene_id "SE:1:41143719-41145576:41145698-41149075:-"; transcript_id "SE:1:41143719-41145576:41145698-41149075:-:alternative1";
1	hq_isoforms.fasta.no5merge.collapsed.gff	exon	41149075	41149175	.	-	.	gene_id "SE:1:41143719-41145576:41145698-41149075:-"; transcript_id "SE:1:41143719-41145576:41145698-41149075:-:alternative1";
1	hq_isoforms.fasta.no5merge.collapsed.gff	exon	41120591	41120691	.	-	.	gene_id "SE:1:41120691-41121703:41121797-41125081:-"; transcript_id "SE:1:41120691-41121703:41121797-41125081:-:alternative2";
1	hq_isoforms.fasta.no5merge.collapsed.gff	exon	41125081	41125181	.	-	.	gene_id "SE:1:41120691-41121703:41121797-41125081:-"; transcript_id "SE:1:41120691-41121703:41121797-41125081:-:alternative2";
1	hq_isoforms.fasta.no5merge.collapsed.gff	exon	41120591	41120691	.	-	.	gene_id "SE:1:41120691-41121703:41121797-41125081:-"; transcript_id "SE:1:41120691-41121703:41121797-41125081:-:alternative1";
1	hq_isoforms.fasta.no5merge.collapsed.gff	exon	41121703	41121797	.	-	.	gene_id "SE:1:41120691-41121703:41121797-41125081:-"; transcript_id "SE:1:41120691-41121703:41121797-41125081:-:alternative1";
1	hq_isoforms.fasta.no5merge.collapsed.gff	exon	41125081	41125181	.	-	.	gene_id "SE:1:41120691-41121703:41121797-41125081:-"; transcript_id "SE:1:41120691-41121703:41121797-41125081:-:alternative1";
1	hq_isoforms.fasta.no5merge.collapsed.gff	exon	41139015	41139115	.	-	.	gene_id "SE:1:41139115-41142937:41143100-41143558:-"; transcript_id "SE:1:41139115-41142937:41143100-41143558:-:alternative2";
1	hq_isoforms.fasta.no5merge.collapsed.gff	exon	41143558	41143658	.	-	.	gene_id "SE:1:41139115-41142937:41143100-41143558:-"; transcript_id "SE:1:41139115-41142937:41143100-41143558:-:alternative2";
1	hq_isoforms.fasta.no5merge.collapsed.gff	exon	41139015	41139115	.	-	.	gene_id "SE:1:41139115-41142937:41143100-41143558:-"; transcript_id "SE:1:41139115-41142937:41143100-41143558:-:alternative1";
1	hq_isoforms.fasta.no5merge.collapsed.gff	exon	41142937	41143100	.	-	.	gene_id "SE:1:41139115-41142937:41143100-41143558:-"; transcript_id "SE:1:41139115-41142937:41143100-41143558:-:alternative1";
1	hq_isoforms.fasta.no5merge.collapsed.gff	exon	41143558	41143658	.	-	.	gene_id "SE:1:41139115-41142937:41143100-41143558:-"; transcript_id "SE:1:41139115-41142937:41143100-41143558:-:alternative1";
1	hq_isoforms.fasta.no5merge.collapsed.gff	exon	41614198	41614298	.	-	.	gene_id "SE:1:41614298-41616511:41616585-41616661:-"; transcript_id "SE:1:41614298-41616511:41616585-41616661:-:alternative2";
1	hq_isoforms.fasta.no5merge.collapsed.gff	exon	41616661	41616761	.	-	.	gene_id "SE:1:41614298-41616511:41616585-41616661:-"; transcript_id "SE:1:41614298-41616511:41616585-41616661:-:alternative2";
1	hq_isoforms.fasta.no5merge.collapsed.gff	exon	41614198	41614298	.	-	.	gene_id "SE:1:41614298-41616511:41616585-41616661:-"; transcript_id "SE:1:41614298-41616511:41616585-41616661:-:alternative1";
1	hq_isoforms.fasta.no5merge.collapsed.gff	exon	41616511	41616585	.	-	.	gene_id "SE:1:41614298-41616511:41616585-41616661:-"; transcript_id "SE:1:41614298-41616511:41616585-41616661:-:alternative1";
1	hq_isoforms.fasta.no5merge.collapsed.gff	exon	41616661	41616761	.	-	.	gene_id "SE:1:41614298-41616511:41616585-41616661:-"; transcript_id "SE:1:41614298-41616511:41616585-41616661:-:alternative1";
1	hq_isoforms.fasta.no5merge.collapsed.gff	exon	42135478	42135578	.	-	.	gene_id "SE:1:42135578-42135969:42136110-42137042:-"; transcript_id "SE:1:42135578-42135969:42136110-42137042:-:alternative2";
1	hq_isoforms.fasta.no5merge.collapsed.gff	exon	42137042	42137142	.	-	.	gene_id "SE:1:42135578-42135969:42136110-42137042:-"; transcript_id "SE:1:42135578-42135969:42136110-42137042:-:alternative2";
1	hq_isoforms.fasta.no5merge.collapsed.gff	exon	42135478	42135578	.	-	.	gene_id "SE:1:42135578-42135969:42136110-42137042:-"; transcript_id "SE:1:42135578-42135969:42136110-42137042:-:alternative1";
1	hq_isoforms.fasta.no5merge.collapsed.gff	exon	42135969	42136110	.	-	.	gene_id "SE:1:42135578-42135969:42136110-42137042:-"; transcript_id "SE:1:42135578-42135969:42136110-42137042:-:alternative1";
1	hq_isoforms.fasta.no5merge.collapsed.gff	exon	42137042	42137142	.	-	.	gene_id "SE:1:42135578-42135969:42136110-42137042:-"; transcript_id "SE:1:42135578-42135969:42136110-42137042:-:alternative1";
1	hq_isoforms.fasta.no5merge.collapsed.gff	exon	42135478	42135578	.	-	.	gene_id "SE:1:42135578-42135969:42136118-42137042:-"; transcript_id "SE:1:42135578-42135969:42136118-42137042:-:alternative2";
1	hq_isoforms.fasta.no5merge.collapsed.gff	exon	42137042	42137142	.	-	.	gene_id "SE:1:42135578-42135969:42136118-42137042:-"; transcript_id "SE:1:42135578-42135969:42136118-42137042:-:alternative2";
1	hq_isoforms.fasta.no5merge.collapsed.gff	exon	42135478	42135578	.	-	.	gene_id "SE:1:42135578-42135969:42136118-42137042:-"; transcript_id "SE:1:42135578-42135969:42136118-42137042:-:alternative1";
1	hq_isoforms.fasta.no5merge.collapsed.gff	exon	42135969	42136118	.	-	.	gene_id "SE:1:42135578-42135969:42136118-42137042:-"; transcript_id "SE:1:42135578-42135969:42136118-42137042:-:alternative1";
1	hq_isoforms.fasta.no5merge.collapsed.gff	exon	42137042	42137142	.	-	.	gene_id "SE:1:42135578-42135969:42136118-42137042:-"; transcript_id "SE:1:42135578-42135969:42136118-42137042:-:alternative1";
1	hq_isoforms.fasta.no5merge.collapsed.gff	exon	42159123	42159223	.	-	.	gene_id "SE:1:42159223-42162768:42162895-42165891:-"; transcript_id "SE:1:42159223-42162768:42162895-42165891:-:alternative2";
1	hq_isoforms.fasta.no5merge.collapsed.gff	exon	42165891	42165991	.	-	.	gene_id "SE:1:42159223-42162768:42162895-42165891:-"; transcript_id "SE:1:42159223-42162768:42162895-42165891:-:alternative2";
1	hq_isoforms.fasta.no5merge.collapsed.gff	exon	42159123	42159223	.	-	.	gene_id "SE:1:42159223-42162768:42162895-42165891:-"; transcript_id "SE:1:42159223-42162768:42162895-42165891:-:alternative1";
1	hq_isoforms.fasta.no5merge.collapsed.gff	exon	42162768	42162895	.	-	.	gene_id "SE:1:42159223-42162768:42162895-42165891:-"; transcript_id "SE:1:42159223-42162768:42162895-42165891:-:alternative1";
1	hq_isoforms.fasta.no5merge.collapsed.gff	exon	42165891	42165991	.	-	.	gene_id "SE:1:42159223-42162768:42162895-42165891:-"; transcript_id "SE:1:42159223-42162768:42162895-42165891:-:alternative1";
1	hq_isoforms.fasta.no5merge.collapsed.gff	exon	42421344	42421444	.	-	.	gene_id "SE:1:42421444-42422309:42422338-42423180:-"; transcript_id "SE:1:42421444-42422309:42422338-42423180:-:alternative2";
1	hq_isoforms.fasta.no5merge.collapsed.gff	exon	42423180	42423280	.	-	.	gene_id "SE:1:42421444-42422309:42422338-42423180:-"; transcript_id "SE:1:42421444-42422309:42422338-42423180:-:alternative2";
1	hq_isoforms.fasta.no5merge.collapsed.gff	exon	42421344	42421444	.	-	.	gene_id "SE:1:42421444-42422309:42422338-42423180:-"; transcript_id "SE:1:42421444-42422309:42422338-42423180:-:alternative1";
1	hq_isoforms.fasta.no5merge.collapsed.gff	exon	42422309	42422338	.	-	.	gene_id "SE:1:42421444-42422309:42422338-42423180:-"; transcript_id "SE:1:42421444-42422309:42422338-42423180:-:alternative1";
1	hq_isoforms.fasta.no5merge.collapsed.gff	exon	42423180	42423280	.	-	.	gene_id "SE:1:42421444-42422309:42422338-42423180:-"; transcript_id "SE:1:42421444-42422309:42422338-42423180:-:alternative1";
1	hq_isoforms.fasta.no5merge.collapsed.gff	exon	42678878	42678978	.	-	.	gene_id "SE:1:42678978-42697155:42697222-42698840:-"; transcript_id "SE:1:42678978-42697155:42697222-42698840:-:alternative2";
1	hq_isoforms.fasta.no5merge.collapsed.gff	exon	42698840	42698940	.	-	.	gene_id "SE:1:42678978-42697155:42697222-42698840:-"; transcript_id "SE:1:42678978-42697155:42697222-42698840:-:alternative2";
1	hq_isoforms.fasta.no5merge.collapsed.gff	exon	42678878	42678978	.	-	.	gene_id "SE:1:42678978-42697155:42697222-42698840:-"; transcript_id "SE:1:42678978-42697155:42697222-42698840:-:alternative1";
1	hq_isoforms.fasta.no5merge.collapsed.gff	exon	42697155	42697222	.	-	.	gene_id "SE:1:42678978-42697155:42697222-42698840:-"; transcript_id "SE:1:42678978-42697155:42697222-42698840:-:alternative1";
1	hq_isoforms.fasta.no5merge.collapsed.gff	exon	42698840	42698940	.	-	.	gene_id "SE:1:42678978-42697155:42697222-42698840:-"; transcript_id "SE:1:42678978-42697155:42697222-42698840:-:alternative1";
1	hq_isoforms.fasta.no5merge.collapsed.gff	exon	42697122	42697222	.	-	.	gene_id "SE:1:42697222-42698840:42699475-42700990:-"; transcript_id "SE:1:42697222-42698840:42699475-42700990:-:alternative2";
1	hq_isoforms.fasta.no5merge.collapsed.gff	exon	42700990	42701090	.	-	.	gene_id "SE:1:42697222-42698840:42699475-42700990:-"; transcript_id "SE:1:42697222-42698840:42699475-42700990:-:alternative2";
1	hq_isoforms.fasta.no5merge.collapsed.gff	exon	42697122	42697222	.	-	.	gene_id "SE:1:42697222-42698840:42699475-42700990:-"; transcript_id "SE:1:42697222-42698840:42699475-42700990:-:alternative1";
1	hq_isoforms.fasta.no5merge.collapsed.gff	exon	42698840	42699475	.	-	.	gene_id "SE:1:42697222-42698840:42699475-42700990:-"; transcript_id "SE:1:42697222-42698840:42699475-42700990:-:alternative1";
1	hq_isoforms.fasta.no5merge.collapsed.gff	exon	42700990	42701090	.	-	.	gene_id "SE:1:42697222-42698840:42699475-42700990:-"; transcript_id "SE:1:42697222-42698840:42699475-42700990:-:alternative1";
1	hq_isoforms.fasta.no5merge.collapsed.gff	exon	43589737	43589837	.	-	.	gene_id "SE:1:43589837-43590871:43591039-43591491:-"; transcript_id "SE:1:43589837-43590871:43591039-43591491:-:alternative2";
1	hq_isoforms.fasta.no5merge.collapsed.gff	exon	43591491	43591591	.	-	.	gene_id "SE:1:43589837-43590871:43591039-43591491:-"; transcript_id "SE:1:43589837-43590871:43591039-43591491:-:alternative2";
1	hq_isoforms.fasta.no5merge.collapsed.gff	exon	43589737	43589837	.	-	.	gene_id "SE:1:43589837-43590871:43591039-43591491:-"; transcript_id "SE:1:43589837-43590871:43591039-43591491:-:alternative1";
1	hq_isoforms.fasta.no5merge.collapsed.gff	exon	43590871	43591039	.	-	.	gene_id "SE:1:43589837-43590871:43591039-43591491:-"; transcript_id "SE:1:43589837-43590871:43591039-43591491:-:alternative1";
1	hq_isoforms.fasta.no5merge.collapsed.gff	exon	43591491	43591591	.	-	.	gene_id "SE:1:43589837-43590871:43591039-43591491:-"; transcript_id "SE:1:43589837-43590871:43591039-43591491:-:alternative1";
1	hq_isoforms.fasta.no5merge.collapsed.gff	exon	43663601	43663701	.	-	.	gene_id "SE:1:43663701-43664459:43664671-43679236:-"; transcript_id "SE:1:43663701-43664459:43664671-43679236:-:alternative2";
1	hq_isoforms.fasta.no5merge.collapsed.gff	exon	43679236	43679336	.	-	.	gene_id "SE:1:43663701-43664459:43664671-43679236:-"; transcript_id "SE:1:43663701-43664459:43664671-43679236:-:alternative2";
1	hq_isoforms.fasta.no5merge.collapsed.gff	exon	43663601	43663701	.	-	.	gene_id "SE:1:43663701-43664459:43664671-43679236:-"; transcript_id "SE:1:43663701-43664459:43664671-43679236:-:alternative1";
1	hq_isoforms.fasta.no5merge.collapsed.gff	exon	43664459	43664671	.	-	.	gene_id "SE:1:43663701-43664459:43664671-43679236:-"; transcript_id "SE:1:43663701-43664459:43664671-43679236:-:alternative1";
1	hq_isoforms.fasta.no5merge.collapsed.gff	exon	43679236	43679336	.	-	.	gene_id "SE:1:43663701-43664459:43664671-43679236:-"; transcript_id "SE:1:43663701-43664459:43664671-43679236:-:alternative1";
1	hq_isoforms.fasta.no5merge.collapsed.gff	exon	43681968	43682068	.	-	.	gene_id "SE:1:43682068-43684583:43684738-43687758:-"; transcript_id "SE:1:43682068-43684583:43684738-43687758:-:alternative2";
1	hq_isoforms.fasta.no5merge.collapsed.gff	exon	43687758	43687858	.	-	.	gene_id "SE:1:43682068-43684583:43684738-43687758:-"; transcript_id "SE:1:43682068-43684583:43684738-43687758:-:alternative2";
1	hq_isoforms.fasta.no5merge.collapsed.gff	exon	43681968	43682068	.	-	.	gene_id "SE:1:43682068-43684583:43684738-43687758:-"; transcript_id "SE:1:43682068-43684583:43684738-43687758:-:alternative1";
1	hq_isoforms.fasta.no5merge.collapsed.gff	exon	43684583	43684738	.	-	.	gene_id "SE:1:43682068-43684583:43684738-43687758:-"; transcript_id "SE:1:43682068-43684583:43684738-43687758:-:alternative1";
1	hq_isoforms.fasta.no5merge.collapsed.gff	exon	43687758	43687858	.	-	.	gene_id "SE:1:43682068-43684583:43684738-43687758:-"; transcript_id "SE:1:43682068-43684583:43684738-43687758:-:alternative1";
1	hq_isoforms.fasta.no5merge.collapsed.gff	exon	45602430	45602530	.	-	.	gene_id "SE:1:45602530-45605643:45605816-45610623:-"; transcript_id "SE:1:45602530-45605643:45605816-45610623:-:alternative2";
1	hq_isoforms.fasta.no5merge.collapsed.gff	exon	45610623	45610723	.	-	.	gene_id "SE:1:45602530-45605643:45605816-45610623:-"; transcript_id "SE:1:45602530-45605643:45605816-45610623:-:alternative2";
1	hq_isoforms.fasta.no5merge.collapsed.gff	exon	45602430	45602530	.	-	.	gene_id "SE:1:45602530-45605643:45605816-45610623:-"; transcript_id "SE:1:45602530-45605643:45605816-45610623:-:alternative1";
1	hq_isoforms.fasta.no5merge.collapsed.gff	exon	45605643	45605816	.	-	.	gene_id "SE:1:45602530-45605643:45605816-45610623:-"; transcript_id "SE:1:45602530-45605643:45605816-45610623:-:alternative1";
1	hq_isoforms.fasta.no5merge.collapsed.gff	exon	45610623	45610723	.	-	.	gene_id "SE:1:45602530-45605643:45605816-45610623:-"; transcript_id "SE:1:45602530-45605643:45605816-45610623:-:alternative1";
1	hq_isoforms.fasta.no5merge.collapsed.gff	exon	45619095	45619195	.	-	.	gene_id "SE:1:45619195-45619312:45619424-45620285:-"; transcript_id "SE:1:45619195-45619312:45619424-45620285:-:alternative2";
1	hq_isoforms.fasta.no5merge.collapsed.gff	exon	45620285	45620385	.	-	.	gene_id "SE:1:45619195-45619312:45619424-45620285:-"; transcript_id "SE:1:45619195-45619312:45619424-45620285:-:alternative2";
1	hq_isoforms.fasta.no5merge.collapsed.gff	exon	45619095	45619195	.	-	.	gene_id "SE:1:45619195-45619312:45619424-45620285:-"; transcript_id "SE:1:45619195-45619312:45619424-45620285:-:alternative1";
1	hq_isoforms.fasta.no5merge.collapsed.gff	exon	45619312	45619424	.	-	.	gene_id "SE:1:45619195-45619312:45619424-45620285:-"; transcript_id "SE:1:45619195-45619312:45619424-45620285:-:alternative1";
1	hq_isoforms.fasta.no5merge.collapsed.gff	exon	45620285	45620385	.	-	.	gene_id "SE:1:45619195-45619312:45619424-45620285:-"; transcript_id "SE:1:45619195-45619312:45619424-45620285:-:alternative1";
1	hq_isoforms.fasta.no5merge.collapsed.gff	exon	45600298	45600398	.	-	.	gene_id "SE:1:45600398-45602438:45602530-45610623:-"; transcript_id "SE:1:45600398-45602438:45602530-45610623:-:alternative2";
1	hq_isoforms.fasta.no5merge.collapsed.gff	exon	45610623	45610723	.	-	.	gene_id "SE:1:45600398-45602438:45602530-45610623:-"; transcript_id "SE:1:45600398-45602438:45602530-45610623:-:alternative2";
1	hq_isoforms.fasta.no5merge.collapsed.gff	exon	45600298	45600398	.	-	.	gene_id "SE:1:45600398-45602438:45602530-45610623:-"; transcript_id "SE:1:45600398-45602438:45602530-45610623:-:alternative1";
1	hq_isoforms.fasta.no5merge.collapsed.gff	exon	45602438	45602530	.	-	.	gene_id "SE:1:45600398-45602438:45602530-45610623:-"; transcript_id "SE:1:45600398-45602438:45602530-45610623:-:alternative1";
1	hq_isoforms.fasta.no5merge.collapsed.gff	exon	45610623	45610723	.	-	.	gene_id "SE:1:45600398-45602438:45602530-45610623:-"; transcript_id "SE:1:45600398-45602438:45602530-45610623:-:alternative1";
1	hq_isoforms.fasta.no5merge.collapsed.gff	exon	46110205	46110305	.	-	.	gene_id "SE:1:46110305-46113084:46113189-46117797:-"; transcript_id "SE:1:46110305-46113084:46113189-46117797:-:alternative2";
1	hq_isoforms.fasta.no5merge.collapsed.gff	exon	46117797	46117897	.	-	.	gene_id "SE:1:46110305-46113084:46113189-46117797:-"; transcript_id "SE:1:46110305-46113084:46113189-46117797:-:alternative2";
1	hq_isoforms.fasta.no5merge.collapsed.gff	exon	46110205	46110305	.	-	.	gene_id "SE:1:46110305-46113084:46113189-46117797:-"; transcript_id "SE:1:46110305-46113084:46113189-46117797:-:alternative1";
1	hq_isoforms.fasta.no5merge.collapsed.gff	exon	46113084	46113189	.	-	.	gene_id "SE:1:46110305-46113084:46113189-46117797:-"; transcript_id "SE:1:46110305-46113084:46113189-46117797:-:alternative1";
1	hq_isoforms.fasta.no5merge.collapsed.gff	exon	46117797	46117897	.	-	.	gene_id "SE:1:46110305-46113084:46113189-46117797:-"; transcript_id "SE:1:46110305-46113084:46113189-46117797:-:alternative1";
1	hq_isoforms.fasta.no5merge.collapsed.gff	exon	46105996	46106096	.	-	.	gene_id "SE:1:46106096-46107451:46107519-46107641:-"; transcript_id "SE:1:46106096-46107451:46107519-46107641:-:alternative2";
1	hq_isoforms.fasta.no5merge.collapsed.gff	exon	46107641	46107741	.	-	.	gene_id "SE:1:46106096-46107451:46107519-46107641:-"; transcript_id "SE:1:46106096-46107451:46107519-46107641:-:alternative2";
1	hq_isoforms.fasta.no5merge.collapsed.gff	exon	46105996	46106096	.	-	.	gene_id "SE:1:46106096-46107451:46107519-46107641:-"; transcript_id "SE:1:46106096-46107451:46107519-46107641:-:alternative1";
1	hq_isoforms.fasta.no5merge.collapsed.gff	exon	46107451	46107519	.	-	.	gene_id "SE:1:46106096-46107451:46107519-46107641:-"; transcript_id "SE:1:46106096-46107451:46107519-46107641:-:alternative1";
1	hq_isoforms.fasta.no5merge.collapsed.gff	exon	46107641	46107741	.	-	.	gene_id "SE:1:46106096-46107451:46107519-46107641:-"; transcript_id "SE:1:46106096-46107451:46107519-46107641:-:alternative1";
1	hq_isoforms.fasta.no5merge.collapsed.gff	exon	48809319	48809419	.	-	.	gene_id "SE:1:48809419-48810546:48810649-48811458:-"; transcript_id "SE:1:48809419-48810546:48810649-48811458:-:alternative2";
1	hq_isoforms.fasta.no5merge.collapsed.gff	exon	48811458	48811558	.	-	.	gene_id "SE:1:48809419-48810546:48810649-48811458:-"; transcript_id "SE:1:48809419-48810546:48810649-48811458:-:alternative2";
1	hq_isoforms.fasta.no5merge.collapsed.gff	exon	48809319	48809419	.	-	.	gene_id "SE:1:48809419-48810546:48810649-48811458:-"; transcript_id "SE:1:48809419-48810546:48810649-48811458:-:alternative1";
1	hq_isoforms.fasta.no5merge.collapsed.gff	exon	48810546	48810649	.	-	.	gene_id "SE:1:48809419-48810546:48810649-48811458:-"; transcript_id "SE:1:48809419-48810546:48810649-48811458:-:alternative1";
1	hq_isoforms.fasta.no5merge.collapsed.gff	exon	48811458	48811558	.	-	.	gene_id "SE:1:48809419-48810546:48810649-48811458:-"; transcript_id "SE:1:48809419-48810546:48810649-48811458:-:alternative1";
1	hq_isoforms.fasta.no5merge.collapsed.gff	exon	48830835	48830935	.	-	.	gene_id "SE:1:48830935-48831782:48831870-48840112:-"; transcript_id "SE:1:48830935-48831782:48831870-48840112:-:alternative2";
1	hq_isoforms.fasta.no5merge.collapsed.gff	exon	48840112	48840212	.	-	.	gene_id "SE:1:48830935-48831782:48831870-48840112:-"; transcript_id "SE:1:48830935-48831782:48831870-48840112:-:alternative2";
1	hq_isoforms.fasta.no5merge.collapsed.gff	exon	48830835	48830935	.	-	.	gene_id "SE:1:48830935-48831782:48831870-48840112:-"; transcript_id "SE:1:48830935-48831782:48831870-48840112:-:alternative1";
1	hq_isoforms.fasta.no5merge.collapsed.gff	exon	48831782	48831870	.	-	.	gene_id "SE:1:48830935-48831782:48831870-48840112:-"; transcript_id "SE:1:48830935-48831782:48831870-48840112:-:alternative1";
1	hq_isoforms.fasta.no5merge.collapsed.gff	exon	48840112	48840212	.	-	.	gene_id "SE:1:48830935-48831782:48831870-48840112:-"; transcript_id "SE:1:48830935-48831782:48831870-48840112:-:alternative1";
1	hq_isoforms.fasta.no5merge.collapsed.gff	exon	48831770	48831870	.	-	.	gene_id "SE:1:48831870-48837712:48837914-48840112:-"; transcript_id "SE:1:48831870-48837712:48837914-48840112:-:alternative2";
1	hq_isoforms.fasta.no5merge.collapsed.gff	exon	48840112	48840212	.	-	.	gene_id "SE:1:48831870-48837712:48837914-48840112:-"; transcript_id "SE:1:48831870-48837712:48837914-48840112:-:alternative2";
1	hq_isoforms.fasta.no5merge.collapsed.gff	exon	48831770	48831870	.	-	.	gene_id "SE:1:48831870-48837712:48837914-48840112:-"; transcript_id "SE:1:48831870-48837712:48837914-48840112:-:alternative1";
1	hq_isoforms.fasta.no5merge.collapsed.gff	exon	48837712	48837914	.	-	.	gene_id "SE:1:48831870-48837712:48837914-48840112:-"; transcript_id "SE:1:48831870-48837712:48837914-48840112:-:alternative1";
1	hq_isoforms.fasta.no5merge.collapsed.gff	exon	48840112	48840212	.	-	.	gene_id "SE:1:48831870-48837712:48837914-48840112:-"; transcript_id "SE:1:48831870-48837712:48837914-48840112:-:alternative1";
1	hq_isoforms.fasta.no5merge.collapsed.gff	exon	48898524	48898624	.	-	.	gene_id "SE:1:48898624-48898888:48899090-48900846:-"; transcript_id "SE:1:48898624-48898888:48899090-48900846:-:alternative2";
1	hq_isoforms.fasta.no5merge.collapsed.gff	exon	48900846	48900946	.	-	.	gene_id "SE:1:48898624-48898888:48899090-48900846:-"; transcript_id "SE:1:48898624-48898888:48899090-48900846:-:alternative2";
1	hq_isoforms.fasta.no5merge.collapsed.gff	exon	48898524	48898624	.	-	.	gene_id "SE:1:48898624-48898888:48899090-48900846:-"; transcript_id "SE:1:48898624-48898888:48899090-48900846:-:alternative1";
1	hq_isoforms.fasta.no5merge.collapsed.gff	exon	48898888	48899090	.	-	.	gene_id "SE:1:48898624-48898888:48899090-48900846:-"; transcript_id "SE:1:48898624-48898888:48899090-48900846:-:alternative1";
1	hq_isoforms.fasta.no5merge.collapsed.gff	exon	48900846	48900946	.	-	.	gene_id "SE:1:48898624-48898888:48899090-48900846:-"; transcript_id "SE:1:48898624-48898888:48899090-48900846:-:alternative1";
1	hq_isoforms.fasta.no5merge.collapsed.gff	exon	52336399	52336499	.	-	.	gene_id "SE:1:52336499-52340740:52340898-52341835:-"; transcript_id "SE:1:52336499-52340740:52340898-52341835:-:alternative2";
1	hq_isoforms.fasta.no5merge.collapsed.gff	exon	52341835	52341935	.	-	.	gene_id "SE:1:52336499-52340740:52340898-52341835:-"; transcript_id "SE:1:52336499-52340740:52340898-52341835:-:alternative2";
1	hq_isoforms.fasta.no5merge.collapsed.gff	exon	52336399	52336499	.	-	.	gene_id "SE:1:52336499-52340740:52340898-52341835:-"; transcript_id "SE:1:52336499-52340740:52340898-52341835:-:alternative1";
1	hq_isoforms.fasta.no5merge.collapsed.gff	exon	52340740	52340898	.	-	.	gene_id "SE:1:52336499-52340740:52340898-52341835:-"; transcript_id "SE:1:52336499-52340740:52340898-52341835:-:alternative1";
1	hq_isoforms.fasta.no5merge.collapsed.gff	exon	52341835	52341935	.	-	.	gene_id "SE:1:52336499-52340740:52340898-52341835:-"; transcript_id "SE:1:52336499-52340740:52340898-52341835:-:alternative1";
1	hq_isoforms.fasta.no5merge.collapsed.gff	exon	51254177	51254277	.	-	.	gene_id "SE:1:51254277-51254427:51254542-51256861:-"; transcript_id "SE:1:51254277-51254427:51254542-51256861:-:alternative2";
1	hq_isoforms.fasta.no5merge.collapsed.gff	exon	51256861	51256961	.	-	.	gene_id "SE:1:51254277-51254427:51254542-51256861:-"; transcript_id "SE:1:51254277-51254427:51254542-51256861:-:alternative2";
1	hq_isoforms.fasta.no5merge.collapsed.gff	exon	51254177	51254277	.	-	.	gene_id "SE:1:51254277-51254427:51254542-51256861:-"; transcript_id "SE:1:51254277-51254427:51254542-51256861:-:alternative1";
1	hq_isoforms.fasta.no5merge.collapsed.gff	exon	51254427	51254542	.	-	.	gene_id "SE:1:51254277-51254427:51254542-51256861:-"; transcript_id "SE:1:51254277-51254427:51254542-51256861:-:alternative1";
1	hq_isoforms.fasta.no5merge.collapsed.gff	exon	51256861	51256961	.	-	.	gene_id "SE:1:51254277-51254427:51254542-51256861:-"; transcript_id "SE:1:51254277-51254427:51254542-51256861:-:alternative1";
1	hq_isoforms.fasta.no5merge.collapsed.gff	exon	51256855	51256955	.	-	.	gene_id "SE:1:51256955-51266502:51266721-51281649:-"; transcript_id "SE:1:51256955-51266502:51266721-51281649:-:alternative2";
1	hq_isoforms.fasta.no5merge.collapsed.gff	exon	51281649	51281749	.	-	.	gene_id "SE:1:51256955-51266502:51266721-51281649:-"; transcript_id "SE:1:51256955-51266502:51266721-51281649:-:alternative2";
1	hq_isoforms.fasta.no5merge.collapsed.gff	exon	51256855	51256955	.	-	.	gene_id "SE:1:51256955-51266502:51266721-51281649:-"; transcript_id "SE:1:51256955-51266502:51266721-51281649:-:alternative1";
1	hq_isoforms.fasta.no5merge.collapsed.gff	exon	51266502	51266721	.	-	.	gene_id "SE:1:51256955-51266502:51266721-51281649:-"; transcript_id "SE:1:51256955-51266502:51266721-51281649:-:alternative1";
1	hq_isoforms.fasta.no5merge.collapsed.gff	exon	51281649	51281749	.	-	.	gene_id "SE:1:51256955-51266502:51266721-51281649:-"; transcript_id "SE:1:51256955-51266502:51266721-51281649:-:alternative1";
1	hq_isoforms.fasta.no5merge.collapsed.gff	exon	51877754	51877854	.	-	.	gene_id "SE:1:51877854-51881175:51881326-51889507:-"; transcript_id "SE:1:51877854-51881175:51881326-51889507:-:alternative2";
1	hq_isoforms.fasta.no5merge.collapsed.gff	exon	51889507	51889607	.	-	.	gene_id "SE:1:51877854-51881175:51881326-51889507:-"; transcript_id "SE:1:51877854-51881175:51881326-51889507:-:alternative2";
1	hq_isoforms.fasta.no5merge.collapsed.gff	exon	51877754	51877854	.	-	.	gene_id "SE:1:51877854-51881175:51881326-51889507:-"; transcript_id "SE:1:51877854-51881175:51881326-51889507:-:alternative1";
1	hq_isoforms.fasta.no5merge.collapsed.gff	exon	51881175	51881326	.	-	.	gene_id "SE:1:51877854-51881175:51881326-51889507:-"; transcript_id "SE:1:51877854-51881175:51881326-51889507:-:alternative1";
1	hq_isoforms.fasta.no5merge.collapsed.gff	exon	51889507	51889607	.	-	.	gene_id "SE:1:51877854-51881175:51881326-51889507:-"; transcript_id "SE:1:51877854-51881175:51881326-51889507:-:alternative1";
1	hq_isoforms.fasta.no5merge.collapsed.gff	exon	51891702	51891802	.	-	.	gene_id "SE:1:51891802-51893506:51893621-51902677:-"; transcript_id "SE:1:51891802-51893506:51893621-51902677:-:alternative2";
1	hq_isoforms.fasta.no5merge.collapsed.gff	exon	51902677	51902777	.	-	.	gene_id "SE:1:51891802-51893506:51893621-51902677:-"; transcript_id "SE:1:51891802-51893506:51893621-51902677:-:alternative2";
1	hq_isoforms.fasta.no5merge.collapsed.gff	exon	51891702	51891802	.	-	.	gene_id "SE:1:51891802-51893506:51893621-51902677:-"; transcript_id "SE:1:51891802-51893506:51893621-51902677:-:alternative1";
1	hq_isoforms.fasta.no5merge.collapsed.gff	exon	51893506	51893621	.	-	.	gene_id "SE:1:51891802-51893506:51893621-51902677:-"; transcript_id "SE:1:51891802-51893506:51893621-51902677:-:alternative1";
1	hq_isoforms.fasta.no5merge.collapsed.gff	exon	51902677	51902777	.	-	.	gene_id "SE:1:51891802-51893506:51893621-51902677:-"; transcript_id "SE:1:51891802-51893506:51893621-51902677:-:alternative1";
1	hq_isoforms.fasta.no5merge.collapsed.gff	exon	51935582	51935682	.	-	.	gene_id "SE:1:51935682-51936629:51936694-51937414:-"; transcript_id "SE:1:51935682-51936629:51936694-51937414:-:alternative2";
1	hq_isoforms.fasta.no5merge.collapsed.gff	exon	51937414	51937514	.	-	.	gene_id "SE:1:51935682-51936629:51936694-51937414:-"; transcript_id "SE:1:51935682-51936629:51936694-51937414:-:alternative2";
1	hq_isoforms.fasta.no5merge.collapsed.gff	exon	51935582	51935682	.	-	.	gene_id "SE:1:51935682-51936629:51936694-51937414:-"; transcript_id "SE:1:51935682-51936629:51936694-51937414:-:alternative1";
1	hq_isoforms.fasta.no5merge.collapsed.gff	exon	51936629	51936694	.	-	.	gene_id "SE:1:51935682-51936629:51936694-51937414:-"; transcript_id "SE:1:51935682-51936629:51936694-51937414:-:alternative1";
1	hq_isoforms.fasta.no5merge.collapsed.gff	exon	51937414	51937514	.	-	.	gene_id "SE:1:51935682-51936629:51936694-51937414:-"; transcript_id "SE:1:51935682-51936629:51936694-51937414:-:alternative1";
1	hq_isoforms.fasta.no5merge.collapsed.gff	exon	51937548	51937648	.	-	.	gene_id "SE:1:51937648-51939205:51939287-51940147:-"; transcript_id "SE:1:51937648-51939205:51939287-51940147:-:alternative2";
1	hq_isoforms.fasta.no5merge.collapsed.gff	exon	51940147	51940247	.	-	.	gene_id "SE:1:51937648-51939205:51939287-51940147:-"; transcript_id "SE:1:51937648-51939205:51939287-51940147:-:alternative2";
1	hq_isoforms.fasta.no5merge.collapsed.gff	exon	51937548	51937648	.	-	.	gene_id "SE:1:51937648-51939205:51939287-51940147:-"; transcript_id "SE:1:51937648-51939205:51939287-51940147:-:alternative1";
1	hq_isoforms.fasta.no5merge.collapsed.gff	exon	51939205	51939287	.	-	.	gene_id "SE:1:51937648-51939205:51939287-51940147:-"; transcript_id "SE:1:51937648-51939205:51939287-51940147:-:alternative1";
1	hq_isoforms.fasta.no5merge.collapsed.gff	exon	51940147	51940247	.	-	.	gene_id "SE:1:51937648-51939205:51939287-51940147:-"; transcript_id "SE:1:51937648-51939205:51939287-51940147:-:alternative1";
1	hq_isoforms.fasta.no5merge.collapsed.gff	exon	52322821	52322921	.	-	.	gene_id "SE:1:52322921-52324018:52324143-52327731:-"; transcript_id "SE:1:52322921-52324018:52324143-52327731:-:alternative2";
1	hq_isoforms.fasta.no5merge.collapsed.gff	exon	52327731	52327831	.	-	.	gene_id "SE:1:52322921-52324018:52324143-52327731:-"; transcript_id "SE:1:52322921-52324018:52324143-52327731:-:alternative2";
1	hq_isoforms.fasta.no5merge.collapsed.gff	exon	52322821	52322921	.	-	.	gene_id "SE:1:52322921-52324018:52324143-52327731:-"; transcript_id "SE:1:52322921-52324018:52324143-52327731:-:alternative1";
1	hq_isoforms.fasta.no5merge.collapsed.gff	exon	52324018	52324143	.	-	.	gene_id "SE:1:52322921-52324018:52324143-52327731:-"; transcript_id "SE:1:52322921-52324018:52324143-52327731:-:alternative1";
1	hq_isoforms.fasta.no5merge.collapsed.gff	exon	52327731	52327831	.	-	.	gene_id "SE:1:52322921-52324018:52324143-52327731:-"; transcript_id "SE:1:52322921-52324018:52324143-52327731:-:alternative1";
1	hq_isoforms.fasta.no5merge.collapsed.gff	exon	52358998	52359098	.	-	.	gene_id "SE:1:52359098-52402188:52402255-52421091:-"; transcript_id "SE:1:52359098-52402188:52402255-52421091:-:alternative2";
1	hq_isoforms.fasta.no5merge.collapsed.gff	exon	52421091	52421191	.	-	.	gene_id "SE:1:52359098-52402188:52402255-52421091:-"; transcript_id "SE:1:52359098-52402188:52402255-52421091:-:alternative2";
1	hq_isoforms.fasta.no5merge.collapsed.gff	exon	52358998	52359098	.	-	.	gene_id "SE:1:52359098-52402188:52402255-52421091:-"; transcript_id "SE:1:52359098-52402188:52402255-52421091:-:alternative1";
1	hq_isoforms.fasta.no5merge.collapsed.gff	exon	52402188	52402255	.	-	.	gene_id "SE:1:52359098-52402188:52402255-52421091:-"; transcript_id "SE:1:52359098-52402188:52402255-52421091:-:alternative1";
1	hq_isoforms.fasta.no5merge.collapsed.gff	exon	52421091	52421191	.	-	.	gene_id "SE:1:52359098-52402188:52402255-52421091:-"; transcript_id "SE:1:52359098-52402188:52402255-52421091:-:alternative1";
1	hq_isoforms.fasta.no5merge.collapsed.gff	exon	52336399	52336499	.	-	.	gene_id "SE:1:52336499-52338699:52338743-52340740:-"; transcript_id "SE:1:52336499-52338699:52338743-52340740:-:alternative2";
1	hq_isoforms.fasta.no5merge.collapsed.gff	exon	52340740	52340840	.	-	.	gene_id "SE:1:52336499-52338699:52338743-52340740:-"; transcript_id "SE:1:52336499-52338699:52338743-52340740:-:alternative2";
1	hq_isoforms.fasta.no5merge.collapsed.gff	exon	52336399	52336499	.	-	.	gene_id "SE:1:52336499-52338699:52338743-52340740:-"; transcript_id "SE:1:52336499-52338699:52338743-52340740:-:alternative1";
1	hq_isoforms.fasta.no5merge.collapsed.gff	exon	52338699	52338743	.	-	.	gene_id "SE:1:52336499-52338699:52338743-52340740:-"; transcript_id "SE:1:52336499-52338699:52338743-52340740:-:alternative1";
1	hq_isoforms.fasta.no5merge.collapsed.gff	exon	52340740	52340840	.	-	.	gene_id "SE:1:52336499-52338699:52338743-52340740:-"; transcript_id "SE:1:52336499-52338699:52338743-52340740:-:alternative1";
1	hq_isoforms.fasta.no5merge.collapsed.gff	exon	52324043	52324143	.	-	.	gene_id "SE:1:52324143-52326392:52326561-52327731:-"; transcript_id "SE:1:52324143-52326392:52326561-52327731:-:alternative2";
1	hq_isoforms.fasta.no5merge.collapsed.gff	exon	52327731	52327831	.	-	.	gene_id "SE:1:52324143-52326392:52326561-52327731:-"; transcript_id "SE:1:52324143-52326392:52326561-52327731:-:alternative2";
1	hq_isoforms.fasta.no5merge.collapsed.gff	exon	52324043	52324143	.	-	.	gene_id "SE:1:52324143-52326392:52326561-52327731:-"; transcript_id "SE:1:52324143-52326392:52326561-52327731:-:alternative1";
1	hq_isoforms.fasta.no5merge.collapsed.gff	exon	52326392	52326561	.	-	.	gene_id "SE:1:52324143-52326392:52326561-52327731:-"; transcript_id "SE:1:52324143-52326392:52326561-52327731:-:alternative1";
1	hq_isoforms.fasta.no5merge.collapsed.gff	exon	52327731	52327831	.	-	.	gene_id "SE:1:52324143-52326392:52326561-52327731:-"; transcript_id "SE:1:52324143-52326392:52326561-52327731:-:alternative1";
1	hq_isoforms.fasta.no5merge.collapsed.gff	exon	52852539	52852639	.	-	.	gene_id "SE:1:52852639-52853323:52853409-52854481:-"; transcript_id "SE:1:52852639-52853323:52853409-52854481:-:alternative2";
1	hq_isoforms.fasta.no5merge.collapsed.gff	exon	52854481	52854581	.	-	.	gene_id "SE:1:52852639-52853323:52853409-52854481:-"; transcript_id "SE:1:52852639-52853323:52853409-52854481:-:alternative2";
1	hq_isoforms.fasta.no5merge.collapsed.gff	exon	52852539	52852639	.	-	.	gene_id "SE:1:52852639-52853323:52853409-52854481:-"; transcript_id "SE:1:52852639-52853323:52853409-52854481:-:alternative1";
1	hq_isoforms.fasta.no5merge.collapsed.gff	exon	52853323	52853409	.	-	.	gene_id "SE:1:52852639-52853323:52853409-52854481:-"; transcript_id "SE:1:52852639-52853323:52853409-52854481:-:alternative1";
1	hq_isoforms.fasta.no5merge.collapsed.gff	exon	52854481	52854581	.	-	.	gene_id "SE:1:52852639-52853323:52853409-52854481:-"; transcript_id "SE:1:52852639-52853323:52853409-52854481:-:alternative1";
1	hq_isoforms.fasta.no5merge.collapsed.gff	exon	53327835	53327935	.	-	.	gene_id "SE:1:53327935-53328852:53328899-53328990:-"; transcript_id "SE:1:53327935-53328852:53328899-53328990:-:alternative2";
1	hq_isoforms.fasta.no5merge.collapsed.gff	exon	53328990	53329090	.	-	.	gene_id "SE:1:53327935-53328852:53328899-53328990:-"; transcript_id "SE:1:53327935-53328852:53328899-53328990:-:alternative2";
1	hq_isoforms.fasta.no5merge.collapsed.gff	exon	53327835	53327935	.	-	.	gene_id "SE:1:53327935-53328852:53328899-53328990:-"; transcript_id "SE:1:53327935-53328852:53328899-53328990:-:alternative1";
1	hq_isoforms.fasta.no5merge.collapsed.gff	exon	53328852	53328899	.	-	.	gene_id "SE:1:53327935-53328852:53328899-53328990:-"; transcript_id "SE:1:53327935-53328852:53328899-53328990:-:alternative1";
1	hq_isoforms.fasta.no5merge.collapsed.gff	exon	53328990	53329090	.	-	.	gene_id "SE:1:53327935-53328852:53328899-53328990:-"; transcript_id "SE:1:53327935-53328852:53328899-53328990:-:alternative1";
1	hq_isoforms.fasta.no5merge.collapsed.gff	exon	54359416	54359516	.	-	.	gene_id "SE:1:54359516-54361196:54361258-54361701:-"; transcript_id "SE:1:54359516-54361196:54361258-54361701:-:alternative2";
1	hq_isoforms.fasta.no5merge.collapsed.gff	exon	54361701	54361801	.	-	.	gene_id "SE:1:54359516-54361196:54361258-54361701:-"; transcript_id "SE:1:54359516-54361196:54361258-54361701:-:alternative2";
1	hq_isoforms.fasta.no5merge.collapsed.gff	exon	54359416	54359516	.	-	.	gene_id "SE:1:54359516-54361196:54361258-54361701:-"; transcript_id "SE:1:54359516-54361196:54361258-54361701:-:alternative1";
1	hq_isoforms.fasta.no5merge.collapsed.gff	exon	54361196	54361258	.	-	.	gene_id "SE:1:54359516-54361196:54361258-54361701:-"; transcript_id "SE:1:54359516-54361196:54361258-54361701:-:alternative1";
1	hq_isoforms.fasta.no5merge.collapsed.gff	exon	54361701	54361801	.	-	.	gene_id "SE:1:54359516-54361196:54361258-54361701:-"; transcript_id "SE:1:54359516-54361196:54361258-54361701:-:alternative1";
1	hq_isoforms.fasta.no5merge.collapsed.gff	exon	55853342	55853442	.	-	.	gene_id "SE:1:55853442-55857675:55857744-55861423:-"; transcript_id "SE:1:55853442-55857675:55857744-55861423:-:alternative2";
1	hq_isoforms.fasta.no5merge.collapsed.gff	exon	55861423	55861523	.	-	.	gene_id "SE:1:55853442-55857675:55857744-55861423:-"; transcript_id "SE:1:55853442-55857675:55857744-55861423:-:alternative2";
1	hq_isoforms.fasta.no5merge.collapsed.gff	exon	55853342	55853442	.	-	.	gene_id "SE:1:55853442-55857675:55857744-55861423:-"; transcript_id "SE:1:55853442-55857675:55857744-55861423:-:alternative1";
1	hq_isoforms.fasta.no5merge.collapsed.gff	exon	55857675	55857744	.	-	.	gene_id "SE:1:55853442-55857675:55857744-55861423:-"; transcript_id "SE:1:55853442-55857675:55857744-55861423:-:alternative1";
1	hq_isoforms.fasta.no5merge.collapsed.gff	exon	55861423	55861523	.	-	.	gene_id "SE:1:55853442-55857675:55857744-55861423:-"; transcript_id "SE:1:55853442-55857675:55857744-55861423:-:alternative1";
1	hq_isoforms.fasta.no5merge.collapsed.gff	exon	55862557	55862657	.	-	.	gene_id "SE:1:55862657-55863645:55863798-55864956:-"; transcript_id "SE:1:55862657-55863645:55863798-55864956:-:alternative2";
1	hq_isoforms.fasta.no5merge.collapsed.gff	exon	55864956	55865056	.	-	.	gene_id "SE:1:55862657-55863645:55863798-55864956:-"; transcript_id "SE:1:55862657-55863645:55863798-55864956:-:alternative2";
1	hq_isoforms.fasta.no5merge.collapsed.gff	exon	55862557	55862657	.	-	.	gene_id "SE:1:55862657-55863645:55863798-55864956:-"; transcript_id "SE:1:55862657-55863645:55863798-55864956:-:alternative1";
1	hq_isoforms.fasta.no5merge.collapsed.gff	exon	55863645	55863798	.	-	.	gene_id "SE:1:55862657-55863645:55863798-55864956:-"; transcript_id "SE:1:55862657-55863645:55863798-55864956:-:alternative1";
1	hq_isoforms.fasta.no5merge.collapsed.gff	exon	55864956	55865056	.	-	.	gene_id "SE:1:55862657-55863645:55863798-55864956:-"; transcript_id "SE:1:55862657-55863645:55863798-55864956:-:alternative1";
1	hq_isoforms.fasta.no5merge.collapsed.gff	exon	55902872	55902972	.	-	.	gene_id "SE:1:55902972-55907341:55907435-55910896:-"; transcript_id "SE:1:55902972-55907341:55907435-55910896:-:alternative2";
1	hq_isoforms.fasta.no5merge.collapsed.gff	exon	55910896	55910996	.	-	.	gene_id "SE:1:55902972-55907341:55907435-55910896:-"; transcript_id "SE:1:55902972-55907341:55907435-55910896:-:alternative2";
1	hq_isoforms.fasta.no5merge.collapsed.gff	exon	55902872	55902972	.	-	.	gene_id "SE:1:55902972-55907341:55907435-55910896:-"; transcript_id "SE:1:55902972-55907341:55907435-55910896:-:alternative1";
1	hq_isoforms.fasta.no5merge.collapsed.gff	exon	55907341	55907435	.	-	.	gene_id "SE:1:55902972-55907341:55907435-55910896:-"; transcript_id "SE:1:55902972-55907341:55907435-55910896:-:alternative1";
1	hq_isoforms.fasta.no5merge.collapsed.gff	exon	55910896	55910996	.	-	.	gene_id "SE:1:55902972-55907341:55907435-55910896:-"; transcript_id "SE:1:55902972-55907341:55907435-55910896:-:alternative1";
1	hq_isoforms.fasta.no5merge.collapsed.gff	exon	56095051	56095151	.	-	.	gene_id "SE:1:56095151-56102291:56102399-56103090:-"; transcript_id "SE:1:56095151-56102291:56102399-56103090:-:alternative2";
1	hq_isoforms.fasta.no5merge.collapsed.gff	exon	56103090	56103190	.	-	.	gene_id "SE:1:56095151-56102291:56102399-56103090:-"; transcript_id "SE:1:56095151-56102291:56102399-56103090:-:alternative2";
1	hq_isoforms.fasta.no5merge.collapsed.gff	exon	56095051	56095151	.	-	.	gene_id "SE:1:56095151-56102291:56102399-56103090:-"; transcript_id "SE:1:56095151-56102291:56102399-56103090:-:alternative1";
1	hq_isoforms.fasta.no5merge.collapsed.gff	exon	56102291	56102399	.	-	.	gene_id "SE:1:56095151-56102291:56102399-56103090:-"; transcript_id "SE:1:56095151-56102291:56102399-56103090:-:alternative1";
1	hq_isoforms.fasta.no5merge.collapsed.gff	exon	56103090	56103190	.	-	.	gene_id "SE:1:56095151-56102291:56102399-56103090:-"; transcript_id "SE:1:56095151-56102291:56102399-56103090:-:alternative1";
1	hq_isoforms.fasta.no5merge.collapsed.gff	exon	56138809	56138909	.	-	.	gene_id "SE:1:56138909-56140749:56140879-56142222:-"; transcript_id "SE:1:56138909-56140749:56140879-56142222:-:alternative2";
1	hq_isoforms.fasta.no5merge.collapsed.gff	exon	56142222	56142322	.	-	.	gene_id "SE:1:56138909-56140749:56140879-56142222:-"; transcript_id "SE:1:56138909-56140749:56140879-56142222:-:alternative2";
1	hq_isoforms.fasta.no5merge.collapsed.gff	exon	56138809	56138909	.	-	.	gene_id "SE:1:56138909-56140749:56140879-56142222:-"; transcript_id "SE:1:56138909-56140749:56140879-56142222:-:alternative1";
1	hq_isoforms.fasta.no5merge.collapsed.gff	exon	56140749	56140879	.	-	.	gene_id "SE:1:56138909-56140749:56140879-56142222:-"; transcript_id "SE:1:56138909-56140749:56140879-56142222:-:alternative1";
1	hq_isoforms.fasta.no5merge.collapsed.gff	exon	56142222	56142322	.	-	.	gene_id "SE:1:56138909-56140749:56140879-56142222:-"; transcript_id "SE:1:56138909-56140749:56140879-56142222:-:alternative1";
1	hq_isoforms.fasta.no5merge.collapsed.gff	exon	56138809	56138909	.	-	.	gene_id "SE:1:56138909-56140025:56140064-56140749:-"; transcript_id "SE:1:56138909-56140025:56140064-56140749:-:alternative2";
1	hq_isoforms.fasta.no5merge.collapsed.gff	exon	56140749	56140849	.	-	.	gene_id "SE:1:56138909-56140025:56140064-56140749:-"; transcript_id "SE:1:56138909-56140025:56140064-56140749:-:alternative2";
1	hq_isoforms.fasta.no5merge.collapsed.gff	exon	56138809	56138909	.	-	.	gene_id "SE:1:56138909-56140025:56140064-56140749:-"; transcript_id "SE:1:56138909-56140025:56140064-56140749:-:alternative1";
1	hq_isoforms.fasta.no5merge.collapsed.gff	exon	56140025	56140064	.	-	.	gene_id "SE:1:56138909-56140025:56140064-56140749:-"; transcript_id "SE:1:56138909-56140025:56140064-56140749:-:alternative1";
1	hq_isoforms.fasta.no5merge.collapsed.gff	exon	56140749	56140849	.	-	.	gene_id "SE:1:56138909-56140025:56140064-56140749:-"; transcript_id "SE:1:56138909-56140025:56140064-56140749:-:alternative1";
1	hq_isoforms.fasta.no5merge.collapsed.gff	exon	56138809	56138909	.	-	.	gene_id "SE:1:56138909-56140749:56140805-56142222:-"; transcript_id "SE:1:56138909-56140749:56140805-56142222:-:alternative2";
1	hq_isoforms.fasta.no5merge.collapsed.gff	exon	56142222	56142322	.	-	.	gene_id "SE:1:56138909-56140749:56140805-56142222:-"; transcript_id "SE:1:56138909-56140749:56140805-56142222:-:alternative2";
1	hq_isoforms.fasta.no5merge.collapsed.gff	exon	56138809	56138909	.	-	.	gene_id "SE:1:56138909-56140749:56140805-56142222:-"; transcript_id "SE:1:56138909-56140749:56140805-56142222:-:alternative1";
1	hq_isoforms.fasta.no5merge.collapsed.gff	exon	56140749	56140805	.	-	.	gene_id "SE:1:56138909-56140749:56140805-56142222:-"; transcript_id "SE:1:56138909-56140749:56140805-56142222:-:alternative1";
1	hq_isoforms.fasta.no5merge.collapsed.gff	exon	56142222	56142322	.	-	.	gene_id "SE:1:56138909-56140749:56140805-56142222:-"; transcript_id "SE:1:56138909-56140749:56140805-56142222:-:alternative1";
1	hq_isoforms.fasta.no5merge.collapsed.gff	exon	56505759	56505859	.	-	.	gene_id "SE:1:56505859-56506836:56507032-56507497:-"; transcript_id "SE:1:56505859-56506836:56507032-56507497:-:alternative2";
1	hq_isoforms.fasta.no5merge.collapsed.gff	exon	56507497	56507597	.	-	.	gene_id "SE:1:56505859-56506836:56507032-56507497:-"; transcript_id "SE:1:56505859-56506836:56507032-56507497:-:alternative2";
1	hq_isoforms.fasta.no5merge.collapsed.gff	exon	56505759	56505859	.	-	.	gene_id "SE:1:56505859-56506836:56507032-56507497:-"; transcript_id "SE:1:56505859-56506836:56507032-56507497:-:alternative1";
1	hq_isoforms.fasta.no5merge.collapsed.gff	exon	56506836	56507032	.	-	.	gene_id "SE:1:56505859-56506836:56507032-56507497:-"; transcript_id "SE:1:56505859-56506836:56507032-56507497:-:alternative1";
1	hq_isoforms.fasta.no5merge.collapsed.gff	exon	56507497	56507597	.	-	.	gene_id "SE:1:56505859-56506836:56507032-56507497:-"; transcript_id "SE:1:56505859-56506836:56507032-56507497:-:alternative1";
1	hq_isoforms.fasta.no5merge.collapsed.gff	exon	56893635	56893735	.	-	.	gene_id "SE:1:56893735-56895935:56896044-56907848:-"; transcript_id "SE:1:56893735-56895935:56896044-56907848:-:alternative2";
1	hq_isoforms.fasta.no5merge.collapsed.gff	exon	56907848	56907948	.	-	.	gene_id "SE:1:56893735-56895935:56896044-56907848:-"; transcript_id "SE:1:56893735-56895935:56896044-56907848:-:alternative2";
1	hq_isoforms.fasta.no5merge.collapsed.gff	exon	56893635	56893735	.	-	.	gene_id "SE:1:56893735-56895935:56896044-56907848:-"; transcript_id "SE:1:56893735-56895935:56896044-56907848:-:alternative1";
1	hq_isoforms.fasta.no5merge.collapsed.gff	exon	56895935	56896044	.	-	.	gene_id "SE:1:56893735-56895935:56896044-56907848:-"; transcript_id "SE:1:56893735-56895935:56896044-56907848:-:alternative1";
1	hq_isoforms.fasta.no5merge.collapsed.gff	exon	56907848	56907948	.	-	.	gene_id "SE:1:56893735-56895935:56896044-56907848:-"; transcript_id "SE:1:56893735-56895935:56896044-56907848:-:alternative1";
1	hq_isoforms.fasta.no5merge.collapsed.gff	exon	57916576	57916676	.	-	.	gene_id "SE:1:57916676-57916735:57916742-57916827:-"; transcript_id "SE:1:57916676-57916735:57916742-57916827:-:alternative2";
1	hq_isoforms.fasta.no5merge.collapsed.gff	exon	57916827	57916927	.	-	.	gene_id "SE:1:57916676-57916735:57916742-57916827:-"; transcript_id "SE:1:57916676-57916735:57916742-57916827:-:alternative2";
1	hq_isoforms.fasta.no5merge.collapsed.gff	exon	57916576	57916676	.	-	.	gene_id "SE:1:57916676-57916735:57916742-57916827:-"; transcript_id "SE:1:57916676-57916735:57916742-57916827:-:alternative1";
1	hq_isoforms.fasta.no5merge.collapsed.gff	exon	57916735	57916742	.	-	.	gene_id "SE:1:57916676-57916735:57916742-57916827:-"; transcript_id "SE:1:57916676-57916735:57916742-57916827:-:alternative1";
1	hq_isoforms.fasta.no5merge.collapsed.gff	exon	57916827	57916927	.	-	.	gene_id "SE:1:57916676-57916735:57916742-57916827:-"; transcript_id "SE:1:57916676-57916735:57916742-57916827:-:alternative1";
1	hq_isoforms.fasta.no5merge.collapsed.gff	exon	59046832	59046932	.	-	.	gene_id "SE:1:59046932-59047129:59047237-59047685:-"; transcript_id "SE:1:59046932-59047129:59047237-59047685:-:alternative2";
1	hq_isoforms.fasta.no5merge.collapsed.gff	exon	59047685	59047785	.	-	.	gene_id "SE:1:59046932-59047129:59047237-59047685:-"; transcript_id "SE:1:59046932-59047129:59047237-59047685:-:alternative2";
1	hq_isoforms.fasta.no5merge.collapsed.gff	exon	59046832	59046932	.	-	.	gene_id "SE:1:59046932-59047129:59047237-59047685:-"; transcript_id "SE:1:59046932-59047129:59047237-59047685:-:alternative1";
1	hq_isoforms.fasta.no5merge.collapsed.gff	exon	59047129	59047237	.	-	.	gene_id "SE:1:59046932-59047129:59047237-59047685:-"; transcript_id "SE:1:59046932-59047129:59047237-59047685:-:alternative1";
1	hq_isoforms.fasta.no5merge.collapsed.gff	exon	59047685	59047785	.	-	.	gene_id "SE:1:59046932-59047129:59047237-59047685:-"; transcript_id "SE:1:59046932-59047129:59047237-59047685:-:alternative1";
1	hq_isoforms.fasta.no5merge.collapsed.gff	exon	59138104	59138204	.	-	.	gene_id "SE:1:59138204-59144203:59144444-59148667:-"; transcript_id "SE:1:59138204-59144203:59144444-59148667:-:alternative2";
1	hq_isoforms.fasta.no5merge.collapsed.gff	exon	59148667	59148767	.	-	.	gene_id "SE:1:59138204-59144203:59144444-59148667:-"; transcript_id "SE:1:59138204-59144203:59144444-59148667:-:alternative2";
1	hq_isoforms.fasta.no5merge.collapsed.gff	exon	59138104	59138204	.	-	.	gene_id "SE:1:59138204-59144203:59144444-59148667:-"; transcript_id "SE:1:59138204-59144203:59144444-59148667:-:alternative1";
1	hq_isoforms.fasta.no5merge.collapsed.gff	exon	59144203	59144444	.	-	.	gene_id "SE:1:59138204-59144203:59144444-59148667:-"; transcript_id "SE:1:59138204-59144203:59144444-59148667:-:alternative1";
1	hq_isoforms.fasta.no5merge.collapsed.gff	exon	59148667	59148767	.	-	.	gene_id "SE:1:59138204-59144203:59144444-59148667:-"; transcript_id "SE:1:59138204-59144203:59144444-59148667:-:alternative1";
1	hq_isoforms.fasta.no5merge.collapsed.gff	exon	59190650	59190750	.	-	.	gene_id "SE:1:59190750-59196902:59197050-59200457:-"; transcript_id "SE:1:59190750-59196902:59197050-59200457:-:alternative2";
1	hq_isoforms.fasta.no5merge.collapsed.gff	exon	59200457	59200557	.	-	.	gene_id "SE:1:59190750-59196902:59197050-59200457:-"; transcript_id "SE:1:59190750-59196902:59197050-59200457:-:alternative2";
1	hq_isoforms.fasta.no5merge.collapsed.gff	exon	59190650	59190750	.	-	.	gene_id "SE:1:59190750-59196902:59197050-59200457:-"; transcript_id "SE:1:59190750-59196902:59197050-59200457:-:alternative1";
1	hq_isoforms.fasta.no5merge.collapsed.gff	exon	59196902	59197050	.	-	.	gene_id "SE:1:59190750-59196902:59197050-59200457:-"; transcript_id "SE:1:59190750-59196902:59197050-59200457:-:alternative1";
1	hq_isoforms.fasta.no5merge.collapsed.gff	exon	59200457	59200557	.	-	.	gene_id "SE:1:59190750-59196902:59197050-59200457:-"; transcript_id "SE:1:59190750-59196902:59197050-59200457:-:alternative1";
1	hq_isoforms.fasta.no5merge.collapsed.gff	exon	59205894	59205994	.	-	.	gene_id "SE:1:59205994-59207272:59207365-59208962:-"; transcript_id "SE:1:59205994-59207272:59207365-59208962:-:alternative2";
1	hq_isoforms.fasta.no5merge.collapsed.gff	exon	59208962	59209062	.	-	.	gene_id "SE:1:59205994-59207272:59207365-59208962:-"; transcript_id "SE:1:59205994-59207272:59207365-59208962:-:alternative2";
1	hq_isoforms.fasta.no5merge.collapsed.gff	exon	59205894	59205994	.	-	.	gene_id "SE:1:59205994-59207272:59207365-59208962:-"; transcript_id "SE:1:59205994-59207272:59207365-59208962:-:alternative1";
1	hq_isoforms.fasta.no5merge.collapsed.gff	exon	59207272	59207365	.	-	.	gene_id "SE:1:59205994-59207272:59207365-59208962:-"; transcript_id "SE:1:59205994-59207272:59207365-59208962:-:alternative1";
1	hq_isoforms.fasta.no5merge.collapsed.gff	exon	59208962	59209062	.	-	.	gene_id "SE:1:59205994-59207272:59207365-59208962:-"; transcript_id "SE:1:59205994-59207272:59207365-59208962:-:alternative1";
1	hq_isoforms.fasta.no5merge.collapsed.gff	exon	59287055	59287155	.	-	.	gene_id "SE:1:59287155-59289853:59289972-59291383:-"; transcript_id "SE:1:59287155-59289853:59289972-59291383:-:alternative2";
1	hq_isoforms.fasta.no5merge.collapsed.gff	exon	59291383	59291483	.	-	.	gene_id "SE:1:59287155-59289853:59289972-59291383:-"; transcript_id "SE:1:59287155-59289853:59289972-59291383:-:alternative2";
1	hq_isoforms.fasta.no5merge.collapsed.gff	exon	59287055	59287155	.	-	.	gene_id "SE:1:59287155-59289853:59289972-59291383:-"; transcript_id "SE:1:59287155-59289853:59289972-59291383:-:alternative1";
1	hq_isoforms.fasta.no5merge.collapsed.gff	exon	59289853	59289972	.	-	.	gene_id "SE:1:59287155-59289853:59289972-59291383:-"; transcript_id "SE:1:59287155-59289853:59289972-59291383:-:alternative1";
1	hq_isoforms.fasta.no5merge.collapsed.gff	exon	59291383	59291483	.	-	.	gene_id "SE:1:59287155-59289853:59289972-59291383:-"; transcript_id "SE:1:59287155-59289853:59289972-59291383:-:alternative1";
1	hq_isoforms.fasta.no5merge.collapsed.gff	exon	59360184	59360284	.	-	.	gene_id "SE:1:59360284-59361536:59361591-59362316:-"; transcript_id "SE:1:59360284-59361536:59361591-59362316:-:alternative2";
1	hq_isoforms.fasta.no5merge.collapsed.gff	exon	59362316	59362416	.	-	.	gene_id "SE:1:59360284-59361536:59361591-59362316:-"; transcript_id "SE:1:59360284-59361536:59361591-59362316:-:alternative2";
1	hq_isoforms.fasta.no5merge.collapsed.gff	exon	59360184	59360284	.	-	.	gene_id "SE:1:59360284-59361536:59361591-59362316:-"; transcript_id "SE:1:59360284-59361536:59361591-59362316:-:alternative1";
1	hq_isoforms.fasta.no5merge.collapsed.gff	exon	59361536	59361591	.	-	.	gene_id "SE:1:59360284-59361536:59361591-59362316:-"; transcript_id "SE:1:59360284-59361536:59361591-59362316:-:alternative1";
1	hq_isoforms.fasta.no5merge.collapsed.gff	exon	59362316	59362416	.	-	.	gene_id "SE:1:59360284-59361536:59361591-59362316:-"; transcript_id "SE:1:59360284-59361536:59361591-59362316:-:alternative1";
1	hq_isoforms.fasta.no5merge.collapsed.gff	exon	59641522	59641622	.	-	.	gene_id "SE:1:59641622-59641699:59641707-59641805:-"; transcript_id "SE:1:59641622-59641699:59641707-59641805:-:alternative2";
1	hq_isoforms.fasta.no5merge.collapsed.gff	exon	59641805	59641905	.	-	.	gene_id "SE:1:59641622-59641699:59641707-59641805:-"; transcript_id "SE:1:59641622-59641699:59641707-59641805:-:alternative2";
1	hq_isoforms.fasta.no5merge.collapsed.gff	exon	59641522	59641622	.	-	.	gene_id "SE:1:59641622-59641699:59641707-59641805:-"; transcript_id "SE:1:59641622-59641699:59641707-59641805:-:alternative1";
1	hq_isoforms.fasta.no5merge.collapsed.gff	exon	59641699	59641707	.	-	.	gene_id "SE:1:59641622-59641699:59641707-59641805:-"; transcript_id "SE:1:59641622-59641699:59641707-59641805:-:alternative1";
1	hq_isoforms.fasta.no5merge.collapsed.gff	exon	59641805	59641905	.	-	.	gene_id "SE:1:59641622-59641699:59641707-59641805:-"; transcript_id "SE:1:59641622-59641699:59641707-59641805:-:alternative1";
1	hq_isoforms.fasta.no5merge.collapsed.gff	exon	60135013	60135113	.	-	.	gene_id "SE:1:60135113-60137695:60137765-60235717:-"; transcript_id "SE:1:60135113-60137695:60137765-60235717:-:alternative2";
1	hq_isoforms.fasta.no5merge.collapsed.gff	exon	60235717	60235817	.	-	.	gene_id "SE:1:60135113-60137695:60137765-60235717:-"; transcript_id "SE:1:60135113-60137695:60137765-60235717:-:alternative2";
1	hq_isoforms.fasta.no5merge.collapsed.gff	exon	60135013	60135113	.	-	.	gene_id "SE:1:60135113-60137695:60137765-60235717:-"; transcript_id "SE:1:60135113-60137695:60137765-60235717:-:alternative1";
1	hq_isoforms.fasta.no5merge.collapsed.gff	exon	60137695	60137765	.	-	.	gene_id "SE:1:60135113-60137695:60137765-60235717:-"; transcript_id "SE:1:60135113-60137695:60137765-60235717:-:alternative1";
1	hq_isoforms.fasta.no5merge.collapsed.gff	exon	60235717	60235817	.	-	.	gene_id "SE:1:60135113-60137695:60137765-60235717:-"; transcript_id "SE:1:60135113-60137695:60137765-60235717:-:alternative1";
1	hq_isoforms.fasta.no5merge.collapsed.gff	exon	60137665	60137765	.	-	.	gene_id "SE:1:60137765-60138441:60138662-60235717:-"; transcript_id "SE:1:60137765-60138441:60138662-60235717:-:alternative2";
1	hq_isoforms.fasta.no5merge.collapsed.gff	exon	60235717	60235817	.	-	.	gene_id "SE:1:60137765-60138441:60138662-60235717:-"; transcript_id "SE:1:60137765-60138441:60138662-60235717:-:alternative2";
1	hq_isoforms.fasta.no5merge.collapsed.gff	exon	60137665	60137765	.	-	.	gene_id "SE:1:60137765-60138441:60138662-60235717:-"; transcript_id "SE:1:60137765-60138441:60138662-60235717:-:alternative1";
1	hq_isoforms.fasta.no5merge.collapsed.gff	exon	60138441	60138662	.	-	.	gene_id "SE:1:60137765-60138441:60138662-60235717:-"; transcript_id "SE:1:60137765-60138441:60138662-60235717:-:alternative1";
1	hq_isoforms.fasta.no5merge.collapsed.gff	exon	60235717	60235817	.	-	.	gene_id "SE:1:60137765-60138441:60138662-60235717:-"; transcript_id "SE:1:60137765-60138441:60138662-60235717:-:alternative1";
1	hq_isoforms.fasta.no5merge.collapsed.gff	exon	61325004	61325104	.	-	.	gene_id "SE:1:61325104-61326459:61326579-61326759:-"; transcript_id "SE:1:61325104-61326459:61326579-61326759:-:alternative2";
1	hq_isoforms.fasta.no5merge.collapsed.gff	exon	61326759	61326859	.	-	.	gene_id "SE:1:61325104-61326459:61326579-61326759:-"; transcript_id "SE:1:61325104-61326459:61326579-61326759:-:alternative2";
1	hq_isoforms.fasta.no5merge.collapsed.gff	exon	61325004	61325104	.	-	.	gene_id "SE:1:61325104-61326459:61326579-61326759:-"; transcript_id "SE:1:61325104-61326459:61326579-61326759:-:alternative1";
1	hq_isoforms.fasta.no5merge.collapsed.gff	exon	61326459	61326579	.	-	.	gene_id "SE:1:61325104-61326459:61326579-61326759:-"; transcript_id "SE:1:61325104-61326459:61326579-61326759:-:alternative1";
1	hq_isoforms.fasta.no5merge.collapsed.gff	exon	61326759	61326859	.	-	.	gene_id "SE:1:61325104-61326459:61326579-61326759:-"; transcript_id "SE:1:61325104-61326459:61326579-61326759:-:alternative1";
1	hq_isoforms.fasta.no5merge.collapsed.gff	exon	61318378	61318478	.	-	.	gene_id "SE:1:61318478-61320856:61320933-61322062:-"; transcript_id "SE:1:61318478-61320856:61320933-61322062:-:alternative2";
1	hq_isoforms.fasta.no5merge.collapsed.gff	exon	61322062	61322162	.	-	.	gene_id "SE:1:61318478-61320856:61320933-61322062:-"; transcript_id "SE:1:61318478-61320856:61320933-61322062:-:alternative2";
1	hq_isoforms.fasta.no5merge.collapsed.gff	exon	61318378	61318478	.	-	.	gene_id "SE:1:61318478-61320856:61320933-61322062:-"; transcript_id "SE:1:61318478-61320856:61320933-61322062:-:alternative1";
1	hq_isoforms.fasta.no5merge.collapsed.gff	exon	61320856	61320933	.	-	.	gene_id "SE:1:61318478-61320856:61320933-61322062:-"; transcript_id "SE:1:61318478-61320856:61320933-61322062:-:alternative1";
1	hq_isoforms.fasta.no5merge.collapsed.gff	exon	61322062	61322162	.	-	.	gene_id "SE:1:61318478-61320856:61320933-61322062:-"; transcript_id "SE:1:61318478-61320856:61320933-61322062:-:alternative1";
1	hq_isoforms.fasta.no5merge.collapsed.gff	exon	61332779	61332879	.	-	.	gene_id "SE:1:61332879-61334048:61334086-61339376:-"; transcript_id "SE:1:61332879-61334048:61334086-61339376:-:alternative2";
1	hq_isoforms.fasta.no5merge.collapsed.gff	exon	61339376	61339476	.	-	.	gene_id "SE:1:61332879-61334048:61334086-61339376:-"; transcript_id "SE:1:61332879-61334048:61334086-61339376:-:alternative2";
1	hq_isoforms.fasta.no5merge.collapsed.gff	exon	61332779	61332879	.	-	.	gene_id "SE:1:61332879-61334048:61334086-61339376:-"; transcript_id "SE:1:61332879-61334048:61334086-61339376:-:alternative1";
1	hq_isoforms.fasta.no5merge.collapsed.gff	exon	61334048	61334086	.	-	.	gene_id "SE:1:61332879-61334048:61334086-61339376:-"; transcript_id "SE:1:61332879-61334048:61334086-61339376:-:alternative1";
1	hq_isoforms.fasta.no5merge.collapsed.gff	exon	61339376	61339476	.	-	.	gene_id "SE:1:61332879-61334048:61334086-61339376:-"; transcript_id "SE:1:61332879-61334048:61334086-61339376:-:alternative1";
1	hq_isoforms.fasta.no5merge.collapsed.gff	exon	61318378	61318478	.	-	.	gene_id "SE:1:61318478-61319139:61319311-61320856:-"; transcript_id "SE:1:61318478-61319139:61319311-61320856:-:alternative2";
1	hq_isoforms.fasta.no5merge.collapsed.gff	exon	61320856	61320956	.	-	.	gene_id "SE:1:61318478-61319139:61319311-61320856:-"; transcript_id "SE:1:61318478-61319139:61319311-61320856:-:alternative2";
1	hq_isoforms.fasta.no5merge.collapsed.gff	exon	61318378	61318478	.	-	.	gene_id "SE:1:61318478-61319139:61319311-61320856:-"; transcript_id "SE:1:61318478-61319139:61319311-61320856:-:alternative1";
1	hq_isoforms.fasta.no5merge.collapsed.gff	exon	61319139	61319311	.	-	.	gene_id "SE:1:61318478-61319139:61319311-61320856:-"; transcript_id "SE:1:61318478-61319139:61319311-61320856:-:alternative1";
1	hq_isoforms.fasta.no5merge.collapsed.gff	exon	61320856	61320956	.	-	.	gene_id "SE:1:61318478-61319139:61319311-61320856:-"; transcript_id "SE:1:61318478-61319139:61319311-61320856:-:alternative1";
1	hq_isoforms.fasta.no5merge.collapsed.gff	exon	61472092	61472192	.	-	.	gene_id "SE:1:61472192-61475056:61475168-61475522:-"; transcript_id "SE:1:61472192-61475056:61475168-61475522:-:alternative2";
1	hq_isoforms.fasta.no5merge.collapsed.gff	exon	61475522	61475622	.	-	.	gene_id "SE:1:61472192-61475056:61475168-61475522:-"; transcript_id "SE:1:61472192-61475056:61475168-61475522:-:alternative2";
1	hq_isoforms.fasta.no5merge.collapsed.gff	exon	61472092	61472192	.	-	.	gene_id "SE:1:61472192-61475056:61475168-61475522:-"; transcript_id "SE:1:61472192-61475056:61475168-61475522:-:alternative1";
1	hq_isoforms.fasta.no5merge.collapsed.gff	exon	61475056	61475168	.	-	.	gene_id "SE:1:61472192-61475056:61475168-61475522:-"; transcript_id "SE:1:61472192-61475056:61475168-61475522:-:alternative1";
1	hq_isoforms.fasta.no5merge.collapsed.gff	exon	61475522	61475622	.	-	.	gene_id "SE:1:61472192-61475056:61475168-61475522:-"; transcript_id "SE:1:61472192-61475056:61475168-61475522:-:alternative1";
1	hq_isoforms.fasta.no5merge.collapsed.gff	exon	61536030	61536130	.	-	.	gene_id "SE:1:61536130-61542271:61542346-61557215:-"; transcript_id "SE:1:61536130-61542271:61542346-61557215:-:alternative2";
1	hq_isoforms.fasta.no5merge.collapsed.gff	exon	61557215	61557315	.	-	.	gene_id "SE:1:61536130-61542271:61542346-61557215:-"; transcript_id "SE:1:61536130-61542271:61542346-61557215:-:alternative2";
1	hq_isoforms.fasta.no5merge.collapsed.gff	exon	61536030	61536130	.	-	.	gene_id "SE:1:61536130-61542271:61542346-61557215:-"; transcript_id "SE:1:61536130-61542271:61542346-61557215:-:alternative1";
1	hq_isoforms.fasta.no5merge.collapsed.gff	exon	61542271	61542346	.	-	.	gene_id "SE:1:61536130-61542271:61542346-61557215:-"; transcript_id "SE:1:61536130-61542271:61542346-61557215:-:alternative1";
1	hq_isoforms.fasta.no5merge.collapsed.gff	exon	61557215	61557315	.	-	.	gene_id "SE:1:61536130-61542271:61542346-61557215:-"; transcript_id "SE:1:61536130-61542271:61542346-61557215:-:alternative1";
1	hq_isoforms.fasta.no5merge.collapsed.gff	exon	62995414	62995514	.	-	.	gene_id "SE:1:62995514-62996367:62996551-62998480:-"; transcript_id "SE:1:62995514-62996367:62996551-62998480:-:alternative2";
1	hq_isoforms.fasta.no5merge.collapsed.gff	exon	62998480	62998580	.	-	.	gene_id "SE:1:62995514-62996367:62996551-62998480:-"; transcript_id "SE:1:62995514-62996367:62996551-62998480:-:alternative2";
1	hq_isoforms.fasta.no5merge.collapsed.gff	exon	62995414	62995514	.	-	.	gene_id "SE:1:62995514-62996367:62996551-62998480:-"; transcript_id "SE:1:62995514-62996367:62996551-62998480:-:alternative1";
1	hq_isoforms.fasta.no5merge.collapsed.gff	exon	62996367	62996551	.	-	.	gene_id "SE:1:62995514-62996367:62996551-62998480:-"; transcript_id "SE:1:62995514-62996367:62996551-62998480:-:alternative1";
1	hq_isoforms.fasta.no5merge.collapsed.gff	exon	62998480	62998580	.	-	.	gene_id "SE:1:62995514-62996367:62996551-62998480:-"; transcript_id "SE:1:62995514-62996367:62996551-62998480:-:alternative1";
1	hq_isoforms.fasta.no5merge.collapsed.gff	exon	63867366	63867466	.	-	.	gene_id "SE:1:63867466-63878750:63878754-63898516:-"; transcript_id "SE:1:63867466-63878750:63878754-63898516:-:alternative2";
1	hq_isoforms.fasta.no5merge.collapsed.gff	exon	63898516	63898616	.	-	.	gene_id "SE:1:63867466-63878750:63878754-63898516:-"; transcript_id "SE:1:63867466-63878750:63878754-63898516:-:alternative2";
1	hq_isoforms.fasta.no5merge.collapsed.gff	exon	63867366	63867466	.	-	.	gene_id "SE:1:63867466-63878750:63878754-63898516:-"; transcript_id "SE:1:63867466-63878750:63878754-63898516:-:alternative1";
1	hq_isoforms.fasta.no5merge.collapsed.gff	exon	63878750	63878754	.	-	.	gene_id "SE:1:63867466-63878750:63878754-63898516:-"; transcript_id "SE:1:63867466-63878750:63878754-63898516:-:alternative1";
1	hq_isoforms.fasta.no5merge.collapsed.gff	exon	63898516	63898616	.	-	.	gene_id "SE:1:63867466-63878750:63878754-63898516:-"; transcript_id "SE:1:63867466-63878750:63878754-63898516:-:alternative1";
1	hq_isoforms.fasta.no5merge.collapsed.gff	exon	63620705	63620805	.	-	.	gene_id "SE:1:63620805-63623129:63623169-63623776:-"; transcript_id "SE:1:63620805-63623129:63623169-63623776:-:alternative2";
1	hq_isoforms.fasta.no5merge.collapsed.gff	exon	63623776	63623876	.	-	.	gene_id "SE:1:63620805-63623129:63623169-63623776:-"; transcript_id "SE:1:63620805-63623129:63623169-63623776:-:alternative2";
1	hq_isoforms.fasta.no5merge.collapsed.gff	exon	63620705	63620805	.	-	.	gene_id "SE:1:63620805-63623129:63623169-63623776:-"; transcript_id "SE:1:63620805-63623129:63623169-63623776:-:alternative1";
1	hq_isoforms.fasta.no5merge.collapsed.gff	exon	63623129	63623169	.	-	.	gene_id "SE:1:63620805-63623129:63623169-63623776:-"; transcript_id "SE:1:63620805-63623129:63623169-63623776:-:alternative1";
1	hq_isoforms.fasta.no5merge.collapsed.gff	exon	63623776	63623876	.	-	.	gene_id "SE:1:63620805-63623129:63623169-63623776:-"; transcript_id "SE:1:63620805-63623129:63623169-63623776:-:alternative1";
1	hq_isoforms.fasta.no5merge.collapsed.gff	exon	63598762	63598862	.	-	.	gene_id "SE:1:63598862-63601124:63601190-63620678:-"; transcript_id "SE:1:63598862-63601124:63601190-63620678:-:alternative2";
1	hq_isoforms.fasta.no5merge.collapsed.gff	exon	63620678	63620778	.	-	.	gene_id "SE:1:63598862-63601124:63601190-63620678:-"; transcript_id "SE:1:63598862-63601124:63601190-63620678:-:alternative2";
1	hq_isoforms.fasta.no5merge.collapsed.gff	exon	63598762	63598862	.	-	.	gene_id "SE:1:63598862-63601124:63601190-63620678:-"; transcript_id "SE:1:63598862-63601124:63601190-63620678:-:alternative1";
1	hq_isoforms.fasta.no5merge.collapsed.gff	exon	63601124	63601190	.	-	.	gene_id "SE:1:63598862-63601124:63601190-63620678:-"; transcript_id "SE:1:63598862-63601124:63601190-63620678:-:alternative1";
1	hq_isoforms.fasta.no5merge.collapsed.gff	exon	63620678	63620778	.	-	.	gene_id "SE:1:63598862-63601124:63601190-63620678:-"; transcript_id "SE:1:63598862-63601124:63601190-63620678:-:alternative1";
1	hq_isoforms.fasta.no5merge.collapsed.gff	exon	63620705	63620805	.	-	.	gene_id "SE:1:63620805-63623125:63623169-63623776:-"; transcript_id "SE:1:63620805-63623125:63623169-63623776:-:alternative2";
1	hq_isoforms.fasta.no5merge.collapsed.gff	exon	63623776	63623876	.	-	.	gene_id "SE:1:63620805-63623125:63623169-63623776:-"; transcript_id "SE:1:63620805-63623125:63623169-63623776:-:alternative2";
1	hq_isoforms.fasta.no5merge.collapsed.gff	exon	63620705	63620805	.	-	.	gene_id "SE:1:63620805-63623125:63623169-63623776:-"; transcript_id "SE:1:63620805-63623125:63623169-63623776:-:alternative1";
1	hq_isoforms.fasta.no5merge.collapsed.gff	exon	63623125	63623169	.	-	.	gene_id "SE:1:63620805-63623125:63623169-63623776:-"; transcript_id "SE:1:63620805-63623125:63623169-63623776:-:alternative1";
1	hq_isoforms.fasta.no5merge.collapsed.gff	exon	63623776	63623876	.	-	.	gene_id "SE:1:63620805-63623125:63623169-63623776:-"; transcript_id "SE:1:63620805-63623125:63623169-63623776:-:alternative1";
1	hq_isoforms.fasta.no5merge.collapsed.gff	exon	63942253	63942353	.	-	.	gene_id "SE:1:63942353-63966055:63966145-63974684:-"; transcript_id "SE:1:63942353-63966055:63966145-63974684:-:alternative2";
1	hq_isoforms.fasta.no5merge.collapsed.gff	exon	63974684	63974784	.	-	.	gene_id "SE:1:63942353-63966055:63966145-63974684:-"; transcript_id "SE:1:63942353-63966055:63966145-63974684:-:alternative2";
1	hq_isoforms.fasta.no5merge.collapsed.gff	exon	63942253	63942353	.	-	.	gene_id "SE:1:63942353-63966055:63966145-63974684:-"; transcript_id "SE:1:63942353-63966055:63966145-63974684:-:alternative1";
1	hq_isoforms.fasta.no5merge.collapsed.gff	exon	63966055	63966145	.	-	.	gene_id "SE:1:63942353-63966055:63966145-63974684:-"; transcript_id "SE:1:63942353-63966055:63966145-63974684:-:alternative1";
1	hq_isoforms.fasta.no5merge.collapsed.gff	exon	63974684	63974784	.	-	.	gene_id "SE:1:63942353-63966055:63966145-63974684:-"; transcript_id "SE:1:63942353-63966055:63966145-63974684:-:alternative1";
1	hq_isoforms.fasta.no5merge.collapsed.gff	exon	64340690	64340790	.	-	.	gene_id "SE:1:64340790-64353709:64353759-64358233:-"; transcript_id "SE:1:64340790-64353709:64353759-64358233:-:alternative2";
1	hq_isoforms.fasta.no5merge.collapsed.gff	exon	64358233	64358333	.	-	.	gene_id "SE:1:64340790-64353709:64353759-64358233:-"; transcript_id "SE:1:64340790-64353709:64353759-64358233:-:alternative2";
1	hq_isoforms.fasta.no5merge.collapsed.gff	exon	64340690	64340790	.	-	.	gene_id "SE:1:64340790-64353709:64353759-64358233:-"; transcript_id "SE:1:64340790-64353709:64353759-64358233:-:alternative1";
1	hq_isoforms.fasta.no5merge.collapsed.gff	exon	64353709	64353759	.	-	.	gene_id "SE:1:64340790-64353709:64353759-64358233:-"; transcript_id "SE:1:64340790-64353709:64353759-64358233:-:alternative1";
1	hq_isoforms.fasta.no5merge.collapsed.gff	exon	64358233	64358333	.	-	.	gene_id "SE:1:64340790-64353709:64353759-64358233:-"; transcript_id "SE:1:64340790-64353709:64353759-64358233:-:alternative1";
1	hq_isoforms.fasta.no5merge.collapsed.gff	exon	64359067	64359167	.	-	.	gene_id "SE:1:64359167-64361065:64361115-64364767:-"; transcript_id "SE:1:64359167-64361065:64361115-64364767:-:alternative2";
1	hq_isoforms.fasta.no5merge.collapsed.gff	exon	64364767	64364867	.	-	.	gene_id "SE:1:64359167-64361065:64361115-64364767:-"; transcript_id "SE:1:64359167-64361065:64361115-64364767:-:alternative2";
1	hq_isoforms.fasta.no5merge.collapsed.gff	exon	64359067	64359167	.	-	.	gene_id "SE:1:64359167-64361065:64361115-64364767:-"; transcript_id "SE:1:64359167-64361065:64361115-64364767:-:alternative1";
1	hq_isoforms.fasta.no5merge.collapsed.gff	exon	64361065	64361115	.	-	.	gene_id "SE:1:64359167-64361065:64361115-64364767:-"; transcript_id "SE:1:64359167-64361065:64361115-64364767:-:alternative1";
1	hq_isoforms.fasta.no5merge.collapsed.gff	exon	64364767	64364867	.	-	.	gene_id "SE:1:64359167-64361065:64361115-64364767:-"; transcript_id "SE:1:64359167-64361065:64361115-64364767:-:alternative1";
1	hq_isoforms.fasta.no5merge.collapsed.gff	exon	64340690	64340790	.	-	.	gene_id "SE:1:64340790-64353709:64357524-64358233:-"; transcript_id "SE:1:64340790-64353709:64357524-64358233:-:alternative2";
1	hq_isoforms.fasta.no5merge.collapsed.gff	exon	64358233	64358333	.	-	.	gene_id "SE:1:64340790-64353709:64357524-64358233:-"; transcript_id "SE:1:64340790-64353709:64357524-64358233:-:alternative2";
1	hq_isoforms.fasta.no5merge.collapsed.gff	exon	64340690	64340790	.	-	.	gene_id "SE:1:64340790-64353709:64357524-64358233:-"; transcript_id "SE:1:64340790-64353709:64357524-64358233:-:alternative1";
1	hq_isoforms.fasta.no5merge.collapsed.gff	exon	64353709	64357524	.	-	.	gene_id "SE:1:64340790-64353709:64357524-64358233:-"; transcript_id "SE:1:64340790-64353709:64357524-64358233:-:alternative1";
1	hq_isoforms.fasta.no5merge.collapsed.gff	exon	64358233	64358333	.	-	.	gene_id "SE:1:64340790-64353709:64357524-64358233:-"; transcript_id "SE:1:64340790-64353709:64357524-64358233:-:alternative1";
1	hq_isoforms.fasta.no5merge.collapsed.gff	exon	64408608	64408708	.	-	.	gene_id "SE:1:64408708-64423998:64424090-64425199:-"; transcript_id "SE:1:64408708-64423998:64424090-64425199:-:alternative2";
1	hq_isoforms.fasta.no5merge.collapsed.gff	exon	64425199	64425299	.	-	.	gene_id "SE:1:64408708-64423998:64424090-64425199:-"; transcript_id "SE:1:64408708-64423998:64424090-64425199:-:alternative2";
1	hq_isoforms.fasta.no5merge.collapsed.gff	exon	64408608	64408708	.	-	.	gene_id "SE:1:64408708-64423998:64424090-64425199:-"; transcript_id "SE:1:64408708-64423998:64424090-64425199:-:alternative1";
1	hq_isoforms.fasta.no5merge.collapsed.gff	exon	64423998	64424090	.	-	.	gene_id "SE:1:64408708-64423998:64424090-64425199:-"; transcript_id "SE:1:64408708-64423998:64424090-64425199:-:alternative1";
1	hq_isoforms.fasta.no5merge.collapsed.gff	exon	64425199	64425299	.	-	.	gene_id "SE:1:64408708-64423998:64424090-64425199:-"; transcript_id "SE:1:64408708-64423998:64424090-64425199:-:alternative1";
1	hq_isoforms.fasta.no5merge.collapsed.gff	exon	64375859	64375959	.	-	.	gene_id "SE:1:64375959-64379138:64379227-64380326:-"; transcript_id "SE:1:64375959-64379138:64379227-64380326:-:alternative2";
1	hq_isoforms.fasta.no5merge.collapsed.gff	exon	64380326	64380426	.	-	.	gene_id "SE:1:64375959-64379138:64379227-64380326:-"; transcript_id "SE:1:64375959-64379138:64379227-64380326:-:alternative2";
1	hq_isoforms.fasta.no5merge.collapsed.gff	exon	64375859	64375959	.	-	.	gene_id "SE:1:64375959-64379138:64379227-64380326:-"; transcript_id "SE:1:64375959-64379138:64379227-64380326:-:alternative1";
1	hq_isoforms.fasta.no5merge.collapsed.gff	exon	64379138	64379227	.	-	.	gene_id "SE:1:64375959-64379138:64379227-64380326:-"; transcript_id "SE:1:64375959-64379138:64379227-64380326:-:alternative1";
1	hq_isoforms.fasta.no5merge.collapsed.gff	exon	64380326	64380426	.	-	.	gene_id "SE:1:64375959-64379138:64379227-64380326:-"; transcript_id "SE:1:64375959-64379138:64379227-64380326:-:alternative1";
1	hq_isoforms.fasta.no5merge.collapsed.gff	exon	64408608	64408708	.	-	.	gene_id "SE:1:64408708-64409380:64409487-64411845:-"; transcript_id "SE:1:64408708-64409380:64409487-64411845:-:alternative2";
1	hq_isoforms.fasta.no5merge.collapsed.gff	exon	64411845	64411945	.	-	.	gene_id "SE:1:64408708-64409380:64409487-64411845:-"; transcript_id "SE:1:64408708-64409380:64409487-64411845:-:alternative2";
1	hq_isoforms.fasta.no5merge.collapsed.gff	exon	64408608	64408708	.	-	.	gene_id "SE:1:64408708-64409380:64409487-64411845:-"; transcript_id "SE:1:64408708-64409380:64409487-64411845:-:alternative1";
1	hq_isoforms.fasta.no5merge.collapsed.gff	exon	64409380	64409487	.	-	.	gene_id "SE:1:64408708-64409380:64409487-64411845:-"; transcript_id "SE:1:64408708-64409380:64409487-64411845:-:alternative1";
1	hq_isoforms.fasta.no5merge.collapsed.gff	exon	64411845	64411945	.	-	.	gene_id "SE:1:64408708-64409380:64409487-64411845:-"; transcript_id "SE:1:64408708-64409380:64409487-64411845:-:alternative1";
1	hq_isoforms.fasta.no5merge.collapsed.gff	exon	65429024	65429124	.	-	.	gene_id "SE:1:65429124-65470461:65470519-65508235:-"; transcript_id "SE:1:65429124-65470461:65470519-65508235:-:alternative2";
1	hq_isoforms.fasta.no5merge.collapsed.gff	exon	65508235	65508335	.	-	.	gene_id "SE:1:65429124-65470461:65470519-65508235:-"; transcript_id "SE:1:65429124-65470461:65470519-65508235:-:alternative2";
1	hq_isoforms.fasta.no5merge.collapsed.gff	exon	65429024	65429124	.	-	.	gene_id "SE:1:65429124-65470461:65470519-65508235:-"; transcript_id "SE:1:65429124-65470461:65470519-65508235:-:alternative1";
1	hq_isoforms.fasta.no5merge.collapsed.gff	exon	65470461	65470519	.	-	.	gene_id "SE:1:65429124-65470461:65470519-65508235:-"; transcript_id "SE:1:65429124-65470461:65470519-65508235:-:alternative1";
1	hq_isoforms.fasta.no5merge.collapsed.gff	exon	65508235	65508335	.	-	.	gene_id "SE:1:65429124-65470461:65470519-65508235:-"; transcript_id "SE:1:65429124-65470461:65470519-65508235:-:alternative1";
1	hq_isoforms.fasta.no5merge.collapsed.gff	exon	67850166	67850266	.	-	.	gene_id "SE:1:67850266-67853475:67853650-67896462:-"; transcript_id "SE:1:67850266-67853475:67853650-67896462:-:alternative2";
1	hq_isoforms.fasta.no5merge.collapsed.gff	exon	67896462	67896562	.	-	.	gene_id "SE:1:67850266-67853475:67853650-67896462:-"; transcript_id "SE:1:67850266-67853475:67853650-67896462:-:alternative2";
1	hq_isoforms.fasta.no5merge.collapsed.gff	exon	67850166	67850266	.	-	.	gene_id "SE:1:67850266-67853475:67853650-67896462:-"; transcript_id "SE:1:67850266-67853475:67853650-67896462:-:alternative1";
1	hq_isoforms.fasta.no5merge.collapsed.gff	exon	67853475	67853650	.	-	.	gene_id "SE:1:67850266-67853475:67853650-67896462:-"; transcript_id "SE:1:67850266-67853475:67853650-67896462:-:alternative1";
1	hq_isoforms.fasta.no5merge.collapsed.gff	exon	67896462	67896562	.	-	.	gene_id "SE:1:67850266-67853475:67853650-67896462:-"; transcript_id "SE:1:67850266-67853475:67853650-67896462:-:alternative1";
1	hq_isoforms.fasta.no5merge.collapsed.gff	exon	68277102	68277202	.	-	.	gene_id "SE:1:68277202-68287550:68287614-68308163:-"; transcript_id "SE:1:68277202-68287550:68287614-68308163:-:alternative2";
1	hq_isoforms.fasta.no5merge.collapsed.gff	exon	68308163	68308263	.	-	.	gene_id "SE:1:68277202-68287550:68287614-68308163:-"; transcript_id "SE:1:68277202-68287550:68287614-68308163:-:alternative2";
1	hq_isoforms.fasta.no5merge.collapsed.gff	exon	68277102	68277202	.	-	.	gene_id "SE:1:68277202-68287550:68287614-68308163:-"; transcript_id "SE:1:68277202-68287550:68287614-68308163:-:alternative1";
1	hq_isoforms.fasta.no5merge.collapsed.gff	exon	68287550	68287614	.	-	.	gene_id "SE:1:68277202-68287550:68287614-68308163:-"; transcript_id "SE:1:68277202-68287550:68287614-68308163:-:alternative1";
1	hq_isoforms.fasta.no5merge.collapsed.gff	exon	68308163	68308263	.	-	.	gene_id "SE:1:68277202-68287550:68287614-68308163:-"; transcript_id "SE:1:68277202-68287550:68287614-68308163:-:alternative1";
1	hq_isoforms.fasta.no5merge.collapsed.gff	exon	68287514	68287614	.	-	.	gene_id "SE:1:68287614-68307688:68307761-68308163:-"; transcript_id "SE:1:68287614-68307688:68307761-68308163:-:alternative2";
1	hq_isoforms.fasta.no5merge.collapsed.gff	exon	68308163	68308263	.	-	.	gene_id "SE:1:68287614-68307688:68307761-68308163:-"; transcript_id "SE:1:68287614-68307688:68307761-68308163:-:alternative2";
1	hq_isoforms.fasta.no5merge.collapsed.gff	exon	68287514	68287614	.	-	.	gene_id "SE:1:68287614-68307688:68307761-68308163:-"; transcript_id "SE:1:68287614-68307688:68307761-68308163:-:alternative1";
1	hq_isoforms.fasta.no5merge.collapsed.gff	exon	68307688	68307761	.	-	.	gene_id "SE:1:68287614-68307688:68307761-68308163:-"; transcript_id "SE:1:68287614-68307688:68307761-68308163:-:alternative1";
1	hq_isoforms.fasta.no5merge.collapsed.gff	exon	68308163	68308263	.	-	.	gene_id "SE:1:68287614-68307688:68307761-68308163:-"; transcript_id "SE:1:68287614-68307688:68307761-68308163:-:alternative1";
1	hq_isoforms.fasta.no5merge.collapsed.gff	exon	68230285	68230385	.	-	.	gene_id "SE:1:68230385-68231589:68231645-68264069:-"; transcript_id "SE:1:68230385-68231589:68231645-68264069:-:alternative2";
1	hq_isoforms.fasta.no5merge.collapsed.gff	exon	68264069	68264169	.	-	.	gene_id "SE:1:68230385-68231589:68231645-68264069:-"; transcript_id "SE:1:68230385-68231589:68231645-68264069:-:alternative2";
1	hq_isoforms.fasta.no5merge.collapsed.gff	exon	68230285	68230385	.	-	.	gene_id "SE:1:68230385-68231589:68231645-68264069:-"; transcript_id "SE:1:68230385-68231589:68231645-68264069:-:alternative1";
1	hq_isoforms.fasta.no5merge.collapsed.gff	exon	68231589	68231645	.	-	.	gene_id "SE:1:68230385-68231589:68231645-68264069:-"; transcript_id "SE:1:68230385-68231589:68231645-68264069:-:alternative1";
1	hq_isoforms.fasta.no5merge.collapsed.gff	exon	68264069	68264169	.	-	.	gene_id "SE:1:68230385-68231589:68231645-68264069:-"; transcript_id "SE:1:68230385-68231589:68231645-68264069:-:alternative1";
1	hq_isoforms.fasta.no5merge.collapsed.gff	exon	68264073	68264173	.	-	.	gene_id "SE:1:68264173-68264954:68265076-68265628:-"; transcript_id "SE:1:68264173-68264954:68265076-68265628:-:alternative2";
1	hq_isoforms.fasta.no5merge.collapsed.gff	exon	68265628	68265728	.	-	.	gene_id "SE:1:68264173-68264954:68265076-68265628:-"; transcript_id "SE:1:68264173-68264954:68265076-68265628:-:alternative2";
1	hq_isoforms.fasta.no5merge.collapsed.gff	exon	68264073	68264173	.	-	.	gene_id "SE:1:68264173-68264954:68265076-68265628:-"; transcript_id "SE:1:68264173-68264954:68265076-68265628:-:alternative1";
1	hq_isoforms.fasta.no5merge.collapsed.gff	exon	68264954	68265076	.	-	.	gene_id "SE:1:68264173-68264954:68265076-68265628:-"; transcript_id "SE:1:68264173-68264954:68265076-68265628:-:alternative1";
1	hq_isoforms.fasta.no5merge.collapsed.gff	exon	68265628	68265728	.	-	.	gene_id "SE:1:68264173-68264954:68265076-68265628:-"; transcript_id "SE:1:68264173-68264954:68265076-68265628:-:alternative1";
1	hq_isoforms.fasta.no5merge.collapsed.gff	exon	68277102	68277202	.	-	.	gene_id "SE:1:68277202-68280088:68280298-68281181:-"; transcript_id "SE:1:68277202-68280088:68280298-68281181:-:alternative2";
1	hq_isoforms.fasta.no5merge.collapsed.gff	exon	68281181	68281281	.	-	.	gene_id "SE:1:68277202-68280088:68280298-68281181:-"; transcript_id "SE:1:68277202-68280088:68280298-68281181:-:alternative2";
1	hq_isoforms.fasta.no5merge.collapsed.gff	exon	68277102	68277202	.	-	.	gene_id "SE:1:68277202-68280088:68280298-68281181:-"; transcript_id "SE:1:68277202-68280088:68280298-68281181:-:alternative1";
1	hq_isoforms.fasta.no5merge.collapsed.gff	exon	68280088	68280298	.	-	.	gene_id "SE:1:68277202-68280088:68280298-68281181:-"; transcript_id "SE:1:68277202-68280088:68280298-68281181:-:alternative1";
1	hq_isoforms.fasta.no5merge.collapsed.gff	exon	68281181	68281281	.	-	.	gene_id "SE:1:68277202-68280088:68280298-68281181:-"; transcript_id "SE:1:68277202-68280088:68280298-68281181:-:alternative1";
1	hq_isoforms.fasta.no5merge.collapsed.gff	exon	69775840	69775940	.	-	.	gene_id "SE:1:69775940-69813401:69814801-69824746:-"; transcript_id "SE:1:69775940-69813401:69814801-69824746:-:alternative2";
1	hq_isoforms.fasta.no5merge.collapsed.gff	exon	69824746	69824846	.	-	.	gene_id "SE:1:69775940-69813401:69814801-69824746:-"; transcript_id "SE:1:69775940-69813401:69814801-69824746:-:alternative2";
1	hq_isoforms.fasta.no5merge.collapsed.gff	exon	69775840	69775940	.	-	.	gene_id "SE:1:69775940-69813401:69814801-69824746:-"; transcript_id "SE:1:69775940-69813401:69814801-69824746:-:alternative1";
1	hq_isoforms.fasta.no5merge.collapsed.gff	exon	69813401	69814801	.	-	.	gene_id "SE:1:69775940-69813401:69814801-69824746:-"; transcript_id "SE:1:69775940-69813401:69814801-69824746:-:alternative1";
1	hq_isoforms.fasta.no5merge.collapsed.gff	exon	69824746	69824846	.	-	.	gene_id "SE:1:69775940-69813401:69814801-69824746:-"; transcript_id "SE:1:69775940-69813401:69814801-69824746:-:alternative1";
1	hq_isoforms.fasta.no5merge.collapsed.gff	exon	69908433	69908533	.	-	.	gene_id "SE:1:69908533-69909146:69909223-69910184:-"; transcript_id "SE:1:69908533-69909146:69909223-69910184:-:alternative2";
1	hq_isoforms.fasta.no5merge.collapsed.gff	exon	69910184	69910284	.	-	.	gene_id "SE:1:69908533-69909146:69909223-69910184:-"; transcript_id "SE:1:69908533-69909146:69909223-69910184:-:alternative2";
1	hq_isoforms.fasta.no5merge.collapsed.gff	exon	69908433	69908533	.	-	.	gene_id "SE:1:69908533-69909146:69909223-69910184:-"; transcript_id "SE:1:69908533-69909146:69909223-69910184:-:alternative1";
1	hq_isoforms.fasta.no5merge.collapsed.gff	exon	69909146	69909223	.	-	.	gene_id "SE:1:69908533-69909146:69909223-69910184:-"; transcript_id "SE:1:69908533-69909146:69909223-69910184:-:alternative1";
1	hq_isoforms.fasta.no5merge.collapsed.gff	exon	69910184	69910284	.	-	.	gene_id "SE:1:69908533-69909146:69909223-69910184:-"; transcript_id "SE:1:69908533-69909146:69909223-69910184:-:alternative1";
1	hq_isoforms.fasta.no5merge.collapsed.gff	exon	69950418	69950518	.	-	.	gene_id "SE:1:69950518-69953571:69953773-69956668:-"; transcript_id "SE:1:69950518-69953571:69953773-69956668:-:alternative2";
1	hq_isoforms.fasta.no5merge.collapsed.gff	exon	69956668	69956768	.	-	.	gene_id "SE:1:69950518-69953571:69953773-69956668:-"; transcript_id "SE:1:69950518-69953571:69953773-69956668:-:alternative2";
1	hq_isoforms.fasta.no5merge.collapsed.gff	exon	69950418	69950518	.	-	.	gene_id "SE:1:69950518-69953571:69953773-69956668:-"; transcript_id "SE:1:69950518-69953571:69953773-69956668:-:alternative1";
1	hq_isoforms.fasta.no5merge.collapsed.gff	exon	69953571	69953773	.	-	.	gene_id "SE:1:69950518-69953571:69953773-69956668:-"; transcript_id "SE:1:69950518-69953571:69953773-69956668:-:alternative1";
1	hq_isoforms.fasta.no5merge.collapsed.gff	exon	69956668	69956768	.	-	.	gene_id "SE:1:69950518-69953571:69953773-69956668:-"; transcript_id "SE:1:69950518-69953571:69953773-69956668:-:alternative1";
1	hq_isoforms.fasta.no5merge.collapsed.gff	exon	69961128	69961228	.	-	.	gene_id "SE:1:69961228-69967699:69967744-69969604:-"; transcript_id "SE:1:69961228-69967699:69967744-69969604:-:alternative2";
1	hq_isoforms.fasta.no5merge.collapsed.gff	exon	69969604	69969704	.	-	.	gene_id "SE:1:69961228-69967699:69967744-69969604:-"; transcript_id "SE:1:69961228-69967699:69967744-69969604:-:alternative2";
1	hq_isoforms.fasta.no5merge.collapsed.gff	exon	69961128	69961228	.	-	.	gene_id "SE:1:69961228-69967699:69967744-69969604:-"; transcript_id "SE:1:69961228-69967699:69967744-69969604:-:alternative1";
1	hq_isoforms.fasta.no5merge.collapsed.gff	exon	69967699	69967744	.	-	.	gene_id "SE:1:69961228-69967699:69967744-69969604:-"; transcript_id "SE:1:69961228-69967699:69967744-69969604:-:alternative1";
1	hq_isoforms.fasta.no5merge.collapsed.gff	exon	69969604	69969704	.	-	.	gene_id "SE:1:69961228-69967699:69967744-69969604:-"; transcript_id "SE:1:69961228-69967699:69967744-69969604:-:alternative1";
1	hq_isoforms.fasta.no5merge.collapsed.gff	exon	69950418	69950518	.	-	.	gene_id "SE:1:69950518-69950869:69950961-69953571:-"; transcript_id "SE:1:69950518-69950869:69950961-69953571:-:alternative2";
1	hq_isoforms.fasta.no5merge.collapsed.gff	exon	69953571	69953671	.	-	.	gene_id "SE:1:69950518-69950869:69950961-69953571:-"; transcript_id "SE:1:69950518-69950869:69950961-69953571:-:alternative2";
1	hq_isoforms.fasta.no5merge.collapsed.gff	exon	69950418	69950518	.	-	.	gene_id "SE:1:69950518-69950869:69950961-69953571:-"; transcript_id "SE:1:69950518-69950869:69950961-69953571:-:alternative1";
1	hq_isoforms.fasta.no5merge.collapsed.gff	exon	69950869	69950961	.	-	.	gene_id "SE:1:69950518-69950869:69950961-69953571:-"; transcript_id "SE:1:69950518-69950869:69950961-69953571:-:alternative1";
1	hq_isoforms.fasta.no5merge.collapsed.gff	exon	69953571	69953671	.	-	.	gene_id "SE:1:69950518-69950869:69950961-69953571:-"; transcript_id "SE:1:69950518-69950869:69950961-69953571:-:alternative1";
1	hq_isoforms.fasta.no5merge.collapsed.gff	exon	69961128	69961228	.	-	.	gene_id "SE:1:69961228-69967699:69967744-69981922:-"; transcript_id "SE:1:69961228-69967699:69967744-69981922:-:alternative2";
1	hq_isoforms.fasta.no5merge.collapsed.gff	exon	69981922	69982022	.	-	.	gene_id "SE:1:69961228-69967699:69967744-69981922:-"; transcript_id "SE:1:69961228-69967699:69967744-69981922:-:alternative2";
1	hq_isoforms.fasta.no5merge.collapsed.gff	exon	69961128	69961228	.	-	.	gene_id "SE:1:69961228-69967699:69967744-69981922:-"; transcript_id "SE:1:69961228-69967699:69967744-69981922:-:alternative1";
1	hq_isoforms.fasta.no5merge.collapsed.gff	exon	69967699	69967744	.	-	.	gene_id "SE:1:69961228-69967699:69967744-69981922:-"; transcript_id "SE:1:69961228-69967699:69967744-69981922:-:alternative1";
1	hq_isoforms.fasta.no5merge.collapsed.gff	exon	69981922	69982022	.	-	.	gene_id "SE:1:69961228-69967699:69967744-69981922:-"; transcript_id "SE:1:69961228-69967699:69967744-69981922:-:alternative1";
1	hq_isoforms.fasta.no5merge.collapsed.gff	exon	69961128	69961228	.	-	.	gene_id "SE:1:69961228-69969604:69970162-69981922:-"; transcript_id "SE:1:69961228-69969604:69970162-69981922:-:alternative2";
1	hq_isoforms.fasta.no5merge.collapsed.gff	exon	69981922	69982022	.	-	.	gene_id "SE:1:69961228-69969604:69970162-69981922:-"; transcript_id "SE:1:69961228-69969604:69970162-69981922:-:alternative2";
1	hq_isoforms.fasta.no5merge.collapsed.gff	exon	69961128	69961228	.	-	.	gene_id "SE:1:69961228-69969604:69970162-69981922:-"; transcript_id "SE:1:69961228-69969604:69970162-69981922:-:alternative1";
1	hq_isoforms.fasta.no5merge.collapsed.gff	exon	69969604	69970162	.	-	.	gene_id "SE:1:69961228-69969604:69970162-69981922:-"; transcript_id "SE:1:69961228-69969604:69970162-69981922:-:alternative1";
1	hq_isoforms.fasta.no5merge.collapsed.gff	exon	69981922	69982022	.	-	.	gene_id "SE:1:69961228-69969604:69970162-69981922:-"; transcript_id "SE:1:69961228-69969604:69970162-69981922:-:alternative1";
1	hq_isoforms.fasta.no5merge.collapsed.gff	exon	69967644	69967744	.	-	.	gene_id "SE:1:69967744-69969604:69970162-69981922:-"; transcript_id "SE:1:69967744-69969604:69970162-69981922:-:alternative2";
1	hq_isoforms.fasta.no5merge.collapsed.gff	exon	69981922	69982022	.	-	.	gene_id "SE:1:69967744-69969604:69970162-69981922:-"; transcript_id "SE:1:69967744-69969604:69970162-69981922:-:alternative2";
1	hq_isoforms.fasta.no5merge.collapsed.gff	exon	69967644	69967744	.	-	.	gene_id "SE:1:69967744-69969604:69970162-69981922:-"; transcript_id "SE:1:69967744-69969604:69970162-69981922:-:alternative1";
1	hq_isoforms.fasta.no5merge.collapsed.gff	exon	69969604	69970162	.	-	.	gene_id "SE:1:69967744-69969604:69970162-69981922:-"; transcript_id "SE:1:69967744-69969604:69970162-69981922:-:alternative1";
1	hq_isoforms.fasta.no5merge.collapsed.gff	exon	69981922	69982022	.	-	.	gene_id "SE:1:69967744-69969604:69970162-69981922:-"; transcript_id "SE:1:69967744-69969604:69970162-69981922:-:alternative1";
1	hq_isoforms.fasta.no5merge.collapsed.gff	exon	70080464	70080564	.	-	.	gene_id "SE:1:70080564-70082067:70082101-70085335:-"; transcript_id "SE:1:70080564-70082067:70082101-70085335:-:alternative2";
1	hq_isoforms.fasta.no5merge.collapsed.gff	exon	70085335	70085435	.	-	.	gene_id "SE:1:70080564-70082067:70082101-70085335:-"; transcript_id "SE:1:70080564-70082067:70082101-70085335:-:alternative2";
1	hq_isoforms.fasta.no5merge.collapsed.gff	exon	70080464	70080564	.	-	.	gene_id "SE:1:70080564-70082067:70082101-70085335:-"; transcript_id "SE:1:70080564-70082067:70082101-70085335:-:alternative1";
1	hq_isoforms.fasta.no5merge.collapsed.gff	exon	70082067	70082101	.	-	.	gene_id "SE:1:70080564-70082067:70082101-70085335:-"; transcript_id "SE:1:70080564-70082067:70082101-70085335:-:alternative1";
1	hq_isoforms.fasta.no5merge.collapsed.gff	exon	70085335	70085435	.	-	.	gene_id "SE:1:70080564-70082067:70082101-70085335:-"; transcript_id "SE:1:70080564-70082067:70082101-70085335:-:alternative1";
1	hq_isoforms.fasta.no5merge.collapsed.gff	exon	70085340	70085440	.	-	.	gene_id "SE:1:70085440-70100158:70100432-70106505:-"; transcript_id "SE:1:70085440-70100158:70100432-70106505:-:alternative2";
1	hq_isoforms.fasta.no5merge.collapsed.gff	exon	70106505	70106605	.	-	.	gene_id "SE:1:70085440-70100158:70100432-70106505:-"; transcript_id "SE:1:70085440-70100158:70100432-70106505:-:alternative2";
1	hq_isoforms.fasta.no5merge.collapsed.gff	exon	70085340	70085440	.	-	.	gene_id "SE:1:70085440-70100158:70100432-70106505:-"; transcript_id "SE:1:70085440-70100158:70100432-70106505:-:alternative1";
1	hq_isoforms.fasta.no5merge.collapsed.gff	exon	70100158	70100432	.	-	.	gene_id "SE:1:70085440-70100158:70100432-70106505:-"; transcript_id "SE:1:70085440-70100158:70100432-70106505:-:alternative1";
1	hq_isoforms.fasta.no5merge.collapsed.gff	exon	70106505	70106605	.	-	.	gene_id "SE:1:70085440-70100158:70100432-70106505:-"; transcript_id "SE:1:70085440-70100158:70100432-70106505:-:alternative1";
1	hq_isoforms.fasta.no5merge.collapsed.gff	exon	70031787	70031887	.	-	.	gene_id "SE:1:70031887-70040275:70040420-70043295:-"; transcript_id "SE:1:70031887-70040275:70040420-70043295:-:alternative2";
1	hq_isoforms.fasta.no5merge.collapsed.gff	exon	70043295	70043395	.	-	.	gene_id "SE:1:70031887-70040275:70040420-70043295:-"; transcript_id "SE:1:70031887-70040275:70040420-70043295:-:alternative2";
1	hq_isoforms.fasta.no5merge.collapsed.gff	exon	70031787	70031887	.	-	.	gene_id "SE:1:70031887-70040275:70040420-70043295:-"; transcript_id "SE:1:70031887-70040275:70040420-70043295:-:alternative1";
1	hq_isoforms.fasta.no5merge.collapsed.gff	exon	70040275	70040420	.	-	.	gene_id "SE:1:70031887-70040275:70040420-70043295:-"; transcript_id "SE:1:70031887-70040275:70040420-70043295:-:alternative1";
1	hq_isoforms.fasta.no5merge.collapsed.gff	exon	70043295	70043395	.	-	.	gene_id "SE:1:70031887-70040275:70040420-70043295:-"; transcript_id "SE:1:70031887-70040275:70040420-70043295:-:alternative1";
1	hq_isoforms.fasta.no5merge.collapsed.gff	exon	70100332	70100432	.	-	.	gene_id "SE:1:70100432-70105209:70105282-70106505:-"; transcript_id "SE:1:70100432-70105209:70105282-70106505:-:alternative2";
1	hq_isoforms.fasta.no5merge.collapsed.gff	exon	70106505	70106605	.	-	.	gene_id "SE:1:70100432-70105209:70105282-70106505:-"; transcript_id "SE:1:70100432-70105209:70105282-70106505:-:alternative2";
1	hq_isoforms.fasta.no5merge.collapsed.gff	exon	70100332	70100432	.	-	.	gene_id "SE:1:70100432-70105209:70105282-70106505:-"; transcript_id "SE:1:70100432-70105209:70105282-70106505:-:alternative1";
1	hq_isoforms.fasta.no5merge.collapsed.gff	exon	70105209	70105282	.	-	.	gene_id "SE:1:70100432-70105209:70105282-70106505:-"; transcript_id "SE:1:70100432-70105209:70105282-70106505:-:alternative1";
1	hq_isoforms.fasta.no5merge.collapsed.gff	exon	70106505	70106605	.	-	.	gene_id "SE:1:70100432-70105209:70105282-70106505:-"; transcript_id "SE:1:70100432-70105209:70105282-70106505:-:alternative1";
1	hq_isoforms.fasta.no5merge.collapsed.gff	exon	70146336	70146436	.	-	.	gene_id "SE:1:70146436-70148027:70148061-70150091:-"; transcript_id "SE:1:70146436-70148027:70148061-70150091:-:alternative2";
1	hq_isoforms.fasta.no5merge.collapsed.gff	exon	70150091	70150191	.	-	.	gene_id "SE:1:70146436-70148027:70148061-70150091:-"; transcript_id "SE:1:70146436-70148027:70148061-70150091:-:alternative2";
1	hq_isoforms.fasta.no5merge.collapsed.gff	exon	70146336	70146436	.	-	.	gene_id "SE:1:70146436-70148027:70148061-70150091:-"; transcript_id "SE:1:70146436-70148027:70148061-70150091:-:alternative1";
1	hq_isoforms.fasta.no5merge.collapsed.gff	exon	70148027	70148061	.	-	.	gene_id "SE:1:70146436-70148027:70148061-70150091:-"; transcript_id "SE:1:70146436-70148027:70148061-70150091:-:alternative1";
1	hq_isoforms.fasta.no5merge.collapsed.gff	exon	70150091	70150191	.	-	.	gene_id "SE:1:70146436-70148027:70148061-70150091:-"; transcript_id "SE:1:70146436-70148027:70148061-70150091:-:alternative1";
1	hq_isoforms.fasta.no5merge.collapsed.gff	exon	70106581	70106681	.	-	.	gene_id "SE:1:70106681-70125102:70125237-70146291:-"; transcript_id "SE:1:70106681-70125102:70125237-70146291:-:alternative2";
1	hq_isoforms.fasta.no5merge.collapsed.gff	exon	70146291	70146391	.	-	.	gene_id "SE:1:70106681-70125102:70125237-70146291:-"; transcript_id "SE:1:70106681-70125102:70125237-70146291:-:alternative2";
1	hq_isoforms.fasta.no5merge.collapsed.gff	exon	70106581	70106681	.	-	.	gene_id "SE:1:70106681-70125102:70125237-70146291:-"; transcript_id "SE:1:70106681-70125102:70125237-70146291:-:alternative1";
1	hq_isoforms.fasta.no5merge.collapsed.gff	exon	70125102	70125237	.	-	.	gene_id "SE:1:70106681-70125102:70125237-70146291:-"; transcript_id "SE:1:70106681-70125102:70125237-70146291:-:alternative1";
1	hq_isoforms.fasta.no5merge.collapsed.gff	exon	70146291	70146391	.	-	.	gene_id "SE:1:70106681-70125102:70125237-70146291:-"; transcript_id "SE:1:70106681-70125102:70125237-70146291:-:alternative1";
1	hq_isoforms.fasta.no5merge.collapsed.gff	exon	70649950	70650050	.	-	.	gene_id "SE:1:70650050-70659683:70659847-70664914:-"; transcript_id "SE:1:70650050-70659683:70659847-70664914:-:alternative2";
1	hq_isoforms.fasta.no5merge.collapsed.gff	exon	70664914	70665014	.	-	.	gene_id "SE:1:70650050-70659683:70659847-70664914:-"; transcript_id "SE:1:70650050-70659683:70659847-70664914:-:alternative2";
1	hq_isoforms.fasta.no5merge.collapsed.gff	exon	70649950	70650050	.	-	.	gene_id "SE:1:70650050-70659683:70659847-70664914:-"; transcript_id "SE:1:70650050-70659683:70659847-70664914:-:alternative1";
1	hq_isoforms.fasta.no5merge.collapsed.gff	exon	70659683	70659847	.	-	.	gene_id "SE:1:70650050-70659683:70659847-70664914:-"; transcript_id "SE:1:70650050-70659683:70659847-70664914:-:alternative1";
1	hq_isoforms.fasta.no5merge.collapsed.gff	exon	70664914	70665014	.	-	.	gene_id "SE:1:70650050-70659683:70659847-70664914:-"; transcript_id "SE:1:70650050-70659683:70659847-70664914:-:alternative1";
1	hq_isoforms.fasta.no5merge.collapsed.gff	exon	70786977	70787077	.	-	.	gene_id "SE:1:70787077-70787730:70787810-70789353:-"; transcript_id "SE:1:70787077-70787730:70787810-70789353:-:alternative2";
1	hq_isoforms.fasta.no5merge.collapsed.gff	exon	70789353	70789453	.	-	.	gene_id "SE:1:70787077-70787730:70787810-70789353:-"; transcript_id "SE:1:70787077-70787730:70787810-70789353:-:alternative2";
1	hq_isoforms.fasta.no5merge.collapsed.gff	exon	70786977	70787077	.	-	.	gene_id "SE:1:70787077-70787730:70787810-70789353:-"; transcript_id "SE:1:70787077-70787730:70787810-70789353:-:alternative1";
1	hq_isoforms.fasta.no5merge.collapsed.gff	exon	70787730	70787810	.	-	.	gene_id "SE:1:70787077-70787730:70787810-70789353:-"; transcript_id "SE:1:70787077-70787730:70787810-70789353:-:alternative1";
1	hq_isoforms.fasta.no5merge.collapsed.gff	exon	70789353	70789453	.	-	.	gene_id "SE:1:70787077-70787730:70787810-70789353:-"; transcript_id "SE:1:70787077-70787730:70787810-70789353:-:alternative1";
1	hq_isoforms.fasta.no5merge.collapsed.gff	exon	71385090	71385190	.	-	.	gene_id "SE:1:71385190-71385312:71385390-71401140:-"; transcript_id "SE:1:71385190-71385312:71385390-71401140:-:alternative2";
1	hq_isoforms.fasta.no5merge.collapsed.gff	exon	71401140	71401240	.	-	.	gene_id "SE:1:71385190-71385312:71385390-71401140:-"; transcript_id "SE:1:71385190-71385312:71385390-71401140:-:alternative2";
1	hq_isoforms.fasta.no5merge.collapsed.gff	exon	71385090	71385190	.	-	.	gene_id "SE:1:71385190-71385312:71385390-71401140:-"; transcript_id "SE:1:71385190-71385312:71385390-71401140:-:alternative1";
1	hq_isoforms.fasta.no5merge.collapsed.gff	exon	71385312	71385390	.	-	.	gene_id "SE:1:71385190-71385312:71385390-71401140:-"; transcript_id "SE:1:71385190-71385312:71385390-71401140:-:alternative1";
1	hq_isoforms.fasta.no5merge.collapsed.gff	exon	71401140	71401240	.	-	.	gene_id "SE:1:71385190-71385312:71385390-71401140:-"; transcript_id "SE:1:71385190-71385312:71385390-71401140:-:alternative1";
1	hq_isoforms.fasta.no5merge.collapsed.gff	exon	71460221	71460321	.	-	.	gene_id "SE:1:71460321-71469364:71469474-71470620:-"; transcript_id "SE:1:71460321-71469364:71469474-71470620:-:alternative2";
1	hq_isoforms.fasta.no5merge.collapsed.gff	exon	71470620	71470720	.	-	.	gene_id "SE:1:71460321-71469364:71469474-71470620:-"; transcript_id "SE:1:71460321-71469364:71469474-71470620:-:alternative2";
1	hq_isoforms.fasta.no5merge.collapsed.gff	exon	71460221	71460321	.	-	.	gene_id "SE:1:71460321-71469364:71469474-71470620:-"; transcript_id "SE:1:71460321-71469364:71469474-71470620:-:alternative1";
1	hq_isoforms.fasta.no5merge.collapsed.gff	exon	71469364	71469474	.	-	.	gene_id "SE:1:71460321-71469364:71469474-71470620:-"; transcript_id "SE:1:71460321-71469364:71469474-71470620:-:alternative1";
1	hq_isoforms.fasta.no5merge.collapsed.gff	exon	71470620	71470720	.	-	.	gene_id "SE:1:71460321-71469364:71469474-71470620:-"; transcript_id "SE:1:71460321-71469364:71469474-71470620:-:alternative1";
1	hq_isoforms.fasta.no5merge.collapsed.gff	exon	71436269	71436369	.	-	.	gene_id "SE:1:71436369-71441858:71443287-71443877:-"; transcript_id "SE:1:71436369-71441858:71443287-71443877:-:alternative2";
1	hq_isoforms.fasta.no5merge.collapsed.gff	exon	71443877	71443977	.	-	.	gene_id "SE:1:71436369-71441858:71443287-71443877:-"; transcript_id "SE:1:71436369-71441858:71443287-71443877:-:alternative2";
1	hq_isoforms.fasta.no5merge.collapsed.gff	exon	71436269	71436369	.	-	.	gene_id "SE:1:71436369-71441858:71443287-71443877:-"; transcript_id "SE:1:71436369-71441858:71443287-71443877:-:alternative1";
1	hq_isoforms.fasta.no5merge.collapsed.gff	exon	71441858	71443287	.	-	.	gene_id "SE:1:71436369-71441858:71443287-71443877:-"; transcript_id "SE:1:71436369-71441858:71443287-71443877:-:alternative1";
1	hq_isoforms.fasta.no5merge.collapsed.gff	exon	71443877	71443977	.	-	.	gene_id "SE:1:71436369-71441858:71443287-71443877:-"; transcript_id "SE:1:71436369-71441858:71443287-71443877:-:alternative1";
1	hq_isoforms.fasta.no5merge.collapsed.gff	exon	71508482	71508582	.	-	.	gene_id "SE:1:71508582-71542913:71543060-71547630:-"; transcript_id "SE:1:71508582-71542913:71543060-71547630:-:alternative2";
1	hq_isoforms.fasta.no5merge.collapsed.gff	exon	71547630	71547730	.	-	.	gene_id "SE:1:71508582-71542913:71543060-71547630:-"; transcript_id "SE:1:71508582-71542913:71543060-71547630:-:alternative2";
1	hq_isoforms.fasta.no5merge.collapsed.gff	exon	71508482	71508582	.	-	.	gene_id "SE:1:71508582-71542913:71543060-71547630:-"; transcript_id "SE:1:71508582-71542913:71543060-71547630:-:alternative1";
1	hq_isoforms.fasta.no5merge.collapsed.gff	exon	71542913	71543060	.	-	.	gene_id "SE:1:71508582-71542913:71543060-71547630:-"; transcript_id "SE:1:71508582-71542913:71543060-71547630:-:alternative1";
1	hq_isoforms.fasta.no5merge.collapsed.gff	exon	71547630	71547730	.	-	.	gene_id "SE:1:71508582-71542913:71543060-71547630:-"; transcript_id "SE:1:71508582-71542913:71543060-71547630:-:alternative1";
1	hq_isoforms.fasta.no5merge.collapsed.gff	exon	71619307	71619407	.	-	.	gene_id "SE:1:71619407-71629691:71629804-71643766:-"; transcript_id "SE:1:71619407-71629691:71629804-71643766:-:alternative2";
1	hq_isoforms.fasta.no5merge.collapsed.gff	exon	71643766	71643866	.	-	.	gene_id "SE:1:71619407-71629691:71629804-71643766:-"; transcript_id "SE:1:71619407-71629691:71629804-71643766:-:alternative2";
1	hq_isoforms.fasta.no5merge.collapsed.gff	exon	71619307	71619407	.	-	.	gene_id "SE:1:71619407-71629691:71629804-71643766:-"; transcript_id "SE:1:71619407-71629691:71629804-71643766:-:alternative1";
1	hq_isoforms.fasta.no5merge.collapsed.gff	exon	71629691	71629804	.	-	.	gene_id "SE:1:71619407-71629691:71629804-71643766:-"; transcript_id "SE:1:71619407-71629691:71629804-71643766:-:alternative1";
1	hq_isoforms.fasta.no5merge.collapsed.gff	exon	71643766	71643866	.	-	.	gene_id "SE:1:71619407-71629691:71629804-71643766:-"; transcript_id "SE:1:71619407-71629691:71629804-71643766:-:alternative1";
1	hq_isoforms.fasta.no5merge.collapsed.gff	exon	71582206	71582306	.	-	.	gene_id "SE:1:71582306-71584704:71584801-71605098:-"; transcript_id "SE:1:71582306-71584704:71584801-71605098:-:alternative2";
1	hq_isoforms.fasta.no5merge.collapsed.gff	exon	71605098	71605198	.	-	.	gene_id "SE:1:71582306-71584704:71584801-71605098:-"; transcript_id "SE:1:71582306-71584704:71584801-71605098:-:alternative2";
1	hq_isoforms.fasta.no5merge.collapsed.gff	exon	71582206	71582306	.	-	.	gene_id "SE:1:71582306-71584704:71584801-71605098:-"; transcript_id "SE:1:71582306-71584704:71584801-71605098:-:alternative1";
1	hq_isoforms.fasta.no5merge.collapsed.gff	exon	71584704	71584801	.	-	.	gene_id "SE:1:71582306-71584704:71584801-71605098:-"; transcript_id "SE:1:71582306-71584704:71584801-71605098:-:alternative1";
1	hq_isoforms.fasta.no5merge.collapsed.gff	exon	71605098	71605198	.	-	.	gene_id "SE:1:71582306-71584704:71584801-71605098:-"; transcript_id "SE:1:71582306-71584704:71584801-71605098:-:alternative1";
1	hq_isoforms.fasta.no5merge.collapsed.gff	exon	71607451	71607551	.	-	.	gene_id "SE:1:71607551-71607672:71607808-71610713:-"; transcript_id "SE:1:71607551-71607672:71607808-71610713:-:alternative2";
1	hq_isoforms.fasta.no5merge.collapsed.gff	exon	71610713	71610813	.	-	.	gene_id "SE:1:71607551-71607672:71607808-71610713:-"; transcript_id "SE:1:71607551-71607672:71607808-71610713:-:alternative2";
1	hq_isoforms.fasta.no5merge.collapsed.gff	exon	71607451	71607551	.	-	.	gene_id "SE:1:71607551-71607672:71607808-71610713:-"; transcript_id "SE:1:71607551-71607672:71607808-71610713:-:alternative1";
1	hq_isoforms.fasta.no5merge.collapsed.gff	exon	71607672	71607808	.	-	.	gene_id "SE:1:71607551-71607672:71607808-71610713:-"; transcript_id "SE:1:71607551-71607672:71607808-71610713:-:alternative1";
1	hq_isoforms.fasta.no5merge.collapsed.gff	exon	71610713	71610813	.	-	.	gene_id "SE:1:71607551-71607672:71607808-71610713:-"; transcript_id "SE:1:71607551-71607672:71607808-71610713:-:alternative1";
1	hq_isoforms.fasta.no5merge.collapsed.gff	exon	71619307	71619407	.	-	.	gene_id "SE:1:71619407-71629691:71629950-71643766:-"; transcript_id "SE:1:71619407-71629691:71629950-71643766:-:alternative2";
1	hq_isoforms.fasta.no5merge.collapsed.gff	exon	71643766	71643866	.	-	.	gene_id "SE:1:71619407-71629691:71629950-71643766:-"; transcript_id "SE:1:71619407-71629691:71629950-71643766:-:alternative2";
1	hq_isoforms.fasta.no5merge.collapsed.gff	exon	71619307	71619407	.	-	.	gene_id "SE:1:71619407-71629691:71629950-71643766:-"; transcript_id "SE:1:71619407-71629691:71629950-71643766:-:alternative1";
1	hq_isoforms.fasta.no5merge.collapsed.gff	exon	71629691	71629950	.	-	.	gene_id "SE:1:71619407-71629691:71629950-71643766:-"; transcript_id "SE:1:71619407-71629691:71629950-71643766:-:alternative1";
1	hq_isoforms.fasta.no5merge.collapsed.gff	exon	71643766	71643866	.	-	.	gene_id "SE:1:71619407-71629691:71629950-71643766:-"; transcript_id "SE:1:71619407-71629691:71629950-71643766:-:alternative1";
1	hq_isoforms.fasta.no5merge.collapsed.gff	exon	72242137	72242237	.	-	.	gene_id "SE:1:72242237-72242644:72242784-72243834:-"; transcript_id "SE:1:72242237-72242644:72242784-72243834:-:alternative2";
1	hq_isoforms.fasta.no5merge.collapsed.gff	exon	72243834	72243934	.	-	.	gene_id "SE:1:72242237-72242644:72242784-72243834:-"; transcript_id "SE:1:72242237-72242644:72242784-72243834:-:alternative2";
1	hq_isoforms.fasta.no5merge.collapsed.gff	exon	72242137	72242237	.	-	.	gene_id "SE:1:72242237-72242644:72242784-72243834:-"; transcript_id "SE:1:72242237-72242644:72242784-72243834:-:alternative1";
1	hq_isoforms.fasta.no5merge.collapsed.gff	exon	72242644	72242784	.	-	.	gene_id "SE:1:72242237-72242644:72242784-72243834:-"; transcript_id "SE:1:72242237-72242644:72242784-72243834:-:alternative1";
1	hq_isoforms.fasta.no5merge.collapsed.gff	exon	72243834	72243934	.	-	.	gene_id "SE:1:72242237-72242644:72242784-72243834:-"; transcript_id "SE:1:72242237-72242644:72242784-72243834:-:alternative1";
1	hq_isoforms.fasta.no5merge.collapsed.gff	exon	72361994	72362094	.	-	.	gene_id "SE:1:72362094-72362522:72362693-72363709:-"; transcript_id "SE:1:72362094-72362522:72362693-72363709:-:alternative2";
1	hq_isoforms.fasta.no5merge.collapsed.gff	exon	72363709	72363809	.	-	.	gene_id "SE:1:72362094-72362522:72362693-72363709:-"; transcript_id "SE:1:72362094-72362522:72362693-72363709:-:alternative2";
1	hq_isoforms.fasta.no5merge.collapsed.gff	exon	72361994	72362094	.	-	.	gene_id "SE:1:72362094-72362522:72362693-72363709:-"; transcript_id "SE:1:72362094-72362522:72362693-72363709:-:alternative1";
1	hq_isoforms.fasta.no5merge.collapsed.gff	exon	72362522	72362693	.	-	.	gene_id "SE:1:72362094-72362522:72362693-72363709:-"; transcript_id "SE:1:72362094-72362522:72362693-72363709:-:alternative1";
1	hq_isoforms.fasta.no5merge.collapsed.gff	exon	72363709	72363809	.	-	.	gene_id "SE:1:72362094-72362522:72362693-72363709:-"; transcript_id "SE:1:72362094-72362522:72362693-72363709:-:alternative1";
1	hq_isoforms.fasta.no5merge.collapsed.gff	exon	72370028	72370128	.	-	.	gene_id "SE:1:72370128-72370559:72370630-72370992:-"; transcript_id "SE:1:72370128-72370559:72370630-72370992:-:alternative2";
1	hq_isoforms.fasta.no5merge.collapsed.gff	exon	72370992	72371092	.	-	.	gene_id "SE:1:72370128-72370559:72370630-72370992:-"; transcript_id "SE:1:72370128-72370559:72370630-72370992:-:alternative2";
1	hq_isoforms.fasta.no5merge.collapsed.gff	exon	72370028	72370128	.	-	.	gene_id "SE:1:72370128-72370559:72370630-72370992:-"; transcript_id "SE:1:72370128-72370559:72370630-72370992:-:alternative1";
1	hq_isoforms.fasta.no5merge.collapsed.gff	exon	72370559	72370630	.	-	.	gene_id "SE:1:72370128-72370559:72370630-72370992:-"; transcript_id "SE:1:72370128-72370559:72370630-72370992:-:alternative1";
1	hq_isoforms.fasta.no5merge.collapsed.gff	exon	72370992	72371092	.	-	.	gene_id "SE:1:72370128-72370559:72370630-72370992:-"; transcript_id "SE:1:72370128-72370559:72370630-72370992:-:alternative1";
1	hq_isoforms.fasta.no5merge.collapsed.gff	exon	73245815	73245915	.	-	.	gene_id "SE:1:73245915-73246610:73246671-73250697:-"; transcript_id "SE:1:73245915-73246610:73246671-73250697:-:alternative2";
1	hq_isoforms.fasta.no5merge.collapsed.gff	exon	73250697	73250797	.	-	.	gene_id "SE:1:73245915-73246610:73246671-73250697:-"; transcript_id "SE:1:73245915-73246610:73246671-73250697:-:alternative2";
1	hq_isoforms.fasta.no5merge.collapsed.gff	exon	73245815	73245915	.	-	.	gene_id "SE:1:73245915-73246610:73246671-73250697:-"; transcript_id "SE:1:73245915-73246610:73246671-73250697:-:alternative1";
1	hq_isoforms.fasta.no5merge.collapsed.gff	exon	73246610	73246671	.	-	.	gene_id "SE:1:73245915-73246610:73246671-73250697:-"; transcript_id "SE:1:73245915-73246610:73246671-73250697:-:alternative1";
1	hq_isoforms.fasta.no5merge.collapsed.gff	exon	73250697	73250797	.	-	.	gene_id "SE:1:73245915-73246610:73246671-73250697:-"; transcript_id "SE:1:73245915-73246610:73246671-73250697:-:alternative1";
1	hq_isoforms.fasta.no5merge.collapsed.gff	exon	73233272	73233372	.	-	.	gene_id "SE:1:73233372-73235517:73235549-73237019:-"; transcript_id "SE:1:73233372-73235517:73235549-73237019:-:alternative2";
1	hq_isoforms.fasta.no5merge.collapsed.gff	exon	73237019	73237119	.	-	.	gene_id "SE:1:73233372-73235517:73235549-73237019:-"; transcript_id "SE:1:73233372-73235517:73235549-73237019:-:alternative2";
1	hq_isoforms.fasta.no5merge.collapsed.gff	exon	73233272	73233372	.	-	.	gene_id "SE:1:73233372-73235517:73235549-73237019:-"; transcript_id "SE:1:73233372-73235517:73235549-73237019:-:alternative1";
1	hq_isoforms.fasta.no5merge.collapsed.gff	exon	73235517	73235549	.	-	.	gene_id "SE:1:73233372-73235517:73235549-73237019:-"; transcript_id "SE:1:73233372-73235517:73235549-73237019:-:alternative1";
1	hq_isoforms.fasta.no5merge.collapsed.gff	exon	73237019	73237119	.	-	.	gene_id "SE:1:73233372-73235517:73235549-73237019:-"; transcript_id "SE:1:73233372-73235517:73235549-73237019:-:alternative1";
1	hq_isoforms.fasta.no5merge.collapsed.gff	exon	73246571	73246671	.	-	.	gene_id "SE:1:73246671-73248086:73248118-73250697:-"; transcript_id "SE:1:73246671-73248086:73248118-73250697:-:alternative2";
1	hq_isoforms.fasta.no5merge.collapsed.gff	exon	73250697	73250797	.	-	.	gene_id "SE:1:73246671-73248086:73248118-73250697:-"; transcript_id "SE:1:73246671-73248086:73248118-73250697:-:alternative2";
1	hq_isoforms.fasta.no5merge.collapsed.gff	exon	73246571	73246671	.	-	.	gene_id "SE:1:73246671-73248086:73248118-73250697:-"; transcript_id "SE:1:73246671-73248086:73248118-73250697:-:alternative1";
1	hq_isoforms.fasta.no5merge.collapsed.gff	exon	73248086	73248118	.	-	.	gene_id "SE:1:73246671-73248086:73248118-73250697:-"; transcript_id "SE:1:73246671-73248086:73248118-73250697:-:alternative1";
1	hq_isoforms.fasta.no5merge.collapsed.gff	exon	73250697	73250797	.	-	.	gene_id "SE:1:73246671-73248086:73248118-73250697:-"; transcript_id "SE:1:73246671-73248086:73248118-73250697:-:alternative1";
1	hq_isoforms.fasta.no5merge.collapsed.gff	exon	73250711	73250811	.	-	.	gene_id "SE:1:73250811-73252318:73252410-73253016:-"; transcript_id "SE:1:73250811-73252318:73252410-73253016:-:alternative2";
1	hq_isoforms.fasta.no5merge.collapsed.gff	exon	73253016	73253116	.	-	.	gene_id "SE:1:73250811-73252318:73252410-73253016:-"; transcript_id "SE:1:73250811-73252318:73252410-73253016:-:alternative2";
1	hq_isoforms.fasta.no5merge.collapsed.gff	exon	73250711	73250811	.	-	.	gene_id "SE:1:73250811-73252318:73252410-73253016:-"; transcript_id "SE:1:73250811-73252318:73252410-73253016:-:alternative1";
1	hq_isoforms.fasta.no5merge.collapsed.gff	exon	73252318	73252410	.	-	.	gene_id "SE:1:73250811-73252318:73252410-73253016:-"; transcript_id "SE:1:73250811-73252318:73252410-73253016:-:alternative1";
1	hq_isoforms.fasta.no5merge.collapsed.gff	exon	73253016	73253116	.	-	.	gene_id "SE:1:73250811-73252318:73252410-73253016:-"; transcript_id "SE:1:73250811-73252318:73252410-73253016:-:alternative1";
1	hq_isoforms.fasta.no5merge.collapsed.gff	exon	73279245	73279345	.	-	.	gene_id "SE:1:73279345-73336050:73336239-73336403:-"; transcript_id "SE:1:73279345-73336050:73336239-73336403:-:alternative2";
1	hq_isoforms.fasta.no5merge.collapsed.gff	exon	73336403	73336503	.	-	.	gene_id "SE:1:73279345-73336050:73336239-73336403:-"; transcript_id "SE:1:73279345-73336050:73336239-73336403:-:alternative2";
1	hq_isoforms.fasta.no5merge.collapsed.gff	exon	73279245	73279345	.	-	.	gene_id "SE:1:73279345-73336050:73336239-73336403:-"; transcript_id "SE:1:73279345-73336050:73336239-73336403:-:alternative1";
1	hq_isoforms.fasta.no5merge.collapsed.gff	exon	73336050	73336239	.	-	.	gene_id "SE:1:73279345-73336050:73336239-73336403:-"; transcript_id "SE:1:73279345-73336050:73336239-73336403:-:alternative1";
1	hq_isoforms.fasta.no5merge.collapsed.gff	exon	73336403	73336503	.	-	.	gene_id "SE:1:73279345-73336050:73336239-73336403:-"; transcript_id "SE:1:73279345-73336050:73336239-73336403:-:alternative1";
1	hq_isoforms.fasta.no5merge.collapsed.gff	exon	73279245	73279345	.	-	.	gene_id "SE:1:73279345-73327030:73327145-73336403:-"; transcript_id "SE:1:73279345-73327030:73327145-73336403:-:alternative2";
1	hq_isoforms.fasta.no5merge.collapsed.gff	exon	73336403	73336503	.	-	.	gene_id "SE:1:73279345-73327030:73327145-73336403:-"; transcript_id "SE:1:73279345-73327030:73327145-73336403:-:alternative2";
1	hq_isoforms.fasta.no5merge.collapsed.gff	exon	73279245	73279345	.	-	.	gene_id "SE:1:73279345-73327030:73327145-73336403:-"; transcript_id "SE:1:73279345-73327030:73327145-73336403:-:alternative1";
1	hq_isoforms.fasta.no5merge.collapsed.gff	exon	73327030	73327145	.	-	.	gene_id "SE:1:73279345-73327030:73327145-73336403:-"; transcript_id "SE:1:73279345-73327030:73327145-73336403:-:alternative1";
1	hq_isoforms.fasta.no5merge.collapsed.gff	exon	73336403	73336503	.	-	.	gene_id "SE:1:73279345-73327030:73327145-73336403:-"; transcript_id "SE:1:73279345-73327030:73327145-73336403:-:alternative1";
1	hq_isoforms.fasta.no5merge.collapsed.gff	exon	73349482	73349582	.	-	.	gene_id "SE:1:73349582-73361390:73361808-73362785:-"; transcript_id "SE:1:73349582-73361390:73361808-73362785:-:alternative2";
1	hq_isoforms.fasta.no5merge.collapsed.gff	exon	73362785	73362885	.	-	.	gene_id "SE:1:73349582-73361390:73361808-73362785:-"; transcript_id "SE:1:73349582-73361390:73361808-73362785:-:alternative2";
1	hq_isoforms.fasta.no5merge.collapsed.gff	exon	73349482	73349582	.	-	.	gene_id "SE:1:73349582-73361390:73361808-73362785:-"; transcript_id "SE:1:73349582-73361390:73361808-73362785:-:alternative1";
1	hq_isoforms.fasta.no5merge.collapsed.gff	exon	73361390	73361808	.	-	.	gene_id "SE:1:73349582-73361390:73361808-73362785:-"; transcript_id "SE:1:73349582-73361390:73361808-73362785:-:alternative1";
1	hq_isoforms.fasta.no5merge.collapsed.gff	exon	73362785	73362885	.	-	.	gene_id "SE:1:73349582-73361390:73361808-73362785:-"; transcript_id "SE:1:73349582-73361390:73361808-73362785:-:alternative1";
1	hq_isoforms.fasta.no5merge.collapsed.gff	exon	73374106	73374206	.	-	.	gene_id "SE:1:73374206-73374791:73374897-73375885:-"; transcript_id "SE:1:73374206-73374791:73374897-73375885:-:alternative2";
1	hq_isoforms.fasta.no5merge.collapsed.gff	exon	73375885	73375985	.	-	.	gene_id "SE:1:73374206-73374791:73374897-73375885:-"; transcript_id "SE:1:73374206-73374791:73374897-73375885:-:alternative2";
1	hq_isoforms.fasta.no5merge.collapsed.gff	exon	73374106	73374206	.	-	.	gene_id "SE:1:73374206-73374791:73374897-73375885:-"; transcript_id "SE:1:73374206-73374791:73374897-73375885:-:alternative1";
1	hq_isoforms.fasta.no5merge.collapsed.gff	exon	73374791	73374897	.	-	.	gene_id "SE:1:73374206-73374791:73374897-73375885:-"; transcript_id "SE:1:73374206-73374791:73374897-73375885:-:alternative1";
1	hq_isoforms.fasta.no5merge.collapsed.gff	exon	73375885	73375985	.	-	.	gene_id "SE:1:73374206-73374791:73374897-73375885:-"; transcript_id "SE:1:73374206-73374791:73374897-73375885:-:alternative1";
1	hq_isoforms.fasta.no5merge.collapsed.gff	exon	73378856	73378956	.	-	.	gene_id "SE:1:73378956-73380911:73381003-73381670:-"; transcript_id "SE:1:73378956-73380911:73381003-73381670:-:alternative2";
1	hq_isoforms.fasta.no5merge.collapsed.gff	exon	73381670	73381770	.	-	.	gene_id "SE:1:73378956-73380911:73381003-73381670:-"; transcript_id "SE:1:73378956-73380911:73381003-73381670:-:alternative2";
1	hq_isoforms.fasta.no5merge.collapsed.gff	exon	73378856	73378956	.	-	.	gene_id "SE:1:73378956-73380911:73381003-73381670:-"; transcript_id "SE:1:73378956-73380911:73381003-73381670:-:alternative1";
1	hq_isoforms.fasta.no5merge.collapsed.gff	exon	73380911	73381003	.	-	.	gene_id "SE:1:73378956-73380911:73381003-73381670:-"; transcript_id "SE:1:73378956-73380911:73381003-73381670:-:alternative1";
1	hq_isoforms.fasta.no5merge.collapsed.gff	exon	73381670	73381770	.	-	.	gene_id "SE:1:73378956-73380911:73381003-73381670:-"; transcript_id "SE:1:73378956-73380911:73381003-73381670:-:alternative1";
1	hq_isoforms.fasta.no5merge.collapsed.gff	exon	73378856	73378956	.	-	.	gene_id "SE:1:73378956-73380911:73380999-73381670:-"; transcript_id "SE:1:73378956-73380911:73380999-73381670:-:alternative2";
1	hq_isoforms.fasta.no5merge.collapsed.gff	exon	73381670	73381770	.	-	.	gene_id "SE:1:73378956-73380911:73380999-73381670:-"; transcript_id "SE:1:73378956-73380911:73380999-73381670:-:alternative2";
1	hq_isoforms.fasta.no5merge.collapsed.gff	exon	73378856	73378956	.	-	.	gene_id "SE:1:73378956-73380911:73380999-73381670:-"; transcript_id "SE:1:73378956-73380911:73380999-73381670:-:alternative1";
1	hq_isoforms.fasta.no5merge.collapsed.gff	exon	73380911	73380999	.	-	.	gene_id "SE:1:73378956-73380911:73380999-73381670:-"; transcript_id "SE:1:73378956-73380911:73380999-73381670:-:alternative1";
1	hq_isoforms.fasta.no5merge.collapsed.gff	exon	73381670	73381770	.	-	.	gene_id "SE:1:73378956-73380911:73380999-73381670:-"; transcript_id "SE:1:73378956-73380911:73380999-73381670:-:alternative1";
1	hq_isoforms.fasta.no5merge.collapsed.gff	exon	73562683	73562783	.	-	.	gene_id "SE:1:73562783-73563969:73564105-73567009:-"; transcript_id "SE:1:73562783-73563969:73564105-73567009:-:alternative2";
1	hq_isoforms.fasta.no5merge.collapsed.gff	exon	73567009	73567109	.	-	.	gene_id "SE:1:73562783-73563969:73564105-73567009:-"; transcript_id "SE:1:73562783-73563969:73564105-73567009:-:alternative2";
1	hq_isoforms.fasta.no5merge.collapsed.gff	exon	73562683	73562783	.	-	.	gene_id "SE:1:73562783-73563969:73564105-73567009:-"; transcript_id "SE:1:73562783-73563969:73564105-73567009:-:alternative1";
1	hq_isoforms.fasta.no5merge.collapsed.gff	exon	73563969	73564105	.	-	.	gene_id "SE:1:73562783-73563969:73564105-73567009:-"; transcript_id "SE:1:73562783-73563969:73564105-73567009:-:alternative1";
1	hq_isoforms.fasta.no5merge.collapsed.gff	exon	73567009	73567109	.	-	.	gene_id "SE:1:73562783-73563969:73564105-73567009:-"; transcript_id "SE:1:73562783-73563969:73564105-73567009:-:alternative1";
1	hq_isoforms.fasta.no5merge.collapsed.gff	exon	74020732	74020832	.	-	.	gene_id "SE:1:74020832-74044960:74045058-74089254:-"; transcript_id "SE:1:74020832-74044960:74045058-74089254:-:alternative2";
1	hq_isoforms.fasta.no5merge.collapsed.gff	exon	74089254	74089354	.	-	.	gene_id "SE:1:74020832-74044960:74045058-74089254:-"; transcript_id "SE:1:74020832-74044960:74045058-74089254:-:alternative2";
1	hq_isoforms.fasta.no5merge.collapsed.gff	exon	74020732	74020832	.	-	.	gene_id "SE:1:74020832-74044960:74045058-74089254:-"; transcript_id "SE:1:74020832-74044960:74045058-74089254:-:alternative1";
1	hq_isoforms.fasta.no5merge.collapsed.gff	exon	74044960	74045058	.	-	.	gene_id "SE:1:74020832-74044960:74045058-74089254:-"; transcript_id "SE:1:74020832-74044960:74045058-74089254:-:alternative1";
1	hq_isoforms.fasta.no5merge.collapsed.gff	exon	74089254	74089354	.	-	.	gene_id "SE:1:74020832-74044960:74045058-74089254:-"; transcript_id "SE:1:74020832-74044960:74045058-74089254:-:alternative1";
1	hq_isoforms.fasta.no5merge.collapsed.gff	exon	74433615	74433715	.	-	.	gene_id "SE:1:74433715-74433822:74433899-74434569:-"; transcript_id "SE:1:74433715-74433822:74433899-74434569:-:alternative2";
1	hq_isoforms.fasta.no5merge.collapsed.gff	exon	74434569	74434669	.	-	.	gene_id "SE:1:74433715-74433822:74433899-74434569:-"; transcript_id "SE:1:74433715-74433822:74433899-74434569:-:alternative2";
1	hq_isoforms.fasta.no5merge.collapsed.gff	exon	74433615	74433715	.	-	.	gene_id "SE:1:74433715-74433822:74433899-74434569:-"; transcript_id "SE:1:74433715-74433822:74433899-74434569:-:alternative1";
1	hq_isoforms.fasta.no5merge.collapsed.gff	exon	74433822	74433899	.	-	.	gene_id "SE:1:74433715-74433822:74433899-74434569:-"; transcript_id "SE:1:74433715-74433822:74433899-74434569:-:alternative1";
1	hq_isoforms.fasta.no5merge.collapsed.gff	exon	74434569	74434669	.	-	.	gene_id "SE:1:74433715-74433822:74433899-74434569:-"; transcript_id "SE:1:74433715-74433822:74433899-74434569:-:alternative1";
1	hq_isoforms.fasta.no5merge.collapsed.gff	exon	74445950	74446050	.	-	.	gene_id "SE:1:74446050-74447062:74447170-74448122:-"; transcript_id "SE:1:74446050-74447062:74447170-74448122:-:alternative2";
1	hq_isoforms.fasta.no5merge.collapsed.gff	exon	74448122	74448222	.	-	.	gene_id "SE:1:74446050-74447062:74447170-74448122:-"; transcript_id "SE:1:74446050-74447062:74447170-74448122:-:alternative2";
1	hq_isoforms.fasta.no5merge.collapsed.gff	exon	74445950	74446050	.	-	.	gene_id "SE:1:74446050-74447062:74447170-74448122:-"; transcript_id "SE:1:74446050-74447062:74447170-74448122:-:alternative1";
1	hq_isoforms.fasta.no5merge.collapsed.gff	exon	74447062	74447170	.	-	.	gene_id "SE:1:74446050-74447062:74447170-74448122:-"; transcript_id "SE:1:74446050-74447062:74447170-74448122:-:alternative1";
1	hq_isoforms.fasta.no5merge.collapsed.gff	exon	74448122	74448222	.	-	.	gene_id "SE:1:74446050-74447062:74447170-74448122:-"; transcript_id "SE:1:74446050-74447062:74447170-74448122:-:alternative1";
1	hq_isoforms.fasta.no5merge.collapsed.gff	exon	74633059	74633159	.	-	.	gene_id "SE:1:74633159-74636562:74636659-74636869:-"; transcript_id "SE:1:74633159-74636562:74636659-74636869:-:alternative2";
1	hq_isoforms.fasta.no5merge.collapsed.gff	exon	74636869	74636969	.	-	.	gene_id "SE:1:74633159-74636562:74636659-74636869:-"; transcript_id "SE:1:74633159-74636562:74636659-74636869:-:alternative2";
1	hq_isoforms.fasta.no5merge.collapsed.gff	exon	74633059	74633159	.	-	.	gene_id "SE:1:74633159-74636562:74636659-74636869:-"; transcript_id "SE:1:74633159-74636562:74636659-74636869:-:alternative1";
1	hq_isoforms.fasta.no5merge.collapsed.gff	exon	74636562	74636659	.	-	.	gene_id "SE:1:74633159-74636562:74636659-74636869:-"; transcript_id "SE:1:74633159-74636562:74636659-74636869:-:alternative1";
1	hq_isoforms.fasta.no5merge.collapsed.gff	exon	74636869	74636969	.	-	.	gene_id "SE:1:74633159-74636562:74636659-74636869:-"; transcript_id "SE:1:74633159-74636562:74636659-74636869:-:alternative1";
1	hq_isoforms.fasta.no5merge.collapsed.gff	exon	74651245	74651345	.	-	.	gene_id "SE:1:74651345-74652187:74652366-74654193:-"; transcript_id "SE:1:74651345-74652187:74652366-74654193:-:alternative2";
1	hq_isoforms.fasta.no5merge.collapsed.gff	exon	74654193	74654293	.	-	.	gene_id "SE:1:74651345-74652187:74652366-74654193:-"; transcript_id "SE:1:74651345-74652187:74652366-74654193:-:alternative2";
1	hq_isoforms.fasta.no5merge.collapsed.gff	exon	74651245	74651345	.	-	.	gene_id "SE:1:74651345-74652187:74652366-74654193:-"; transcript_id "SE:1:74651345-74652187:74652366-74654193:-:alternative1";
1	hq_isoforms.fasta.no5merge.collapsed.gff	exon	74652187	74652366	.	-	.	gene_id "SE:1:74651345-74652187:74652366-74654193:-"; transcript_id "SE:1:74651345-74652187:74652366-74654193:-:alternative1";
1	hq_isoforms.fasta.no5merge.collapsed.gff	exon	74654193	74654293	.	-	.	gene_id "SE:1:74651345-74652187:74652366-74654193:-"; transcript_id "SE:1:74651345-74652187:74652366-74654193:-:alternative1";
1	hq_isoforms.fasta.no5merge.collapsed.gff	exon	74701639	74701739	.	-	.	gene_id "SE:1:74701739-74701835:74701957-74703245:-"; transcript_id "SE:1:74701739-74701835:74701957-74703245:-:alternative2";
1	hq_isoforms.fasta.no5merge.collapsed.gff	exon	74703245	74703345	.	-	.	gene_id "SE:1:74701739-74701835:74701957-74703245:-"; transcript_id "SE:1:74701739-74701835:74701957-74703245:-:alternative2";
1	hq_isoforms.fasta.no5merge.collapsed.gff	exon	74701639	74701739	.	-	.	gene_id "SE:1:74701739-74701835:74701957-74703245:-"; transcript_id "SE:1:74701739-74701835:74701957-74703245:-:alternative1";
1	hq_isoforms.fasta.no5merge.collapsed.gff	exon	74701835	74701957	.	-	.	gene_id "SE:1:74701739-74701835:74701957-74703245:-"; transcript_id "SE:1:74701739-74701835:74701957-74703245:-:alternative1";
1	hq_isoforms.fasta.no5merge.collapsed.gff	exon	74703245	74703345	.	-	.	gene_id "SE:1:74701739-74701835:74701957-74703245:-"; transcript_id "SE:1:74701739-74701835:74701957-74703245:-:alternative1";
1	hq_isoforms.fasta.no5merge.collapsed.gff	exon	74939114	74939214	.	-	.	gene_id "SE:1:74939214-74947006:74947121-74980385:-"; transcript_id "SE:1:74939214-74947006:74947121-74980385:-:alternative2";
1	hq_isoforms.fasta.no5merge.collapsed.gff	exon	74980385	74980485	.	-	.	gene_id "SE:1:74939214-74947006:74947121-74980385:-"; transcript_id "SE:1:74939214-74947006:74947121-74980385:-:alternative2";
1	hq_isoforms.fasta.no5merge.collapsed.gff	exon	74939114	74939214	.	-	.	gene_id "SE:1:74939214-74947006:74947121-74980385:-"; transcript_id "SE:1:74939214-74947006:74947121-74980385:-:alternative1";
1	hq_isoforms.fasta.no5merge.collapsed.gff	exon	74947006	74947121	.	-	.	gene_id "SE:1:74939214-74947006:74947121-74980385:-"; transcript_id "SE:1:74939214-74947006:74947121-74980385:-:alternative1";
1	hq_isoforms.fasta.no5merge.collapsed.gff	exon	74980385	74980485	.	-	.	gene_id "SE:1:74939214-74947006:74947121-74980385:-"; transcript_id "SE:1:74939214-74947006:74947121-74980385:-:alternative1";
1	hq_isoforms.fasta.no5merge.collapsed.gff	exon	75030782	75030882	.	-	.	gene_id "SE:1:75030882-75031726:75031827-75032809:-"; transcript_id "SE:1:75030882-75031726:75031827-75032809:-:alternative2";
1	hq_isoforms.fasta.no5merge.collapsed.gff	exon	75032809	75032909	.	-	.	gene_id "SE:1:75030882-75031726:75031827-75032809:-"; transcript_id "SE:1:75030882-75031726:75031827-75032809:-:alternative2";
1	hq_isoforms.fasta.no5merge.collapsed.gff	exon	75030782	75030882	.	-	.	gene_id "SE:1:75030882-75031726:75031827-75032809:-"; transcript_id "SE:1:75030882-75031726:75031827-75032809:-:alternative1";
1	hq_isoforms.fasta.no5merge.collapsed.gff	exon	75031726	75031827	.	-	.	gene_id "SE:1:75030882-75031726:75031827-75032809:-"; transcript_id "SE:1:75030882-75031726:75031827-75032809:-:alternative1";
1	hq_isoforms.fasta.no5merge.collapsed.gff	exon	75032809	75032909	.	-	.	gene_id "SE:1:75030882-75031726:75031827-75032809:-"; transcript_id "SE:1:75030882-75031726:75031827-75032809:-:alternative1";
1	hq_isoforms.fasta.no5merge.collapsed.gff	exon	75052409	75052509	.	-	.	gene_id "SE:1:75052509-75054255:75054350-75056842:-"; transcript_id "SE:1:75052509-75054255:75054350-75056842:-:alternative2";
1	hq_isoforms.fasta.no5merge.collapsed.gff	exon	75056842	75056942	.	-	.	gene_id "SE:1:75052509-75054255:75054350-75056842:-"; transcript_id "SE:1:75052509-75054255:75054350-75056842:-:alternative2";
1	hq_isoforms.fasta.no5merge.collapsed.gff	exon	75052409	75052509	.	-	.	gene_id "SE:1:75052509-75054255:75054350-75056842:-"; transcript_id "SE:1:75052509-75054255:75054350-75056842:-:alternative1";
1	hq_isoforms.fasta.no5merge.collapsed.gff	exon	75054255	75054350	.	-	.	gene_id "SE:1:75052509-75054255:75054350-75056842:-"; transcript_id "SE:1:75052509-75054255:75054350-75056842:-:alternative1";
1	hq_isoforms.fasta.no5merge.collapsed.gff	exon	75056842	75056942	.	-	.	gene_id "SE:1:75052509-75054255:75054350-75056842:-"; transcript_id "SE:1:75052509-75054255:75054350-75056842:-:alternative1";
1	hq_isoforms.fasta.no5merge.collapsed.gff	exon	75985025	75985125	.	-	.	gene_id "SE:1:75985125-75985773:75985948-76050467:-"; transcript_id "SE:1:75985125-75985773:75985948-76050467:-:alternative2";
1	hq_isoforms.fasta.no5merge.collapsed.gff	exon	76050467	76050567	.	-	.	gene_id "SE:1:75985125-75985773:75985948-76050467:-"; transcript_id "SE:1:75985125-75985773:75985948-76050467:-:alternative2";
1	hq_isoforms.fasta.no5merge.collapsed.gff	exon	75985025	75985125	.	-	.	gene_id "SE:1:75985125-75985773:75985948-76050467:-"; transcript_id "SE:1:75985125-75985773:75985948-76050467:-:alternative1";
1	hq_isoforms.fasta.no5merge.collapsed.gff	exon	75985773	75985948	.	-	.	gene_id "SE:1:75985125-75985773:75985948-76050467:-"; transcript_id "SE:1:75985125-75985773:75985948-76050467:-:alternative1";
1	hq_isoforms.fasta.no5merge.collapsed.gff	exon	76050467	76050567	.	-	.	gene_id "SE:1:75985125-75985773:75985948-76050467:-"; transcript_id "SE:1:75985125-75985773:75985948-76050467:-:alternative1";
1	hq_isoforms.fasta.no5merge.collapsed.gff	exon	75761728	75761828	.	-	.	gene_id "SE:1:75761828-75776554:75776719-75871712:-"; transcript_id "SE:1:75761828-75776554:75776719-75871712:-:alternative2";
1	hq_isoforms.fasta.no5merge.collapsed.gff	exon	75871712	75871812	.	-	.	gene_id "SE:1:75761828-75776554:75776719-75871712:-"; transcript_id "SE:1:75761828-75776554:75776719-75871712:-:alternative2";
1	hq_isoforms.fasta.no5merge.collapsed.gff	exon	75761728	75761828	.	-	.	gene_id "SE:1:75761828-75776554:75776719-75871712:-"; transcript_id "SE:1:75761828-75776554:75776719-75871712:-:alternative1";
1	hq_isoforms.fasta.no5merge.collapsed.gff	exon	75776554	75776719	.	-	.	gene_id "SE:1:75761828-75776554:75776719-75871712:-"; transcript_id "SE:1:75761828-75776554:75776719-75871712:-:alternative1";
1	hq_isoforms.fasta.no5merge.collapsed.gff	exon	75871712	75871812	.	-	.	gene_id "SE:1:75761828-75776554:75776719-75871712:-"; transcript_id "SE:1:75761828-75776554:75776719-75871712:-:alternative1";
1	hq_isoforms.fasta.no5merge.collapsed.gff	exon	76284484	76284584	.	-	.	gene_id "SE:1:76284584-76285625:76285698-76286988:-"; transcript_id "SE:1:76284584-76285625:76285698-76286988:-:alternative2";
1	hq_isoforms.fasta.no5merge.collapsed.gff	exon	76286988	76287088	.	-	.	gene_id "SE:1:76284584-76285625:76285698-76286988:-"; transcript_id "SE:1:76284584-76285625:76285698-76286988:-:alternative2";
1	hq_isoforms.fasta.no5merge.collapsed.gff	exon	76284484	76284584	.	-	.	gene_id "SE:1:76284584-76285625:76285698-76286988:-"; transcript_id "SE:1:76284584-76285625:76285698-76286988:-:alternative1";
1	hq_isoforms.fasta.no5merge.collapsed.gff	exon	76285625	76285698	.	-	.	gene_id "SE:1:76284584-76285625:76285698-76286988:-"; transcript_id "SE:1:76284584-76285625:76285698-76286988:-:alternative1";
1	hq_isoforms.fasta.no5merge.collapsed.gff	exon	76286988	76287088	.	-	.	gene_id "SE:1:76284584-76285625:76285698-76286988:-"; transcript_id "SE:1:76284584-76285625:76285698-76286988:-:alternative1";
1	hq_isoforms.fasta.no5merge.collapsed.gff	exon	78617347	78617447	.	-	.	gene_id "SE:1:78617447-78617964:78618016-78618915:-"; transcript_id "SE:1:78617447-78617964:78618016-78618915:-:alternative2";
1	hq_isoforms.fasta.no5merge.collapsed.gff	exon	78618915	78619015	.	-	.	gene_id "SE:1:78617447-78617964:78618016-78618915:-"; transcript_id "SE:1:78617447-78617964:78618016-78618915:-:alternative2";
1	hq_isoforms.fasta.no5merge.collapsed.gff	exon	78617347	78617447	.	-	.	gene_id "SE:1:78617447-78617964:78618016-78618915:-"; transcript_id "SE:1:78617447-78617964:78618016-78618915:-:alternative1";
1	hq_isoforms.fasta.no5merge.collapsed.gff	exon	78617964	78618016	.	-	.	gene_id "SE:1:78617447-78617964:78618016-78618915:-"; transcript_id "SE:1:78617447-78617964:78618016-78618915:-:alternative1";
1	hq_isoforms.fasta.no5merge.collapsed.gff	exon	78618915	78619015	.	-	.	gene_id "SE:1:78617447-78617964:78618016-78618915:-"; transcript_id "SE:1:78617447-78617964:78618016-78618915:-:alternative1";
1	hq_isoforms.fasta.no5merge.collapsed.gff	exon	77577856	77577956	.	-	.	gene_id "SE:1:77577956-77582858:77582971-77592596:-"; transcript_id "SE:1:77577956-77582858:77582971-77592596:-:alternative2";
1	hq_isoforms.fasta.no5merge.collapsed.gff	exon	77592596	77592696	.	-	.	gene_id "SE:1:77577956-77582858:77582971-77592596:-"; transcript_id "SE:1:77577956-77582858:77582971-77592596:-:alternative2";
1	hq_isoforms.fasta.no5merge.collapsed.gff	exon	77577856	77577956	.	-	.	gene_id "SE:1:77577956-77582858:77582971-77592596:-"; transcript_id "SE:1:77577956-77582858:77582971-77592596:-:alternative1";
1	hq_isoforms.fasta.no5merge.collapsed.gff	exon	77582858	77582971	.	-	.	gene_id "SE:1:77577956-77582858:77582971-77592596:-"; transcript_id "SE:1:77577956-77582858:77582971-77592596:-:alternative1";
1	hq_isoforms.fasta.no5merge.collapsed.gff	exon	77592596	77592696	.	-	.	gene_id "SE:1:77577956-77582858:77582971-77592596:-"; transcript_id "SE:1:77577956-77582858:77582971-77592596:-:alternative1";
1	hq_isoforms.fasta.no5merge.collapsed.gff	exon	78032414	78032514	.	-	.	gene_id "SE:1:78032514-78033129:78033235-78034623:-"; transcript_id "SE:1:78032514-78033129:78033235-78034623:-:alternative2";
1	hq_isoforms.fasta.no5merge.collapsed.gff	exon	78034623	78034723	.	-	.	gene_id "SE:1:78032514-78033129:78033235-78034623:-"; transcript_id "SE:1:78032514-78033129:78033235-78034623:-:alternative2";
1	hq_isoforms.fasta.no5merge.collapsed.gff	exon	78032414	78032514	.	-	.	gene_id "SE:1:78032514-78033129:78033235-78034623:-"; transcript_id "SE:1:78032514-78033129:78033235-78034623:-:alternative1";
1	hq_isoforms.fasta.no5merge.collapsed.gff	exon	78033129	78033235	.	-	.	gene_id "SE:1:78032514-78033129:78033235-78034623:-"; transcript_id "SE:1:78032514-78033129:78033235-78034623:-:alternative1";
1	hq_isoforms.fasta.no5merge.collapsed.gff	exon	78034623	78034723	.	-	.	gene_id "SE:1:78032514-78033129:78033235-78034623:-"; transcript_id "SE:1:78032514-78033129:78033235-78034623:-:alternative1";
1	hq_isoforms.fasta.no5merge.collapsed.gff	exon	78034644	78034744	.	-	.	gene_id "SE:1:78034744-78034838:78034937-78037877:-"; transcript_id "SE:1:78034744-78034838:78034937-78037877:-:alternative2";
1	hq_isoforms.fasta.no5merge.collapsed.gff	exon	78037877	78037977	.	-	.	gene_id "SE:1:78034744-78034838:78034937-78037877:-"; transcript_id "SE:1:78034744-78034838:78034937-78037877:-:alternative2";
1	hq_isoforms.fasta.no5merge.collapsed.gff	exon	78034644	78034744	.	-	.	gene_id "SE:1:78034744-78034838:78034937-78037877:-"; transcript_id "SE:1:78034744-78034838:78034937-78037877:-:alternative1";
1	hq_isoforms.fasta.no5merge.collapsed.gff	exon	78034838	78034937	.	-	.	gene_id "SE:1:78034744-78034838:78034937-78037877:-"; transcript_id "SE:1:78034744-78034838:78034937-78037877:-:alternative1";
1	hq_isoforms.fasta.no5merge.collapsed.gff	exon	78037877	78037977	.	-	.	gene_id "SE:1:78034744-78034838:78034937-78037877:-"; transcript_id "SE:1:78034744-78034838:78034937-78037877:-:alternative1";
1	hq_isoforms.fasta.no5merge.collapsed.gff	exon	78037958	78038058	.	-	.	gene_id "SE:1:78038058-78039275:78039420-78039704:-"; transcript_id "SE:1:78038058-78039275:78039420-78039704:-:alternative2";
1	hq_isoforms.fasta.no5merge.collapsed.gff	exon	78039704	78039804	.	-	.	gene_id "SE:1:78038058-78039275:78039420-78039704:-"; transcript_id "SE:1:78038058-78039275:78039420-78039704:-:alternative2";
1	hq_isoforms.fasta.no5merge.collapsed.gff	exon	78037958	78038058	.	-	.	gene_id "SE:1:78038058-78039275:78039420-78039704:-"; transcript_id "SE:1:78038058-78039275:78039420-78039704:-:alternative1";
1	hq_isoforms.fasta.no5merge.collapsed.gff	exon	78039275	78039420	.	-	.	gene_id "SE:1:78038058-78039275:78039420-78039704:-"; transcript_id "SE:1:78038058-78039275:78039420-78039704:-:alternative1";
1	hq_isoforms.fasta.no5merge.collapsed.gff	exon	78039704	78039804	.	-	.	gene_id "SE:1:78038058-78039275:78039420-78039704:-"; transcript_id "SE:1:78038058-78039275:78039420-78039704:-:alternative1";
1	hq_isoforms.fasta.no5merge.collapsed.gff	exon	78654018	78654118	.	-	.	gene_id "SE:1:78654118-78655251:78655406-78656335:-"; transcript_id "SE:1:78654118-78655251:78655406-78656335:-:alternative2";
1	hq_isoforms.fasta.no5merge.collapsed.gff	exon	78656335	78656435	.	-	.	gene_id "SE:1:78654118-78655251:78655406-78656335:-"; transcript_id "SE:1:78654118-78655251:78655406-78656335:-:alternative2";
1	hq_isoforms.fasta.no5merge.collapsed.gff	exon	78654018	78654118	.	-	.	gene_id "SE:1:78654118-78655251:78655406-78656335:-"; transcript_id "SE:1:78654118-78655251:78655406-78656335:-:alternative1";
1	hq_isoforms.fasta.no5merge.collapsed.gff	exon	78655251	78655406	.	-	.	gene_id "SE:1:78654118-78655251:78655406-78656335:-"; transcript_id "SE:1:78654118-78655251:78655406-78656335:-:alternative1";
1	hq_isoforms.fasta.no5merge.collapsed.gff	exon	78656335	78656435	.	-	.	gene_id "SE:1:78654118-78655251:78655406-78656335:-"; transcript_id "SE:1:78654118-78655251:78655406-78656335:-:alternative1";
1	hq_isoforms.fasta.no5merge.collapsed.gff	exon	79180054	79180154	.	-	.	gene_id "SE:1:79180154-79185664:79185920-79191384:-"; transcript_id "SE:1:79180154-79185664:79185920-79191384:-:alternative2";
1	hq_isoforms.fasta.no5merge.collapsed.gff	exon	79191384	79191484	.	-	.	gene_id "SE:1:79180154-79185664:79185920-79191384:-"; transcript_id "SE:1:79180154-79185664:79185920-79191384:-:alternative2";
1	hq_isoforms.fasta.no5merge.collapsed.gff	exon	79180054	79180154	.	-	.	gene_id "SE:1:79180154-79185664:79185920-79191384:-"; transcript_id "SE:1:79180154-79185664:79185920-79191384:-:alternative1";
1	hq_isoforms.fasta.no5merge.collapsed.gff	exon	79185664	79185920	.	-	.	gene_id "SE:1:79180154-79185664:79185920-79191384:-"; transcript_id "SE:1:79180154-79185664:79185920-79191384:-:alternative1";
1	hq_isoforms.fasta.no5merge.collapsed.gff	exon	79191384	79191484	.	-	.	gene_id "SE:1:79180154-79185664:79185920-79191384:-"; transcript_id "SE:1:79180154-79185664:79185920-79191384:-:alternative1";
1	hq_isoforms.fasta.no5merge.collapsed.gff	exon	80061741	80061841	.	-	.	gene_id "SE:1:80061841-80065360:80065421-80065533:-"; transcript_id "SE:1:80061841-80065360:80065421-80065533:-:alternative2";
1	hq_isoforms.fasta.no5merge.collapsed.gff	exon	80065533	80065633	.	-	.	gene_id "SE:1:80061841-80065360:80065421-80065533:-"; transcript_id "SE:1:80061841-80065360:80065421-80065533:-:alternative2";
1	hq_isoforms.fasta.no5merge.collapsed.gff	exon	80061741	80061841	.	-	.	gene_id "SE:1:80061841-80065360:80065421-80065533:-"; transcript_id "SE:1:80061841-80065360:80065421-80065533:-:alternative1";
1	hq_isoforms.fasta.no5merge.collapsed.gff	exon	80065360	80065421	.	-	.	gene_id "SE:1:80061841-80065360:80065421-80065533:-"; transcript_id "SE:1:80061841-80065360:80065421-80065533:-:alternative1";
1	hq_isoforms.fasta.no5merge.collapsed.gff	exon	80065533	80065633	.	-	.	gene_id "SE:1:80061841-80065360:80065421-80065533:-"; transcript_id "SE:1:80061841-80065360:80065421-80065533:-:alternative1";
1	hq_isoforms.fasta.no5merge.collapsed.gff	exon	81229875	81229975	.	-	.	gene_id "SE:1:81229975-81235143:81235304-81238612:-"; transcript_id "SE:1:81229975-81235143:81235304-81238612:-:alternative2";
1	hq_isoforms.fasta.no5merge.collapsed.gff	exon	81238612	81238712	.	-	.	gene_id "SE:1:81229975-81235143:81235304-81238612:-"; transcript_id "SE:1:81229975-81235143:81235304-81238612:-:alternative2";
1	hq_isoforms.fasta.no5merge.collapsed.gff	exon	81229875	81229975	.	-	.	gene_id "SE:1:81229975-81235143:81235304-81238612:-"; transcript_id "SE:1:81229975-81235143:81235304-81238612:-:alternative1";
1	hq_isoforms.fasta.no5merge.collapsed.gff	exon	81235143	81235304	.	-	.	gene_id "SE:1:81229975-81235143:81235304-81238612:-"; transcript_id "SE:1:81229975-81235143:81235304-81238612:-:alternative1";
1	hq_isoforms.fasta.no5merge.collapsed.gff	exon	81238612	81238712	.	-	.	gene_id "SE:1:81229975-81235143:81235304-81238612:-"; transcript_id "SE:1:81229975-81235143:81235304-81238612:-:alternative1";
1	hq_isoforms.fasta.no5merge.collapsed.gff	exon	82353477	82353577	.	-	.	gene_id "SE:1:82353577-82354450:82354586-82354811:-"; transcript_id "SE:1:82353577-82354450:82354586-82354811:-:alternative2";
1	hq_isoforms.fasta.no5merge.collapsed.gff	exon	82354811	82354911	.	-	.	gene_id "SE:1:82353577-82354450:82354586-82354811:-"; transcript_id "SE:1:82353577-82354450:82354586-82354811:-:alternative2";
1	hq_isoforms.fasta.no5merge.collapsed.gff	exon	82353477	82353577	.	-	.	gene_id "SE:1:82353577-82354450:82354586-82354811:-"; transcript_id "SE:1:82353577-82354450:82354586-82354811:-:alternative1";
1	hq_isoforms.fasta.no5merge.collapsed.gff	exon	82354450	82354586	.	-	.	gene_id "SE:1:82353577-82354450:82354586-82354811:-"; transcript_id "SE:1:82353577-82354450:82354586-82354811:-:alternative1";
1	hq_isoforms.fasta.no5merge.collapsed.gff	exon	82354811	82354911	.	-	.	gene_id "SE:1:82353577-82354450:82354586-82354811:-"; transcript_id "SE:1:82353577-82354450:82354586-82354811:-:alternative1";
1	hq_isoforms.fasta.no5merge.collapsed.gff	exon	82478869	82478969	.	-	.	gene_id "SE:1:82478969-82492410:82492580-82512594:-"; transcript_id "SE:1:82478969-82492410:82492580-82512594:-:alternative2";
1	hq_isoforms.fasta.no5merge.collapsed.gff	exon	82512594	82512694	.	-	.	gene_id "SE:1:82478969-82492410:82492580-82512594:-"; transcript_id "SE:1:82478969-82492410:82492580-82512594:-:alternative2";
1	hq_isoforms.fasta.no5merge.collapsed.gff	exon	82478869	82478969	.	-	.	gene_id "SE:1:82478969-82492410:82492580-82512594:-"; transcript_id "SE:1:82478969-82492410:82492580-82512594:-:alternative1";
1	hq_isoforms.fasta.no5merge.collapsed.gff	exon	82492410	82492580	.	-	.	gene_id "SE:1:82478969-82492410:82492580-82512594:-"; transcript_id "SE:1:82478969-82492410:82492580-82512594:-:alternative1";
1	hq_isoforms.fasta.no5merge.collapsed.gff	exon	82512594	82512694	.	-	.	gene_id "SE:1:82478969-82492410:82492580-82512594:-"; transcript_id "SE:1:82478969-82492410:82492580-82512594:-:alternative1";
1	hq_isoforms.fasta.no5merge.collapsed.gff	exon	82512559	82512659	.	-	.	gene_id "SE:1:82512659-82521245:82521316-82522978:-"; transcript_id "SE:1:82512659-82521245:82521316-82522978:-:alternative2";
1	hq_isoforms.fasta.no5merge.collapsed.gff	exon	82522978	82523078	.	-	.	gene_id "SE:1:82512659-82521245:82521316-82522978:-"; transcript_id "SE:1:82512659-82521245:82521316-82522978:-:alternative2";
1	hq_isoforms.fasta.no5merge.collapsed.gff	exon	82512559	82512659	.	-	.	gene_id "SE:1:82512659-82521245:82521316-82522978:-"; transcript_id "SE:1:82512659-82521245:82521316-82522978:-:alternative1";
1	hq_isoforms.fasta.no5merge.collapsed.gff	exon	82521245	82521316	.	-	.	gene_id "SE:1:82512659-82521245:82521316-82522978:-"; transcript_id "SE:1:82512659-82521245:82521316-82522978:-:alternative1";
1	hq_isoforms.fasta.no5merge.collapsed.gff	exon	82522978	82523078	.	-	.	gene_id "SE:1:82512659-82521245:82521316-82522978:-"; transcript_id "SE:1:82512659-82521245:82521316-82522978:-:alternative1";
1	hq_isoforms.fasta.no5merge.collapsed.gff	exon	83596100	83596200	.	-	.	gene_id "SE:1:83596200-83596411:83596559-83616406:-"; transcript_id "SE:1:83596200-83596411:83596559-83616406:-:alternative2";
1	hq_isoforms.fasta.no5merge.collapsed.gff	exon	83616406	83616506	.	-	.	gene_id "SE:1:83596200-83596411:83596559-83616406:-"; transcript_id "SE:1:83596200-83596411:83596559-83616406:-:alternative2";
1	hq_isoforms.fasta.no5merge.collapsed.gff	exon	83596100	83596200	.	-	.	gene_id "SE:1:83596200-83596411:83596559-83616406:-"; transcript_id "SE:1:83596200-83596411:83596559-83616406:-:alternative1";
1	hq_isoforms.fasta.no5merge.collapsed.gff	exon	83596411	83596559	.	-	.	gene_id "SE:1:83596200-83596411:83596559-83616406:-"; transcript_id "SE:1:83596200-83596411:83596559-83616406:-:alternative1";
1	hq_isoforms.fasta.no5merge.collapsed.gff	exon	83616406	83616506	.	-	.	gene_id "SE:1:83596200-83596411:83596559-83616406:-"; transcript_id "SE:1:83596200-83596411:83596559-83616406:-:alternative1";
1	hq_isoforms.fasta.no5merge.collapsed.gff	exon	83737100	83737200	.	-	.	gene_id "SE:1:83737200-83738767:83738967-83739507:-"; transcript_id "SE:1:83737200-83738767:83738967-83739507:-:alternative2";
1	hq_isoforms.fasta.no5merge.collapsed.gff	exon	83739507	83739607	.	-	.	gene_id "SE:1:83737200-83738767:83738967-83739507:-"; transcript_id "SE:1:83737200-83738767:83738967-83739507:-:alternative2";
1	hq_isoforms.fasta.no5merge.collapsed.gff	exon	83737100	83737200	.	-	.	gene_id "SE:1:83737200-83738767:83738967-83739507:-"; transcript_id "SE:1:83737200-83738767:83738967-83739507:-:alternative1";
1	hq_isoforms.fasta.no5merge.collapsed.gff	exon	83738767	83738967	.	-	.	gene_id "SE:1:83737200-83738767:83738967-83739507:-"; transcript_id "SE:1:83737200-83738767:83738967-83739507:-:alternative1";
1	hq_isoforms.fasta.no5merge.collapsed.gff	exon	83739507	83739607	.	-	.	gene_id "SE:1:83737200-83738767:83738967-83739507:-"; transcript_id "SE:1:83737200-83738767:83738967-83739507:-:alternative1";
1	hq_isoforms.fasta.no5merge.collapsed.gff	exon	85839206	85839306	.	-	.	gene_id "SE:1:85839306-85841500:85841555-85841658:-"; transcript_id "SE:1:85839306-85841500:85841555-85841658:-:alternative2";
1	hq_isoforms.fasta.no5merge.collapsed.gff	exon	85841658	85841758	.	-	.	gene_id "SE:1:85839306-85841500:85841555-85841658:-"; transcript_id "SE:1:85839306-85841500:85841555-85841658:-:alternative2";
1	hq_isoforms.fasta.no5merge.collapsed.gff	exon	85839206	85839306	.	-	.	gene_id "SE:1:85839306-85841500:85841555-85841658:-"; transcript_id "SE:1:85839306-85841500:85841555-85841658:-:alternative1";
1	hq_isoforms.fasta.no5merge.collapsed.gff	exon	85841500	85841555	.	-	.	gene_id "SE:1:85839306-85841500:85841555-85841658:-"; transcript_id "SE:1:85839306-85841500:85841555-85841658:-:alternative1";
1	hq_isoforms.fasta.no5merge.collapsed.gff	exon	85841658	85841758	.	-	.	gene_id "SE:1:85839306-85841500:85841555-85841658:-"; transcript_id "SE:1:85839306-85841500:85841555-85841658:-:alternative1";
1	hq_isoforms.fasta.no5merge.collapsed.gff	exon	86843454	86843554	.	-	.	gene_id "SE:1:86843554-86843676:86843711-86845693:-"; transcript_id "SE:1:86843554-86843676:86843711-86845693:-:alternative2";
1	hq_isoforms.fasta.no5merge.collapsed.gff	exon	86845693	86845793	.	-	.	gene_id "SE:1:86843554-86843676:86843711-86845693:-"; transcript_id "SE:1:86843554-86843676:86843711-86845693:-:alternative2";
1	hq_isoforms.fasta.no5merge.collapsed.gff	exon	86843454	86843554	.	-	.	gene_id "SE:1:86843554-86843676:86843711-86845693:-"; transcript_id "SE:1:86843554-86843676:86843711-86845693:-:alternative1";
1	hq_isoforms.fasta.no5merge.collapsed.gff	exon	86843676	86843711	.	-	.	gene_id "SE:1:86843554-86843676:86843711-86845693:-"; transcript_id "SE:1:86843554-86843676:86843711-86845693:-:alternative1";
1	hq_isoforms.fasta.no5merge.collapsed.gff	exon	86845693	86845793	.	-	.	gene_id "SE:1:86843554-86843676:86843711-86845693:-"; transcript_id "SE:1:86843554-86843676:86843711-86845693:-:alternative1";
1	hq_isoforms.fasta.no5merge.collapsed.gff	exon	87333620	87333720	.	-	.	gene_id "SE:1:87333720-87334547:87336185-87338891:-"; transcript_id "SE:1:87333720-87334547:87336185-87338891:-:alternative2";
1	hq_isoforms.fasta.no5merge.collapsed.gff	exon	87338891	87338991	.	-	.	gene_id "SE:1:87333720-87334547:87336185-87338891:-"; transcript_id "SE:1:87333720-87334547:87336185-87338891:-:alternative2";
1	hq_isoforms.fasta.no5merge.collapsed.gff	exon	87333620	87333720	.	-	.	gene_id "SE:1:87333720-87334547:87336185-87338891:-"; transcript_id "SE:1:87333720-87334547:87336185-87338891:-:alternative1";
1	hq_isoforms.fasta.no5merge.collapsed.gff	exon	87334547	87336185	.	-	.	gene_id "SE:1:87333720-87334547:87336185-87338891:-"; transcript_id "SE:1:87333720-87334547:87336185-87338891:-:alternative1";
1	hq_isoforms.fasta.no5merge.collapsed.gff	exon	87338891	87338991	.	-	.	gene_id "SE:1:87333720-87334547:87336185-87338891:-"; transcript_id "SE:1:87333720-87334547:87336185-87338891:-:alternative1";
1	hq_isoforms.fasta.no5merge.collapsed.gff	exon	87987428	87987528	.	-	.	gene_id "SE:1:87987528-87987777:87987838-87988513:-"; transcript_id "SE:1:87987528-87987777:87987838-87988513:-:alternative2";
1	hq_isoforms.fasta.no5merge.collapsed.gff	exon	87988513	87988613	.	-	.	gene_id "SE:1:87987528-87987777:87987838-87988513:-"; transcript_id "SE:1:87987528-87987777:87987838-87988513:-:alternative2";
1	hq_isoforms.fasta.no5merge.collapsed.gff	exon	87987428	87987528	.	-	.	gene_id "SE:1:87987528-87987777:87987838-87988513:-"; transcript_id "SE:1:87987528-87987777:87987838-87988513:-:alternative1";
1	hq_isoforms.fasta.no5merge.collapsed.gff	exon	87987777	87987838	.	-	.	gene_id "SE:1:87987528-87987777:87987838-87988513:-"; transcript_id "SE:1:87987528-87987777:87987838-87988513:-:alternative1";
1	hq_isoforms.fasta.no5merge.collapsed.gff	exon	87988513	87988613	.	-	.	gene_id "SE:1:87987528-87987777:87987838-87988513:-"; transcript_id "SE:1:87987528-87987777:87987838-87988513:-:alternative1";
1	hq_isoforms.fasta.no5merge.collapsed.gff	exon	87754262	87754362	.	-	.	gene_id "SE:1:87754362-87757288:87757469-87766877:-"; transcript_id "SE:1:87754362-87757288:87757469-87766877:-:alternative2";
1	hq_isoforms.fasta.no5merge.collapsed.gff	exon	87766877	87766977	.	-	.	gene_id "SE:1:87754362-87757288:87757469-87766877:-"; transcript_id "SE:1:87754362-87757288:87757469-87766877:-:alternative2";
1	hq_isoforms.fasta.no5merge.collapsed.gff	exon	87754262	87754362	.	-	.	gene_id "SE:1:87754362-87757288:87757469-87766877:-"; transcript_id "SE:1:87754362-87757288:87757469-87766877:-:alternative1";
1	hq_isoforms.fasta.no5merge.collapsed.gff	exon	87757288	87757469	.	-	.	gene_id "SE:1:87754362-87757288:87757469-87766877:-"; transcript_id "SE:1:87754362-87757288:87757469-87766877:-:alternative1";
1	hq_isoforms.fasta.no5merge.collapsed.gff	exon	87766877	87766977	.	-	.	gene_id "SE:1:87754362-87757288:87757469-87766877:-"; transcript_id "SE:1:87754362-87757288:87757469-87766877:-:alternative1";
1	hq_isoforms.fasta.no5merge.collapsed.gff	exon	88080321	88080421	.	-	.	gene_id "SE:1:88080421-88081973:88082170-88087673:-"; transcript_id "SE:1:88080421-88081973:88082170-88087673:-:alternative2";
1	hq_isoforms.fasta.no5merge.collapsed.gff	exon	88087673	88087773	.	-	.	gene_id "SE:1:88080421-88081973:88082170-88087673:-"; transcript_id "SE:1:88080421-88081973:88082170-88087673:-:alternative2";
1	hq_isoforms.fasta.no5merge.collapsed.gff	exon	88080321	88080421	.	-	.	gene_id "SE:1:88080421-88081973:88082170-88087673:-"; transcript_id "SE:1:88080421-88081973:88082170-88087673:-:alternative1";
1	hq_isoforms.fasta.no5merge.collapsed.gff	exon	88081973	88082170	.	-	.	gene_id "SE:1:88080421-88081973:88082170-88087673:-"; transcript_id "SE:1:88080421-88081973:88082170-88087673:-:alternative1";
1	hq_isoforms.fasta.no5merge.collapsed.gff	exon	88087673	88087773	.	-	.	gene_id "SE:1:88080421-88081973:88082170-88087673:-"; transcript_id "SE:1:88080421-88081973:88082170-88087673:-:alternative1";
1	hq_isoforms.fasta.no5merge.collapsed.gff	exon	88076159	88076259	.	-	.	gene_id "SE:1:88076259-88080224:88080421-88087673:-"; transcript_id "SE:1:88076259-88080224:88080421-88087673:-:alternative2";
1	hq_isoforms.fasta.no5merge.collapsed.gff	exon	88087673	88087773	.	-	.	gene_id "SE:1:88076259-88080224:88080421-88087673:-"; transcript_id "SE:1:88076259-88080224:88080421-88087673:-:alternative2";
1	hq_isoforms.fasta.no5merge.collapsed.gff	exon	88076159	88076259	.	-	.	gene_id "SE:1:88076259-88080224:88080421-88087673:-"; transcript_id "SE:1:88076259-88080224:88080421-88087673:-:alternative1";
1	hq_isoforms.fasta.no5merge.collapsed.gff	exon	88080224	88080421	.	-	.	gene_id "SE:1:88076259-88080224:88080421-88087673:-"; transcript_id "SE:1:88076259-88080224:88080421-88087673:-:alternative1";
1	hq_isoforms.fasta.no5merge.collapsed.gff	exon	88087673	88087773	.	-	.	gene_id "SE:1:88076259-88080224:88080421-88087673:-"; transcript_id "SE:1:88076259-88080224:88080421-88087673:-:alternative1";
1	hq_isoforms.fasta.no5merge.collapsed.gff	exon	88087667	88087767	.	-	.	gene_id "SE:1:88087767-88089988:88090095-88092525:-"; transcript_id "SE:1:88087767-88089988:88090095-88092525:-:alternative2";
1	hq_isoforms.fasta.no5merge.collapsed.gff	exon	88092525	88092625	.	-	.	gene_id "SE:1:88087767-88089988:88090095-88092525:-"; transcript_id "SE:1:88087767-88089988:88090095-88092525:-:alternative2";
1	hq_isoforms.fasta.no5merge.collapsed.gff	exon	88087667	88087767	.	-	.	gene_id "SE:1:88087767-88089988:88090095-88092525:-"; transcript_id "SE:1:88087767-88089988:88090095-88092525:-:alternative1";
1	hq_isoforms.fasta.no5merge.collapsed.gff	exon	88089988	88090095	.	-	.	gene_id "SE:1:88087767-88089988:88090095-88092525:-"; transcript_id "SE:1:88087767-88089988:88090095-88092525:-:alternative1";
1	hq_isoforms.fasta.no5merge.collapsed.gff	exon	88092525	88092625	.	-	.	gene_id "SE:1:88087767-88089988:88090095-88092525:-"; transcript_id "SE:1:88087767-88089988:88090095-88092525:-:alternative1";
1	hq_isoforms.fasta.no5merge.collapsed.gff	exon	89429292	89429392	.	-	.	gene_id "SE:1:89429392-89430737:89430868-89430967:-"; transcript_id "SE:1:89429392-89430737:89430868-89430967:-:alternative2";
1	hq_isoforms.fasta.no5merge.collapsed.gff	exon	89430967	89431067	.	-	.	gene_id "SE:1:89429392-89430737:89430868-89430967:-"; transcript_id "SE:1:89429392-89430737:89430868-89430967:-:alternative2";
1	hq_isoforms.fasta.no5merge.collapsed.gff	exon	89429292	89429392	.	-	.	gene_id "SE:1:89429392-89430737:89430868-89430967:-"; transcript_id "SE:1:89429392-89430737:89430868-89430967:-:alternative1";
1	hq_isoforms.fasta.no5merge.collapsed.gff	exon	89430737	89430868	.	-	.	gene_id "SE:1:89429392-89430737:89430868-89430967:-"; transcript_id "SE:1:89429392-89430737:89430868-89430967:-:alternative1";
1	hq_isoforms.fasta.no5merge.collapsed.gff	exon	89430967	89431067	.	-	.	gene_id "SE:1:89429392-89430737:89430868-89430967:-"; transcript_id "SE:1:89429392-89430737:89430868-89430967:-:alternative1";
1	hq_isoforms.fasta.no5merge.collapsed.gff	exon	90166866	90166966	.	-	.	gene_id "SE:1:90166966-90167634:90170116-90172352:-"; transcript_id "SE:1:90166966-90167634:90170116-90172352:-:alternative2";
1	hq_isoforms.fasta.no5merge.collapsed.gff	exon	90172352	90172452	.	-	.	gene_id "SE:1:90166966-90167634:90170116-90172352:-"; transcript_id "SE:1:90166966-90167634:90170116-90172352:-:alternative2";
1	hq_isoforms.fasta.no5merge.collapsed.gff	exon	90166866	90166966	.	-	.	gene_id "SE:1:90166966-90167634:90170116-90172352:-"; transcript_id "SE:1:90166966-90167634:90170116-90172352:-:alternative1";
1	hq_isoforms.fasta.no5merge.collapsed.gff	exon	90167634	90170116	.	-	.	gene_id "SE:1:90166966-90167634:90170116-90172352:-"; transcript_id "SE:1:90166966-90167634:90170116-90172352:-:alternative1";
1	hq_isoforms.fasta.no5merge.collapsed.gff	exon	90172352	90172452	.	-	.	gene_id "SE:1:90166966-90167634:90170116-90172352:-"; transcript_id "SE:1:90166966-90167634:90170116-90172352:-:alternative1";
1	hq_isoforms.fasta.no5merge.collapsed.gff	exon	90180418	90180518	.	-	.	gene_id "SE:1:90180518-90182630:90182672-90184144:-"; transcript_id "SE:1:90180518-90182630:90182672-90184144:-:alternative2";
1	hq_isoforms.fasta.no5merge.collapsed.gff	exon	90184144	90184244	.	-	.	gene_id "SE:1:90180518-90182630:90182672-90184144:-"; transcript_id "SE:1:90180518-90182630:90182672-90184144:-:alternative2";
1	hq_isoforms.fasta.no5merge.collapsed.gff	exon	90180418	90180518	.	-	.	gene_id "SE:1:90180518-90182630:90182672-90184144:-"; transcript_id "SE:1:90180518-90182630:90182672-90184144:-:alternative1";
1	hq_isoforms.fasta.no5merge.collapsed.gff	exon	90182630	90182672	.	-	.	gene_id "SE:1:90180518-90182630:90182672-90184144:-"; transcript_id "SE:1:90180518-90182630:90182672-90184144:-:alternative1";
1	hq_isoforms.fasta.no5merge.collapsed.gff	exon	90184144	90184244	.	-	.	gene_id "SE:1:90180518-90182630:90182672-90184144:-"; transcript_id "SE:1:90180518-90182630:90182672-90184144:-:alternative1";
1	hq_isoforms.fasta.no5merge.collapsed.gff	exon	90173652	90173752	.	-	.	gene_id "SE:1:90173752-90174262:90174393-90175313:-"; transcript_id "SE:1:90173752-90174262:90174393-90175313:-:alternative2";
1	hq_isoforms.fasta.no5merge.collapsed.gff	exon	90175313	90175413	.	-	.	gene_id "SE:1:90173752-90174262:90174393-90175313:-"; transcript_id "SE:1:90173752-90174262:90174393-90175313:-:alternative2";
1	hq_isoforms.fasta.no5merge.collapsed.gff	exon	90173652	90173752	.	-	.	gene_id "SE:1:90173752-90174262:90174393-90175313:-"; transcript_id "SE:1:90173752-90174262:90174393-90175313:-:alternative1";
1	hq_isoforms.fasta.no5merge.collapsed.gff	exon	90174262	90174393	.	-	.	gene_id "SE:1:90173752-90174262:90174393-90175313:-"; transcript_id "SE:1:90173752-90174262:90174393-90175313:-:alternative1";
1	hq_isoforms.fasta.no5merge.collapsed.gff	exon	90175313	90175413	.	-	.	gene_id "SE:1:90173752-90174262:90174393-90175313:-"; transcript_id "SE:1:90173752-90174262:90174393-90175313:-:alternative1";
1	hq_isoforms.fasta.no5merge.collapsed.gff	exon	91541574	91541674	.	-	.	gene_id "SE:1:91541674-91546673:91546741-91547186:-"; transcript_id "SE:1:91541674-91546673:91546741-91547186:-:alternative2";
1	hq_isoforms.fasta.no5merge.collapsed.gff	exon	91547186	91547286	.	-	.	gene_id "SE:1:91541674-91546673:91546741-91547186:-"; transcript_id "SE:1:91541674-91546673:91546741-91547186:-:alternative2";
1	hq_isoforms.fasta.no5merge.collapsed.gff	exon	91541574	91541674	.	-	.	gene_id "SE:1:91541674-91546673:91546741-91547186:-"; transcript_id "SE:1:91541674-91546673:91546741-91547186:-:alternative1";
1	hq_isoforms.fasta.no5merge.collapsed.gff	exon	91546673	91546741	.	-	.	gene_id "SE:1:91541674-91546673:91546741-91547186:-"; transcript_id "SE:1:91541674-91546673:91546741-91547186:-:alternative1";
1	hq_isoforms.fasta.no5merge.collapsed.gff	exon	91547186	91547286	.	-	.	gene_id "SE:1:91541674-91546673:91546741-91547186:-"; transcript_id "SE:1:91541674-91546673:91546741-91547186:-:alternative1";
1	hq_isoforms.fasta.no5merge.collapsed.gff	exon	91921488	91921588	.	-	.	gene_id "SE:1:91921588-91937789:91937901-91989988:-"; transcript_id "SE:1:91921588-91937789:91937901-91989988:-:alternative2";
1	hq_isoforms.fasta.no5merge.collapsed.gff	exon	91989988	91990088	.	-	.	gene_id "SE:1:91921588-91937789:91937901-91989988:-"; transcript_id "SE:1:91921588-91937789:91937901-91989988:-:alternative2";
1	hq_isoforms.fasta.no5merge.collapsed.gff	exon	91921488	91921588	.	-	.	gene_id "SE:1:91921588-91937789:91937901-91989988:-"; transcript_id "SE:1:91921588-91937789:91937901-91989988:-:alternative1";
1	hq_isoforms.fasta.no5merge.collapsed.gff	exon	91937789	91937901	.	-	.	gene_id "SE:1:91921588-91937789:91937901-91989988:-"; transcript_id "SE:1:91921588-91937789:91937901-91989988:-:alternative1";
1	hq_isoforms.fasta.no5merge.collapsed.gff	exon	91989988	91990088	.	-	.	gene_id "SE:1:91921588-91937789:91937901-91989988:-"; transcript_id "SE:1:91921588-91937789:91937901-91989988:-:alternative1";
1	hq_isoforms.fasta.no5merge.collapsed.gff	exon	92646945	92647045	.	-	.	gene_id "SE:1:92647045-92647170:92647288-92647975:-"; transcript_id "SE:1:92647045-92647170:92647288-92647975:-:alternative2";
1	hq_isoforms.fasta.no5merge.collapsed.gff	exon	92647975	92648075	.	-	.	gene_id "SE:1:92647045-92647170:92647288-92647975:-"; transcript_id "SE:1:92647045-92647170:92647288-92647975:-:alternative2";
1	hq_isoforms.fasta.no5merge.collapsed.gff	exon	92646945	92647045	.	-	.	gene_id "SE:1:92647045-92647170:92647288-92647975:-"; transcript_id "SE:1:92647045-92647170:92647288-92647975:-:alternative1";
1	hq_isoforms.fasta.no5merge.collapsed.gff	exon	92647170	92647288	.	-	.	gene_id "SE:1:92647045-92647170:92647288-92647975:-"; transcript_id "SE:1:92647045-92647170:92647288-92647975:-:alternative1";
1	hq_isoforms.fasta.no5merge.collapsed.gff	exon	92647975	92648075	.	-	.	gene_id "SE:1:92647045-92647170:92647288-92647975:-"; transcript_id "SE:1:92647045-92647170:92647288-92647975:-:alternative1";
1	hq_isoforms.fasta.no5merge.collapsed.gff	exon	92678345	92678445	.	-	.	gene_id "SE:1:92678445-92681100:92681228-92691642:-"; transcript_id "SE:1:92678445-92681100:92681228-92691642:-:alternative2";
1	hq_isoforms.fasta.no5merge.collapsed.gff	exon	92691642	92691742	.	-	.	gene_id "SE:1:92678445-92681100:92681228-92691642:-"; transcript_id "SE:1:92678445-92681100:92681228-92691642:-:alternative2";
1	hq_isoforms.fasta.no5merge.collapsed.gff	exon	92678345	92678445	.	-	.	gene_id "SE:1:92678445-92681100:92681228-92691642:-"; transcript_id "SE:1:92678445-92681100:92681228-92691642:-:alternative1";
1	hq_isoforms.fasta.no5merge.collapsed.gff	exon	92681100	92681228	.	-	.	gene_id "SE:1:92678445-92681100:92681228-92691642:-"; transcript_id "SE:1:92678445-92681100:92681228-92691642:-:alternative1";
1	hq_isoforms.fasta.no5merge.collapsed.gff	exon	92691642	92691742	.	-	.	gene_id "SE:1:92678445-92681100:92681228-92691642:-"; transcript_id "SE:1:92678445-92681100:92681228-92691642:-:alternative1";
1	hq_isoforms.fasta.no5merge.collapsed.gff	exon	92704593	92704693	.	-	.	gene_id "SE:1:92704693-92707956:92708062-92715625:-"; transcript_id "SE:1:92704693-92707956:92708062-92715625:-:alternative2";
1	hq_isoforms.fasta.no5merge.collapsed.gff	exon	92715625	92715725	.	-	.	gene_id "SE:1:92704693-92707956:92708062-92715625:-"; transcript_id "SE:1:92704693-92707956:92708062-92715625:-:alternative2";
1	hq_isoforms.fasta.no5merge.collapsed.gff	exon	92704593	92704693	.	-	.	gene_id "SE:1:92704693-92707956:92708062-92715625:-"; transcript_id "SE:1:92704693-92707956:92708062-92715625:-:alternative1";
1	hq_isoforms.fasta.no5merge.collapsed.gff	exon	92707956	92708062	.	-	.	gene_id "SE:1:92704693-92707956:92708062-92715625:-"; transcript_id "SE:1:92704693-92707956:92708062-92715625:-:alternative1";
1	hq_isoforms.fasta.no5merge.collapsed.gff	exon	92715625	92715725	.	-	.	gene_id "SE:1:92704693-92707956:92708062-92715625:-"; transcript_id "SE:1:92704693-92707956:92708062-92715625:-:alternative1";
1	hq_isoforms.fasta.no5merge.collapsed.gff	exon	92672053	92672153	.	-	.	gene_id "SE:1:92672153-92673840:92673983-92676413:-"; transcript_id "SE:1:92672153-92673840:92673983-92676413:-:alternative2";
1	hq_isoforms.fasta.no5merge.collapsed.gff	exon	92676413	92676513	.	-	.	gene_id "SE:1:92672153-92673840:92673983-92676413:-"; transcript_id "SE:1:92672153-92673840:92673983-92676413:-:alternative2";
1	hq_isoforms.fasta.no5merge.collapsed.gff	exon	92672053	92672153	.	-	.	gene_id "SE:1:92672153-92673840:92673983-92676413:-"; transcript_id "SE:1:92672153-92673840:92673983-92676413:-:alternative1";
1	hq_isoforms.fasta.no5merge.collapsed.gff	exon	92673840	92673983	.	-	.	gene_id "SE:1:92672153-92673840:92673983-92676413:-"; transcript_id "SE:1:92672153-92673840:92673983-92676413:-:alternative1";
1	hq_isoforms.fasta.no5merge.collapsed.gff	exon	92676413	92676513	.	-	.	gene_id "SE:1:92672153-92673840:92673983-92676413:-"; transcript_id "SE:1:92672153-92673840:92673983-92676413:-:alternative1";
1	hq_isoforms.fasta.no5merge.collapsed.gff	exon	93062182	93062282	.	-	.	gene_id "SE:1:93062282-93081188:93081300-93087696:-"; transcript_id "SE:1:93062282-93081188:93081300-93087696:-:alternative2";
1	hq_isoforms.fasta.no5merge.collapsed.gff	exon	93087696	93087796	.	-	.	gene_id "SE:1:93062282-93081188:93081300-93087696:-"; transcript_id "SE:1:93062282-93081188:93081300-93087696:-:alternative2";
1	hq_isoforms.fasta.no5merge.collapsed.gff	exon	93062182	93062282	.	-	.	gene_id "SE:1:93062282-93081188:93081300-93087696:-"; transcript_id "SE:1:93062282-93081188:93081300-93087696:-:alternative1";
1	hq_isoforms.fasta.no5merge.collapsed.gff	exon	93081188	93081300	.	-	.	gene_id "SE:1:93062282-93081188:93081300-93087696:-"; transcript_id "SE:1:93062282-93081188:93081300-93087696:-:alternative1";
1	hq_isoforms.fasta.no5merge.collapsed.gff	exon	93087696	93087796	.	-	.	gene_id "SE:1:93062282-93081188:93081300-93087696:-"; transcript_id "SE:1:93062282-93081188:93081300-93087696:-:alternative1";
1	hq_isoforms.fasta.no5merge.collapsed.gff	exon	94171883	94171983	.	-	.	gene_id "SE:1:94171983-94172123:94172220-94174413:-"; transcript_id "SE:1:94171983-94172123:94172220-94174413:-:alternative2";
1	hq_isoforms.fasta.no5merge.collapsed.gff	exon	94174413	94174513	.	-	.	gene_id "SE:1:94171983-94172123:94172220-94174413:-"; transcript_id "SE:1:94171983-94172123:94172220-94174413:-:alternative2";
1	hq_isoforms.fasta.no5merge.collapsed.gff	exon	94171883	94171983	.	-	.	gene_id "SE:1:94171983-94172123:94172220-94174413:-"; transcript_id "SE:1:94171983-94172123:94172220-94174413:-:alternative1";
1	hq_isoforms.fasta.no5merge.collapsed.gff	exon	94172123	94172220	.	-	.	gene_id "SE:1:94171983-94172123:94172220-94174413:-"; transcript_id "SE:1:94171983-94172123:94172220-94174413:-:alternative1";
1	hq_isoforms.fasta.no5merge.collapsed.gff	exon	94174413	94174513	.	-	.	gene_id "SE:1:94171983-94172123:94172220-94174413:-"; transcript_id "SE:1:94171983-94172123:94172220-94174413:-:alternative1";
1	hq_isoforms.fasta.no5merge.collapsed.gff	exon	94297458	94297558	.	-	.	gene_id "SE:1:94297558-94298554:94298667-94303079:-"; transcript_id "SE:1:94297558-94298554:94298667-94303079:-:alternative2";
1	hq_isoforms.fasta.no5merge.collapsed.gff	exon	94303079	94303179	.	-	.	gene_id "SE:1:94297558-94298554:94298667-94303079:-"; transcript_id "SE:1:94297558-94298554:94298667-94303079:-:alternative2";
1	hq_isoforms.fasta.no5merge.collapsed.gff	exon	94297458	94297558	.	-	.	gene_id "SE:1:94297558-94298554:94298667-94303079:-"; transcript_id "SE:1:94297558-94298554:94298667-94303079:-:alternative1";
1	hq_isoforms.fasta.no5merge.collapsed.gff	exon	94298554	94298667	.	-	.	gene_id "SE:1:94297558-94298554:94298667-94303079:-"; transcript_id "SE:1:94297558-94298554:94298667-94303079:-:alternative1";
1	hq_isoforms.fasta.no5merge.collapsed.gff	exon	94303079	94303179	.	-	.	gene_id "SE:1:94297558-94298554:94298667-94303079:-"; transcript_id "SE:1:94297558-94298554:94298667-94303079:-:alternative1";
1	hq_isoforms.fasta.no5merge.collapsed.gff	exon	94297458	94297558	.	-	.	gene_id "SE:1:94297558-94298478:94298667-94303079:-"; transcript_id "SE:1:94297558-94298478:94298667-94303079:-:alternative2";
1	hq_isoforms.fasta.no5merge.collapsed.gff	exon	94303079	94303179	.	-	.	gene_id "SE:1:94297558-94298478:94298667-94303079:-"; transcript_id "SE:1:94297558-94298478:94298667-94303079:-:alternative2";
1	hq_isoforms.fasta.no5merge.collapsed.gff	exon	94297458	94297558	.	-	.	gene_id "SE:1:94297558-94298478:94298667-94303079:-"; transcript_id "SE:1:94297558-94298478:94298667-94303079:-:alternative1";
1	hq_isoforms.fasta.no5merge.collapsed.gff	exon	94298478	94298667	.	-	.	gene_id "SE:1:94297558-94298478:94298667-94303079:-"; transcript_id "SE:1:94297558-94298478:94298667-94303079:-:alternative1";
1	hq_isoforms.fasta.no5merge.collapsed.gff	exon	94303079	94303179	.	-	.	gene_id "SE:1:94297558-94298478:94298667-94303079:-"; transcript_id "SE:1:94297558-94298478:94298667-94303079:-:alternative1";
1	hq_isoforms.fasta.no5merge.collapsed.gff	exon	94272867	94272967	.	-	.	gene_id "SE:1:94272967-94284010:94284171-94289317:-"; transcript_id "SE:1:94272967-94284010:94284171-94289317:-:alternative2";
1	hq_isoforms.fasta.no5merge.collapsed.gff	exon	94289317	94289417	.	-	.	gene_id "SE:1:94272967-94284010:94284171-94289317:-"; transcript_id "SE:1:94272967-94284010:94284171-94289317:-:alternative2";
1	hq_isoforms.fasta.no5merge.collapsed.gff	exon	94272867	94272967	.	-	.	gene_id "SE:1:94272967-94284010:94284171-94289317:-"; transcript_id "SE:1:94272967-94284010:94284171-94289317:-:alternative1";
1	hq_isoforms.fasta.no5merge.collapsed.gff	exon	94284010	94284171	.	-	.	gene_id "SE:1:94272967-94284010:94284171-94289317:-"; transcript_id "SE:1:94272967-94284010:94284171-94289317:-:alternative1";
1	hq_isoforms.fasta.no5merge.collapsed.gff	exon	94289317	94289417	.	-	.	gene_id "SE:1:94272967-94284010:94284171-94289317:-"; transcript_id "SE:1:94272967-94284010:94284171-94289317:-:alternative1";
1	hq_isoforms.fasta.no5merge.collapsed.gff	exon	94272867	94272967	.	-	.	gene_id "SE:1:94272967-94278146:94278205-94284010:-"; transcript_id "SE:1:94272967-94278146:94278205-94284010:-:alternative2";
1	hq_isoforms.fasta.no5merge.collapsed.gff	exon	94284010	94284110	.	-	.	gene_id "SE:1:94272967-94278146:94278205-94284010:-"; transcript_id "SE:1:94272967-94278146:94278205-94284010:-:alternative2";
1	hq_isoforms.fasta.no5merge.collapsed.gff	exon	94272867	94272967	.	-	.	gene_id "SE:1:94272967-94278146:94278205-94284010:-"; transcript_id "SE:1:94272967-94278146:94278205-94284010:-:alternative1";
1	hq_isoforms.fasta.no5merge.collapsed.gff	exon	94278146	94278205	.	-	.	gene_id "SE:1:94272967-94278146:94278205-94284010:-"; transcript_id "SE:1:94272967-94278146:94278205-94284010:-:alternative1";
1	hq_isoforms.fasta.no5merge.collapsed.gff	exon	94284010	94284110	.	-	.	gene_id "SE:1:94272967-94278146:94278205-94284010:-"; transcript_id "SE:1:94272967-94278146:94278205-94284010:-:alternative1";
1	hq_isoforms.fasta.no5merge.collapsed.gff	exon	94278105	94278205	.	-	.	gene_id "SE:1:94278205-94284010:94284171-94289317:-"; transcript_id "SE:1:94278205-94284010:94284171-94289317:-:alternative2";
1	hq_isoforms.fasta.no5merge.collapsed.gff	exon	94289317	94289417	.	-	.	gene_id "SE:1:94278205-94284010:94284171-94289317:-"; transcript_id "SE:1:94278205-94284010:94284171-94289317:-:alternative2";
1	hq_isoforms.fasta.no5merge.collapsed.gff	exon	94278105	94278205	.	-	.	gene_id "SE:1:94278205-94284010:94284171-94289317:-"; transcript_id "SE:1:94278205-94284010:94284171-94289317:-:alternative1";
1	hq_isoforms.fasta.no5merge.collapsed.gff	exon	94284010	94284171	.	-	.	gene_id "SE:1:94278205-94284010:94284171-94289317:-"; transcript_id "SE:1:94278205-94284010:94284171-94289317:-:alternative1";
1	hq_isoforms.fasta.no5merge.collapsed.gff	exon	94289317	94289417	.	-	.	gene_id "SE:1:94278205-94284010:94284171-94289317:-"; transcript_id "SE:1:94278205-94284010:94284171-94289317:-:alternative1";
1	hq_isoforms.fasta.no5merge.collapsed.gff	exon	94272867	94272967	.	-	.	gene_id "SE:1:94272967-94278146:94278205-94289317:-"; transcript_id "SE:1:94272967-94278146:94278205-94289317:-:alternative2";
1	hq_isoforms.fasta.no5merge.collapsed.gff	exon	94289317	94289417	.	-	.	gene_id "SE:1:94272967-94278146:94278205-94289317:-"; transcript_id "SE:1:94272967-94278146:94278205-94289317:-:alternative2";
1	hq_isoforms.fasta.no5merge.collapsed.gff	exon	94272867	94272967	.	-	.	gene_id "SE:1:94272967-94278146:94278205-94289317:-"; transcript_id "SE:1:94272967-94278146:94278205-94289317:-:alternative1";
1	hq_isoforms.fasta.no5merge.collapsed.gff	exon	94278146	94278205	.	-	.	gene_id "SE:1:94272967-94278146:94278205-94289317:-"; transcript_id "SE:1:94272967-94278146:94278205-94289317:-:alternative1";
1	hq_isoforms.fasta.no5merge.collapsed.gff	exon	94289317	94289417	.	-	.	gene_id "SE:1:94272967-94278146:94278205-94289317:-"; transcript_id "SE:1:94272967-94278146:94278205-94289317:-:alternative1";
1	hq_isoforms.fasta.no5merge.collapsed.gff	exon	94257000	94257100	.	-	.	gene_id "SE:1:94257100-94262664:94262705-94267570:-"; transcript_id "SE:1:94257100-94262664:94262705-94267570:-:alternative2";
1	hq_isoforms.fasta.no5merge.collapsed.gff	exon	94267570	94267670	.	-	.	gene_id "SE:1:94257100-94262664:94262705-94267570:-"; transcript_id "SE:1:94257100-94262664:94262705-94267570:-:alternative2";
1	hq_isoforms.fasta.no5merge.collapsed.gff	exon	94257000	94257100	.	-	.	gene_id "SE:1:94257100-94262664:94262705-94267570:-"; transcript_id "SE:1:94257100-94262664:94262705-94267570:-:alternative1";
1	hq_isoforms.fasta.no5merge.collapsed.gff	exon	94262664	94262705	.	-	.	gene_id "SE:1:94257100-94262664:94262705-94267570:-"; transcript_id "SE:1:94257100-94262664:94262705-94267570:-:alternative1";
1	hq_isoforms.fasta.no5merge.collapsed.gff	exon	94267570	94267670	.	-	.	gene_id "SE:1:94257100-94262664:94262705-94267570:-"; transcript_id "SE:1:94257100-94262664:94262705-94267570:-:alternative1";
1	hq_isoforms.fasta.no5merge.collapsed.gff	exon	94268998	94269098	.	-	.	gene_id "SE:1:94269098-94269800:94269892-94272862:-"; transcript_id "SE:1:94269098-94269800:94269892-94272862:-:alternative2";
1	hq_isoforms.fasta.no5merge.collapsed.gff	exon	94272862	94272962	.	-	.	gene_id "SE:1:94269098-94269800:94269892-94272862:-"; transcript_id "SE:1:94269098-94269800:94269892-94272862:-:alternative2";
1	hq_isoforms.fasta.no5merge.collapsed.gff	exon	94268998	94269098	.	-	.	gene_id "SE:1:94269098-94269800:94269892-94272862:-"; transcript_id "SE:1:94269098-94269800:94269892-94272862:-:alternative1";
1	hq_isoforms.fasta.no5merge.collapsed.gff	exon	94269800	94269892	.	-	.	gene_id "SE:1:94269098-94269800:94269892-94272862:-"; transcript_id "SE:1:94269098-94269800:94269892-94272862:-:alternative1";
1	hq_isoforms.fasta.no5merge.collapsed.gff	exon	94272862	94272962	.	-	.	gene_id "SE:1:94269098-94269800:94269892-94272862:-"; transcript_id "SE:1:94269098-94269800:94269892-94272862:-:alternative1";
1	hq_isoforms.fasta.no5merge.collapsed.gff	exon	94295367	94295467	.	-	.	gene_id "SE:1:94295467-94296538:94296716-94297423:-"; transcript_id "SE:1:94295467-94296538:94296716-94297423:-:alternative2";
1	hq_isoforms.fasta.no5merge.collapsed.gff	exon	94297423	94297523	.	-	.	gene_id "SE:1:94295467-94296538:94296716-94297423:-"; transcript_id "SE:1:94295467-94296538:94296716-94297423:-:alternative2";
1	hq_isoforms.fasta.no5merge.collapsed.gff	exon	94295367	94295467	.	-	.	gene_id "SE:1:94295467-94296538:94296716-94297423:-"; transcript_id "SE:1:94295467-94296538:94296716-94297423:-:alternative1";
1	hq_isoforms.fasta.no5merge.collapsed.gff	exon	94296538	94296716	.	-	.	gene_id "SE:1:94295467-94296538:94296716-94297423:-"; transcript_id "SE:1:94295467-94296538:94296716-94297423:-:alternative1";
1	hq_isoforms.fasta.no5merge.collapsed.gff	exon	94297423	94297523	.	-	.	gene_id "SE:1:94295467-94296538:94296716-94297423:-"; transcript_id "SE:1:94295467-94296538:94296716-94297423:-:alternative1";
1	hq_isoforms.fasta.no5merge.collapsed.gff	exon	94297458	94297558	.	-	.	gene_id "SE:1:94297558-94298611:94298667-94303079:-"; transcript_id "SE:1:94297558-94298611:94298667-94303079:-:alternative2";
1	hq_isoforms.fasta.no5merge.collapsed.gff	exon	94303079	94303179	.	-	.	gene_id "SE:1:94297558-94298611:94298667-94303079:-"; transcript_id "SE:1:94297558-94298611:94298667-94303079:-:alternative2";
1	hq_isoforms.fasta.no5merge.collapsed.gff	exon	94297458	94297558	.	-	.	gene_id "SE:1:94297558-94298611:94298667-94303079:-"; transcript_id "SE:1:94297558-94298611:94298667-94303079:-:alternative1";
1	hq_isoforms.fasta.no5merge.collapsed.gff	exon	94298611	94298667	.	-	.	gene_id "SE:1:94297558-94298611:94298667-94303079:-"; transcript_id "SE:1:94297558-94298611:94298667-94303079:-:alternative1";
1	hq_isoforms.fasta.no5merge.collapsed.gff	exon	94303079	94303179	.	-	.	gene_id "SE:1:94297558-94298611:94298667-94303079:-"; transcript_id "SE:1:94297558-94298611:94298667-94303079:-:alternative1";
1	hq_isoforms.fasta.no5merge.collapsed.gff	exon	94338243	94338343	.	-	.	gene_id "SE:1:94338343-94342953:94343058-94346463:-"; transcript_id "SE:1:94338343-94342953:94343058-94346463:-:alternative2";
1	hq_isoforms.fasta.no5merge.collapsed.gff	exon	94346463	94346563	.	-	.	gene_id "SE:1:94338343-94342953:94343058-94346463:-"; transcript_id "SE:1:94338343-94342953:94343058-94346463:-:alternative2";
1	hq_isoforms.fasta.no5merge.collapsed.gff	exon	94338243	94338343	.	-	.	gene_id "SE:1:94338343-94342953:94343058-94346463:-"; transcript_id "SE:1:94338343-94342953:94343058-94346463:-:alternative1";
1	hq_isoforms.fasta.no5merge.collapsed.gff	exon	94342953	94343058	.	-	.	gene_id "SE:1:94338343-94342953:94343058-94346463:-"; transcript_id "SE:1:94338343-94342953:94343058-94346463:-:alternative1";
1	hq_isoforms.fasta.no5merge.collapsed.gff	exon	94346463	94346563	.	-	.	gene_id "SE:1:94338343-94342953:94343058-94346463:-"; transcript_id "SE:1:94338343-94342953:94343058-94346463:-:alternative1";
1	hq_isoforms.fasta.no5merge.collapsed.gff	exon	94344788	94344888	.	-	.	gene_id "SE:1:94344888-94345499:94345630-94346463:-"; transcript_id "SE:1:94344888-94345499:94345630-94346463:-:alternative2";
1	hq_isoforms.fasta.no5merge.collapsed.gff	exon	94346463	94346563	.	-	.	gene_id "SE:1:94344888-94345499:94345630-94346463:-"; transcript_id "SE:1:94344888-94345499:94345630-94346463:-:alternative2";
1	hq_isoforms.fasta.no5merge.collapsed.gff	exon	94344788	94344888	.	-	.	gene_id "SE:1:94344888-94345499:94345630-94346463:-"; transcript_id "SE:1:94344888-94345499:94345630-94346463:-:alternative1";
1	hq_isoforms.fasta.no5merge.collapsed.gff	exon	94345499	94345630	.	-	.	gene_id "SE:1:94344888-94345499:94345630-94346463:-"; transcript_id "SE:1:94344888-94345499:94345630-94346463:-:alternative1";
1	hq_isoforms.fasta.no5merge.collapsed.gff	exon	94346463	94346563	.	-	.	gene_id "SE:1:94344888-94345499:94345630-94346463:-"; transcript_id "SE:1:94344888-94345499:94345630-94346463:-:alternative1";
1	hq_isoforms.fasta.no5merge.collapsed.gff	exon	94338243	94338343	.	-	.	gene_id "SE:1:94338343-94344815:94344888-94346463:-"; transcript_id "SE:1:94338343-94344815:94344888-94346463:-:alternative2";
1	hq_isoforms.fasta.no5merge.collapsed.gff	exon	94346463	94346563	.	-	.	gene_id "SE:1:94338343-94344815:94344888-94346463:-"; transcript_id "SE:1:94338343-94344815:94344888-94346463:-:alternative2";
1	hq_isoforms.fasta.no5merge.collapsed.gff	exon	94338243	94338343	.	-	.	gene_id "SE:1:94338343-94344815:94344888-94346463:-"; transcript_id "SE:1:94338343-94344815:94344888-94346463:-:alternative1";
1	hq_isoforms.fasta.no5merge.collapsed.gff	exon	94344815	94344888	.	-	.	gene_id "SE:1:94338343-94344815:94344888-94346463:-"; transcript_id "SE:1:94338343-94344815:94344888-94346463:-:alternative1";
1	hq_isoforms.fasta.no5merge.collapsed.gff	exon	94346463	94346563	.	-	.	gene_id "SE:1:94338343-94344815:94344888-94346463:-"; transcript_id "SE:1:94338343-94344815:94344888-94346463:-:alternative1";
1	hq_isoforms.fasta.no5merge.collapsed.gff	exon	94338243	94338343	.	-	.	gene_id "SE:1:94338343-94346463:94346595-94353874:-"; transcript_id "SE:1:94338343-94346463:94346595-94353874:-:alternative2";
1	hq_isoforms.fasta.no5merge.collapsed.gff	exon	94353874	94353974	.	-	.	gene_id "SE:1:94338343-94346463:94346595-94353874:-"; transcript_id "SE:1:94338343-94346463:94346595-94353874:-:alternative2";
1	hq_isoforms.fasta.no5merge.collapsed.gff	exon	94338243	94338343	.	-	.	gene_id "SE:1:94338343-94346463:94346595-94353874:-"; transcript_id "SE:1:94338343-94346463:94346595-94353874:-:alternative1";
1	hq_isoforms.fasta.no5merge.collapsed.gff	exon	94346463	94346595	.	-	.	gene_id "SE:1:94338343-94346463:94346595-94353874:-"; transcript_id "SE:1:94338343-94346463:94346595-94353874:-:alternative1";
1	hq_isoforms.fasta.no5merge.collapsed.gff	exon	94353874	94353974	.	-	.	gene_id "SE:1:94338343-94346463:94346595-94353874:-"; transcript_id "SE:1:94338343-94346463:94346595-94353874:-:alternative1";
1	hq_isoforms.fasta.no5merge.collapsed.gff	exon	94671171	94671271	.	-	.	gene_id "SE:1:94671271-94671403:94671487-94673298:-"; transcript_id "SE:1:94671271-94671403:94671487-94673298:-:alternative2";
1	hq_isoforms.fasta.no5merge.collapsed.gff	exon	94673298	94673398	.	-	.	gene_id "SE:1:94671271-94671403:94671487-94673298:-"; transcript_id "SE:1:94671271-94671403:94671487-94673298:-:alternative2";
1	hq_isoforms.fasta.no5merge.collapsed.gff	exon	94671171	94671271	.	-	.	gene_id "SE:1:94671271-94671403:94671487-94673298:-"; transcript_id "SE:1:94671271-94671403:94671487-94673298:-:alternative1";
1	hq_isoforms.fasta.no5merge.collapsed.gff	exon	94671403	94671487	.	-	.	gene_id "SE:1:94671271-94671403:94671487-94673298:-"; transcript_id "SE:1:94671271-94671403:94671487-94673298:-:alternative1";
1	hq_isoforms.fasta.no5merge.collapsed.gff	exon	94673298	94673398	.	-	.	gene_id "SE:1:94671271-94671403:94671487-94673298:-"; transcript_id "SE:1:94671271-94671403:94671487-94673298:-:alternative1";
1	hq_isoforms.fasta.no5merge.collapsed.gff	exon	95100631	95100731	.	-	.	gene_id "SE:1:95100731-95101724:95101814-95106574:-"; transcript_id "SE:1:95100731-95101724:95101814-95106574:-:alternative2";
1	hq_isoforms.fasta.no5merge.collapsed.gff	exon	95106574	95106674	.	-	.	gene_id "SE:1:95100731-95101724:95101814-95106574:-"; transcript_id "SE:1:95100731-95101724:95101814-95106574:-:alternative2";
1	hq_isoforms.fasta.no5merge.collapsed.gff	exon	95100631	95100731	.	-	.	gene_id "SE:1:95100731-95101724:95101814-95106574:-"; transcript_id "SE:1:95100731-95101724:95101814-95106574:-:alternative1";
1	hq_isoforms.fasta.no5merge.collapsed.gff	exon	95101724	95101814	.	-	.	gene_id "SE:1:95100731-95101724:95101814-95106574:-"; transcript_id "SE:1:95100731-95101724:95101814-95106574:-:alternative1";
1	hq_isoforms.fasta.no5merge.collapsed.gff	exon	95106574	95106674	.	-	.	gene_id "SE:1:95100731-95101724:95101814-95106574:-"; transcript_id "SE:1:95100731-95101724:95101814-95106574:-:alternative1";
1	hq_isoforms.fasta.no5merge.collapsed.gff	exon	95150185	95150285	.	-	.	gene_id "SE:1:95150285-95151254:95151321-95153138:-"; transcript_id "SE:1:95150285-95151254:95151321-95153138:-:alternative2";
1	hq_isoforms.fasta.no5merge.collapsed.gff	exon	95153138	95153238	.	-	.	gene_id "SE:1:95150285-95151254:95151321-95153138:-"; transcript_id "SE:1:95150285-95151254:95151321-95153138:-:alternative2";
1	hq_isoforms.fasta.no5merge.collapsed.gff	exon	95150185	95150285	.	-	.	gene_id "SE:1:95150285-95151254:95151321-95153138:-"; transcript_id "SE:1:95150285-95151254:95151321-95153138:-:alternative1";
1	hq_isoforms.fasta.no5merge.collapsed.gff	exon	95151254	95151321	.	-	.	gene_id "SE:1:95150285-95151254:95151321-95153138:-"; transcript_id "SE:1:95150285-95151254:95151321-95153138:-:alternative1";
1	hq_isoforms.fasta.no5merge.collapsed.gff	exon	95153138	95153238	.	-	.	gene_id "SE:1:95150285-95151254:95151321-95153138:-"; transcript_id "SE:1:95150285-95151254:95151321-95153138:-:alternative1";
1	hq_isoforms.fasta.no5merge.collapsed.gff	exon	95158180	95158280	.	-	.	gene_id "SE:1:95158280-95160582:95160640-95161429:-"; transcript_id "SE:1:95158280-95160582:95160640-95161429:-:alternative2";
1	hq_isoforms.fasta.no5merge.collapsed.gff	exon	95161429	95161529	.	-	.	gene_id "SE:1:95158280-95160582:95160640-95161429:-"; transcript_id "SE:1:95158280-95160582:95160640-95161429:-:alternative2";
1	hq_isoforms.fasta.no5merge.collapsed.gff	exon	95158180	95158280	.	-	.	gene_id "SE:1:95158280-95160582:95160640-95161429:-"; transcript_id "SE:1:95158280-95160582:95160640-95161429:-:alternative1";
1	hq_isoforms.fasta.no5merge.collapsed.gff	exon	95160582	95160640	.	-	.	gene_id "SE:1:95158280-95160582:95160640-95161429:-"; transcript_id "SE:1:95158280-95160582:95160640-95161429:-:alternative1";
1	hq_isoforms.fasta.no5merge.collapsed.gff	exon	95161429	95161529	.	-	.	gene_id "SE:1:95158280-95160582:95160640-95161429:-"; transcript_id "SE:1:95158280-95160582:95160640-95161429:-:alternative1";
1	hq_isoforms.fasta.no5merge.collapsed.gff	exon	99844493	99844593	.	-	.	gene_id "SE:1:99844593-99849079:99849339-99856877:-"; transcript_id "SE:1:99844593-99849079:99849339-99856877:-:alternative2";
1	hq_isoforms.fasta.no5merge.collapsed.gff	exon	99856877	99856977	.	-	.	gene_id "SE:1:99844593-99849079:99849339-99856877:-"; transcript_id "SE:1:99844593-99849079:99849339-99856877:-:alternative2";
1	hq_isoforms.fasta.no5merge.collapsed.gff	exon	99844493	99844593	.	-	.	gene_id "SE:1:99844593-99849079:99849339-99856877:-"; transcript_id "SE:1:99844593-99849079:99849339-99856877:-:alternative1";
1	hq_isoforms.fasta.no5merge.collapsed.gff	exon	99849079	99849339	.	-	.	gene_id "SE:1:99844593-99849079:99849339-99856877:-"; transcript_id "SE:1:99844593-99849079:99849339-99856877:-:alternative1";
1	hq_isoforms.fasta.no5merge.collapsed.gff	exon	99856877	99856977	.	-	.	gene_id "SE:1:99844593-99849079:99849339-99856877:-"; transcript_id "SE:1:99844593-99849079:99849339-99856877:-:alternative1";
1	hq_isoforms.fasta.no5merge.collapsed.gff	exon	99880538	99880638	.	-	.	gene_id "SE:1:99880638-99884973:99885098-99885466:-"; transcript_id "SE:1:99880638-99884973:99885098-99885466:-:alternative2";
1	hq_isoforms.fasta.no5merge.collapsed.gff	exon	99885466	99885566	.	-	.	gene_id "SE:1:99880638-99884973:99885098-99885466:-"; transcript_id "SE:1:99880638-99884973:99885098-99885466:-:alternative2";
1	hq_isoforms.fasta.no5merge.collapsed.gff	exon	99880538	99880638	.	-	.	gene_id "SE:1:99880638-99884973:99885098-99885466:-"; transcript_id "SE:1:99880638-99884973:99885098-99885466:-:alternative1";
1	hq_isoforms.fasta.no5merge.collapsed.gff	exon	99884973	99885098	.	-	.	gene_id "SE:1:99880638-99884973:99885098-99885466:-"; transcript_id "SE:1:99880638-99884973:99885098-99885466:-:alternative1";
1	hq_isoforms.fasta.no5merge.collapsed.gff	exon	99885466	99885566	.	-	.	gene_id "SE:1:99880638-99884973:99885098-99885466:-"; transcript_id "SE:1:99880638-99884973:99885098-99885466:-:alternative1";
1	hq_isoforms.fasta.no5merge.collapsed.gff	exon	101193667	101193767	.	-	.	gene_id "SE:1:101193767-101196122:101196162-101202803:-"; transcript_id "SE:1:101193767-101196122:101196162-101202803:-:alternative2";
1	hq_isoforms.fasta.no5merge.collapsed.gff	exon	101202803	101202903	.	-	.	gene_id "SE:1:101193767-101196122:101196162-101202803:-"; transcript_id "SE:1:101193767-101196122:101196162-101202803:-:alternative2";
1	hq_isoforms.fasta.no5merge.collapsed.gff	exon	101193667	101193767	.	-	.	gene_id "SE:1:101193767-101196122:101196162-101202803:-"; transcript_id "SE:1:101193767-101196122:101196162-101202803:-:alternative1";
1	hq_isoforms.fasta.no5merge.collapsed.gff	exon	101196122	101196162	.	-	.	gene_id "SE:1:101193767-101196122:101196162-101202803:-"; transcript_id "SE:1:101193767-101196122:101196162-101202803:-:alternative1";
1	hq_isoforms.fasta.no5merge.collapsed.gff	exon	101202803	101202903	.	-	.	gene_id "SE:1:101193767-101196122:101196162-101202803:-"; transcript_id "SE:1:101193767-101196122:101196162-101202803:-:alternative1";
1	hq_isoforms.fasta.no5merge.collapsed.gff	exon	102448666	102448766	.	-	.	gene_id "SE:1:102448766-102450652:102450787-102459938:-"; transcript_id "SE:1:102448766-102450652:102450787-102459938:-:alternative2";
1	hq_isoforms.fasta.no5merge.collapsed.gff	exon	102459938	102460038	.	-	.	gene_id "SE:1:102448766-102450652:102450787-102459938:-"; transcript_id "SE:1:102448766-102450652:102450787-102459938:-:alternative2";
1	hq_isoforms.fasta.no5merge.collapsed.gff	exon	102448666	102448766	.	-	.	gene_id "SE:1:102448766-102450652:102450787-102459938:-"; transcript_id "SE:1:102448766-102450652:102450787-102459938:-:alternative1";
1	hq_isoforms.fasta.no5merge.collapsed.gff	exon	102450652	102450787	.	-	.	gene_id "SE:1:102448766-102450652:102450787-102459938:-"; transcript_id "SE:1:102448766-102450652:102450787-102459938:-:alternative1";
1	hq_isoforms.fasta.no5merge.collapsed.gff	exon	102459938	102460038	.	-	.	gene_id "SE:1:102448766-102450652:102450787-102459938:-"; transcript_id "SE:1:102448766-102450652:102450787-102459938:-:alternative1";
1	hq_isoforms.fasta.no5merge.collapsed.gff	exon	108317928	108318028	.	-	.	gene_id "SE:1:108318028-108319618:108319684-108319950:-"; transcript_id "SE:1:108318028-108319618:108319684-108319950:-:alternative2";
1	hq_isoforms.fasta.no5merge.collapsed.gff	exon	108319950	108320050	.	-	.	gene_id "SE:1:108318028-108319618:108319684-108319950:-"; transcript_id "SE:1:108318028-108319618:108319684-108319950:-:alternative2";
1	hq_isoforms.fasta.no5merge.collapsed.gff	exon	108317928	108318028	.	-	.	gene_id "SE:1:108318028-108319618:108319684-108319950:-"; transcript_id "SE:1:108318028-108319618:108319684-108319950:-:alternative1";
1	hq_isoforms.fasta.no5merge.collapsed.gff	exon	108319618	108319684	.	-	.	gene_id "SE:1:108318028-108319618:108319684-108319950:-"; transcript_id "SE:1:108318028-108319618:108319684-108319950:-:alternative1";
1	hq_isoforms.fasta.no5merge.collapsed.gff	exon	108319950	108320050	.	-	.	gene_id "SE:1:108318028-108319618:108319684-108319950:-"; transcript_id "SE:1:108318028-108319618:108319684-108319950:-:alternative1";
1	hq_isoforms.fasta.no5merge.collapsed.gff	exon	108321124	108321224	.	-	.	gene_id "SE:1:108321224-108321604:108321711-108323247:-"; transcript_id "SE:1:108321224-108321604:108321711-108323247:-:alternative2";
1	hq_isoforms.fasta.no5merge.collapsed.gff	exon	108323247	108323347	.	-	.	gene_id "SE:1:108321224-108321604:108321711-108323247:-"; transcript_id "SE:1:108321224-108321604:108321711-108323247:-:alternative2";
1	hq_isoforms.fasta.no5merge.collapsed.gff	exon	108321124	108321224	.	-	.	gene_id "SE:1:108321224-108321604:108321711-108323247:-"; transcript_id "SE:1:108321224-108321604:108321711-108323247:-:alternative1";
1	hq_isoforms.fasta.no5merge.collapsed.gff	exon	108321604	108321711	.	-	.	gene_id "SE:1:108321224-108321604:108321711-108323247:-"; transcript_id "SE:1:108321224-108321604:108321711-108323247:-:alternative1";
1	hq_isoforms.fasta.no5merge.collapsed.gff	exon	108323247	108323347	.	-	.	gene_id "SE:1:108321224-108321604:108321711-108323247:-"; transcript_id "SE:1:108321224-108321604:108321711-108323247:-:alternative1";
1	hq_isoforms.fasta.no5merge.collapsed.gff	exon	107193591	107193691	.	-	.	gene_id "SE:1:107193691-107194338:107194405-107194521:-"; transcript_id "SE:1:107193691-107194338:107194405-107194521:-:alternative2";
1	hq_isoforms.fasta.no5merge.collapsed.gff	exon	107194521	107194621	.	-	.	gene_id "SE:1:107193691-107194338:107194405-107194521:-"; transcript_id "SE:1:107193691-107194338:107194405-107194521:-:alternative2";
1	hq_isoforms.fasta.no5merge.collapsed.gff	exon	107193591	107193691	.	-	.	gene_id "SE:1:107193691-107194338:107194405-107194521:-"; transcript_id "SE:1:107193691-107194338:107194405-107194521:-:alternative1";
1	hq_isoforms.fasta.no5merge.collapsed.gff	exon	107194338	107194405	.	-	.	gene_id "SE:1:107193691-107194338:107194405-107194521:-"; transcript_id "SE:1:107193691-107194338:107194405-107194521:-:alternative1";
1	hq_isoforms.fasta.no5merge.collapsed.gff	exon	107194521	107194621	.	-	.	gene_id "SE:1:107193691-107194338:107194405-107194521:-"; transcript_id "SE:1:107193691-107194338:107194405-107194521:-:alternative1";
1	hq_isoforms.fasta.no5merge.collapsed.gff	exon	107218485	107218585	.	-	.	gene_id "SE:1:107218585-107219211:107219309-107219757:-"; transcript_id "SE:1:107218585-107219211:107219309-107219757:-:alternative2";
1	hq_isoforms.fasta.no5merge.collapsed.gff	exon	107219757	107219857	.	-	.	gene_id "SE:1:107218585-107219211:107219309-107219757:-"; transcript_id "SE:1:107218585-107219211:107219309-107219757:-:alternative2";
1	hq_isoforms.fasta.no5merge.collapsed.gff	exon	107218485	107218585	.	-	.	gene_id "SE:1:107218585-107219211:107219309-107219757:-"; transcript_id "SE:1:107218585-107219211:107219309-107219757:-:alternative1";
1	hq_isoforms.fasta.no5merge.collapsed.gff	exon	107219211	107219309	.	-	.	gene_id "SE:1:107218585-107219211:107219309-107219757:-"; transcript_id "SE:1:107218585-107219211:107219309-107219757:-:alternative1";
1	hq_isoforms.fasta.no5merge.collapsed.gff	exon	107219757	107219857	.	-	.	gene_id "SE:1:107218585-107219211:107219309-107219757:-"; transcript_id "SE:1:107218585-107219211:107219309-107219757:-:alternative1";
1	hq_isoforms.fasta.no5merge.collapsed.gff	exon	107426450	107426550	.	-	.	gene_id "SE:1:107426550-107434707:107434872-107437302:-"; transcript_id "SE:1:107426550-107434707:107434872-107437302:-:alternative2";
1	hq_isoforms.fasta.no5merge.collapsed.gff	exon	107437302	107437402	.	-	.	gene_id "SE:1:107426550-107434707:107434872-107437302:-"; transcript_id "SE:1:107426550-107434707:107434872-107437302:-:alternative2";
1	hq_isoforms.fasta.no5merge.collapsed.gff	exon	107426450	107426550	.	-	.	gene_id "SE:1:107426550-107434707:107434872-107437302:-"; transcript_id "SE:1:107426550-107434707:107434872-107437302:-:alternative1";
1	hq_isoforms.fasta.no5merge.collapsed.gff	exon	107434707	107434872	.	-	.	gene_id "SE:1:107426550-107434707:107434872-107437302:-"; transcript_id "SE:1:107426550-107434707:107434872-107437302:-:alternative1";
1	hq_isoforms.fasta.no5merge.collapsed.gff	exon	107437302	107437402	.	-	.	gene_id "SE:1:107426550-107434707:107434872-107437302:-"; transcript_id "SE:1:107426550-107434707:107434872-107437302:-:alternative1";
1	hq_isoforms.fasta.no5merge.collapsed.gff	exon	108237772	108237872	.	-	.	gene_id "SE:1:108237872-108240000:108240023-108242363:-"; transcript_id "SE:1:108237872-108240000:108240023-108242363:-:alternative2";
1	hq_isoforms.fasta.no5merge.collapsed.gff	exon	108242363	108242463	.	-	.	gene_id "SE:1:108237872-108240000:108240023-108242363:-"; transcript_id "SE:1:108237872-108240000:108240023-108242363:-:alternative2";
1	hq_isoforms.fasta.no5merge.collapsed.gff	exon	108237772	108237872	.	-	.	gene_id "SE:1:108237872-108240000:108240023-108242363:-"; transcript_id "SE:1:108237872-108240000:108240023-108242363:-:alternative1";
1	hq_isoforms.fasta.no5merge.collapsed.gff	exon	108240000	108240023	.	-	.	gene_id "SE:1:108237872-108240000:108240023-108242363:-"; transcript_id "SE:1:108237872-108240000:108240023-108242363:-:alternative1";
1	hq_isoforms.fasta.no5merge.collapsed.gff	exon	108242363	108242463	.	-	.	gene_id "SE:1:108237872-108240000:108240023-108242363:-"; transcript_id "SE:1:108237872-108240000:108240023-108242363:-:alternative1";
1	hq_isoforms.fasta.no5merge.collapsed.gff	exon	108245819	108245919	.	-	.	gene_id "SE:1:108245919-108246014:108246052-108247670:-"; transcript_id "SE:1:108245919-108246014:108246052-108247670:-:alternative2";
1	hq_isoforms.fasta.no5merge.collapsed.gff	exon	108247670	108247770	.	-	.	gene_id "SE:1:108245919-108246014:108246052-108247670:-"; transcript_id "SE:1:108245919-108246014:108246052-108247670:-:alternative2";
1	hq_isoforms.fasta.no5merge.collapsed.gff	exon	108245819	108245919	.	-	.	gene_id "SE:1:108245919-108246014:108246052-108247670:-"; transcript_id "SE:1:108245919-108246014:108246052-108247670:-:alternative1";
1	hq_isoforms.fasta.no5merge.collapsed.gff	exon	108246014	108246052	.	-	.	gene_id "SE:1:108245919-108246014:108246052-108247670:-"; transcript_id "SE:1:108245919-108246014:108246052-108247670:-:alternative1";
1	hq_isoforms.fasta.no5merge.collapsed.gff	exon	108247670	108247770	.	-	.	gene_id "SE:1:108245919-108246014:108246052-108247670:-"; transcript_id "SE:1:108245919-108246014:108246052-108247670:-:alternative1";
1	hq_isoforms.fasta.no5merge.collapsed.gff	exon	108247617	108247717	.	-	.	gene_id "SE:1:108247717-108252472:108252510-108253130:-"; transcript_id "SE:1:108247717-108252472:108252510-108253130:-:alternative2";
1	hq_isoforms.fasta.no5merge.collapsed.gff	exon	108253130	108253230	.	-	.	gene_id "SE:1:108247717-108252472:108252510-108253130:-"; transcript_id "SE:1:108247717-108252472:108252510-108253130:-:alternative2";
1	hq_isoforms.fasta.no5merge.collapsed.gff	exon	108247617	108247717	.	-	.	gene_id "SE:1:108247717-108252472:108252510-108253130:-"; transcript_id "SE:1:108247717-108252472:108252510-108253130:-:alternative1";
1	hq_isoforms.fasta.no5merge.collapsed.gff	exon	108252472	108252510	.	-	.	gene_id "SE:1:108247717-108252472:108252510-108253130:-"; transcript_id "SE:1:108247717-108252472:108252510-108253130:-:alternative1";
1	hq_isoforms.fasta.no5merge.collapsed.gff	exon	108253130	108253230	.	-	.	gene_id "SE:1:108247717-108252472:108252510-108253130:-"; transcript_id "SE:1:108247717-108252472:108252510-108253130:-:alternative1";
1	hq_isoforms.fasta.no5merge.collapsed.gff	exon	108245819	108245919	.	-	.	gene_id "SE:1:108245919-108247670:108247717-108253130:-"; transcript_id "SE:1:108245919-108247670:108247717-108253130:-:alternative2";
1	hq_isoforms.fasta.no5merge.collapsed.gff	exon	108253130	108253230	.	-	.	gene_id "SE:1:108245919-108247670:108247717-108253130:-"; transcript_id "SE:1:108245919-108247670:108247717-108253130:-:alternative2";
1	hq_isoforms.fasta.no5merge.collapsed.gff	exon	108245819	108245919	.	-	.	gene_id "SE:1:108245919-108247670:108247717-108253130:-"; transcript_id "SE:1:108245919-108247670:108247717-108253130:-:alternative1";
1	hq_isoforms.fasta.no5merge.collapsed.gff	exon	108247670	108247717	.	-	.	gene_id "SE:1:108245919-108247670:108247717-108253130:-"; transcript_id "SE:1:108245919-108247670:108247717-108253130:-:alternative1";
1	hq_isoforms.fasta.no5merge.collapsed.gff	exon	108253130	108253230	.	-	.	gene_id "SE:1:108245919-108247670:108247717-108253130:-"; transcript_id "SE:1:108245919-108247670:108247717-108253130:-:alternative1";
1	hq_isoforms.fasta.no5merge.collapsed.gff	exon	108315181	108315281	.	-	.	gene_id "SE:1:108315281-108317412:108317566-108317882:-"; transcript_id "SE:1:108315281-108317412:108317566-108317882:-:alternative2";
1	hq_isoforms.fasta.no5merge.collapsed.gff	exon	108317882	108317982	.	-	.	gene_id "SE:1:108315281-108317412:108317566-108317882:-"; transcript_id "SE:1:108315281-108317412:108317566-108317882:-:alternative2";
1	hq_isoforms.fasta.no5merge.collapsed.gff	exon	108315181	108315281	.	-	.	gene_id "SE:1:108315281-108317412:108317566-108317882:-"; transcript_id "SE:1:108315281-108317412:108317566-108317882:-:alternative1";
1	hq_isoforms.fasta.no5merge.collapsed.gff	exon	108317412	108317566	.	-	.	gene_id "SE:1:108315281-108317412:108317566-108317882:-"; transcript_id "SE:1:108315281-108317412:108317566-108317882:-:alternative1";
1	hq_isoforms.fasta.no5merge.collapsed.gff	exon	108317882	108317982	.	-	.	gene_id "SE:1:108315281-108317412:108317566-108317882:-"; transcript_id "SE:1:108315281-108317412:108317566-108317882:-:alternative1";
1	hq_isoforms.fasta.no5merge.collapsed.gff	exon	108597325	108597425	.	-	.	gene_id "SE:1:108597425-108598695:108598820-108601578:-"; transcript_id "SE:1:108597425-108598695:108598820-108601578:-:alternative2";
1	hq_isoforms.fasta.no5merge.collapsed.gff	exon	108601578	108601678	.	-	.	gene_id "SE:1:108597425-108598695:108598820-108601578:-"; transcript_id "SE:1:108597425-108598695:108598820-108601578:-:alternative2";
1	hq_isoforms.fasta.no5merge.collapsed.gff	exon	108597325	108597425	.	-	.	gene_id "SE:1:108597425-108598695:108598820-108601578:-"; transcript_id "SE:1:108597425-108598695:108598820-108601578:-:alternative1";
1	hq_isoforms.fasta.no5merge.collapsed.gff	exon	108598695	108598820	.	-	.	gene_id "SE:1:108597425-108598695:108598820-108601578:-"; transcript_id "SE:1:108597425-108598695:108598820-108601578:-:alternative1";
1	hq_isoforms.fasta.no5merge.collapsed.gff	exon	108601578	108601678	.	-	.	gene_id "SE:1:108597425-108598695:108598820-108601578:-"; transcript_id "SE:1:108597425-108598695:108598820-108601578:-:alternative1";
1	hq_isoforms.fasta.no5merge.collapsed.gff	exon	109210490	109210590	.	-	.	gene_id "SE:1:109210590-109212859:109212936-109243044:-"; transcript_id "SE:1:109210590-109212859:109212936-109243044:-:alternative2";
1	hq_isoforms.fasta.no5merge.collapsed.gff	exon	109243044	109243144	.	-	.	gene_id "SE:1:109210590-109212859:109212936-109243044:-"; transcript_id "SE:1:109210590-109212859:109212936-109243044:-:alternative2";
1	hq_isoforms.fasta.no5merge.collapsed.gff	exon	109210490	109210590	.	-	.	gene_id "SE:1:109210590-109212859:109212936-109243044:-"; transcript_id "SE:1:109210590-109212859:109212936-109243044:-:alternative1";
1	hq_isoforms.fasta.no5merge.collapsed.gff	exon	109212859	109212936	.	-	.	gene_id "SE:1:109210590-109212859:109212936-109243044:-"; transcript_id "SE:1:109210590-109212859:109212936-109243044:-:alternative1";
1	hq_isoforms.fasta.no5merge.collapsed.gff	exon	109243044	109243144	.	-	.	gene_id "SE:1:109210590-109212859:109212936-109243044:-"; transcript_id "SE:1:109210590-109212859:109212936-109243044:-:alternative1";
1	hq_isoforms.fasta.no5merge.collapsed.gff	exon	109210490	109210590	.	-	.	gene_id "SE:1:109210590-109212745:109212936-109243044:-"; transcript_id "SE:1:109210590-109212745:109212936-109243044:-:alternative2";
1	hq_isoforms.fasta.no5merge.collapsed.gff	exon	109243044	109243144	.	-	.	gene_id "SE:1:109210590-109212745:109212936-109243044:-"; transcript_id "SE:1:109210590-109212745:109212936-109243044:-:alternative2";
1	hq_isoforms.fasta.no5merge.collapsed.gff	exon	109210490	109210590	.	-	.	gene_id "SE:1:109210590-109212745:109212936-109243044:-"; transcript_id "SE:1:109210590-109212745:109212936-109243044:-:alternative1";
1	hq_isoforms.fasta.no5merge.collapsed.gff	exon	109212745	109212936	.	-	.	gene_id "SE:1:109210590-109212745:109212936-109243044:-"; transcript_id "SE:1:109210590-109212745:109212936-109243044:-:alternative1";
1	hq_isoforms.fasta.no5merge.collapsed.gff	exon	109243044	109243144	.	-	.	gene_id "SE:1:109210590-109212745:109212936-109243044:-"; transcript_id "SE:1:109210590-109212745:109212936-109243044:-:alternative1";
1	hq_isoforms.fasta.no5merge.collapsed.gff	exon	109866795	109866895	.	-	.	gene_id "SE:1:109866895-109867845:109867940-109868388:-"; transcript_id "SE:1:109866895-109867845:109867940-109868388:-:alternative2";
1	hq_isoforms.fasta.no5merge.collapsed.gff	exon	109868388	109868488	.	-	.	gene_id "SE:1:109866895-109867845:109867940-109868388:-"; transcript_id "SE:1:109866895-109867845:109867940-109868388:-:alternative2";
1	hq_isoforms.fasta.no5merge.collapsed.gff	exon	109866795	109866895	.	-	.	gene_id "SE:1:109866895-109867845:109867940-109868388:-"; transcript_id "SE:1:109866895-109867845:109867940-109868388:-:alternative1";
1	hq_isoforms.fasta.no5merge.collapsed.gff	exon	109867845	109867940	.	-	.	gene_id "SE:1:109866895-109867845:109867940-109868388:-"; transcript_id "SE:1:109866895-109867845:109867940-109868388:-:alternative1";
1	hq_isoforms.fasta.no5merge.collapsed.gff	exon	109868388	109868488	.	-	.	gene_id "SE:1:109866895-109867845:109867940-109868388:-"; transcript_id "SE:1:109866895-109867845:109867940-109868388:-:alternative1";
1	hq_isoforms.fasta.no5merge.collapsed.gff	exon	110398657	110398757	.	-	.	gene_id "SE:1:110398757-110401567:110401708-110403775:-"; transcript_id "SE:1:110398757-110401567:110401708-110403775:-:alternative2";
1	hq_isoforms.fasta.no5merge.collapsed.gff	exon	110403775	110403875	.	-	.	gene_id "SE:1:110398757-110401567:110401708-110403775:-"; transcript_id "SE:1:110398757-110401567:110401708-110403775:-:alternative2";
1	hq_isoforms.fasta.no5merge.collapsed.gff	exon	110398657	110398757	.	-	.	gene_id "SE:1:110398757-110401567:110401708-110403775:-"; transcript_id "SE:1:110398757-110401567:110401708-110403775:-:alternative1";
1	hq_isoforms.fasta.no5merge.collapsed.gff	exon	110401567	110401708	.	-	.	gene_id "SE:1:110398757-110401567:110401708-110403775:-"; transcript_id "SE:1:110398757-110401567:110401708-110403775:-:alternative1";
1	hq_isoforms.fasta.no5merge.collapsed.gff	exon	110403775	110403875	.	-	.	gene_id "SE:1:110398757-110401567:110401708-110403775:-"; transcript_id "SE:1:110398757-110401567:110401708-110403775:-:alternative1";
1	hq_isoforms.fasta.no5merge.collapsed.gff	exon	111311540	111311640	.	-	.	gene_id "SE:1:111311640-111312337:111312396-111313185:-"; transcript_id "SE:1:111311640-111312337:111312396-111313185:-:alternative2";
1	hq_isoforms.fasta.no5merge.collapsed.gff	exon	111313185	111313285	.	-	.	gene_id "SE:1:111311640-111312337:111312396-111313185:-"; transcript_id "SE:1:111311640-111312337:111312396-111313185:-:alternative2";
1	hq_isoforms.fasta.no5merge.collapsed.gff	exon	111311540	111311640	.	-	.	gene_id "SE:1:111311640-111312337:111312396-111313185:-"; transcript_id "SE:1:111311640-111312337:111312396-111313185:-:alternative1";
1	hq_isoforms.fasta.no5merge.collapsed.gff	exon	111312337	111312396	.	-	.	gene_id "SE:1:111311640-111312337:111312396-111313185:-"; transcript_id "SE:1:111311640-111312337:111312396-111313185:-:alternative1";
1	hq_isoforms.fasta.no5merge.collapsed.gff	exon	111313185	111313285	.	-	.	gene_id "SE:1:111311640-111312337:111312396-111313185:-"; transcript_id "SE:1:111311640-111312337:111312396-111313185:-:alternative1";
1	hq_isoforms.fasta.no5merge.collapsed.gff	exon	114356065	114356165	.	-	.	gene_id "SE:1:114356165-114359273:114359359-114360860:-"; transcript_id "SE:1:114356165-114359273:114359359-114360860:-:alternative2";
1	hq_isoforms.fasta.no5merge.collapsed.gff	exon	114360860	114360960	.	-	.	gene_id "SE:1:114356165-114359273:114359359-114360860:-"; transcript_id "SE:1:114356165-114359273:114359359-114360860:-:alternative2";
1	hq_isoforms.fasta.no5merge.collapsed.gff	exon	114356065	114356165	.	-	.	gene_id "SE:1:114356165-114359273:114359359-114360860:-"; transcript_id "SE:1:114356165-114359273:114359359-114360860:-:alternative1";
1	hq_isoforms.fasta.no5merge.collapsed.gff	exon	114359273	114359359	.	-	.	gene_id "SE:1:114356165-114359273:114359359-114360860:-"; transcript_id "SE:1:114356165-114359273:114359359-114360860:-:alternative1";
1	hq_isoforms.fasta.no5merge.collapsed.gff	exon	114360860	114360960	.	-	.	gene_id "SE:1:114356165-114359273:114359359-114360860:-"; transcript_id "SE:1:114356165-114359273:114359359-114360860:-:alternative1";
1	hq_isoforms.fasta.no5merge.collapsed.gff	exon	114382136	114382236	.	-	.	gene_id "SE:1:114382236-114386450:114386456-114388506:-"; transcript_id "SE:1:114382236-114386450:114386456-114388506:-:alternative2";
1	hq_isoforms.fasta.no5merge.collapsed.gff	exon	114388506	114388606	.	-	.	gene_id "SE:1:114382236-114386450:114386456-114388506:-"; transcript_id "SE:1:114382236-114386450:114386456-114388506:-:alternative2";
1	hq_isoforms.fasta.no5merge.collapsed.gff	exon	114382136	114382236	.	-	.	gene_id "SE:1:114382236-114386450:114386456-114388506:-"; transcript_id "SE:1:114382236-114386450:114386456-114388506:-:alternative1";
1	hq_isoforms.fasta.no5merge.collapsed.gff	exon	114386450	114386456	.	-	.	gene_id "SE:1:114382236-114386450:114386456-114388506:-"; transcript_id "SE:1:114382236-114386450:114386456-114388506:-:alternative1";
1	hq_isoforms.fasta.no5merge.collapsed.gff	exon	114388506	114388606	.	-	.	gene_id "SE:1:114382236-114386450:114386456-114388506:-"; transcript_id "SE:1:114382236-114386450:114386456-114388506:-:alternative1";
1	hq_isoforms.fasta.no5merge.collapsed.gff	exon	114382136	114382236	.	-	.	gene_id "SE:1:114382236-114387879:114387991-114388506:-"; transcript_id "SE:1:114382236-114387879:114387991-114388506:-:alternative2";
1	hq_isoforms.fasta.no5merge.collapsed.gff	exon	114388506	114388606	.	-	.	gene_id "SE:1:114382236-114387879:114387991-114388506:-"; transcript_id "SE:1:114382236-114387879:114387991-114388506:-:alternative2";
1	hq_isoforms.fasta.no5merge.collapsed.gff	exon	114382136	114382236	.	-	.	gene_id "SE:1:114382236-114387879:114387991-114388506:-"; transcript_id "SE:1:114382236-114387879:114387991-114388506:-:alternative1";
1	hq_isoforms.fasta.no5merge.collapsed.gff	exon	114387879	114387991	.	-	.	gene_id "SE:1:114382236-114387879:114387991-114388506:-"; transcript_id "SE:1:114382236-114387879:114387991-114388506:-:alternative1";
1	hq_isoforms.fasta.no5merge.collapsed.gff	exon	114388506	114388606	.	-	.	gene_id "SE:1:114382236-114387879:114387991-114388506:-"; transcript_id "SE:1:114382236-114387879:114387991-114388506:-:alternative1";
1	hq_isoforms.fasta.no5merge.collapsed.gff	exon	114356065	114356165	.	-	.	gene_id "SE:1:114356165-114357274:114357344-114360860:-"; transcript_id "SE:1:114356165-114357274:114357344-114360860:-:alternative2";
1	hq_isoforms.fasta.no5merge.collapsed.gff	exon	114360860	114360960	.	-	.	gene_id "SE:1:114356165-114357274:114357344-114360860:-"; transcript_id "SE:1:114356165-114357274:114357344-114360860:-:alternative2";
1	hq_isoforms.fasta.no5merge.collapsed.gff	exon	114356065	114356165	.	-	.	gene_id "SE:1:114356165-114357274:114357344-114360860:-"; transcript_id "SE:1:114356165-114357274:114357344-114360860:-:alternative1";
1	hq_isoforms.fasta.no5merge.collapsed.gff	exon	114357274	114357344	.	-	.	gene_id "SE:1:114356165-114357274:114357344-114360860:-"; transcript_id "SE:1:114356165-114357274:114357344-114360860:-:alternative1";
1	hq_isoforms.fasta.no5merge.collapsed.gff	exon	114360860	114360960	.	-	.	gene_id "SE:1:114356165-114357274:114357344-114360860:-"; transcript_id "SE:1:114356165-114357274:114357344-114360860:-:alternative1";
1	hq_isoforms.fasta.no5merge.collapsed.gff	exon	114373615	114373715	.	-	.	gene_id "SE:1:114373715-114375941:114375958-114377088:-"; transcript_id "SE:1:114373715-114375941:114375958-114377088:-:alternative2";
1	hq_isoforms.fasta.no5merge.collapsed.gff	exon	114377088	114377188	.	-	.	gene_id "SE:1:114373715-114375941:114375958-114377088:-"; transcript_id "SE:1:114373715-114375941:114375958-114377088:-:alternative2";
1	hq_isoforms.fasta.no5merge.collapsed.gff	exon	114373615	114373715	.	-	.	gene_id "SE:1:114373715-114375941:114375958-114377088:-"; transcript_id "SE:1:114373715-114375941:114375958-114377088:-:alternative1";
1	hq_isoforms.fasta.no5merge.collapsed.gff	exon	114375941	114375958	.	-	.	gene_id "SE:1:114373715-114375941:114375958-114377088:-"; transcript_id "SE:1:114373715-114375941:114375958-114377088:-:alternative1";
1	hq_isoforms.fasta.no5merge.collapsed.gff	exon	114377088	114377188	.	-	.	gene_id "SE:1:114373715-114375941:114375958-114377088:-"; transcript_id "SE:1:114373715-114375941:114375958-114377088:-:alternative1";
1	hq_isoforms.fasta.no5merge.collapsed.gff	exon	114356065	114356165	.	-	.	gene_id "SE:1:114356165-114357274:114357344-114359273:-"; transcript_id "SE:1:114356165-114357274:114357344-114359273:-:alternative2";
1	hq_isoforms.fasta.no5merge.collapsed.gff	exon	114359273	114359373	.	-	.	gene_id "SE:1:114356165-114357274:114357344-114359273:-"; transcript_id "SE:1:114356165-114357274:114357344-114359273:-:alternative2";
1	hq_isoforms.fasta.no5merge.collapsed.gff	exon	114356065	114356165	.	-	.	gene_id "SE:1:114356165-114357274:114357344-114359273:-"; transcript_id "SE:1:114356165-114357274:114357344-114359273:-:alternative1";
1	hq_isoforms.fasta.no5merge.collapsed.gff	exon	114357274	114357344	.	-	.	gene_id "SE:1:114356165-114357274:114357344-114359273:-"; transcript_id "SE:1:114356165-114357274:114357344-114359273:-:alternative1";
1	hq_isoforms.fasta.no5merge.collapsed.gff	exon	114359273	114359373	.	-	.	gene_id "SE:1:114356165-114357274:114357344-114359273:-"; transcript_id "SE:1:114356165-114357274:114357344-114359273:-:alternative1";
1	hq_isoforms.fasta.no5merge.collapsed.gff	exon	114357244	114357344	.	-	.	gene_id "SE:1:114357344-114359273:114359359-114360860:-"; transcript_id "SE:1:114357344-114359273:114359359-114360860:-:alternative2";
1	hq_isoforms.fasta.no5merge.collapsed.gff	exon	114360860	114360960	.	-	.	gene_id "SE:1:114357344-114359273:114359359-114360860:-"; transcript_id "SE:1:114357344-114359273:114359359-114360860:-:alternative2";
1	hq_isoforms.fasta.no5merge.collapsed.gff	exon	114357244	114357344	.	-	.	gene_id "SE:1:114357344-114359273:114359359-114360860:-"; transcript_id "SE:1:114357344-114359273:114359359-114360860:-:alternative1";
1	hq_isoforms.fasta.no5merge.collapsed.gff	exon	114359273	114359359	.	-	.	gene_id "SE:1:114357344-114359273:114359359-114360860:-"; transcript_id "SE:1:114357344-114359273:114359359-114360860:-:alternative1";
1	hq_isoforms.fasta.no5merge.collapsed.gff	exon	114360860	114360960	.	-	.	gene_id "SE:1:114357344-114359273:114359359-114360860:-"; transcript_id "SE:1:114357344-114359273:114359359-114360860:-:alternative1";
1	hq_isoforms.fasta.no5merge.collapsed.gff	exon	117078024	117078124	.	-	.	gene_id "SE:1:117078124-117078864:117078971-117079278:-"; transcript_id "SE:1:117078124-117078864:117078971-117079278:-:alternative2";
1	hq_isoforms.fasta.no5merge.collapsed.gff	exon	117079278	117079378	.	-	.	gene_id "SE:1:117078124-117078864:117078971-117079278:-"; transcript_id "SE:1:117078124-117078864:117078971-117079278:-:alternative2";
1	hq_isoforms.fasta.no5merge.collapsed.gff	exon	117078024	117078124	.	-	.	gene_id "SE:1:117078124-117078864:117078971-117079278:-"; transcript_id "SE:1:117078124-117078864:117078971-117079278:-:alternative1";
1	hq_isoforms.fasta.no5merge.collapsed.gff	exon	117078864	117078971	.	-	.	gene_id "SE:1:117078124-117078864:117078971-117079278:-"; transcript_id "SE:1:117078124-117078864:117078971-117079278:-:alternative1";
1	hq_isoforms.fasta.no5merge.collapsed.gff	exon	117079278	117079378	.	-	.	gene_id "SE:1:117078124-117078864:117078971-117079278:-"; transcript_id "SE:1:117078124-117078864:117078971-117079278:-:alternative1";
1	hq_isoforms.fasta.no5merge.collapsed.gff	exon	116703826	116703926	.	-	.	gene_id "SE:1:116703926-116705166:116705252-116705835:-"; transcript_id "SE:1:116703926-116705166:116705252-116705835:-:alternative2";
1	hq_isoforms.fasta.no5merge.collapsed.gff	exon	116705835	116705935	.	-	.	gene_id "SE:1:116703926-116705166:116705252-116705835:-"; transcript_id "SE:1:116703926-116705166:116705252-116705835:-:alternative2";
1	hq_isoforms.fasta.no5merge.collapsed.gff	exon	116703826	116703926	.	-	.	gene_id "SE:1:116703926-116705166:116705252-116705835:-"; transcript_id "SE:1:116703926-116705166:116705252-116705835:-:alternative1";
1	hq_isoforms.fasta.no5merge.collapsed.gff	exon	116705166	116705252	.	-	.	gene_id "SE:1:116703926-116705166:116705252-116705835:-"; transcript_id "SE:1:116703926-116705166:116705252-116705835:-:alternative1";
1	hq_isoforms.fasta.no5merge.collapsed.gff	exon	116705835	116705935	.	-	.	gene_id "SE:1:116703926-116705166:116705252-116705835:-"; transcript_id "SE:1:116703926-116705166:116705252-116705835:-:alternative1";
1	hq_isoforms.fasta.no5merge.collapsed.gff	exon	116841442	116841542	.	-	.	gene_id "SE:1:116841542-116843256:116843440-116850629:-"; transcript_id "SE:1:116841542-116843256:116843440-116850629:-:alternative2";
1	hq_isoforms.fasta.no5merge.collapsed.gff	exon	116850629	116850729	.	-	.	gene_id "SE:1:116841542-116843256:116843440-116850629:-"; transcript_id "SE:1:116841542-116843256:116843440-116850629:-:alternative2";
1	hq_isoforms.fasta.no5merge.collapsed.gff	exon	116841442	116841542	.	-	.	gene_id "SE:1:116841542-116843256:116843440-116850629:-"; transcript_id "SE:1:116841542-116843256:116843440-116850629:-:alternative1";
1	hq_isoforms.fasta.no5merge.collapsed.gff	exon	116843256	116843440	.	-	.	gene_id "SE:1:116841542-116843256:116843440-116850629:-"; transcript_id "SE:1:116841542-116843256:116843440-116850629:-:alternative1";
1	hq_isoforms.fasta.no5merge.collapsed.gff	exon	116850629	116850729	.	-	.	gene_id "SE:1:116841542-116843256:116843440-116850629:-"; transcript_id "SE:1:116841542-116843256:116843440-116850629:-:alternative1";
1	hq_isoforms.fasta.no5merge.collapsed.gff	exon	117873516	117873616	.	-	.	gene_id "SE:1:117873616-117876191:117876294-117880121:-"; transcript_id "SE:1:117873616-117876191:117876294-117880121:-:alternative2";
1	hq_isoforms.fasta.no5merge.collapsed.gff	exon	117880121	117880221	.	-	.	gene_id "SE:1:117873616-117876191:117876294-117880121:-"; transcript_id "SE:1:117873616-117876191:117876294-117880121:-:alternative2";
1	hq_isoforms.fasta.no5merge.collapsed.gff	exon	117873516	117873616	.	-	.	gene_id "SE:1:117873616-117876191:117876294-117880121:-"; transcript_id "SE:1:117873616-117876191:117876294-117880121:-:alternative1";
1	hq_isoforms.fasta.no5merge.collapsed.gff	exon	117876191	117876294	.	-	.	gene_id "SE:1:117873616-117876191:117876294-117880121:-"; transcript_id "SE:1:117873616-117876191:117876294-117880121:-:alternative1";
1	hq_isoforms.fasta.no5merge.collapsed.gff	exon	117880121	117880221	.	-	.	gene_id "SE:1:117873616-117876191:117876294-117880121:-"; transcript_id "SE:1:117873616-117876191:117876294-117880121:-:alternative1";
1	hq_isoforms.fasta.no5merge.collapsed.gff	exon	117857586	117857686	.	-	.	gene_id "SE:1:117857686-117863627:117863691-117863822:-"; transcript_id "SE:1:117857686-117863627:117863691-117863822:-:alternative2";
1	hq_isoforms.fasta.no5merge.collapsed.gff	exon	117863822	117863922	.	-	.	gene_id "SE:1:117857686-117863627:117863691-117863822:-"; transcript_id "SE:1:117857686-117863627:117863691-117863822:-:alternative2";
1	hq_isoforms.fasta.no5merge.collapsed.gff	exon	117857586	117857686	.	-	.	gene_id "SE:1:117857686-117863627:117863691-117863822:-"; transcript_id "SE:1:117857686-117863627:117863691-117863822:-:alternative1";
1	hq_isoforms.fasta.no5merge.collapsed.gff	exon	117863627	117863691	.	-	.	gene_id "SE:1:117857686-117863627:117863691-117863822:-"; transcript_id "SE:1:117857686-117863627:117863691-117863822:-:alternative1";
1	hq_isoforms.fasta.no5merge.collapsed.gff	exon	117863822	117863922	.	-	.	gene_id "SE:1:117857686-117863627:117863691-117863822:-"; transcript_id "SE:1:117857686-117863627:117863691-117863822:-:alternative1";
1	hq_isoforms.fasta.no5merge.collapsed.gff	exon	117863917	117864017	.	-	.	gene_id "SE:1:117864017-117864530:117864717-117865988:-"; transcript_id "SE:1:117864017-117864530:117864717-117865988:-:alternative2";
1	hq_isoforms.fasta.no5merge.collapsed.gff	exon	117865988	117866088	.	-	.	gene_id "SE:1:117864017-117864530:117864717-117865988:-"; transcript_id "SE:1:117864017-117864530:117864717-117865988:-:alternative2";
1	hq_isoforms.fasta.no5merge.collapsed.gff	exon	117863917	117864017	.	-	.	gene_id "SE:1:117864017-117864530:117864717-117865988:-"; transcript_id "SE:1:117864017-117864530:117864717-117865988:-:alternative1";
1	hq_isoforms.fasta.no5merge.collapsed.gff	exon	117864530	117864717	.	-	.	gene_id "SE:1:117864017-117864530:117864717-117865988:-"; transcript_id "SE:1:117864017-117864530:117864717-117865988:-:alternative1";
1	hq_isoforms.fasta.no5merge.collapsed.gff	exon	117865988	117866088	.	-	.	gene_id "SE:1:117864017-117864530:117864717-117865988:-"; transcript_id "SE:1:117864017-117864530:117864717-117865988:-:alternative1";
1	hq_isoforms.fasta.no5merge.collapsed.gff	exon	118041599	118041699	.	-	.	gene_id "SE:1:118041699-118043321:118043410-118046657:-"; transcript_id "SE:1:118041699-118043321:118043410-118046657:-:alternative2";
1	hq_isoforms.fasta.no5merge.collapsed.gff	exon	118046657	118046757	.	-	.	gene_id "SE:1:118041699-118043321:118043410-118046657:-"; transcript_id "SE:1:118041699-118043321:118043410-118046657:-:alternative2";
1	hq_isoforms.fasta.no5merge.collapsed.gff	exon	118041599	118041699	.	-	.	gene_id "SE:1:118041699-118043321:118043410-118046657:-"; transcript_id "SE:1:118041699-118043321:118043410-118046657:-:alternative1";
1	hq_isoforms.fasta.no5merge.collapsed.gff	exon	118043321	118043410	.	-	.	gene_id "SE:1:118041699-118043321:118043410-118046657:-"; transcript_id "SE:1:118041699-118043321:118043410-118046657:-:alternative1";
1	hq_isoforms.fasta.no5merge.collapsed.gff	exon	118046657	118046757	.	-	.	gene_id "SE:1:118041699-118043321:118043410-118046657:-"; transcript_id "SE:1:118041699-118043321:118043410-118046657:-:alternative1";
1	hq_isoforms.fasta.no5merge.collapsed.gff	exon	118059724	118059824	.	-	.	gene_id "SE:1:118059824-118075704:118075772-118081036:-"; transcript_id "SE:1:118059824-118075704:118075772-118081036:-:alternative2";
1	hq_isoforms.fasta.no5merge.collapsed.gff	exon	118081036	118081136	.	-	.	gene_id "SE:1:118059824-118075704:118075772-118081036:-"; transcript_id "SE:1:118059824-118075704:118075772-118081036:-:alternative2";
1	hq_isoforms.fasta.no5merge.collapsed.gff	exon	118059724	118059824	.	-	.	gene_id "SE:1:118059824-118075704:118075772-118081036:-"; transcript_id "SE:1:118059824-118075704:118075772-118081036:-:alternative1";
1	hq_isoforms.fasta.no5merge.collapsed.gff	exon	118075704	118075772	.	-	.	gene_id "SE:1:118059824-118075704:118075772-118081036:-"; transcript_id "SE:1:118059824-118075704:118075772-118081036:-:alternative1";
1	hq_isoforms.fasta.no5merge.collapsed.gff	exon	118081036	118081136	.	-	.	gene_id "SE:1:118059824-118075704:118075772-118081036:-"; transcript_id "SE:1:118059824-118075704:118075772-118081036:-:alternative1";
1	hq_isoforms.fasta.no5merge.collapsed.gff	exon	121103995	121104095	.	-	.	gene_id "SE:1:121104095-121108104:121108457-121108858:-"; transcript_id "SE:1:121104095-121108104:121108457-121108858:-:alternative2";
1	hq_isoforms.fasta.no5merge.collapsed.gff	exon	121108858	121108958	.	-	.	gene_id "SE:1:121104095-121108104:121108457-121108858:-"; transcript_id "SE:1:121104095-121108104:121108457-121108858:-:alternative2";
1	hq_isoforms.fasta.no5merge.collapsed.gff	exon	121103995	121104095	.	-	.	gene_id "SE:1:121104095-121108104:121108457-121108858:-"; transcript_id "SE:1:121104095-121108104:121108457-121108858:-:alternative1";
1	hq_isoforms.fasta.no5merge.collapsed.gff	exon	121108104	121108457	.	-	.	gene_id "SE:1:121104095-121108104:121108457-121108858:-"; transcript_id "SE:1:121104095-121108104:121108457-121108858:-:alternative1";
1	hq_isoforms.fasta.no5merge.collapsed.gff	exon	121108858	121108958	.	-	.	gene_id "SE:1:121104095-121108104:121108457-121108858:-"; transcript_id "SE:1:121104095-121108104:121108457-121108858:-:alternative1";
1	hq_isoforms.fasta.no5merge.collapsed.gff	exon	121116059	121116159	.	-	.	gene_id "SE:1:121116159-121116620:121116673-121117375:-"; transcript_id "SE:1:121116159-121116620:121116673-121117375:-:alternative2";
1	hq_isoforms.fasta.no5merge.collapsed.gff	exon	121117375	121117475	.	-	.	gene_id "SE:1:121116159-121116620:121116673-121117375:-"; transcript_id "SE:1:121116159-121116620:121116673-121117375:-:alternative2";
1	hq_isoforms.fasta.no5merge.collapsed.gff	exon	121116059	121116159	.	-	.	gene_id "SE:1:121116159-121116620:121116673-121117375:-"; transcript_id "SE:1:121116159-121116620:121116673-121117375:-:alternative1";
1	hq_isoforms.fasta.no5merge.collapsed.gff	exon	121116620	121116673	.	-	.	gene_id "SE:1:121116159-121116620:121116673-121117375:-"; transcript_id "SE:1:121116159-121116620:121116673-121117375:-:alternative1";
1	hq_isoforms.fasta.no5merge.collapsed.gff	exon	121117375	121117475	.	-	.	gene_id "SE:1:121116159-121116620:121116673-121117375:-"; transcript_id "SE:1:121116159-121116620:121116673-121117375:-:alternative1";
1	hq_isoforms.fasta.no5merge.collapsed.gff	exon	121314018	121314118	.	-	.	gene_id "SE:1:121314118-121320249:121320364-121320661:-"; transcript_id "SE:1:121314118-121320249:121320364-121320661:-:alternative2";
1	hq_isoforms.fasta.no5merge.collapsed.gff	exon	121320661	121320761	.	-	.	gene_id "SE:1:121314118-121320249:121320364-121320661:-"; transcript_id "SE:1:121314118-121320249:121320364-121320661:-:alternative2";
1	hq_isoforms.fasta.no5merge.collapsed.gff	exon	121314018	121314118	.	-	.	gene_id "SE:1:121314118-121320249:121320364-121320661:-"; transcript_id "SE:1:121314118-121320249:121320364-121320661:-:alternative1";
1	hq_isoforms.fasta.no5merge.collapsed.gff	exon	121320249	121320364	.	-	.	gene_id "SE:1:121314118-121320249:121320364-121320661:-"; transcript_id "SE:1:121314118-121320249:121320364-121320661:-:alternative1";
1	hq_isoforms.fasta.no5merge.collapsed.gff	exon	121320661	121320761	.	-	.	gene_id "SE:1:121314118-121320249:121320364-121320661:-"; transcript_id "SE:1:121314118-121320249:121320364-121320661:-:alternative1";
1	hq_isoforms.fasta.no5merge.collapsed.gff	exon	121590213	121590313	.	-	.	gene_id "SE:1:121590313-121594482:121594550-121600412:-"; transcript_id "SE:1:121590313-121594482:121594550-121600412:-:alternative2";
1	hq_isoforms.fasta.no5merge.collapsed.gff	exon	121600412	121600512	.	-	.	gene_id "SE:1:121590313-121594482:121594550-121600412:-"; transcript_id "SE:1:121590313-121594482:121594550-121600412:-:alternative2";
1	hq_isoforms.fasta.no5merge.collapsed.gff	exon	121590213	121590313	.	-	.	gene_id "SE:1:121590313-121594482:121594550-121600412:-"; transcript_id "SE:1:121590313-121594482:121594550-121600412:-:alternative1";
1	hq_isoforms.fasta.no5merge.collapsed.gff	exon	121594482	121594550	.	-	.	gene_id "SE:1:121590313-121594482:121594550-121600412:-"; transcript_id "SE:1:121590313-121594482:121594550-121600412:-:alternative1";
1	hq_isoforms.fasta.no5merge.collapsed.gff	exon	121600412	121600512	.	-	.	gene_id "SE:1:121590313-121594482:121594550-121600412:-"; transcript_id "SE:1:121590313-121594482:121594550-121600412:-:alternative1";
1	hq_isoforms.fasta.no5merge.collapsed.gff	exon	121590213	121590313	.	-	.	gene_id "SE:1:121590313-121593081:121593116-121594482:-"; transcript_id "SE:1:121590313-121593081:121593116-121594482:-:alternative2";
1	hq_isoforms.fasta.no5merge.collapsed.gff	exon	121594482	121594582	.	-	.	gene_id "SE:1:121590313-121593081:121593116-121594482:-"; transcript_id "SE:1:121590313-121593081:121593116-121594482:-:alternative2";
1	hq_isoforms.fasta.no5merge.collapsed.gff	exon	121590213	121590313	.	-	.	gene_id "SE:1:121590313-121593081:121593116-121594482:-"; transcript_id "SE:1:121590313-121593081:121593116-121594482:-:alternative1";
1	hq_isoforms.fasta.no5merge.collapsed.gff	exon	121593081	121593116	.	-	.	gene_id "SE:1:121590313-121593081:121593116-121594482:-"; transcript_id "SE:1:121590313-121593081:121593116-121594482:-:alternative1";
1	hq_isoforms.fasta.no5merge.collapsed.gff	exon	121594482	121594582	.	-	.	gene_id "SE:1:121590313-121593081:121593116-121594482:-"; transcript_id "SE:1:121590313-121593081:121593116-121594482:-:alternative1";
1	hq_isoforms.fasta.no5merge.collapsed.gff	exon	121593016	121593116	.	-	.	gene_id "SE:1:121593116-121594482:121594550-121600412:-"; transcript_id "SE:1:121593116-121594482:121594550-121600412:-:alternative2";
1	hq_isoforms.fasta.no5merge.collapsed.gff	exon	121600412	121600512	.	-	.	gene_id "SE:1:121593116-121594482:121594550-121600412:-"; transcript_id "SE:1:121593116-121594482:121594550-121600412:-:alternative2";
1	hq_isoforms.fasta.no5merge.collapsed.gff	exon	121593016	121593116	.	-	.	gene_id "SE:1:121593116-121594482:121594550-121600412:-"; transcript_id "SE:1:121593116-121594482:121594550-121600412:-:alternative1";
1	hq_isoforms.fasta.no5merge.collapsed.gff	exon	121594482	121594550	.	-	.	gene_id "SE:1:121593116-121594482:121594550-121600412:-"; transcript_id "SE:1:121593116-121594482:121594550-121600412:-:alternative1";
1	hq_isoforms.fasta.no5merge.collapsed.gff	exon	121600412	121600512	.	-	.	gene_id "SE:1:121593116-121594482:121594550-121600412:-"; transcript_id "SE:1:121593116-121594482:121594550-121600412:-:alternative1";
1	hq_isoforms.fasta.no5merge.collapsed.gff	exon	121590213	121590313	.	-	.	gene_id "SE:1:121590313-121593081:121593116-121600412:-"; transcript_id "SE:1:121590313-121593081:121593116-121600412:-:alternative2";
1	hq_isoforms.fasta.no5merge.collapsed.gff	exon	121600412	121600512	.	-	.	gene_id "SE:1:121590313-121593081:121593116-121600412:-"; transcript_id "SE:1:121590313-121593081:121593116-121600412:-:alternative2";
1	hq_isoforms.fasta.no5merge.collapsed.gff	exon	121590213	121590313	.	-	.	gene_id "SE:1:121590313-121593081:121593116-121600412:-"; transcript_id "SE:1:121590313-121593081:121593116-121600412:-:alternative1";
1	hq_isoforms.fasta.no5merge.collapsed.gff	exon	121593081	121593116	.	-	.	gene_id "SE:1:121590313-121593081:121593116-121600412:-"; transcript_id "SE:1:121590313-121593081:121593116-121600412:-:alternative1";
1	hq_isoforms.fasta.no5merge.collapsed.gff	exon	121600412	121600512	.	-	.	gene_id "SE:1:121590313-121593081:121593116-121600412:-"; transcript_id "SE:1:121590313-121593081:121593116-121600412:-:alternative1";
1	hq_isoforms.fasta.no5merge.collapsed.gff	exon	122503258	122503358	.	-	.	gene_id "SE:1:122503358-122509460:122509535-122511382:-"; transcript_id "SE:1:122503358-122509460:122509535-122511382:-:alternative2";
1	hq_isoforms.fasta.no5merge.collapsed.gff	exon	122511382	122511482	.	-	.	gene_id "SE:1:122503358-122509460:122509535-122511382:-"; transcript_id "SE:1:122503358-122509460:122509535-122511382:-:alternative2";
1	hq_isoforms.fasta.no5merge.collapsed.gff	exon	122503258	122503358	.	-	.	gene_id "SE:1:122503358-122509460:122509535-122511382:-"; transcript_id "SE:1:122503358-122509460:122509535-122511382:-:alternative1";
1	hq_isoforms.fasta.no5merge.collapsed.gff	exon	122509460	122509535	.	-	.	gene_id "SE:1:122503358-122509460:122509535-122511382:-"; transcript_id "SE:1:122503358-122509460:122509535-122511382:-:alternative1";
1	hq_isoforms.fasta.no5merge.collapsed.gff	exon	122511382	122511482	.	-	.	gene_id "SE:1:122503358-122509460:122509535-122511382:-"; transcript_id "SE:1:122503358-122509460:122509535-122511382:-:alternative1";
1	hq_isoforms.fasta.no5merge.collapsed.gff	exon	122503258	122503358	.	-	.	gene_id "SE:1:122503358-122507140:122507269-122509460:-"; transcript_id "SE:1:122503358-122507140:122507269-122509460:-:alternative2";
1	hq_isoforms.fasta.no5merge.collapsed.gff	exon	122509460	122509560	.	-	.	gene_id "SE:1:122503358-122507140:122507269-122509460:-"; transcript_id "SE:1:122503358-122507140:122507269-122509460:-:alternative2";
1	hq_isoforms.fasta.no5merge.collapsed.gff	exon	122503258	122503358	.	-	.	gene_id "SE:1:122503358-122507140:122507269-122509460:-"; transcript_id "SE:1:122503358-122507140:122507269-122509460:-:alternative1";
1	hq_isoforms.fasta.no5merge.collapsed.gff	exon	122507140	122507269	.	-	.	gene_id "SE:1:122503358-122507140:122507269-122509460:-"; transcript_id "SE:1:122503358-122507140:122507269-122509460:-:alternative1";
1	hq_isoforms.fasta.no5merge.collapsed.gff	exon	122509460	122509560	.	-	.	gene_id "SE:1:122503358-122507140:122507269-122509460:-"; transcript_id "SE:1:122503358-122507140:122507269-122509460:-:alternative1";
1	hq_isoforms.fasta.no5merge.collapsed.gff	exon	122737659	122737759	.	-	.	gene_id "SE:1:122737759-122741746:122742010-122745317:-"; transcript_id "SE:1:122737759-122741746:122742010-122745317:-:alternative2";
1	hq_isoforms.fasta.no5merge.collapsed.gff	exon	122745317	122745417	.	-	.	gene_id "SE:1:122737759-122741746:122742010-122745317:-"; transcript_id "SE:1:122737759-122741746:122742010-122745317:-:alternative2";
1	hq_isoforms.fasta.no5merge.collapsed.gff	exon	122737659	122737759	.	-	.	gene_id "SE:1:122737759-122741746:122742010-122745317:-"; transcript_id "SE:1:122737759-122741746:122742010-122745317:-:alternative1";
1	hq_isoforms.fasta.no5merge.collapsed.gff	exon	122741746	122742010	.	-	.	gene_id "SE:1:122737759-122741746:122742010-122745317:-"; transcript_id "SE:1:122737759-122741746:122742010-122745317:-:alternative1";
1	hq_isoforms.fasta.no5merge.collapsed.gff	exon	122745317	122745417	.	-	.	gene_id "SE:1:122737759-122741746:122742010-122745317:-"; transcript_id "SE:1:122737759-122741746:122742010-122745317:-:alternative1";
1	hq_isoforms.fasta.no5merge.collapsed.gff	exon	123864711	123864811	.	-	.	gene_id "SE:1:123864811-123865301:123865400-123866879:-"; transcript_id "SE:1:123864811-123865301:123865400-123866879:-:alternative2";
1	hq_isoforms.fasta.no5merge.collapsed.gff	exon	123866879	123866979	.	-	.	gene_id "SE:1:123864811-123865301:123865400-123866879:-"; transcript_id "SE:1:123864811-123865301:123865400-123866879:-:alternative2";
1	hq_isoforms.fasta.no5merge.collapsed.gff	exon	123864711	123864811	.	-	.	gene_id "SE:1:123864811-123865301:123865400-123866879:-"; transcript_id "SE:1:123864811-123865301:123865400-123866879:-:alternative1";
1	hq_isoforms.fasta.no5merge.collapsed.gff	exon	123865301	123865400	.	-	.	gene_id "SE:1:123864811-123865301:123865400-123866879:-"; transcript_id "SE:1:123864811-123865301:123865400-123866879:-:alternative1";
1	hq_isoforms.fasta.no5merge.collapsed.gff	exon	123866879	123866979	.	-	.	gene_id "SE:1:123864811-123865301:123865400-123866879:-"; transcript_id "SE:1:123864811-123865301:123865400-123866879:-:alternative1";
1	hq_isoforms.fasta.no5merge.collapsed.gff	exon	123975014	123975114	.	-	.	gene_id "SE:1:123975114-123978492:123978562-123979379:-"; transcript_id "SE:1:123975114-123978492:123978562-123979379:-:alternative2";
1	hq_isoforms.fasta.no5merge.collapsed.gff	exon	123979379	123979479	.	-	.	gene_id "SE:1:123975114-123978492:123978562-123979379:-"; transcript_id "SE:1:123975114-123978492:123978562-123979379:-:alternative2";
1	hq_isoforms.fasta.no5merge.collapsed.gff	exon	123975014	123975114	.	-	.	gene_id "SE:1:123975114-123978492:123978562-123979379:-"; transcript_id "SE:1:123975114-123978492:123978562-123979379:-:alternative1";
1	hq_isoforms.fasta.no5merge.collapsed.gff	exon	123978492	123978562	.	-	.	gene_id "SE:1:123975114-123978492:123978562-123979379:-"; transcript_id "SE:1:123975114-123978492:123978562-123979379:-:alternative1";
1	hq_isoforms.fasta.no5merge.collapsed.gff	exon	123979379	123979479	.	-	.	gene_id "SE:1:123975114-123978492:123978562-123979379:-"; transcript_id "SE:1:123975114-123978492:123978562-123979379:-:alternative1";
1	hq_isoforms.fasta.no5merge.collapsed.gff	exon	124025129	124025229	.	-	.	gene_id "SE:1:124025229-124028332:124028415-124033597:-"; transcript_id "SE:1:124025229-124028332:124028415-124033597:-:alternative2";
1	hq_isoforms.fasta.no5merge.collapsed.gff	exon	124033597	124033697	.	-	.	gene_id "SE:1:124025229-124028332:124028415-124033597:-"; transcript_id "SE:1:124025229-124028332:124028415-124033597:-:alternative2";
1	hq_isoforms.fasta.no5merge.collapsed.gff	exon	124025129	124025229	.	-	.	gene_id "SE:1:124025229-124028332:124028415-124033597:-"; transcript_id "SE:1:124025229-124028332:124028415-124033597:-:alternative1";
1	hq_isoforms.fasta.no5merge.collapsed.gff	exon	124028332	124028415	.	-	.	gene_id "SE:1:124025229-124028332:124028415-124033597:-"; transcript_id "SE:1:124025229-124028332:124028415-124033597:-:alternative1";
1	hq_isoforms.fasta.no5merge.collapsed.gff	exon	124033597	124033697	.	-	.	gene_id "SE:1:124025229-124028332:124028415-124033597:-"; transcript_id "SE:1:124025229-124028332:124028415-124033597:-:alternative1";
1	hq_isoforms.fasta.no5merge.collapsed.gff	exon	124028315	124028415	.	-	.	gene_id "SE:1:124028415-124030448:124030486-124033597:-"; transcript_id "SE:1:124028415-124030448:124030486-124033597:-:alternative2";
1	hq_isoforms.fasta.no5merge.collapsed.gff	exon	124033597	124033697	.	-	.	gene_id "SE:1:124028415-124030448:124030486-124033597:-"; transcript_id "SE:1:124028415-124030448:124030486-124033597:-:alternative2";
1	hq_isoforms.fasta.no5merge.collapsed.gff	exon	124028315	124028415	.	-	.	gene_id "SE:1:124028415-124030448:124030486-124033597:-"; transcript_id "SE:1:124028415-124030448:124030486-124033597:-:alternative1";
1	hq_isoforms.fasta.no5merge.collapsed.gff	exon	124030448	124030486	.	-	.	gene_id "SE:1:124028415-124030448:124030486-124033597:-"; transcript_id "SE:1:124028415-124030448:124030486-124033597:-:alternative1";
1	hq_isoforms.fasta.no5merge.collapsed.gff	exon	124033597	124033697	.	-	.	gene_id "SE:1:124028415-124030448:124030486-124033597:-"; transcript_id "SE:1:124028415-124030448:124030486-124033597:-:alternative1";
1	hq_isoforms.fasta.no5merge.collapsed.gff	exon	125096463	125096563	.	-	.	gene_id "SE:1:125096563-125097849:125097863-125099250:-"; transcript_id "SE:1:125096563-125097849:125097863-125099250:-:alternative2";
1	hq_isoforms.fasta.no5merge.collapsed.gff	exon	125099250	125099350	.	-	.	gene_id "SE:1:125096563-125097849:125097863-125099250:-"; transcript_id "SE:1:125096563-125097849:125097863-125099250:-:alternative2";
1	hq_isoforms.fasta.no5merge.collapsed.gff	exon	125096463	125096563	.	-	.	gene_id "SE:1:125096563-125097849:125097863-125099250:-"; transcript_id "SE:1:125096563-125097849:125097863-125099250:-:alternative1";
1	hq_isoforms.fasta.no5merge.collapsed.gff	exon	125097849	125097863	.	-	.	gene_id "SE:1:125096563-125097849:125097863-125099250:-"; transcript_id "SE:1:125096563-125097849:125097863-125099250:-:alternative1";
1	hq_isoforms.fasta.no5merge.collapsed.gff	exon	125099250	125099350	.	-	.	gene_id "SE:1:125096563-125097849:125097863-125099250:-"; transcript_id "SE:1:125096563-125097849:125097863-125099250:-:alternative1";
1	hq_isoforms.fasta.no5merge.collapsed.gff	exon	125350590	125350690	.	-	.	gene_id "SE:1:125350690-125350959:125351060-125354145:-"; transcript_id "SE:1:125350690-125350959:125351060-125354145:-:alternative2";
1	hq_isoforms.fasta.no5merge.collapsed.gff	exon	125354145	125354245	.	-	.	gene_id "SE:1:125350690-125350959:125351060-125354145:-"; transcript_id "SE:1:125350690-125350959:125351060-125354145:-:alternative2";
1	hq_isoforms.fasta.no5merge.collapsed.gff	exon	125350590	125350690	.	-	.	gene_id "SE:1:125350690-125350959:125351060-125354145:-"; transcript_id "SE:1:125350690-125350959:125351060-125354145:-:alternative1";
1	hq_isoforms.fasta.no5merge.collapsed.gff	exon	125350959	125351060	.	-	.	gene_id "SE:1:125350690-125350959:125351060-125354145:-"; transcript_id "SE:1:125350690-125350959:125351060-125354145:-:alternative1";
1	hq_isoforms.fasta.no5merge.collapsed.gff	exon	125354145	125354245	.	-	.	gene_id "SE:1:125350690-125350959:125351060-125354145:-"; transcript_id "SE:1:125350690-125350959:125351060-125354145:-:alternative1";
1	hq_isoforms.fasta.no5merge.collapsed.gff	exon	125361141	125361241	.	-	.	gene_id "SE:1:125361241-125362629:125362721-125365287:-"; transcript_id "SE:1:125361241-125362629:125362721-125365287:-:alternative2";
1	hq_isoforms.fasta.no5merge.collapsed.gff	exon	125365287	125365387	.	-	.	gene_id "SE:1:125361241-125362629:125362721-125365287:-"; transcript_id "SE:1:125361241-125362629:125362721-125365287:-:alternative2";
1	hq_isoforms.fasta.no5merge.collapsed.gff	exon	125361141	125361241	.	-	.	gene_id "SE:1:125361241-125362629:125362721-125365287:-"; transcript_id "SE:1:125361241-125362629:125362721-125365287:-:alternative1";
1	hq_isoforms.fasta.no5merge.collapsed.gff	exon	125362629	125362721	.	-	.	gene_id "SE:1:125361241-125362629:125362721-125365287:-"; transcript_id "SE:1:125361241-125362629:125362721-125365287:-:alternative1";
1	hq_isoforms.fasta.no5merge.collapsed.gff	exon	125365287	125365387	.	-	.	gene_id "SE:1:125361241-125362629:125362721-125365287:-"; transcript_id "SE:1:125361241-125362629:125362721-125365287:-:alternative1";
1	hq_isoforms.fasta.no5merge.collapsed.gff	exon	125709628	125709728	.	-	.	gene_id "SE:1:125709728-125711401:125711577-125713147:-"; transcript_id "SE:1:125709728-125711401:125711577-125713147:-:alternative2";
1	hq_isoforms.fasta.no5merge.collapsed.gff	exon	125713147	125713247	.	-	.	gene_id "SE:1:125709728-125711401:125711577-125713147:-"; transcript_id "SE:1:125709728-125711401:125711577-125713147:-:alternative2";
1	hq_isoforms.fasta.no5merge.collapsed.gff	exon	125709628	125709728	.	-	.	gene_id "SE:1:125709728-125711401:125711577-125713147:-"; transcript_id "SE:1:125709728-125711401:125711577-125713147:-:alternative1";
1	hq_isoforms.fasta.no5merge.collapsed.gff	exon	125711401	125711577	.	-	.	gene_id "SE:1:125709728-125711401:125711577-125713147:-"; transcript_id "SE:1:125709728-125711401:125711577-125713147:-:alternative1";
1	hq_isoforms.fasta.no5merge.collapsed.gff	exon	125713147	125713247	.	-	.	gene_id "SE:1:125709728-125711401:125711577-125713147:-"; transcript_id "SE:1:125709728-125711401:125711577-125713147:-:alternative1";
1	hq_isoforms.fasta.no5merge.collapsed.gff	exon	126091432	126091532	.	-	.	gene_id "SE:1:126091532-126093584:126093635-126094674:-"; transcript_id "SE:1:126091532-126093584:126093635-126094674:-:alternative2";
1	hq_isoforms.fasta.no5merge.collapsed.gff	exon	126094674	126094774	.	-	.	gene_id "SE:1:126091532-126093584:126093635-126094674:-"; transcript_id "SE:1:126091532-126093584:126093635-126094674:-:alternative2";
1	hq_isoforms.fasta.no5merge.collapsed.gff	exon	126091432	126091532	.	-	.	gene_id "SE:1:126091532-126093584:126093635-126094674:-"; transcript_id "SE:1:126091532-126093584:126093635-126094674:-:alternative1";
1	hq_isoforms.fasta.no5merge.collapsed.gff	exon	126093584	126093635	.	-	.	gene_id "SE:1:126091532-126093584:126093635-126094674:-"; transcript_id "SE:1:126091532-126093584:126093635-126094674:-:alternative1";
1	hq_isoforms.fasta.no5merge.collapsed.gff	exon	126094674	126094774	.	-	.	gene_id "SE:1:126091532-126093584:126093635-126094674:-"; transcript_id "SE:1:126091532-126093584:126093635-126094674:-:alternative1";
1	hq_isoforms.fasta.no5merge.collapsed.gff	exon	126474293	126474393	.	-	.	gene_id "SE:1:126474393-126477622:126477973-126497932:-"; transcript_id "SE:1:126474393-126477622:126477973-126497932:-:alternative2";
1	hq_isoforms.fasta.no5merge.collapsed.gff	exon	126497932	126498032	.	-	.	gene_id "SE:1:126474393-126477622:126477973-126497932:-"; transcript_id "SE:1:126474393-126477622:126477973-126497932:-:alternative2";
1	hq_isoforms.fasta.no5merge.collapsed.gff	exon	126474293	126474393	.	-	.	gene_id "SE:1:126474393-126477622:126477973-126497932:-"; transcript_id "SE:1:126474393-126477622:126477973-126497932:-:alternative1";
1	hq_isoforms.fasta.no5merge.collapsed.gff	exon	126477622	126477973	.	-	.	gene_id "SE:1:126474393-126477622:126477973-126497932:-"; transcript_id "SE:1:126474393-126477622:126477973-126497932:-:alternative1";
1	hq_isoforms.fasta.no5merge.collapsed.gff	exon	126497932	126498032	.	-	.	gene_id "SE:1:126474393-126477622:126477973-126497932:-"; transcript_id "SE:1:126474393-126477622:126477973-126497932:-:alternative1";
1	hq_isoforms.fasta.no5merge.collapsed.gff	exon	127193999	127194099	.	-	.	gene_id "SE:1:127194099-127219053:127219172-127221035:-"; transcript_id "SE:1:127194099-127219053:127219172-127221035:-:alternative2";
1	hq_isoforms.fasta.no5merge.collapsed.gff	exon	127221035	127221135	.	-	.	gene_id "SE:1:127194099-127219053:127219172-127221035:-"; transcript_id "SE:1:127194099-127219053:127219172-127221035:-:alternative2";
1	hq_isoforms.fasta.no5merge.collapsed.gff	exon	127193999	127194099	.	-	.	gene_id "SE:1:127194099-127219053:127219172-127221035:-"; transcript_id "SE:1:127194099-127219053:127219172-127221035:-:alternative1";
1	hq_isoforms.fasta.no5merge.collapsed.gff	exon	127219053	127219172	.	-	.	gene_id "SE:1:127194099-127219053:127219172-127221035:-"; transcript_id "SE:1:127194099-127219053:127219172-127221035:-:alternative1";
1	hq_isoforms.fasta.no5merge.collapsed.gff	exon	127221035	127221135	.	-	.	gene_id "SE:1:127194099-127219053:127219172-127221035:-"; transcript_id "SE:1:127194099-127219053:127219172-127221035:-:alternative1";
1	hq_isoforms.fasta.no5merge.collapsed.gff	exon	127736615	127736715	.	-	.	gene_id "SE:1:127736715-127737394:127737421-127737507:-"; transcript_id "SE:1:127736715-127737394:127737421-127737507:-:alternative2";
1	hq_isoforms.fasta.no5merge.collapsed.gff	exon	127737507	127737607	.	-	.	gene_id "SE:1:127736715-127737394:127737421-127737507:-"; transcript_id "SE:1:127736715-127737394:127737421-127737507:-:alternative2";
1	hq_isoforms.fasta.no5merge.collapsed.gff	exon	127736615	127736715	.	-	.	gene_id "SE:1:127736715-127737394:127737421-127737507:-"; transcript_id "SE:1:127736715-127737394:127737421-127737507:-:alternative1";
1	hq_isoforms.fasta.no5merge.collapsed.gff	exon	127737394	127737421	.	-	.	gene_id "SE:1:127736715-127737394:127737421-127737507:-"; transcript_id "SE:1:127736715-127737394:127737421-127737507:-:alternative1";
1	hq_isoforms.fasta.no5merge.collapsed.gff	exon	127737507	127737607	.	-	.	gene_id "SE:1:127736715-127737394:127737421-127737507:-"; transcript_id "SE:1:127736715-127737394:127737421-127737507:-:alternative1";
1	hq_isoforms.fasta.no5merge.collapsed.gff	exon	127751296	127751396	.	-	.	gene_id "SE:1:127751396-127754313:127754345-127758199:-"; transcript_id "SE:1:127751396-127754313:127754345-127758199:-:alternative2";
1	hq_isoforms.fasta.no5merge.collapsed.gff	exon	127758199	127758299	.	-	.	gene_id "SE:1:127751396-127754313:127754345-127758199:-"; transcript_id "SE:1:127751396-127754313:127754345-127758199:-:alternative2";
1	hq_isoforms.fasta.no5merge.collapsed.gff	exon	127751296	127751396	.	-	.	gene_id "SE:1:127751396-127754313:127754345-127758199:-"; transcript_id "SE:1:127751396-127754313:127754345-127758199:-:alternative1";
1	hq_isoforms.fasta.no5merge.collapsed.gff	exon	127754313	127754345	.	-	.	gene_id "SE:1:127751396-127754313:127754345-127758199:-"; transcript_id "SE:1:127751396-127754313:127754345-127758199:-:alternative1";
1	hq_isoforms.fasta.no5merge.collapsed.gff	exon	127758199	127758299	.	-	.	gene_id "SE:1:127751396-127754313:127754345-127758199:-"; transcript_id "SE:1:127751396-127754313:127754345-127758199:-:alternative1";
1	hq_isoforms.fasta.no5merge.collapsed.gff	exon	127754245	127754345	.	-	.	gene_id "SE:1:127754345-127757634:127757849-127758199:-"; transcript_id "SE:1:127754345-127757634:127757849-127758199:-:alternative2";
1	hq_isoforms.fasta.no5merge.collapsed.gff	exon	127758199	127758299	.	-	.	gene_id "SE:1:127754345-127757634:127757849-127758199:-"; transcript_id "SE:1:127754345-127757634:127757849-127758199:-:alternative2";
1	hq_isoforms.fasta.no5merge.collapsed.gff	exon	127754245	127754345	.	-	.	gene_id "SE:1:127754345-127757634:127757849-127758199:-"; transcript_id "SE:1:127754345-127757634:127757849-127758199:-:alternative1";
1	hq_isoforms.fasta.no5merge.collapsed.gff	exon	127757634	127757849	.	-	.	gene_id "SE:1:127754345-127757634:127757849-127758199:-"; transcript_id "SE:1:127754345-127757634:127757849-127758199:-:alternative1";
1	hq_isoforms.fasta.no5merge.collapsed.gff	exon	127758199	127758299	.	-	.	gene_id "SE:1:127754345-127757634:127757849-127758199:-"; transcript_id "SE:1:127754345-127757634:127757849-127758199:-:alternative1";
1	hq_isoforms.fasta.no5merge.collapsed.gff	exon	128741843	128741943	.	-	.	gene_id "SE:1:128741943-128742761:128742849-128743664:-"; transcript_id "SE:1:128741943-128742761:128742849-128743664:-:alternative2";
1	hq_isoforms.fasta.no5merge.collapsed.gff	exon	128743664	128743764	.	-	.	gene_id "SE:1:128741943-128742761:128742849-128743664:-"; transcript_id "SE:1:128741943-128742761:128742849-128743664:-:alternative2";
1	hq_isoforms.fasta.no5merge.collapsed.gff	exon	128741843	128741943	.	-	.	gene_id "SE:1:128741943-128742761:128742849-128743664:-"; transcript_id "SE:1:128741943-128742761:128742849-128743664:-:alternative1";
1	hq_isoforms.fasta.no5merge.collapsed.gff	exon	128742761	128742849	.	-	.	gene_id "SE:1:128741943-128742761:128742849-128743664:-"; transcript_id "SE:1:128741943-128742761:128742849-128743664:-:alternative1";
1	hq_isoforms.fasta.no5merge.collapsed.gff	exon	128743664	128743764	.	-	.	gene_id "SE:1:128741943-128742761:128742849-128743664:-"; transcript_id "SE:1:128741943-128742761:128742849-128743664:-:alternative1";
1	hq_isoforms.fasta.no5merge.collapsed.gff	exon	129608235	129608335	.	-	.	gene_id "SE:1:129608335-129609465:129609624-129610077:-"; transcript_id "SE:1:129608335-129609465:129609624-129610077:-:alternative2";
1	hq_isoforms.fasta.no5merge.collapsed.gff	exon	129610077	129610177	.	-	.	gene_id "SE:1:129608335-129609465:129609624-129610077:-"; transcript_id "SE:1:129608335-129609465:129609624-129610077:-:alternative2";
1	hq_isoforms.fasta.no5merge.collapsed.gff	exon	129608235	129608335	.	-	.	gene_id "SE:1:129608335-129609465:129609624-129610077:-"; transcript_id "SE:1:129608335-129609465:129609624-129610077:-:alternative1";
1	hq_isoforms.fasta.no5merge.collapsed.gff	exon	129609465	129609624	.	-	.	gene_id "SE:1:129608335-129609465:129609624-129610077:-"; transcript_id "SE:1:129608335-129609465:129609624-129610077:-:alternative1";
1	hq_isoforms.fasta.no5merge.collapsed.gff	exon	129610077	129610177	.	-	.	gene_id "SE:1:129608335-129609465:129609624-129610077:-"; transcript_id "SE:1:129608335-129609465:129609624-129610077:-:alternative1";
1	hq_isoforms.fasta.no5merge.collapsed.gff	exon	133515434	133515534	.	-	.	gene_id "SE:1:133515534-133517437:133517606-133517795:-"; transcript_id "SE:1:133515534-133517437:133517606-133517795:-:alternative2";
1	hq_isoforms.fasta.no5merge.collapsed.gff	exon	133517795	133517895	.	-	.	gene_id "SE:1:133515534-133517437:133517606-133517795:-"; transcript_id "SE:1:133515534-133517437:133517606-133517795:-:alternative2";
1	hq_isoforms.fasta.no5merge.collapsed.gff	exon	133515434	133515534	.	-	.	gene_id "SE:1:133515534-133517437:133517606-133517795:-"; transcript_id "SE:1:133515534-133517437:133517606-133517795:-:alternative1";
1	hq_isoforms.fasta.no5merge.collapsed.gff	exon	133517437	133517606	.	-	.	gene_id "SE:1:133515534-133517437:133517606-133517795:-"; transcript_id "SE:1:133515534-133517437:133517606-133517795:-:alternative1";
1	hq_isoforms.fasta.no5merge.collapsed.gff	exon	133517795	133517895	.	-	.	gene_id "SE:1:133515534-133517437:133517606-133517795:-"; transcript_id "SE:1:133515534-133517437:133517606-133517795:-:alternative1";
1	hq_isoforms.fasta.no5merge.collapsed.gff	exon	134133175	134133275	.	-	.	gene_id "SE:1:134133275-134138025:134138084-134162373:-"; transcript_id "SE:1:134133275-134138025:134138084-134162373:-:alternative2";
1	hq_isoforms.fasta.no5merge.collapsed.gff	exon	134162373	134162473	.	-	.	gene_id "SE:1:134133275-134138025:134138084-134162373:-"; transcript_id "SE:1:134133275-134138025:134138084-134162373:-:alternative2";
1	hq_isoforms.fasta.no5merge.collapsed.gff	exon	134133175	134133275	.	-	.	gene_id "SE:1:134133275-134138025:134138084-134162373:-"; transcript_id "SE:1:134133275-134138025:134138084-134162373:-:alternative1";
1	hq_isoforms.fasta.no5merge.collapsed.gff	exon	134138025	134138084	.	-	.	gene_id "SE:1:134133275-134138025:134138084-134162373:-"; transcript_id "SE:1:134133275-134138025:134138084-134162373:-:alternative1";
1	hq_isoforms.fasta.no5merge.collapsed.gff	exon	134162373	134162473	.	-	.	gene_id "SE:1:134133275-134138025:134138084-134162373:-"; transcript_id "SE:1:134133275-134138025:134138084-134162373:-:alternative1";
1	hq_isoforms.fasta.no5merge.collapsed.gff	exon	134137984	134138084	.	-	.	gene_id "SE:1:134138084-134161668:134161709-134162373:-"; transcript_id "SE:1:134138084-134161668:134161709-134162373:-:alternative2";
1	hq_isoforms.fasta.no5merge.collapsed.gff	exon	134162373	134162473	.	-	.	gene_id "SE:1:134138084-134161668:134161709-134162373:-"; transcript_id "SE:1:134138084-134161668:134161709-134162373:-:alternative2";
1	hq_isoforms.fasta.no5merge.collapsed.gff	exon	134137984	134138084	.	-	.	gene_id "SE:1:134138084-134161668:134161709-134162373:-"; transcript_id "SE:1:134138084-134161668:134161709-134162373:-:alternative1";
1	hq_isoforms.fasta.no5merge.collapsed.gff	exon	134161668	134161709	.	-	.	gene_id "SE:1:134138084-134161668:134161709-134162373:-"; transcript_id "SE:1:134138084-134161668:134161709-134162373:-:alternative1";
1	hq_isoforms.fasta.no5merge.collapsed.gff	exon	134162373	134162473	.	-	.	gene_id "SE:1:134138084-134161668:134161709-134162373:-"; transcript_id "SE:1:134138084-134161668:134161709-134162373:-:alternative1";
1	hq_isoforms.fasta.no5merge.collapsed.gff	exon	135051617	135051717	.	-	.	gene_id "SE:1:135051717-135052843:135053190-135059064:-"; transcript_id "SE:1:135051717-135052843:135053190-135059064:-:alternative2";
1	hq_isoforms.fasta.no5merge.collapsed.gff	exon	135059064	135059164	.	-	.	gene_id "SE:1:135051717-135052843:135053190-135059064:-"; transcript_id "SE:1:135051717-135052843:135053190-135059064:-:alternative2";
1	hq_isoforms.fasta.no5merge.collapsed.gff	exon	135051617	135051717	.	-	.	gene_id "SE:1:135051717-135052843:135053190-135059064:-"; transcript_id "SE:1:135051717-135052843:135053190-135059064:-:alternative1";
1	hq_isoforms.fasta.no5merge.collapsed.gff	exon	135052843	135053190	.	-	.	gene_id "SE:1:135051717-135052843:135053190-135059064:-"; transcript_id "SE:1:135051717-135052843:135053190-135059064:-:alternative1";
1	hq_isoforms.fasta.no5merge.collapsed.gff	exon	135059064	135059164	.	-	.	gene_id "SE:1:135051717-135052843:135053190-135059064:-"; transcript_id "SE:1:135051717-135052843:135053190-135059064:-:alternative1";
1	hq_isoforms.fasta.no5merge.collapsed.gff	exon	137168535	137168635	.	-	.	gene_id "SE:1:137168635-137171628:137171879-137215699:-"; transcript_id "SE:1:137168635-137171628:137171879-137215699:-:alternative2";
1	hq_isoforms.fasta.no5merge.collapsed.gff	exon	137215699	137215799	.	-	.	gene_id "SE:1:137168635-137171628:137171879-137215699:-"; transcript_id "SE:1:137168635-137171628:137171879-137215699:-:alternative2";
1	hq_isoforms.fasta.no5merge.collapsed.gff	exon	137168535	137168635	.	-	.	gene_id "SE:1:137168635-137171628:137171879-137215699:-"; transcript_id "SE:1:137168635-137171628:137171879-137215699:-:alternative1";
1	hq_isoforms.fasta.no5merge.collapsed.gff	exon	137171628	137171879	.	-	.	gene_id "SE:1:137168635-137171628:137171879-137215699:-"; transcript_id "SE:1:137168635-137171628:137171879-137215699:-:alternative1";
1	hq_isoforms.fasta.no5merge.collapsed.gff	exon	137215699	137215799	.	-	.	gene_id "SE:1:137168635-137171628:137171879-137215699:-"; transcript_id "SE:1:137168635-137171628:137171879-137215699:-:alternative1";
1	hq_isoforms.fasta.no5merge.collapsed.gff	exon	137485226	137485326	.	-	.	gene_id "SE:1:137485326-137485500:137485559-137487371:-"; transcript_id "SE:1:137485326-137485500:137485559-137487371:-:alternative2";
1	hq_isoforms.fasta.no5merge.collapsed.gff	exon	137487371	137487471	.	-	.	gene_id "SE:1:137485326-137485500:137485559-137487371:-"; transcript_id "SE:1:137485326-137485500:137485559-137487371:-:alternative2";
1	hq_isoforms.fasta.no5merge.collapsed.gff	exon	137485226	137485326	.	-	.	gene_id "SE:1:137485326-137485500:137485559-137487371:-"; transcript_id "SE:1:137485326-137485500:137485559-137487371:-:alternative1";
1	hq_isoforms.fasta.no5merge.collapsed.gff	exon	137485500	137485559	.	-	.	gene_id "SE:1:137485326-137485500:137485559-137487371:-"; transcript_id "SE:1:137485326-137485500:137485559-137487371:-:alternative1";
1	hq_isoforms.fasta.no5merge.collapsed.gff	exon	137487371	137487471	.	-	.	gene_id "SE:1:137485326-137485500:137485559-137487371:-"; transcript_id "SE:1:137485326-137485500:137485559-137487371:-:alternative1";
1	hq_isoforms.fasta.no5merge.collapsed.gff	exon	137531256	137531356	.	-	.	gene_id "SE:1:137531356-137540630:137540737-137542989:-"; transcript_id "SE:1:137531356-137540630:137540737-137542989:-:alternative2";
1	hq_isoforms.fasta.no5merge.collapsed.gff	exon	137542989	137543089	.	-	.	gene_id "SE:1:137531356-137540630:137540737-137542989:-"; transcript_id "SE:1:137531356-137540630:137540737-137542989:-:alternative2";
1	hq_isoforms.fasta.no5merge.collapsed.gff	exon	137531256	137531356	.	-	.	gene_id "SE:1:137531356-137540630:137540737-137542989:-"; transcript_id "SE:1:137531356-137540630:137540737-137542989:-:alternative1";
1	hq_isoforms.fasta.no5merge.collapsed.gff	exon	137540630	137540737	.	-	.	gene_id "SE:1:137531356-137540630:137540737-137542989:-"; transcript_id "SE:1:137531356-137540630:137540737-137542989:-:alternative1";
1	hq_isoforms.fasta.no5merge.collapsed.gff	exon	137542989	137543089	.	-	.	gene_id "SE:1:137531356-137540630:137540737-137542989:-"; transcript_id "SE:1:137531356-137540630:137540737-137542989:-:alternative1";
1	hq_isoforms.fasta.no5merge.collapsed.gff	exon	138834899	138834999	.	-	.	gene_id "SE:1:138834999-138836286:138836312-138838409:-"; transcript_id "SE:1:138834999-138836286:138836312-138838409:-:alternative2";
1	hq_isoforms.fasta.no5merge.collapsed.gff	exon	138838409	138838509	.	-	.	gene_id "SE:1:138834999-138836286:138836312-138838409:-"; transcript_id "SE:1:138834999-138836286:138836312-138838409:-:alternative2";
1	hq_isoforms.fasta.no5merge.collapsed.gff	exon	138834899	138834999	.	-	.	gene_id "SE:1:138834999-138836286:138836312-138838409:-"; transcript_id "SE:1:138834999-138836286:138836312-138838409:-:alternative1";
1	hq_isoforms.fasta.no5merge.collapsed.gff	exon	138836286	138836312	.	-	.	gene_id "SE:1:138834999-138836286:138836312-138838409:-"; transcript_id "SE:1:138834999-138836286:138836312-138838409:-:alternative1";
1	hq_isoforms.fasta.no5merge.collapsed.gff	exon	138838409	138838509	.	-	.	gene_id "SE:1:138834999-138836286:138836312-138838409:-"; transcript_id "SE:1:138834999-138836286:138836312-138838409:-:alternative1";
1	hq_isoforms.fasta.no5merge.collapsed.gff	exon	138849519	138849619	.	-	.	gene_id "SE:1:138849619-138851806:138851956-138862611:-"; transcript_id "SE:1:138849619-138851806:138851956-138862611:-:alternative2";
1	hq_isoforms.fasta.no5merge.collapsed.gff	exon	138862611	138862711	.	-	.	gene_id "SE:1:138849619-138851806:138851956-138862611:-"; transcript_id "SE:1:138849619-138851806:138851956-138862611:-:alternative2";
1	hq_isoforms.fasta.no5merge.collapsed.gff	exon	138849519	138849619	.	-	.	gene_id "SE:1:138849619-138851806:138851956-138862611:-"; transcript_id "SE:1:138849619-138851806:138851956-138862611:-:alternative1";
1	hq_isoforms.fasta.no5merge.collapsed.gff	exon	138851806	138851956	.	-	.	gene_id "SE:1:138849619-138851806:138851956-138862611:-"; transcript_id "SE:1:138849619-138851806:138851956-138862611:-:alternative1";
1	hq_isoforms.fasta.no5merge.collapsed.gff	exon	138862611	138862711	.	-	.	gene_id "SE:1:138849619-138851806:138851956-138862611:-"; transcript_id "SE:1:138849619-138851806:138851956-138862611:-:alternative1";
1	hq_isoforms.fasta.no5merge.collapsed.gff	exon	138846589	138846689	.	-	.	gene_id "SE:1:138846689-138849532:138849619-138862611:-"; transcript_id "SE:1:138846689-138849532:138849619-138862611:-:alternative2";
1	hq_isoforms.fasta.no5merge.collapsed.gff	exon	138862611	138862711	.	-	.	gene_id "SE:1:138846689-138849532:138849619-138862611:-"; transcript_id "SE:1:138846689-138849532:138849619-138862611:-:alternative2";
1	hq_isoforms.fasta.no5merge.collapsed.gff	exon	138846589	138846689	.	-	.	gene_id "SE:1:138846689-138849532:138849619-138862611:-"; transcript_id "SE:1:138846689-138849532:138849619-138862611:-:alternative1";
1	hq_isoforms.fasta.no5merge.collapsed.gff	exon	138849532	138849619	.	-	.	gene_id "SE:1:138846689-138849532:138849619-138862611:-"; transcript_id "SE:1:138846689-138849532:138849619-138862611:-:alternative1";
1	hq_isoforms.fasta.no5merge.collapsed.gff	exon	138862611	138862711	.	-	.	gene_id "SE:1:138846689-138849532:138849619-138862611:-"; transcript_id "SE:1:138846689-138849532:138849619-138862611:-:alternative1";
1	hq_isoforms.fasta.no5merge.collapsed.gff	exon	138990807	138990907	.	-	.	gene_id "SE:1:138990907-138992139:138992264-138993057:-"; transcript_id "SE:1:138990907-138992139:138992264-138993057:-:alternative2";
1	hq_isoforms.fasta.no5merge.collapsed.gff	exon	138993057	138993157	.	-	.	gene_id "SE:1:138990907-138992139:138992264-138993057:-"; transcript_id "SE:1:138990907-138992139:138992264-138993057:-:alternative2";
1	hq_isoforms.fasta.no5merge.collapsed.gff	exon	138990807	138990907	.	-	.	gene_id "SE:1:138990907-138992139:138992264-138993057:-"; transcript_id "SE:1:138990907-138992139:138992264-138993057:-:alternative1";
1	hq_isoforms.fasta.no5merge.collapsed.gff	exon	138992139	138992264	.	-	.	gene_id "SE:1:138990907-138992139:138992264-138993057:-"; transcript_id "SE:1:138990907-138992139:138992264-138993057:-:alternative1";
1	hq_isoforms.fasta.no5merge.collapsed.gff	exon	138993057	138993157	.	-	.	gene_id "SE:1:138990907-138992139:138992264-138993057:-"; transcript_id "SE:1:138990907-138992139:138992264-138993057:-:alternative1";
1	hq_isoforms.fasta.no5merge.collapsed.gff	exon	139028309	139028409	.	-	.	gene_id "SE:1:139028409-139036805:139037036-139044894:-"; transcript_id "SE:1:139028409-139036805:139037036-139044894:-:alternative2";
1	hq_isoforms.fasta.no5merge.collapsed.gff	exon	139044894	139044994	.	-	.	gene_id "SE:1:139028409-139036805:139037036-139044894:-"; transcript_id "SE:1:139028409-139036805:139037036-139044894:-:alternative2";
1	hq_isoforms.fasta.no5merge.collapsed.gff	exon	139028309	139028409	.	-	.	gene_id "SE:1:139028409-139036805:139037036-139044894:-"; transcript_id "SE:1:139028409-139036805:139037036-139044894:-:alternative1";
1	hq_isoforms.fasta.no5merge.collapsed.gff	exon	139036805	139037036	.	-	.	gene_id "SE:1:139028409-139036805:139037036-139044894:-"; transcript_id "SE:1:139028409-139036805:139037036-139044894:-:alternative1";
1	hq_isoforms.fasta.no5merge.collapsed.gff	exon	139044894	139044994	.	-	.	gene_id "SE:1:139028409-139036805:139037036-139044894:-"; transcript_id "SE:1:139028409-139036805:139037036-139044894:-:alternative1";
1	hq_isoforms.fasta.no5merge.collapsed.gff	exon	139174099	139174199	.	-	.	gene_id "SE:1:139174199-139228173:139228203-139286412:-"; transcript_id "SE:1:139174199-139228173:139228203-139286412:-:alternative2";
1	hq_isoforms.fasta.no5merge.collapsed.gff	exon	139286412	139286512	.	-	.	gene_id "SE:1:139174199-139228173:139228203-139286412:-"; transcript_id "SE:1:139174199-139228173:139228203-139286412:-:alternative2";
1	hq_isoforms.fasta.no5merge.collapsed.gff	exon	139174099	139174199	.	-	.	gene_id "SE:1:139174199-139228173:139228203-139286412:-"; transcript_id "SE:1:139174199-139228173:139228203-139286412:-:alternative1";
1	hq_isoforms.fasta.no5merge.collapsed.gff	exon	139228173	139228203	.	-	.	gene_id "SE:1:139174199-139228173:139228203-139286412:-"; transcript_id "SE:1:139174199-139228173:139228203-139286412:-:alternative1";
1	hq_isoforms.fasta.no5merge.collapsed.gff	exon	139286412	139286512	.	-	.	gene_id "SE:1:139174199-139228173:139228203-139286412:-"; transcript_id "SE:1:139174199-139228173:139228203-139286412:-:alternative1";
1	hq_isoforms.fasta.no5merge.collapsed.gff	exon	139255498	139255598	.	-	.	gene_id "SE:1:139255598-139256766:139256845-139286412:-"; transcript_id "SE:1:139255598-139256766:139256845-139286412:-:alternative2";
1	hq_isoforms.fasta.no5merge.collapsed.gff	exon	139286412	139286512	.	-	.	gene_id "SE:1:139255598-139256766:139256845-139286412:-"; transcript_id "SE:1:139255598-139256766:139256845-139286412:-:alternative2";
1	hq_isoforms.fasta.no5merge.collapsed.gff	exon	139255498	139255598	.	-	.	gene_id "SE:1:139255598-139256766:139256845-139286412:-"; transcript_id "SE:1:139255598-139256766:139256845-139286412:-:alternative1";
1	hq_isoforms.fasta.no5merge.collapsed.gff	exon	139256766	139256845	.	-	.	gene_id "SE:1:139255598-139256766:139256845-139286412:-"; transcript_id "SE:1:139255598-139256766:139256845-139286412:-:alternative1";
1	hq_isoforms.fasta.no5merge.collapsed.gff	exon	139286412	139286512	.	-	.	gene_id "SE:1:139255598-139256766:139256845-139286412:-"; transcript_id "SE:1:139255598-139256766:139256845-139286412:-:alternative1";
1	hq_isoforms.fasta.no5merge.collapsed.gff	exon	139811187	139811287	.	-	.	gene_id "SE:1:139811287-139813919:139814000-139814700:-"; transcript_id "SE:1:139811287-139813919:139814000-139814700:-:alternative2";
1	hq_isoforms.fasta.no5merge.collapsed.gff	exon	139814700	139814800	.	-	.	gene_id "SE:1:139811287-139813919:139814000-139814700:-"; transcript_id "SE:1:139811287-139813919:139814000-139814700:-:alternative2";
1	hq_isoforms.fasta.no5merge.collapsed.gff	exon	139811187	139811287	.	-	.	gene_id "SE:1:139811287-139813919:139814000-139814700:-"; transcript_id "SE:1:139811287-139813919:139814000-139814700:-:alternative1";
1	hq_isoforms.fasta.no5merge.collapsed.gff	exon	139813919	139814000	.	-	.	gene_id "SE:1:139811287-139813919:139814000-139814700:-"; transcript_id "SE:1:139811287-139813919:139814000-139814700:-:alternative1";
1	hq_isoforms.fasta.no5merge.collapsed.gff	exon	139814700	139814800	.	-	.	gene_id "SE:1:139811287-139813919:139814000-139814700:-"; transcript_id "SE:1:139811287-139813919:139814000-139814700:-:alternative1";
1	hq_isoforms.fasta.no5merge.collapsed.gff	exon	140297545	140297645	.	-	.	gene_id "SE:1:140297645-140299302:140299479-140301577:-"; transcript_id "SE:1:140297645-140299302:140299479-140301577:-:alternative2";
1	hq_isoforms.fasta.no5merge.collapsed.gff	exon	140301577	140301677	.	-	.	gene_id "SE:1:140297645-140299302:140299479-140301577:-"; transcript_id "SE:1:140297645-140299302:140299479-140301577:-:alternative2";
1	hq_isoforms.fasta.no5merge.collapsed.gff	exon	140297545	140297645	.	-	.	gene_id "SE:1:140297645-140299302:140299479-140301577:-"; transcript_id "SE:1:140297645-140299302:140299479-140301577:-:alternative1";
1	hq_isoforms.fasta.no5merge.collapsed.gff	exon	140299302	140299479	.	-	.	gene_id "SE:1:140297645-140299302:140299479-140301577:-"; transcript_id "SE:1:140297645-140299302:140299479-140301577:-:alternative1";
1	hq_isoforms.fasta.no5merge.collapsed.gff	exon	140301577	140301677	.	-	.	gene_id "SE:1:140297645-140299302:140299479-140301577:-"; transcript_id "SE:1:140297645-140299302:140299479-140301577:-:alternative1";
1	hq_isoforms.fasta.no5merge.collapsed.gff	exon	141492483	141492583	.	-	.	gene_id "SE:1:141492583-141493336:141493467-141494249:-"; transcript_id "SE:1:141492583-141493336:141493467-141494249:-:alternative2";
1	hq_isoforms.fasta.no5merge.collapsed.gff	exon	141494249	141494349	.	-	.	gene_id "SE:1:141492583-141493336:141493467-141494249:-"; transcript_id "SE:1:141492583-141493336:141493467-141494249:-:alternative2";
1	hq_isoforms.fasta.no5merge.collapsed.gff	exon	141492483	141492583	.	-	.	gene_id "SE:1:141492583-141493336:141493467-141494249:-"; transcript_id "SE:1:141492583-141493336:141493467-141494249:-:alternative1";
1	hq_isoforms.fasta.no5merge.collapsed.gff	exon	141493336	141493467	.	-	.	gene_id "SE:1:141492583-141493336:141493467-141494249:-"; transcript_id "SE:1:141492583-141493336:141493467-141494249:-:alternative1";
1	hq_isoforms.fasta.no5merge.collapsed.gff	exon	141494249	141494349	.	-	.	gene_id "SE:1:141492583-141493336:141493467-141494249:-"; transcript_id "SE:1:141492583-141493336:141493467-141494249:-:alternative1";
1	hq_isoforms.fasta.no5merge.collapsed.gff	exon	141998553	141998653	.	-	.	gene_id "SE:1:141998653-142001353:142001415-142005342:-"; transcript_id "SE:1:141998653-142001353:142001415-142005342:-:alternative2";
1	hq_isoforms.fasta.no5merge.collapsed.gff	exon	142005342	142005442	.	-	.	gene_id "SE:1:141998653-142001353:142001415-142005342:-"; transcript_id "SE:1:141998653-142001353:142001415-142005342:-:alternative2";
1	hq_isoforms.fasta.no5merge.collapsed.gff	exon	141998553	141998653	.	-	.	gene_id "SE:1:141998653-142001353:142001415-142005342:-"; transcript_id "SE:1:141998653-142001353:142001415-142005342:-:alternative1";
1	hq_isoforms.fasta.no5merge.collapsed.gff	exon	142001353	142001415	.	-	.	gene_id "SE:1:141998653-142001353:142001415-142005342:-"; transcript_id "SE:1:141998653-142001353:142001415-142005342:-:alternative1";
1	hq_isoforms.fasta.no5merge.collapsed.gff	exon	142005342	142005442	.	-	.	gene_id "SE:1:141998653-142001353:142001415-142005342:-"; transcript_id "SE:1:141998653-142001353:142001415-142005342:-:alternative1";
1	hq_isoforms.fasta.no5merge.collapsed.gff	exon	142049607	142049707	.	-	.	gene_id "SE:1:142049707-142051462:142051633-142051951:-"; transcript_id "SE:1:142049707-142051462:142051633-142051951:-:alternative2";
1	hq_isoforms.fasta.no5merge.collapsed.gff	exon	142051951	142052051	.	-	.	gene_id "SE:1:142049707-142051462:142051633-142051951:-"; transcript_id "SE:1:142049707-142051462:142051633-142051951:-:alternative2";
1	hq_isoforms.fasta.no5merge.collapsed.gff	exon	142049607	142049707	.	-	.	gene_id "SE:1:142049707-142051462:142051633-142051951:-"; transcript_id "SE:1:142049707-142051462:142051633-142051951:-:alternative1";
1	hq_isoforms.fasta.no5merge.collapsed.gff	exon	142051462	142051633	.	-	.	gene_id "SE:1:142049707-142051462:142051633-142051951:-"; transcript_id "SE:1:142049707-142051462:142051633-142051951:-:alternative1";
1	hq_isoforms.fasta.no5merge.collapsed.gff	exon	142051951	142052051	.	-	.	gene_id "SE:1:142049707-142051462:142051633-142051951:-"; transcript_id "SE:1:142049707-142051462:142051633-142051951:-:alternative1";
1	hq_isoforms.fasta.no5merge.collapsed.gff	exon	142049607	142049707	.	-	.	gene_id "SE:1:142049707-142051481:142051633-142051951:-"; transcript_id "SE:1:142049707-142051481:142051633-142051951:-:alternative2";
1	hq_isoforms.fasta.no5merge.collapsed.gff	exon	142051951	142052051	.	-	.	gene_id "SE:1:142049707-142051481:142051633-142051951:-"; transcript_id "SE:1:142049707-142051481:142051633-142051951:-:alternative2";
1	hq_isoforms.fasta.no5merge.collapsed.gff	exon	142049607	142049707	.	-	.	gene_id "SE:1:142049707-142051481:142051633-142051951:-"; transcript_id "SE:1:142049707-142051481:142051633-142051951:-:alternative1";
1	hq_isoforms.fasta.no5merge.collapsed.gff	exon	142051481	142051633	.	-	.	gene_id "SE:1:142049707-142051481:142051633-142051951:-"; transcript_id "SE:1:142049707-142051481:142051633-142051951:-:alternative1";
1	hq_isoforms.fasta.no5merge.collapsed.gff	exon	142051951	142052051	.	-	.	gene_id "SE:1:142049707-142051481:142051633-142051951:-"; transcript_id "SE:1:142049707-142051481:142051633-142051951:-:alternative1";
1	hq_isoforms.fasta.no5merge.collapsed.gff	exon	142049607	142049707	.	-	.	gene_id "SE:1:142049707-142051577:142051633-142051951:-"; transcript_id "SE:1:142049707-142051577:142051633-142051951:-:alternative2";
1	hq_isoforms.fasta.no5merge.collapsed.gff	exon	142051951	142052051	.	-	.	gene_id "SE:1:142049707-142051577:142051633-142051951:-"; transcript_id "SE:1:142049707-142051577:142051633-142051951:-:alternative2";
1	hq_isoforms.fasta.no5merge.collapsed.gff	exon	142049607	142049707	.	-	.	gene_id "SE:1:142049707-142051577:142051633-142051951:-"; transcript_id "SE:1:142049707-142051577:142051633-142051951:-:alternative1";
1	hq_isoforms.fasta.no5merge.collapsed.gff	exon	142051577	142051633	.	-	.	gene_id "SE:1:142049707-142051577:142051633-142051951:-"; transcript_id "SE:1:142049707-142051577:142051633-142051951:-:alternative1";
1	hq_isoforms.fasta.no5merge.collapsed.gff	exon	142051951	142052051	.	-	.	gene_id "SE:1:142049707-142051577:142051633-142051951:-"; transcript_id "SE:1:142049707-142051577:142051633-142051951:-:alternative1";
1	hq_isoforms.fasta.no5merge.collapsed.gff	exon	143634598	143634698	.	-	.	gene_id "SE:1:143634698-143644071:143644144-143649894:-"; transcript_id "SE:1:143634698-143644071:143644144-143649894:-:alternative2";
1	hq_isoforms.fasta.no5merge.collapsed.gff	exon	143649894	143649994	.	-	.	gene_id "SE:1:143634698-143644071:143644144-143649894:-"; transcript_id "SE:1:143634698-143644071:143644144-143649894:-:alternative2";
1	hq_isoforms.fasta.no5merge.collapsed.gff	exon	143634598	143634698	.	-	.	gene_id "SE:1:143634698-143644071:143644144-143649894:-"; transcript_id "SE:1:143634698-143644071:143644144-143649894:-:alternative1";
1	hq_isoforms.fasta.no5merge.collapsed.gff	exon	143644071	143644144	.	-	.	gene_id "SE:1:143634698-143644071:143644144-143649894:-"; transcript_id "SE:1:143634698-143644071:143644144-143649894:-:alternative1";
1	hq_isoforms.fasta.no5merge.collapsed.gff	exon	143649894	143649994	.	-	.	gene_id "SE:1:143634698-143644071:143644144-143649894:-"; transcript_id "SE:1:143634698-143644071:143644144-143649894:-:alternative1";
1	hq_isoforms.fasta.no5merge.collapsed.gff	exon	143931324	143931424	.	-	.	gene_id "SE:1:143931424-143935543:143935557-143936039:-"; transcript_id "SE:1:143931424-143935543:143935557-143936039:-:alternative2";
1	hq_isoforms.fasta.no5merge.collapsed.gff	exon	143936039	143936139	.	-	.	gene_id "SE:1:143931424-143935543:143935557-143936039:-"; transcript_id "SE:1:143931424-143935543:143935557-143936039:-:alternative2";
1	hq_isoforms.fasta.no5merge.collapsed.gff	exon	143931324	143931424	.	-	.	gene_id "SE:1:143931424-143935543:143935557-143936039:-"; transcript_id "SE:1:143931424-143935543:143935557-143936039:-:alternative1";
1	hq_isoforms.fasta.no5merge.collapsed.gff	exon	143935543	143935557	.	-	.	gene_id "SE:1:143931424-143935543:143935557-143936039:-"; transcript_id "SE:1:143931424-143935543:143935557-143936039:-:alternative1";
1	hq_isoforms.fasta.no5merge.collapsed.gff	exon	143936039	143936139	.	-	.	gene_id "SE:1:143931424-143935543:143935557-143936039:-"; transcript_id "SE:1:143931424-143935543:143935557-143936039:-:alternative1";
1	hq_isoforms.fasta.no5merge.collapsed.gff	exon	143948041	143948141	.	-	.	gene_id "SE:1:143948141-143949484:143949588-143950546:-"; transcript_id "SE:1:143948141-143949484:143949588-143950546:-:alternative2";
1	hq_isoforms.fasta.no5merge.collapsed.gff	exon	143950546	143950646	.	-	.	gene_id "SE:1:143948141-143949484:143949588-143950546:-"; transcript_id "SE:1:143948141-143949484:143949588-143950546:-:alternative2";
1	hq_isoforms.fasta.no5merge.collapsed.gff	exon	143948041	143948141	.	-	.	gene_id "SE:1:143948141-143949484:143949588-143950546:-"; transcript_id "SE:1:143948141-143949484:143949588-143950546:-:alternative1";
1	hq_isoforms.fasta.no5merge.collapsed.gff	exon	143949484	143949588	.	-	.	gene_id "SE:1:143948141-143949484:143949588-143950546:-"; transcript_id "SE:1:143948141-143949484:143949588-143950546:-:alternative1";
1	hq_isoforms.fasta.no5merge.collapsed.gff	exon	143950546	143950646	.	-	.	gene_id "SE:1:143948141-143949484:143949588-143950546:-"; transcript_id "SE:1:143948141-143949484:143949588-143950546:-:alternative1";
1	hq_isoforms.fasta.no5merge.collapsed.gff	exon	143942409	143942509	.	-	.	gene_id "SE:1:143942509-143944678:143944734-143945669:-"; transcript_id "SE:1:143942509-143944678:143944734-143945669:-:alternative2";
1	hq_isoforms.fasta.no5merge.collapsed.gff	exon	143945669	143945769	.	-	.	gene_id "SE:1:143942509-143944678:143944734-143945669:-"; transcript_id "SE:1:143942509-143944678:143944734-143945669:-:alternative2";
1	hq_isoforms.fasta.no5merge.collapsed.gff	exon	143942409	143942509	.	-	.	gene_id "SE:1:143942509-143944678:143944734-143945669:-"; transcript_id "SE:1:143942509-143944678:143944734-143945669:-:alternative1";
1	hq_isoforms.fasta.no5merge.collapsed.gff	exon	143944678	143944734	.	-	.	gene_id "SE:1:143942509-143944678:143944734-143945669:-"; transcript_id "SE:1:143942509-143944678:143944734-143945669:-:alternative1";
1	hq_isoforms.fasta.no5merge.collapsed.gff	exon	143945669	143945769	.	-	.	gene_id "SE:1:143942509-143944678:143944734-143945669:-"; transcript_id "SE:1:143942509-143944678:143944734-143945669:-:alternative1";
1	hq_isoforms.fasta.no5merge.collapsed.gff	exon	144319436	144319536	.	-	.	gene_id "SE:1:144319536-144320290:144320325-144321600:-"; transcript_id "SE:1:144319536-144320290:144320325-144321600:-:alternative2";
1	hq_isoforms.fasta.no5merge.collapsed.gff	exon	144321600	144321700	.	-	.	gene_id "SE:1:144319536-144320290:144320325-144321600:-"; transcript_id "SE:1:144319536-144320290:144320325-144321600:-:alternative2";
1	hq_isoforms.fasta.no5merge.collapsed.gff	exon	144319436	144319536	.	-	.	gene_id "SE:1:144319536-144320290:144320325-144321600:-"; transcript_id "SE:1:144319536-144320290:144320325-144321600:-:alternative1";
1	hq_isoforms.fasta.no5merge.collapsed.gff	exon	144320290	144320325	.	-	.	gene_id "SE:1:144319536-144320290:144320325-144321600:-"; transcript_id "SE:1:144319536-144320290:144320325-144321600:-:alternative1";
1	hq_isoforms.fasta.no5merge.collapsed.gff	exon	144321600	144321700	.	-	.	gene_id "SE:1:144319536-144320290:144320325-144321600:-"; transcript_id "SE:1:144319536-144320290:144320325-144321600:-:alternative1";
1	hq_isoforms.fasta.no5merge.collapsed.gff	exon	144596209	144596309	.	-	.	gene_id "SE:1:144596309-144598368:144598454-144600610:-"; transcript_id "SE:1:144596309-144598368:144598454-144600610:-:alternative2";
1	hq_isoforms.fasta.no5merge.collapsed.gff	exon	144600610	144600710	.	-	.	gene_id "SE:1:144596309-144598368:144598454-144600610:-"; transcript_id "SE:1:144596309-144598368:144598454-144600610:-:alternative2";
1	hq_isoforms.fasta.no5merge.collapsed.gff	exon	144596209	144596309	.	-	.	gene_id "SE:1:144596309-144598368:144598454-144600610:-"; transcript_id "SE:1:144596309-144598368:144598454-144600610:-:alternative1";
1	hq_isoforms.fasta.no5merge.collapsed.gff	exon	144598368	144598454	.	-	.	gene_id "SE:1:144596309-144598368:144598454-144600610:-"; transcript_id "SE:1:144596309-144598368:144598454-144600610:-:alternative1";
1	hq_isoforms.fasta.no5merge.collapsed.gff	exon	144600610	144600710	.	-	.	gene_id "SE:1:144596309-144598368:144598454-144600610:-"; transcript_id "SE:1:144596309-144598368:144598454-144600610:-:alternative1";
1	hq_isoforms.fasta.no5merge.collapsed.gff	exon	144602758	144602858	.	-	.	gene_id "SE:1:144602858-144603428:144603523-144606717:-"; transcript_id "SE:1:144602858-144603428:144603523-144606717:-:alternative2";
1	hq_isoforms.fasta.no5merge.collapsed.gff	exon	144606717	144606817	.	-	.	gene_id "SE:1:144602858-144603428:144603523-144606717:-"; transcript_id "SE:1:144602858-144603428:144603523-144606717:-:alternative2";
1	hq_isoforms.fasta.no5merge.collapsed.gff	exon	144602758	144602858	.	-	.	gene_id "SE:1:144602858-144603428:144603523-144606717:-"; transcript_id "SE:1:144602858-144603428:144603523-144606717:-:alternative1";
1	hq_isoforms.fasta.no5merge.collapsed.gff	exon	144603428	144603523	.	-	.	gene_id "SE:1:144602858-144603428:144603523-144606717:-"; transcript_id "SE:1:144602858-144603428:144603523-144606717:-:alternative1";
1	hq_isoforms.fasta.no5merge.collapsed.gff	exon	144606717	144606817	.	-	.	gene_id "SE:1:144602858-144603428:144603523-144606717:-"; transcript_id "SE:1:144602858-144603428:144603523-144606717:-:alternative1";
1	hq_isoforms.fasta.no5merge.collapsed.gff	exon	144603423	144603523	.	-	.	gene_id "SE:1:144603523-144606717:144606764-144607691:-"; transcript_id "SE:1:144603523-144606717:144606764-144607691:-:alternative2";
1	hq_isoforms.fasta.no5merge.collapsed.gff	exon	144607691	144607791	.	-	.	gene_id "SE:1:144603523-144606717:144606764-144607691:-"; transcript_id "SE:1:144603523-144606717:144606764-144607691:-:alternative2";
1	hq_isoforms.fasta.no5merge.collapsed.gff	exon	144603423	144603523	.	-	.	gene_id "SE:1:144603523-144606717:144606764-144607691:-"; transcript_id "SE:1:144603523-144606717:144606764-144607691:-:alternative1";
1	hq_isoforms.fasta.no5merge.collapsed.gff	exon	144606717	144606764	.	-	.	gene_id "SE:1:144603523-144606717:144606764-144607691:-"; transcript_id "SE:1:144603523-144606717:144606764-144607691:-:alternative1";
1	hq_isoforms.fasta.no5merge.collapsed.gff	exon	144607691	144607791	.	-	.	gene_id "SE:1:144603523-144606717:144606764-144607691:-"; transcript_id "SE:1:144603523-144606717:144606764-144607691:-:alternative1";
1	hq_isoforms.fasta.no5merge.collapsed.gff	exon	144596209	144596309	.	-	.	gene_id "SE:1:144596309-144600610:144600690-144601099:-"; transcript_id "SE:1:144596309-144600610:144600690-144601099:-:alternative2";
1	hq_isoforms.fasta.no5merge.collapsed.gff	exon	144601099	144601199	.	-	.	gene_id "SE:1:144596309-144600610:144600690-144601099:-"; transcript_id "SE:1:144596309-144600610:144600690-144601099:-:alternative2";
1	hq_isoforms.fasta.no5merge.collapsed.gff	exon	144596209	144596309	.	-	.	gene_id "SE:1:144596309-144600610:144600690-144601099:-"; transcript_id "SE:1:144596309-144600610:144600690-144601099:-:alternative1";
1	hq_isoforms.fasta.no5merge.collapsed.gff	exon	144600610	144600690	.	-	.	gene_id "SE:1:144596309-144600610:144600690-144601099:-"; transcript_id "SE:1:144596309-144600610:144600690-144601099:-:alternative1";
1	hq_isoforms.fasta.no5merge.collapsed.gff	exon	144601099	144601199	.	-	.	gene_id "SE:1:144596309-144600610:144600690-144601099:-"; transcript_id "SE:1:144596309-144600610:144600690-144601099:-:alternative1";
1	hq_isoforms.fasta.no5merge.collapsed.gff	exon	144602758	144602858	.	-	.	gene_id "SE:1:144602858-144603428:144603523-144607691:-"; transcript_id "SE:1:144602858-144603428:144603523-144607691:-:alternative2";
1	hq_isoforms.fasta.no5merge.collapsed.gff	exon	144607691	144607791	.	-	.	gene_id "SE:1:144602858-144603428:144603523-144607691:-"; transcript_id "SE:1:144602858-144603428:144603523-144607691:-:alternative2";
1	hq_isoforms.fasta.no5merge.collapsed.gff	exon	144602758	144602858	.	-	.	gene_id "SE:1:144602858-144603428:144603523-144607691:-"; transcript_id "SE:1:144602858-144603428:144603523-144607691:-:alternative1";
1	hq_isoforms.fasta.no5merge.collapsed.gff	exon	144603428	144603523	.	-	.	gene_id "SE:1:144602858-144603428:144603523-144607691:-"; transcript_id "SE:1:144602858-144603428:144603523-144607691:-:alternative1";
1	hq_isoforms.fasta.no5merge.collapsed.gff	exon	144607691	144607791	.	-	.	gene_id "SE:1:144602858-144603428:144603523-144607691:-"; transcript_id "SE:1:144602858-144603428:144603523-144607691:-:alternative1";
1	hq_isoforms.fasta.no5merge.collapsed.gff	exon	144596209	144596309	.	-	.	gene_id "SE:1:144596309-144598030:144598049-144598368:-"; transcript_id "SE:1:144596309-144598030:144598049-144598368:-:alternative2";
1	hq_isoforms.fasta.no5merge.collapsed.gff	exon	144598368	144598468	.	-	.	gene_id "SE:1:144596309-144598030:144598049-144598368:-"; transcript_id "SE:1:144596309-144598030:144598049-144598368:-:alternative2";
1	hq_isoforms.fasta.no5merge.collapsed.gff	exon	144596209	144596309	.	-	.	gene_id "SE:1:144596309-144598030:144598049-144598368:-"; transcript_id "SE:1:144596309-144598030:144598049-144598368:-:alternative1";
1	hq_isoforms.fasta.no5merge.collapsed.gff	exon	144598030	144598049	.	-	.	gene_id "SE:1:144596309-144598030:144598049-144598368:-"; transcript_id "SE:1:144596309-144598030:144598049-144598368:-:alternative1";
1	hq_isoforms.fasta.no5merge.collapsed.gff	exon	144598368	144598468	.	-	.	gene_id "SE:1:144596309-144598030:144598049-144598368:-"; transcript_id "SE:1:144596309-144598030:144598049-144598368:-:alternative1";
1	hq_isoforms.fasta.no5merge.collapsed.gff	exon	144602758	144602858	.	-	.	gene_id "SE:1:144602858-144606717:144606764-144607691:-"; transcript_id "SE:1:144602858-144606717:144606764-144607691:-:alternative2";
1	hq_isoforms.fasta.no5merge.collapsed.gff	exon	144607691	144607791	.	-	.	gene_id "SE:1:144602858-144606717:144606764-144607691:-"; transcript_id "SE:1:144602858-144606717:144606764-144607691:-:alternative2";
1	hq_isoforms.fasta.no5merge.collapsed.gff	exon	144602758	144602858	.	-	.	gene_id "SE:1:144602858-144606717:144606764-144607691:-"; transcript_id "SE:1:144602858-144606717:144606764-144607691:-:alternative1";
1	hq_isoforms.fasta.no5merge.collapsed.gff	exon	144606717	144606764	.	-	.	gene_id "SE:1:144602858-144606717:144606764-144607691:-"; transcript_id "SE:1:144602858-144606717:144606764-144607691:-:alternative1";
1	hq_isoforms.fasta.no5merge.collapsed.gff	exon	144607691	144607791	.	-	.	gene_id "SE:1:144602858-144606717:144606764-144607691:-"; transcript_id "SE:1:144602858-144606717:144606764-144607691:-:alternative1";
1	hq_isoforms.fasta.no5merge.collapsed.gff	exon	144596209	144596309	.	-	.	gene_id "SE:1:144596309-144598369:144598454-144600610:-"; transcript_id "SE:1:144596309-144598369:144598454-144600610:-:alternative2";
1	hq_isoforms.fasta.no5merge.collapsed.gff	exon	144600610	144600710	.	-	.	gene_id "SE:1:144596309-144598369:144598454-144600610:-"; transcript_id "SE:1:144596309-144598369:144598454-144600610:-:alternative2";
1	hq_isoforms.fasta.no5merge.collapsed.gff	exon	144596209	144596309	.	-	.	gene_id "SE:1:144596309-144598369:144598454-144600610:-"; transcript_id "SE:1:144596309-144598369:144598454-144600610:-:alternative1";
1	hq_isoforms.fasta.no5merge.collapsed.gff	exon	144598369	144598454	.	-	.	gene_id "SE:1:144596309-144598369:144598454-144600610:-"; transcript_id "SE:1:144596309-144598369:144598454-144600610:-:alternative1";
1	hq_isoforms.fasta.no5merge.collapsed.gff	exon	144600610	144600710	.	-	.	gene_id "SE:1:144596309-144598369:144598454-144600610:-"; transcript_id "SE:1:144596309-144598369:144598454-144600610:-:alternative1";
1	hq_isoforms.fasta.no5merge.collapsed.gff	exon	145012799	145012899	.	-	.	gene_id "SE:1:145012899-145013145:145013202-145013500:-"; transcript_id "SE:1:145012899-145013145:145013202-145013500:-:alternative2";
1	hq_isoforms.fasta.no5merge.collapsed.gff	exon	145013500	145013600	.	-	.	gene_id "SE:1:145012899-145013145:145013202-145013500:-"; transcript_id "SE:1:145012899-145013145:145013202-145013500:-:alternative2";
1	hq_isoforms.fasta.no5merge.collapsed.gff	exon	145012799	145012899	.	-	.	gene_id "SE:1:145012899-145013145:145013202-145013500:-"; transcript_id "SE:1:145012899-145013145:145013202-145013500:-:alternative1";
1	hq_isoforms.fasta.no5merge.collapsed.gff	exon	145013145	145013202	.	-	.	gene_id "SE:1:145012899-145013145:145013202-145013500:-"; transcript_id "SE:1:145012899-145013145:145013202-145013500:-:alternative1";
1	hq_isoforms.fasta.no5merge.collapsed.gff	exon	145013500	145013600	.	-	.	gene_id "SE:1:145012899-145013145:145013202-145013500:-"; transcript_id "SE:1:145012899-145013145:145013202-145013500:-:alternative1";
1	hq_isoforms.fasta.no5merge.collapsed.gff	exon	146285492	146285592	.	-	.	gene_id "SE:1:146285592-146288417:146288482-146288905:-"; transcript_id "SE:1:146285592-146288417:146288482-146288905:-:alternative2";
1	hq_isoforms.fasta.no5merge.collapsed.gff	exon	146288905	146289005	.	-	.	gene_id "SE:1:146285592-146288417:146288482-146288905:-"; transcript_id "SE:1:146285592-146288417:146288482-146288905:-:alternative2";
1	hq_isoforms.fasta.no5merge.collapsed.gff	exon	146285492	146285592	.	-	.	gene_id "SE:1:146285592-146288417:146288482-146288905:-"; transcript_id "SE:1:146285592-146288417:146288482-146288905:-:alternative1";
1	hq_isoforms.fasta.no5merge.collapsed.gff	exon	146288417	146288482	.	-	.	gene_id "SE:1:146285592-146288417:146288482-146288905:-"; transcript_id "SE:1:146285592-146288417:146288482-146288905:-:alternative1";
1	hq_isoforms.fasta.no5merge.collapsed.gff	exon	146288905	146289005	.	-	.	gene_id "SE:1:146285592-146288417:146288482-146288905:-"; transcript_id "SE:1:146285592-146288417:146288482-146288905:-:alternative1";
1	hq_isoforms.fasta.no5merge.collapsed.gff	exon	146276357	146276457	.	-	.	gene_id "SE:1:146276457-146282703:146282787-146285548:-"; transcript_id "SE:1:146276457-146282703:146282787-146285548:-:alternative2";
1	hq_isoforms.fasta.no5merge.collapsed.gff	exon	146285548	146285648	.	-	.	gene_id "SE:1:146276457-146282703:146282787-146285548:-"; transcript_id "SE:1:146276457-146282703:146282787-146285548:-:alternative2";
1	hq_isoforms.fasta.no5merge.collapsed.gff	exon	146276357	146276457	.	-	.	gene_id "SE:1:146276457-146282703:146282787-146285548:-"; transcript_id "SE:1:146276457-146282703:146282787-146285548:-:alternative1";
1	hq_isoforms.fasta.no5merge.collapsed.gff	exon	146282703	146282787	.	-	.	gene_id "SE:1:146276457-146282703:146282787-146285548:-"; transcript_id "SE:1:146276457-146282703:146282787-146285548:-:alternative1";
1	hq_isoforms.fasta.no5merge.collapsed.gff	exon	146285548	146285648	.	-	.	gene_id "SE:1:146276457-146282703:146282787-146285548:-"; transcript_id "SE:1:146276457-146282703:146282787-146285548:-:alternative1";
1	hq_isoforms.fasta.no5merge.collapsed.gff	exon	146296131	146296231	.	-	.	gene_id "SE:1:146296231-146300027:146300116-146303319:-"; transcript_id "SE:1:146296231-146300027:146300116-146303319:-:alternative2";
1	hq_isoforms.fasta.no5merge.collapsed.gff	exon	146303319	146303419	.	-	.	gene_id "SE:1:146296231-146300027:146300116-146303319:-"; transcript_id "SE:1:146296231-146300027:146300116-146303319:-:alternative2";
1	hq_isoforms.fasta.no5merge.collapsed.gff	exon	146296131	146296231	.	-	.	gene_id "SE:1:146296231-146300027:146300116-146303319:-"; transcript_id "SE:1:146296231-146300027:146300116-146303319:-:alternative1";
1	hq_isoforms.fasta.no5merge.collapsed.gff	exon	146300027	146300116	.	-	.	gene_id "SE:1:146296231-146300027:146300116-146303319:-"; transcript_id "SE:1:146296231-146300027:146300116-146303319:-:alternative1";
1	hq_isoforms.fasta.no5merge.collapsed.gff	exon	146303319	146303419	.	-	.	gene_id "SE:1:146296231-146300027:146300116-146303319:-"; transcript_id "SE:1:146296231-146300027:146300116-146303319:-:alternative1";
1	hq_isoforms.fasta.no5merge.collapsed.gff	exon	146968824	146968924	.	-	.	gene_id "SE:1:146968924-146969073:146969152-147131629:-"; transcript_id "SE:1:146968924-146969073:146969152-147131629:-:alternative2";
1	hq_isoforms.fasta.no5merge.collapsed.gff	exon	147131629	147131729	.	-	.	gene_id "SE:1:146968924-146969073:146969152-147131629:-"; transcript_id "SE:1:146968924-146969073:146969152-147131629:-:alternative2";
1	hq_isoforms.fasta.no5merge.collapsed.gff	exon	146968824	146968924	.	-	.	gene_id "SE:1:146968924-146969073:146969152-147131629:-"; transcript_id "SE:1:146968924-146969073:146969152-147131629:-:alternative1";
1	hq_isoforms.fasta.no5merge.collapsed.gff	exon	146969073	146969152	.	-	.	gene_id "SE:1:146968924-146969073:146969152-147131629:-"; transcript_id "SE:1:146968924-146969073:146969152-147131629:-:alternative1";
1	hq_isoforms.fasta.no5merge.collapsed.gff	exon	147131629	147131729	.	-	.	gene_id "SE:1:146968924-146969073:146969152-147131629:-"; transcript_id "SE:1:146968924-146969073:146969152-147131629:-:alternative1";
1	hq_isoforms.fasta.no5merge.collapsed.gff	exon	147676335	147676435	.	-	.	gene_id "SE:1:147676435-147677518:147677625-147678888:-"; transcript_id "SE:1:147676435-147677518:147677625-147678888:-:alternative2";
1	hq_isoforms.fasta.no5merge.collapsed.gff	exon	147678888	147678988	.	-	.	gene_id "SE:1:147676435-147677518:147677625-147678888:-"; transcript_id "SE:1:147676435-147677518:147677625-147678888:-:alternative2";
1	hq_isoforms.fasta.no5merge.collapsed.gff	exon	147676335	147676435	.	-	.	gene_id "SE:1:147676435-147677518:147677625-147678888:-"; transcript_id "SE:1:147676435-147677518:147677625-147678888:-:alternative1";
1	hq_isoforms.fasta.no5merge.collapsed.gff	exon	147677518	147677625	.	-	.	gene_id "SE:1:147676435-147677518:147677625-147678888:-"; transcript_id "SE:1:147676435-147677518:147677625-147678888:-:alternative1";
1	hq_isoforms.fasta.no5merge.collapsed.gff	exon	147678888	147678988	.	-	.	gene_id "SE:1:147676435-147677518:147677625-147678888:-"; transcript_id "SE:1:147676435-147677518:147677625-147678888:-:alternative1";
1	hq_isoforms.fasta.no5merge.collapsed.gff	exon	147713526	147713626	.	-	.	gene_id "SE:1:147713626-147713732:147713902-147714996:-"; transcript_id "SE:1:147713626-147713732:147713902-147714996:-:alternative2";
1	hq_isoforms.fasta.no5merge.collapsed.gff	exon	147714996	147715096	.	-	.	gene_id "SE:1:147713626-147713732:147713902-147714996:-"; transcript_id "SE:1:147713626-147713732:147713902-147714996:-:alternative2";
1	hq_isoforms.fasta.no5merge.collapsed.gff	exon	147713526	147713626	.	-	.	gene_id "SE:1:147713626-147713732:147713902-147714996:-"; transcript_id "SE:1:147713626-147713732:147713902-147714996:-:alternative1";
1	hq_isoforms.fasta.no5merge.collapsed.gff	exon	147713732	147713902	.	-	.	gene_id "SE:1:147713626-147713732:147713902-147714996:-"; transcript_id "SE:1:147713626-147713732:147713902-147714996:-:alternative1";
1	hq_isoforms.fasta.no5merge.collapsed.gff	exon	147714996	147715096	.	-	.	gene_id "SE:1:147713626-147713732:147713902-147714996:-"; transcript_id "SE:1:147713626-147713732:147713902-147714996:-:alternative1";
1	hq_isoforms.fasta.no5merge.collapsed.gff	exon	147855450	147855550	.	-	.	gene_id "SE:1:147855550-147856754:147856907-147858786:-"; transcript_id "SE:1:147855550-147856754:147856907-147858786:-:alternative2";
1	hq_isoforms.fasta.no5merge.collapsed.gff	exon	147858786	147858886	.	-	.	gene_id "SE:1:147855550-147856754:147856907-147858786:-"; transcript_id "SE:1:147855550-147856754:147856907-147858786:-:alternative2";
1	hq_isoforms.fasta.no5merge.collapsed.gff	exon	147855450	147855550	.	-	.	gene_id "SE:1:147855550-147856754:147856907-147858786:-"; transcript_id "SE:1:147855550-147856754:147856907-147858786:-:alternative1";
1	hq_isoforms.fasta.no5merge.collapsed.gff	exon	147856754	147856907	.	-	.	gene_id "SE:1:147855550-147856754:147856907-147858786:-"; transcript_id "SE:1:147855550-147856754:147856907-147858786:-:alternative1";
1	hq_isoforms.fasta.no5merge.collapsed.gff	exon	147858786	147858886	.	-	.	gene_id "SE:1:147855550-147856754:147856907-147858786:-"; transcript_id "SE:1:147855550-147856754:147856907-147858786:-:alternative1";
1	hq_isoforms.fasta.no5merge.collapsed.gff	exon	147974974	147975074	.	-	.	gene_id "SE:1:147975074-147978776:147978835-147984571:-"; transcript_id "SE:1:147975074-147978776:147978835-147984571:-:alternative2";
1	hq_isoforms.fasta.no5merge.collapsed.gff	exon	147984571	147984671	.	-	.	gene_id "SE:1:147975074-147978776:147978835-147984571:-"; transcript_id "SE:1:147975074-147978776:147978835-147984571:-:alternative2";
1	hq_isoforms.fasta.no5merge.collapsed.gff	exon	147974974	147975074	.	-	.	gene_id "SE:1:147975074-147978776:147978835-147984571:-"; transcript_id "SE:1:147975074-147978776:147978835-147984571:-:alternative1";
1	hq_isoforms.fasta.no5merge.collapsed.gff	exon	147978776	147978835	.	-	.	gene_id "SE:1:147975074-147978776:147978835-147984571:-"; transcript_id "SE:1:147975074-147978776:147978835-147984571:-:alternative1";
1	hq_isoforms.fasta.no5merge.collapsed.gff	exon	147984571	147984671	.	-	.	gene_id "SE:1:147975074-147978776:147978835-147984571:-"; transcript_id "SE:1:147975074-147978776:147978835-147984571:-:alternative1";
1	hq_isoforms.fasta.no5merge.collapsed.gff	exon	147972315	147972415	.	-	.	gene_id "SE:1:147972415-147975011:147975074-147984571:-"; transcript_id "SE:1:147972415-147975011:147975074-147984571:-:alternative2";
1	hq_isoforms.fasta.no5merge.collapsed.gff	exon	147984571	147984671	.	-	.	gene_id "SE:1:147972415-147975011:147975074-147984571:-"; transcript_id "SE:1:147972415-147975011:147975074-147984571:-:alternative2";
1	hq_isoforms.fasta.no5merge.collapsed.gff	exon	147972315	147972415	.	-	.	gene_id "SE:1:147972415-147975011:147975074-147984571:-"; transcript_id "SE:1:147972415-147975011:147975074-147984571:-:alternative1";
1	hq_isoforms.fasta.no5merge.collapsed.gff	exon	147975011	147975074	.	-	.	gene_id "SE:1:147972415-147975011:147975074-147984571:-"; transcript_id "SE:1:147972415-147975011:147975074-147984571:-:alternative1";
1	hq_isoforms.fasta.no5merge.collapsed.gff	exon	147984571	147984671	.	-	.	gene_id "SE:1:147972415-147975011:147975074-147984571:-"; transcript_id "SE:1:147972415-147975011:147975074-147984571:-:alternative1";
1	hq_isoforms.fasta.no5merge.collapsed.gff	exon	148180740	148180840	.	-	.	gene_id "SE:1:148180840-148181286:148181356-148182064:-"; transcript_id "SE:1:148180840-148181286:148181356-148182064:-:alternative2";
[truncated: 31,479 more rows]
